# Supplementary material for: Metabolic engineering of the cellulolytic thermophilic fungus Myceliophthora thermophila to produce ethanol from cellobiose
Source: Biotechnol Biofuels. 2020 Feb 1;13:23. doi: 10.1186/s13068-020-1661-y (PMC6995234; doi:10.1186/s13068-020-1661-y)
Supplement: Supplementary file 1 — Additional file 1. Additional tables. [file 13068_2020_1661_MOESM1_ESM.xlsx]

## Sheet: TableS1
Table S1. Primers used in this study.
Primers	Purpose	Sequences (5'–3') of paired primers
ScADH1-F/ScADH1-R	Cloning Adh1 gene from S. cerevisiae	TTTAAACGATATCGAATTCGAGCATACAATCAACTATCTC / GATTTCAGTAACGTTAAGTGCTTTAAAATTTGTATACAC
Pgpd-F/Pgpd-R	Cloning promoter of gpd	AAGAGGAGTCCACCATGGTACTTGCATCGTCCCAAAGC / TTTCGAGAAGAGACCCATTTTGATTTCTGTGATGTGGG
1633-F/1633-R	Cloning cDNA of NCU01633 (glt1)	ATGGGTCTCTTCTCGAAA / CTAAACCTCTCCATGGCT
TcbhI-F/TtrpC-bar-R	Cloning TchbI-PtrpC-bar-TtrpC cassette	AGCCATGGAGAGGTTTAGCACGAACCTCTCTGAAGGAG / GCTAGCGTTAACACTAGTCACCTCTAAACAAGTGTACC
38939-up-F/38939-up-R	Cloning upstream of Mycth_38939	AAGAGGAGTCCACCATGGTACAGGATATTGATAACACC / CGATCTCTAGAAGTCCTCGTCCCGAGCCAAACACTTGG
38939-down-F/38939-down-R	Cloning downstream of Mycth_38939	CAGGTACACTTGTTTAGAGGCCGCTGGACAGGTTCGTG / GCTAGCGTTAACACTAGTCAGCCCATCTGTTGTTAACC
110317-up-F/110317-up-R	Cloning upstream of Mycth_110317	AAGAGGAGTCCACCATGGTACGTCAGGTGTCTGTTCTC / GTCGCTATGCTGGACTTGAGTACGCAGTCGTCACGCC
110317-down-F/110317-down-R	Cloning downstream of Mycth_110317	CAGGTACACTTGTTTAGAGGTATTCCGGGACGTAGTGC / GCTAGCGTTAACACTAGTCACTCCAACTCGCTGAGGAG
110317-out-F	Diagnostic PCR for Mycth_110317 disruption with 110317-down-R	AGCAGATGTCAAGGTCAGTG
103702-up-F/103702-up-R	Cloning upstream of Mycth_103702	AGAGTGAGGAGGAGAGAAAGAAT / TCAATATGGCTGCTAGCAGGGGATATGAGAAC
103702-down-F/103702-down-R	Cloning downstream of Mycth_103702	ACTAGTGATCTATGTGTTTCCCTTTAACTATTTACTTC / ACTCAGATCAGGCTTCGAGCAAC
2295692-up-F/2295692-up-R	Cloning upstream of Mycth_2295692	CACATTGATTCGTCCTGGGTCGG / CCTTCAATATAGAGTAAGGAAGCCTACACCGTCAAG
2295692-down-F/2295692-down-R	Cloning downstream of Mycth_2295692	ATGCCAGAGAATGTGCGACCCCGATCTTC / TAGATAACACACTGCCAAGAGGAG
103702-bar-F/103702-bar-R	Cloning PtrpC-bar cassette for 103702 donor	GCTAGCAGCCATATTGAAGGAGCACTTTTTG / GAAACACATAGATCACTAGTACAGGATTC
Hyg-F/Hyr-R	Cloning PtrpC-hph-TtrpC cassette for promoter change of pyc	TCCTTACTCTCAGAAGATGATATTGAAGGAG / ATCAATTGGCGAAAGAAGGATTACCTCTAAAC
P2298657-F/P2298657-R	Cloning Promoter of Mycth_2298657	TCCTTCTTTCGCCAATTGATGCTACTAGATCGTC / GGTCGCACATTCTCTGGCATTCCGCAGC
2295692QC-F/2295692QC-R	Diagnostic PCR for pyc promoter change	TGGGCGTTATTCTTTGTCCTCGGGCT / AGTGATGATGGGAGCTTAAAACGTAC
KO103702YZ-F/KO103702YZ-R	Diagnostic PCR for Mycth_103702 disruption	GTTCTCATATCCCCTGCTAGCAG / GTGGAAGTAAATAGTTAAAGGGAA
Ptef-cas-F/TtprC-cas-R	Cloning Cas9-expression PCR cassette	TCCGAGGTTCGACATCAG / GCTCCCTCTAAACAAGTG
TtrpC-bar-F/TtrpC-bar-R	Cloning TtrpC terminater	CGAGATCTGAACTTAACGTTACTGAAATCATC / GCTAGCGTTAACACTAGTCACCTCTAAACAAGTGTACC
P-bar-F/P-bar-FR	Cloning PtrpC-bar cassette for cdt-1 and cdt-2 donor	AAGAGGAGTCCACCATGGTACTCGACAGAAGATGATATTG / AACGTTAAGTTCAGATCTCGGTGACGGG
pAN52-F/TtrpC-bar-R2	Cloning Pgpd-CDT1-TtrpC cassette	ACGAGGACTTCTAGAGATCGTTGCATCGTCCCAAAGC / CCTCTAAACAAGTGTACCTG
Ppdc-F/Ppdc-R	Cloning promoter of pdc	AAGAGGAGTCCACCATGGTATCAAGTCCAGCATAGCGAC / TTCTTGTTGAAGATGCCCATGTCTGTTGTTGGCGATGTTTG
Ppdc-F2/TtrpC-bar-R2	Cloning Ppdc-CDT2-TchbI-PtrpC-bar-TtrpC cassette	TCAAGTCCAGCATAGCGAC / CCTCTAAACAAGTGTACCTG
CDT2-F/TcbhI-R	Cloning CDT2-TchbI cassette	ATGGGCATCTTCAACAAGAA / GTATGATGGGTCAGTTCAG
P-bar-F3/TtrpC-bar-R	Cloning PtrpC-bar-TtrpC cassette	CTGAACTGACCCATCATACTCGACAGAAGATGATATTG / GCTAGCGTTAACACTAGTCACCTCTAAACAAGTGTACC
U6p-F/gRNA-R	Cloning U6p-(gene)-sgRNA cassette	AGGATCGGTGGAGTGAAG / AAAAGCACCGACTCGGTGCCAC
38939-gRNA-F/U6p-38939-R	Cloning U6p-38939-sgRNA cassette	CCTCGCACCTTTCTGGACTCGGTGGTTTTAGAGCTAGAAATAGCAAG / AACCACCGAGTCCAGAAAGGTGCGAGGAAAGAAAGAAAAGAAGAGG
110317-gRNA-F/U6p-110317-R	Cloning U6p-110317-sgRNA cassette	CCTCGCTGCTCCTTGATAGGTTAGGTTTTAGAGCTAGAAATAGCAAG / AACCTAACCTATCAAGGAGCAGCGAGGAAAGAAAGAAAAGAAGAGG
103702-gRNA-F/U6p-103702-R	Cloning U6p-103702-sgRNA cassette	CCTCGACAAGGCCAATTCGTCCCAGTTTTAGAGCTAGAAATAGCAAG / AACTGGGACGAATTGGCCTTGTCGAGGAAAGAAAGAAAAGAAGAGG
actin-RT-F/actin-RT-R	RT-qPCR of actin	AACGCTCCTGCCTTCTAC / GTAACACCATCACCAGAGTC
neo-RT-F/neo-RT-R	RT-qPCR of neo	ATCTGACTTACCTATTCTACCCAAG / TCATAGCCGAATAGCCTCTCC
bar-RT-F/bar-RT-R	RT-qPCR of bar	TCTACACCCACCTGCTGAAG / CATATCCGAGCGCCTCGTGCATG

## Sheet: TableS2
Table S2: The profiles of RNA-seq reads mapped to the genome of M. thermophila and the differential expression analysis.
GeneID	Description	G_WT_3d_1_RPKM	G_WT_3d_2_RPKM	G_WT_3d_Average	CB_WT_3d_1_RPKM	CB_WT_3d_2_RPKM	CB_WT_3d_Average	Fold Change FC (CB_WT_3d Vs G_WT_3d)	Log2FC (CB_WT_3d Vs G_WT_3d)	padj (CB_WT_3d Vs G_WT_3d)	G_WT_5d_1_RPKM	G_WT_5d_2_RPKM	G_WT_5d_Average	CB_WT_5d_1_RPKM	CB_WT_5d_2_RPKM	CB_WT_5d_Average	Fold Change FC (CB_WT_5d Vs G_WT_5d)	Log2FC (CB_WT_5d Vs G_WT_5d)	padj (CB_WT_5d Vs G_WT_5d)	CB_JY518_3d_1_RPKM	CB_JY518_3d_2_RPKM	CB_JY518_3d_Average	Fold Change FC (CB_JY518_3d Vs CB_WT_3d)	Log2FC (CB_JY518_3d Vs CB_WT_3d)	padj (CB_JY518_3d Vs CB_WT_3d)	CB_JY518_5d_1_RPKM	CB_JY518_5d_2_RPKM	CB_JY518_5d_Average	Fold Change FC (CB_JY518_5d Vs CB_WT_5d)	Log2FC (CB_JY518_5d Vs CB_WT_5d)	padj (CB_JY518_5d Vs CB_WT_5d)
Mycth_100011		0.683134	0.258605	0.47087	0.187237	0.385521	0.286379	0.608192	-0.717401	0.765363	0.316499	0.115123	0.215811	0.18597	0.315547	0.250758	1.16193	0.216527	0.808414	0.0929953	0.316186	0.20459	0.714404	-0.485189	0.605686	0.724156	0.647846	0.686001	2.73571	1.45191	0.270038
Mycth_100068	Glycoside Hydrolase Family 11 protein	0.238772	0.393191	0.315982	2.169	3.05291	2.61095	8.26299	3.04666	6.99e-06	0.123389	0.36466	0.244024	1.00984	1.13278	1.07131	4.39018	2.13428	0.0227487	1.53176	0.509874	1.02081	0.390974	-1.35486	0.0264286	0.295975	0.126283	0.211129	0.197076	-2.34318	0.0345809
Mycth_100089	dioxygenase-like protein	5.16552	4.2042	4.68486	2.5282	3.23396	2.88108	0.614977	-0.701396	0.260624	2.71537	2.5027	2.60904	2.51109	2.386	2.44855	0.938488	-0.0915898	0.806378	9.97641	10.1611	10.0687	3.49478	1.8052	7.93204e-06	1.32477	1.08336	1.20407	0.491746	-1.02401	0.0278384
Mycth_100127	YCII-related	263.045	239.905	251.475	357.364	339.431	348.397	1.38541	0.470317	0.00883046	195.292	194.352	194.822	152.37	181.218	166.794	0.856137	-0.224086	0.908549	275.126	210.628	242.877	0.697127	-0.520507	0.00328899	150.954	156.243	153.599	0.920886	-0.118906	0.0714113
Mycth_100290	Short-chain dehydrogenase/reductase SDR	19.9801	12.7927	16.3864	12.0609	14.0026	13.0317	0.795279	-0.330467	0.636826	16.5732	13.4184	14.9958	13.5784	12.5762	13.0773	0.872066	-0.197491	0.852639	13.4599	10.6958	12.0779	0.926805	-0.109662	0.327936	12.2715	9.70813	10.9898	0.840373	-0.250898	0.0335782
Mycth_100400		0.0437122	0	0.0218561	0	0	0	0	#NUM!	1	0	0	0	0.0985983	0	0.0492991	#DIV/0!	#DIV/0!	0.818527	0.301991	0	0.150995	#DIV/0!	#DIV/0!	0.551329	0.563518	0.184949	0.374234	7.59108	2.92431	0.314212
Mycth_100401	Xanthine/uracil/vitamin C permease	0.0820411	0.060044	0.0710425	0.155262	0.195807	0.175535	2.47084	1.305	0.635576	0.0847916	0.100237	0.0925141	0.0616846	0.061054	0.0613693	0.663351	-0.592156	1	0.37786	0.400436	0.389148	2.21693	1.14856	0.526423	0.352546	0.289268	0.320907	5.22911	2.38657	0.286416
Mycth_100435		3.14808	4.79382	3.97095	3.80525	4.15493	3.98009	1.0023	0.00331935	0.936784	5.03786	4.59071	4.81429	4.58121	2.26719	3.4242	0.711258	-0.491555	0.764607	3.40765	3.2218	3.31472	0.832826	-0.263913	0.537634	5.53871	7.30437	6.42154	1.87534	0.907152	0.461869
Mycth_100489	Lipoxygenase, C-terminal	7.27065	5.28797	6.27931	6.03706	5.60094	5.819	0.926694	-0.109835	1	7.30307	6.91222	7.10765	6.32932	5.50373	5.91653	0.832417	-0.264621	1	4.46241	2.68928	3.57585	0.614512	-0.702487	0.00750344	8.26898	5.57573	6.92236	1.17	0.226512	0.835385
Mycth_100518	Glycoside Hydrolase Family 61W protein	0	0	0	1.27133	1.14523	1.20828	#DIV/0!	#DIV/0!	0.000187673	0.0723223	0	0.0361611	0.23676	0.0781132	0.157437	4.35376	2.12226	0.707349	0	0	0	0	#NUM!	0.000364424	0.0693925	0	0.0346963	0.220382	-2.18192	0.728073
Mycth_100519	Inositol polyphosphate related phosphatase	16.5764	10.0225	13.2995	11.7464	11.9517	11.8491	0.890942	-0.166597	0.938797	16.6169	13.0958	14.8564	12.0886	11.4607	11.7746	0.792562	-0.335403	0.729943	8.13389	4.84765	6.49077	0.547787	-0.868312	5.5648e-05	15.5421	9.80522	12.6737	1.07636	0.106154	0.45942
Mycth_100541	Extracellular membrane protein, 8-cysteine region, fungi	1.35954	1.86565	1.6126	1.15781	2.25977	1.70879	1.05965	0.0835943	0.961333	2.81024	2.69923	2.75473	0.574989	0.569111	0.57205	0.207661	-2.2677	0.117881	5.36715	2.69579	4.03147	2.35925	1.23833	0.311734	3.87607	3.95471	3.91539	6.84449	2.77494	0.0522828
Mycth_100566	Aminoglycoside phosphotransferase	0	0	0	0.0523849	0	0.0261925	#DIV/0!	#DIV/0!	1	0.0476806	0.0563657	0.0520232	0	0	0	0	#NUM!	0.892232	0	0.0562939	0.028147	1.07462	0.103827	1	0.182996	0	0.0914982	#DIV/0!	#DIV/0!	0.769705
Mycth_100589	Fumarate reductase/succinate dehydrogenase flavoprotein, N-terminal	9.44879	10.2984	9.8736	11.0764	12.2028	11.6396	1.17886	0.237394	0.312941	12.1543	13.1639	12.6591	11.7681	11.6099	11.689	0.923366	-0.115026	0.573034	5.63551	4.93537	5.28544	0.454091	-1.13895	7.65509e-06	11.19	9.59916	10.3946	0.889265	-0.169315	0.104065
Mycth_100608	Hypothetical protein	0.354348	0.048626	0.201487	0.20118	0.498371	0.349776	1.73597	0.795744	0.769036	0.183114	0.216468	0.199791	0.499547	0.296664	0.398106	1.99261	0.994659	0.435366	0.218576	0.270241	0.244408	0.698757	-0.517136	0.707787	0.307468	0.187409	0.247438	0.62154	-0.686082	0.605287
Mycth_100654	Serine/threonine protein kinase	11.3894	6.79435	9.09188	8.79665	8.1879	8.49227	0.93405	-0.0984284	1	13.115	10.6991	11.907	7.63437	7.23248	7.43342	0.624288	-0.679717	0.0154436	9.2683	6.26708	7.76769	0.914677	-0.128666	0.296693	10.5699	8.9446	9.75724	1.31262	0.392446	0.85976
Mycth_100744		22.1933	12.1408	17.1671	15.6277	18.3412	16.9844	0.989362	-0.0154298	0.93007	30.0009	21.9997	26.0003	15.9454	15.6986	15.822	0.60853	-0.7166	0.00687382	20.1246	13.3342	16.7294	0.984984	-0.0218271	0.498567	26.6258	18.4903	22.558	1.42574	0.511711	0.512286
Mycth_100777	Protein of unknown function UPF0029, N-terminal	30.3781	19.382	24.88	16.9631	16.6697	16.8164	0.675898	-0.565123	0.168572	37.6759	27.9458	32.8108	18.3799	15.3994	16.8896	0.514758	-0.958034	0.000877221	51.9914	35.4983	43.7449	2.60133	1.37925	1.14935e-05	50.2551	36.8206	43.5379	2.57778	1.36613	7.0823e-05
Mycth_100809	EXS, C-terminal	43.3273	44.6193	43.9733	50.7309	54.4828	52.6068	1.19633	0.258621	0.130537	31.6014	25.2761	28.4388	45.1232	43.2094	44.1663	1.55303	0.635088	2.32597e-10	22.5044	18.8138	20.6591	0.392708	-1.34847	9.00856e-12	21.2088	14.4682	17.8385	0.403893	-1.30795	1.12263e-15
Mycth_100838	Lipase, active site	2.12835	1.86923	1.99879	1.93339	1.57834	1.75587	0.878465	-0.186944	0.982335	4.67437	3.96559	4.31998	1.98031	3.20738	2.59385	0.60043	-0.735931	0.32772	3.67599	1.94781	2.8119	1.60143	0.67936	0.45253	5.75138	3.32067	4.53602	1.74876	0.806334	0.457652
Mycth_100975		12.9013	9.78548	11.3434	8.65643	7.55788	8.10715	0.714704	-0.484581	0.557051	22.425	13.6131	18.0191	7.27509	9.29548	8.28529	0.459807	-1.1209	0.0544206	8.56571	4.15029	6.358	0.784246	-0.350622	0.373924	10.7001	8.93227	9.8162	1.18478	0.244614	0.931694
Mycth_101019		32.525	43.2348	37.8799	28.0327	24.0497	26.0412	0.687468	-0.540635	0.606737	45.968	31.5993	38.7837	32.9254	43.306	38.1157	0.982778	-0.0250632	0.609884	47.9571	50.9248	49.441	1.89856	0.924909	0.0375901	38.2769	38.3416	38.3093	1.00508	0.00730828	0.40792
Mycth_101105		19.7228	9.26359	14.4932	14.6245	13.4217	14.0231	0.967564	-0.0475707	0.984021	21.2186	16.6731	18.9458	12.1122	10.2532	11.1827	0.590246	-0.760612	0.00431289	36.3604	26.4557	31.4081	2.23974	1.16333	5.49181e-05	25.704	16.1431	20.9235	1.87107	0.90386	0.100102
Mycth_101107	Major facilitator superfamily	9.02989	6.3259	7.67789	3.79017	3.55799	3.67408	0.478527	-1.06333	0.00302546	11.9835	8.71445	10.349	4.67593	3.76526	4.22059	0.407827	-1.29397	2.72445e-05	7.28218	3.51564	5.39891	1.46946	0.555284	0.535009	12.9963	7.02427	10.0103	2.37177	1.24597	0.0997295
Mycth_101172		0.472943	0.259602	0.366272	0.306872	0.310988	0.30893	0.843443	-0.245638	0.995724	0.384056	0.247643	0.31585	0.0761987	0.150839	0.113519	0.359408	-1.4763	0.50286	0.933537	0.453434	0.693485	2.2448	1.16659	0.376828	0.301499	0.214399	0.257949	2.2723	1.18415	0.765173
Mycth_101222	Hypothetical protein	0.0927819	0.0509287	0.0718553	0.0526768	0.0949038	0.0737903	1.02693	0.0383367	1	0.143839	0.11336	0.128599	0.0523203	0.258927	0.155624	1.21015	0.27518	0.937558	0.0915705	0.283038	0.187304	2.53833	1.34388	0.8104	0.414036	0.0490708	0.231553	1.48791	0.573284	0.999293
Mycth_101224	Cytochrome P450	4.88384	5.75056	5.3172	5.14322	5.01129	5.07725	0.954874	-0.0666174	0.954945	14.2192	14.061	14.1401	12.4409	11.6774	12.0591	0.852832	-0.229666	0.91308	51.7436	41.0014	46.3725	9.13338	3.19115	1.12069e-36	37.4309	34.8092	36.12	2.99524	1.58267	2.28382e-09
Mycth_101261	Thiolase-like	7.64552	5.43041	6.53797	5.24026	5.09738	5.16882	0.790585	-0.339007	0.54147	5.88354	7.0903	6.48692	5.8489	5.05904	5.45397	0.840764	-0.250227	0.979417	9.09121	9.41921	9.25521	1.79058	0.840431	0.0166754	3.60818	4.47231	4.04025	0.74079	-0.432864	0.00467
Mycth_101321	Hypothetical protein	0.531875	0.583901	0.557888	0.415211	0.544039	0.479625	0.859715	-0.218069	1	1.37427	1.34029	1.35728	0.262437	0.593723	0.42808	0.315396	-1.66476	0.0434389	1.24671	1.01408	1.13039	2.35683	1.23685	0.216656	1.12081	0.527438	0.824123	1.92516	0.944979	0.603706
Mycth_101345		2.40633	2.9893	2.69782	1.29429	1.48977	1.39203	0.515984	-0.954602	0.302719	4.31954	2.01159	3.16556	2.99956	2.68615	2.84285	0.898056	-0.155123	0.958051	46.2483	35.2353	40.7418	29.2679	4.87125	1.74145e-44	17.1434	12.2578	14.7006	5.17107	2.37046	3.21496e-08
Mycth_101354	Carbohydrate-Binding Module Family 1 protein	0.195016	0.299728	0.247372	2.12582	1.71549	1.92066	7.76425	2.95685	3.27e-06	0.725594	0.953069	0.839332	2.41935	1.43677	1.92806	2.29714	1.19984	0.0315582	0.654397	0.142778	0.398588	0.207527	-2.26863	0.000465246	0.850912	0.453819	0.652365	0.338353	-1.5634	0.0100869
Mycth_101394	Basic-leucine zipper (bZIP) transcription factor	14.014	15.8753	14.9447	39.9436	39.2641	39.6039	2.65003	1.40601	1e-12	18.2203	14.7399	16.4801	38.6196	37.9527	38.2862	2.32318	1.2161	5.23101e-19	30.1477	29.0457	29.5967	0.747319	-0.420204	0.0166295	49.9894	77.2975	63.6434	1.66231	0.733187	0.57634
Mycth_101399	GCN5-related N-acetyltransferase	7.1444	5.19385	6.16913	4.99228	4.86372	4.928	0.798816	-0.324065	0.679095	10.6437	6.39343	8.51857	4.44647	3.01403	3.73025	0.437896	-1.19134	0.0543789	4.07975	2.0118	3.04578	0.618056	-0.694192	0.0144469	9.47801	7.00108	8.23954	2.20884	1.14329	0.00831585
Mycth_101406	Carbohydrate/puine kinase, PfkB, conserved site	12.4327	10.8425	11.6376	13.4136	11.0135	12.2135	1.04949	0.0696905	0.732047	10.4477	10.0321	10.2399	6.72692	7.13374	6.93033	0.676798	-0.563203	0.299859	11.9645	10.0665	11.0155	0.901913	-0.14894	0.326388	14.2109	14.298	14.2545	2.05682	1.04042	0.0200833
Mycth_101411	Tryptophanyl-tRNA synthetase, class Ib	62.1538	56.9536	59.5537	63.9052	62.9937	63.4495	1.06542	0.0914174	0.534858	73.5729	75.527	74.5499	73.4697	74.4578	73.9637	0.992137	-0.0113882	0.110437	103.359	93.0295	98.1944	1.5476	0.630033	0.086724	119.805	107.48	113.642	1.53646	0.619612	0.21371
Mycth_101506	SET	6.66851	4.05059	5.35955	9.14799	9.27935	9.21367	1.71911	0.781664	0.00254911	10.8104	9.67772	10.2441	13.7818	11.5627	12.6722	1.23703	0.306883	0.00975242	16.2031	13.3002	14.7516	1.60106	0.679028	0.12218	30.0097	20.4809	25.2453	1.99217	0.994344	0.0099537
Mycth_101575	RNA recognition motif, RNP-1	2.56484	1.98977	2.27731	1.59209	1.43418	1.51314	0.664441	-0.589787	0.506714	3.14565	2.96655	3.0561	1.27277	1.06888	1.17083	0.383111	-1.38416	0.010846	1.89008	1.50225	1.69616	1.12096	0.164734	1	5.42601	3.4003	4.41315	3.76927	1.91428	0.0005796
Mycth_101588	Protein-tyrosine phosphatase, active site	20.9927	19.0057	19.9992	13.9147	12.5766	13.2457	0.66231	-0.594421	0.0639828	28.8791	19.9963	24.4377	14.2611	13.1973	13.7292	0.561804	-0.83186	0.01625	19.4402	20.0712	19.7557	1.49148	0.576748	0.192587	26.5674	19.0736	22.8205	1.66219	0.733081	0.109611
Mycth_101623	Heat shock protein Hsp70	0.658161	0.942443	0.800302	0.617368	0.409782	0.513575	0.641727	-0.639969	0.68406	0.621077	0.699245	0.660161	0.322731	0.319432	0.321082	0.486369	-1.03988	0.440599	0.564842	0.628519	0.596681	1.16182	0.216383	1	0.681049	0.151344	0.416196	1.29623	0.374323	1
Mycth_101673		2.87511	1.98733	2.43122	1.47515	1.74273	1.60894	0.661785	-0.595566	0.363838	3.08156	2.47195	2.77675	1.94555	1.56906	1.7573	0.632863	-0.660035	0.292472	1.00892	1.03949	1.0242	0.63657	-0.651609	0.0907788	3.65367	2.36538	3.00952	1.71258	0.776171	0.327151
Mycth_101679	Src homology-3	2.13474	1.99016	2.06245	2.96265	2.77277	2.86771	1.39044	0.475544	0.128434	2.83668	2.09069	2.46369	3.45851	2.98817	3.22334	1.30834	0.387738	0.0246844	5.38422	4.58953	4.98687	1.73897	0.798235	0.0725071	4.09945	2.61648	3.35797	1.04177	0.0590312	0.519188
Mycth_101730		0.103765	0.113915	0.10884	0.117825	0.159208	0.138517	1.27266	0.347845	0.937284	0.0268111	0.126779	0.076795	0.0877709	0.0289579	0.0583644	0.760002	-0.395925	1	0.256027	0.189926	0.222976	1.60975	0.686833	0.844783	0.2058	0.0548798	0.13034	2.23321	1.15912	0.848814
Mycth_10175	Fungal transcriptional regulatory protein, N-terminal	11.8847	6.85627	9.37047	10.7421	11.1052	10.9237	1.16576	0.221268	0.408852	12.5827	10.9789	11.7808	9.80756	9.35431	9.58094	0.813266	-0.2982	0.910034	22.3407	17.0423	19.6915	1.80264	0.85011	0.016085	17.0903	11.2054	14.1479	1.47667	0.562345	0.454679
Mycth_101762		17.3807	11.1637	14.2722	11.0756	11.9936	11.5346	0.808188	-0.307238	0.708438	20.6445	15.4037	18.0241	11.8783	11.1777	11.528	0.639591	-0.644779	0.113276	37.6871	30.2616	33.9744	2.94543	1.55848	4.22024e-07	27.5257	17.0676	22.2967	1.93413	0.951682	0.074761
Mycth_101800	Glycoside Hydrolase Family 30 protein	1.55252	1.31702	1.43477	2.92479	2.41814	2.67146	1.86194	0.896806	0.0471936	2.07865	2.28484	2.18175	1.91013	1.53612	1.72312	0.789791	-0.340457	0.94321	3.41275	1.98054	2.69665	1.00943	0.0135368	0.822565	2.30936	1.71686	2.01311	1.16829	0.224397	0.930953
Mycth_101870	Polynucleotidyl transferase, Ribonuclease H fold	3.56273	2.48331	3.02302	1.73377	2.14025	1.93701	0.640753	-0.642159	0.321551	4.03286	3.07466	3.55376	1.43503	2.24101	1.83802	0.517205	-0.951191	0.0609668	16.2695	22.1853	19.2274	9.92631	3.31126	4.34528e-05	3.89753	4.51627	4.2069	2.28882	1.1946	0.06284
Mycth_101972	Glycoside Hydrolase Family 95 protein	0.757922	0.700681	0.729302	0.158535	0.102007	0.130271	0.178625	-2.485	0.00245168	0.865788	0.804174	0.834981	0.157462	0.400763	0.279113	0.334274	-1.5809	0.052767	0.354329	0.170365	0.262347	2.01385	1.00996	0.576159	0.19779	0.0632926	0.130541	0.4677	-1.09634	0.357747
Mycth_102118	Scytalone dehydratase	0.192536	0.739791	0.466163	0.327936	0.393878	0.360907	0.774207	-0.369208	1	0.0994954	0.235237	0.167366	0.217144	0.322386	0.269765	1.61183	0.688695	0.849094	1.42517	0.587344	1.00625	2.78813	1.4793	0.459486	0.38186	0.509145	0.445502	1.65144	0.723729	0.972953
Mycth_102133		0.359123	0.34497	0.352046	0.458757	0.505087	0.481922	1.36892	0.453034	0.819549	0.324768	0.329079	0.326923	0.25314	0.250552	0.251846	0.770352	-0.376411	1	0.708869	0.712095	0.710482	1.47427	0.559999	0.832073	0.578708	0.237418	0.408063	1.62029	0.696251	0.910983
Mycth_102138		13.014	5.09537	9.05471	5.8903	5.86459	5.87744	0.649103	-0.62348	0.695623	3.3861	2.33502	2.86056	0.513196	0.812719	0.662958	0.231758	-2.10931	0.0252956	1.61675	0.666299	1.14152	0.194221	-2.36423	2.70622e-05	0.360993	0.0962646	0.228629	0.344862	-1.53591	0.404893
Mycth_102172	Lipocalin	0.670002	0.472846	0.571424	1.73894	2.44759	2.09326	3.66324	1.87312	0.0023121	0.296771	0.350828	0.323799	0.485767	0.69449	0.590128	1.82251	0.865928	0.381357	0.897418	0.233587	0.565503	0.270153	-1.88815	0.00377853	0.806788	0.202488	0.504638	0.855133	-0.225779	0.757824
Mycth_102226	Metallophosphoesterase	0.151863	0.222291	0.187077	2.70157	2.4336	2.56758	13.7248	3.77871	3.47e-08	0.0523182	0	0.0261591	1.71273	1.07364	1.39319	53.2582	5.73493	1.49927e-06	0.149881	0.247077	0.198479	0.0773018	-3.69335	3.65007e-07	0.250994	0.0535454	0.15227	0.109296	-3.19369	0.000847218
Mycth_102290	Short-chain dehydrogenase/reductase SDR	27.7167	19.8181	23.7674	26.4339	25.988	26.211	1.10281	0.141186	0.532086	29.4626	26.8832	28.1729	30.5737	28.3614	29.4676	1.04595	0.0648202	0.132948	8.21846	4.22759	6.22302	0.23742	-2.07448	3.06119e-14	42.1927	37.4188	39.8058	1.35083	0.43385	0.767325
Mycth_102295	Nitrilase/cyanide hydratase and apolipoprotein N-acyltransferase	17.9819	14.7725	16.3772	12.1962	13.7022	12.9492	0.790688	-0.338819	0.660807	14.9052	13.7128	14.309	10.6845	10.1711	10.4278	0.72876	-0.456484	0.543036	14.0548	10.3083	12.1815	0.940715	-0.0881699	0.476445	18.9688	22.6588	20.8138	1.99599	0.997103	0.0725628
Mycth_102297	Growth factor, receptor	0.783734	0.215099	0.499416	0.889928	0.450932	0.67043	1.34243	0.424844	0.846936	0.303753	0.538624	0.421189	0.773417	0.164038	0.468727	1.11287	0.154281	0.872106	0.435095	0.597709	0.516402	0.770255	-0.376593	0.692131	0.777197	0	0.388598	0.82905	-0.270469	0.883331
Mycth_102322	Polysaccharide Lyase Family 3 protein	1.5261	1.52969	1.52789	3.16438	3.12199	3.14319	2.05721	1.04069	0.0729371	1.02865	1.05388	1.04126	3.2178	2.44423	2.83101	2.71882	1.44298	0.00507286	26.3253	23.7226	25.0239	7.96132	2.99301	1.60326e-17	2.10555	1.61425	1.8599	0.656974	-0.606091	0.189084
Mycth_102448		0.187127	0.47934	0.333234	0	0	0	0	#NUM!	0.21522	0.451269	0.381049	0.416159	0.211045	0	0.105522	0.253562	-1.97959	0.475383	0.984983	0.380564	0.682774	#DIV/0!	#DIV/0!	0.021704	0.185567	0.857729	0.521648	4.94348	2.30553	0.546021
Mycth_102510	Transcription factor jumonji/aspartyl beta-hydroxylase	6.57741	3.84183	5.20962	2.72892	2.76014	2.74453	0.52682	-0.924618	0.058782	9.36894	7.77862	8.57378	2.85311	3.10634	2.97972	0.347539	-1.52475	1.61761e-05	5.28478	2.41807	3.85143	1.40331	0.488833	0.648112	9.44933	5.84241	7.64587	2.56597	1.3595	0.00814629
Mycth_102522	exo-beta-1,3-glucanase	4.18538	3.37429	3.77984	4.08417	3.63448	3.85933	1.02103	0.0300246	0.839566	3.83005	3.14276	3.4864	4.64657	3.89339	4.26998	1.22475	0.29249	0.0538403	9.44477	7.47449	8.45963	2.192	1.13225	0.00179388	7.89022	6.08735	6.98879	1.63673	0.710812	0.262028
Mycth_102533	Sugar transporter, conserved site	9.21895	5.23836	7.22866	9.81056	9.45348	9.63202	1.33248	0.414111	0.0922206	12.1853	6.73551	9.46043	7.7065	7.42087	7.56369	0.799508	-0.322816	0.893435	7.74981	10.9949	9.37233	0.973039	-0.0394303	0.599857	15.1372	10.8296	12.9834	1.71654	0.779507	0.113126
Mycth_102652		116.58	120.67	118.625	117.076	114.755	115.916	0.977158	-0.0333362	0.878736	143.022	129.302	136.162	120.211	135.207	127.709	0.937918	-0.0924662	0.419212	44.0808	40.829	42.4549	0.366256	-1.44907	1.44619e-10	59.3054	62.2981	60.8017	0.476096	-1.07068	1.69225e-09
Mycth_102790		2.71908	2.15587	2.43747	1.54375	1.81555	1.67965	0.689095	-0.537225	0.596374	2.96636	1.43036	2.19836	1.32034	1.72841	1.52438	0.693416	-0.528208	0.724503	3.68992	2.5345	3.11221	1.85289	0.88978	0.191644	5.01829	3.11583	4.06706	2.66801	1.41577	0.027495
Mycth_102792		30.2682	28.9944	29.6313	19.9415	20.4237	20.1826	0.681125	-0.554009	0.132016	37.4271	31.2151	34.3211	22.775	21.8836	22.3293	0.6506	-0.620156	0.0624663	29.6044	20.8758	25.2401	1.25059	0.322604	0.711904	46.3062	36.2889	41.2975	1.84948	0.887117	0.0261275
Mycth_102797	ATPase, P-type, K/Mg/Cd/Cu/Zn/Na/Ca/Na/H-transporter	3.27916	2.40492	2.84204	10.8151	11.9831	11.3991	4.01088	2.00392	2.08e-21	4.09223	3.0921	3.59217	7.99504	7.86774	7.93139	2.20797	1.14272	6.88286e-14	5.12982	3.12137	4.12559	0.361923	-1.46625	1.01328e-10	5.9639	3.91476	4.93933	0.622758	-0.683257	6.35072e-05
Mycth_102849	Carbohydrate-Binding Module Family 18 protein	0.19456	0.341746	0.268153	0.265107	0.238812	0.251959	0.93961	-0.0898653	1	0.12065	0.0475421	0.0840959	0.263313	0.0868736	0.175093	2.08206	1.05801	0.665561	0.268828	0.0474816	0.158155	0.6277	-0.671853	0.757104	0.270112	0.16464	0.217376	1.24149	0.312069	1
Mycth_102871	Fungal transcriptional regulatory protein, N-terminal	6.19352	4.16419	5.17885	3.12939	2.90993	3.01966	0.583075	-0.778245	0.0780187	6.73807	7.34991	7.04399	4.34482	4.135	4.23991	0.601918	-0.73236	0.105346	1.72558	0.940169	1.33288	0.441399	-1.17985	0.00290824	4.81945	4.45113	4.63529	1.09325	0.128626	0.686045
Mycth_102878	Insulin-like	0.757016	0.883005	0.82001	11.4433	10.8406	11.1419	13.5876	3.76421	8.04e-28	0.929094	0.693683	0.811389	3.14828	3.85551	3.5019	4.31593	2.10967	6.58172e-07	13.355	13.2209	13.288	1.19261	0.254119	0.927309	8.35155	4.55425	6.4529	1.84269	0.881811	0.313959
Mycth_102943	Alpha/beta hydrolase fold-3	16.6543	12.1752	14.4148	19.5086	18.6118	19.0602	1.32227	0.403019	0.0722422	14.4929	14.3768	14.4348	12.9318	14.9819	13.9569	0.966887	-0.0485811	0.388259	20.8522	20.1845	20.5184	1.0765	0.106351	0.799717	21.2874	19.7638	20.5256	1.47065	0.55645	0.475736
Mycth_102965	Cytochrome P450	30.979	16.4862	23.7326	121.759	128.521	125.14	5.27293	2.39861	9.89e-38	10.7701	8.65465	9.71239	17.5047	14.4089	15.9568	1.64293	0.716273	4.52886e-07	11.8383	6.03132	8.93481	0.0713984	-3.80796	2.17953e-59	4.49569	3.96286	4.22928	0.265046	-1.91569	3.16615e-17
Mycth_102971	Berberine/berberine-like	5.31735	2.97381	4.14558	5.46823	5.06268	5.26545	1.27014	0.344985	0.320216	3.59462	2.98274	3.28868	3.3568	3.99444	3.67562	1.11766	0.160478	0.280255	2.47544	3.2646	2.87002	0.545065	-0.875499	0.00355476	1.45919	1.41497	1.43708	0.390978	-1.35484	0.000141724
Mycth_102977	Major facilitator superfamily MFS-1	3.86989	3.45184	3.66087	7.7684	8.12884	7.94862	2.17124	1.11852	3.78e-05	3.03543	3.12397	3.0797	5.06595	5.90128	5.48361	1.78057	0.832335	0.000246447	1.29586	0.632431	0.964143	0.121297	-3.04339	2.04122e-17	2.53556	1.75433	2.14495	0.391156	-1.35418	9.29586e-06
Mycth_102985	Acyl carrier protein-like	11.2512	9.71044	10.4808	14.3909	13.8857	14.1383	1.34897	0.431857	0.0161781	10.2369	8.51113	9.374	12.8807	11.7492	12.315	1.31374	0.393675	1.03659e-05	17.344	23.4722	20.4081	1.44346	0.529533	0.586938	12.3764	14.0003	13.1883	1.07092	0.098851	0.395144
Mycth_102997	Major facilitator superfamily	0.385072	0.387509	0.38629	4.55466	4.16854	4.3616	11.291	3.4971	3.4e-17	0.563807	0.235237	0.399522	0.361907	0.895518	0.628712	1.57366	0.654125	0.541077	0.760088	0.704813	0.732451	0.167932	-2.57405	3.01932e-10	0.477324	0.373373	0.425349	0.67654	-0.563754	0.482594
Mycth_103022		0.0674265	0.81424	0.440833	0.229688	0.137937	0.183812	0.416966	-1.262	0.867497	0.348435	0.576665	0.46255	0.228133	0.451602	0.339868	0.73477	-0.444636	1	2.32912	1.06958	1.69935	9.24503	3.20868	0.00688879	1.00296	0.641894	0.822428	2.41985	1.27492	0.613685
Mycth_103025	Protein of unknown function DUF647	83.4201	59.6552	71.5376	70.6739	69.5447	70.1093	0.980034	-0.0290962	0.877392	71.841	67.7059	69.7734	72.3291	71.9209	72.125	1.0337	0.0478211	0.0581947	34.631	30.6416	32.6363	0.465506	-1.10313	2.70827e-08	47.5968	47.3957	47.4962	0.658527	-0.602686	1.24074e-05
Mycth_103032	arabinan endo-1,5-alpha-L-arabinosidase	0.103443	1.07883	0.591138	5.3444	4.92011	5.13226	8.68199	3.11803	4.15e-12	1.60367	0.631926	1.1178	2.62495	2.77132	2.69814	2.4138	1.2713	0.00589353	6.43183	6.87922	6.65553	1.2968	0.37496	0.7623	1.48741	1.09419	1.2908	0.478405	-1.0637	0.0280112
Mycth_103061	Phosphopantetheine attachment site	7.25319	5.54646	6.39982	5.1185	5.23744	5.17797	0.80908	-0.305645	0.624356	9.85704	7.19851	8.52778	5.07533	4.85459	4.96496	0.58221	-0.780389	0.00288565	6.41204	7.12473	6.76839	1.30715	0.386425	0.604356	7.17019	6.24015	6.70517	1.3505	0.433493	0.753412
Mycth_103070	Chitin-binding, domain 3	142.237	239.475	190.856	214.026	218.408	216.217	1.13288	0.179993	0.775236	256.853	402.767	329.81	431.501	438.772	435.136	1.31935	0.399831	0.0958269	159.594	195.875	177.734	0.822018	-0.282758	0.0720575	475.823	485.464	480.643	1.10458	0.143499	0.467205
Mycth_103080	Dihydrodipicolinate synthetase	4.37743	5.2475	4.81246	8.34139	9.98439	9.16289	1.90399	0.929028	0.0012699	5.51222	4.30321	4.90772	8.90914	9.77289	9.34102	1.90333	0.928528	2.57536e-05	15.5431	9.51639	12.5297	1.36744	0.45148	0.498566	17.9624	19.2131	18.5877	1.98991	0.9927	0.031131
Mycth_103090		26.0224	21.7555	23.8889	20.8657	19.0418	19.9537	0.835271	-0.259684	0.753226	29.0464	28.6633	28.8549	10.9718	9.07203	10.0219	0.347321	-1.52566	6.35425e-12	33.7431	25.4515	29.5973	1.4833	0.568806	0.192432	40.971	36.4609	38.7159	3.86313	1.94977	8.18541e-12
Mycth_103096	Phosphopantetheine attachment site	2.12238	2.18477	2.15357	23.4919	23.8063	23.6491	10.9813	3.45698	2.12e-68	3.72838	3.84188	3.78513	44.0959	42.6988	43.3973	11.4652	3.51919	7.49755e-154	9.3281	6.25803	7.79307	0.329529	-1.60152	2.43402e-15	3.02286	4.47088	3.74687	0.0863387	-3.53385	5.51192e-77
Mycth_103122	Protein kinase, core	4.91579	3.16354	4.03966	22.7124	21.8467	22.2796	5.5152	2.46341	1.22e-24	4.46742	3.15835	3.81288	12.9999	15.3742	14.1871	3.72082	1.89562	3.58943e-16	4.80978	4.13682	4.4733	0.20078	-2.31631	1.62316e-18	8.65694	9.45819	9.05756	0.638438	-0.647381	0.000703354
Mycth_103124		0.219859	0.452559	0.336209	2.55891	2.0521	2.3055	6.85735	2.77765	4.48e-09	0.681691	0.570819	0.626255	8.95756	7.08665	8.0221	12.8096	3.67916	1.92767e-28	4.28553	4.22539	4.25546	1.84578	0.884233	0.0947935	3.70643	4.56399	4.13521	0.515477	-0.956019	2.39245e-05
Mycth_103134		4.70794	4.19937	4.45365	9.48889	9.75161	9.62025	2.16008	1.11109	0.000311465	5.35236	3.88266	4.61751	8.76096	9.85386	9.30741	2.01568	1.01126	3.08629e-05	8.59598	11.7768	10.1864	1.05885	0.082494	0.793862	8.22853	11.516	9.87229	1.06069	0.0850044	0.646642
Mycth_103164	Methyltransferase type 12	0.18854	0	0.0942699	0	0	0	0	#NUM!	0.84117	0.0649536	0	0.0324768	0	0	0	0	#NUM!	1	0.682287	0.383436	0.532861	#DIV/0!	#DIV/0!	0.0593413	0.124645	0	0.0623224	#DIV/0!	#DIV/0!	0.955491
Mycth_103320		0.771034	0.338581	0.554808	0	0.473201	0.2366	0.426455	-1.22954	0.883309	0.47813	0.188408	0.333269	0.347833	0	0.173916	0.52185	-0.938293	0.975451	0.608775	0.376335	0.492555	2.0818	1.05783	0.897647	0.305841	0.489345	0.397593	2.28612	1.1929	0.948158
Mycth_103330	Peptidase M20	9.20065	6.94684	8.07374	10.3151	9.68903	10.0021	1.23884	0.308986	0.263361	10.2714	9.29654	9.78399	7.96853	7.88707	7.9278	0.810283	-0.303502	0.925023	8.85064	9.80577	9.32821	0.932629	-0.100624	0.39243	12.9737	11.1283	12.051	1.52009	0.604159	0.44635
Mycth_103334	alpha-mannanase	38.1883	31.831	35.0096	52.8383	57.6159	55.2271	1.57748	0.657625	0.000328294	34.133	35.2958	34.7144	54.3948	52.2599	53.3274	1.53617	0.619341	4.00094e-09	48.2289	62.9942	55.6116	1.00696	0.010008	0.630219	35.5555	37.851	36.7033	0.688263	-0.538968	7.50866e-05
Mycth_103379	GroES-like	13.1159	11.8091	12.4625	15.4823	16.2148	15.8486	1.2717	0.346762	0.155549	17.2615	19.7716	18.5165	17.9316	16.853	17.3923	0.939285	-0.0903647	0.507375	29.5678	39.4928	34.5303	2.17876	1.12351	0.100661	28.0248	26.8488	27.4368	1.57753	0.657663	0.267125
Mycth_103537	Glycoside Hydrolase Family 61L protein	0.292181	0	0.146091	5.72305	3.81051	4.76678	32.6289	5.02808	4.22e-09	0.452966	0.535475	0.49422	2.47144	2.36464	2.41804	4.89264	2.29061	0.000667937	1.87438	1.60438	1.73938	0.364896	-1.45444	0.00339868	0.724361	0.46359	0.593976	0.245643	-2.02536	0.00597031
Mycth_103571	t-SNARE	3.1709	1.97574	2.57332	2.27061	2.24994	2.26027	0.878351	-0.187131	0.951085	3.80864	3.0365	3.42257	3.15734	2.16841	2.66288	0.778035	-0.362094	0.834362	4.84931	2.92806	3.88868	1.72045	0.782784	0.163473	6.82713	4.16993	5.49853	2.06488	1.04606	0.116361
Mycth_103590	Glucose-methanol-choline oxidoreductase, C-terminal	0.852918	0.689939	0.771429	0.892027	0.573963	0.732995	0.950178	-0.0737297	1	0.719129	0.740427	0.729778	1.13913	1.02726	1.0832	1.48428	0.569765	0.136818	0.420891	0.136941	0.278916	0.380516	-1.39397	0.0588729	1.58032	0.902189	1.24125	1.14592	0.196503	0.904622
Mycth_103611	Annexin	6.92918	4.67094	5.80006	8.3742	7.17054	7.77237	1.34005	0.422287	0.172796	6.24013	5.79251	6.01632	3.51895	3.43774	3.47835	0.578152	-0.790478	0.132362	9.99812	6.03235	8.01524	1.03125	0.0443904	0.79173	8.0367	4.84345	6.44008	1.85148	0.888676	0.187361
Mycth_103620		16.9841	22.3564	19.6703	2.62132	3.58414	3.10273	0.157737	-2.66441	0.000380238	12.1852	9.67035	10.9278	2.32463	3.17519	2.74991	0.251643	-1.99055	1.28529e-10	3.58032	8.55138	6.06585	1.955	0.96717	0.615154	1.51255	1.30815	1.41035	0.512872	-0.963328	0.0197575
Mycth_103628	Serine/threonine protein kinase, active site	63.0073	56.3298	59.6685	54.2734	54.0105	54.1419	0.907378	-0.140224	0.981	67.8061	59.6327	63.7194	64.9804	60.6624	62.8214	0.985907	-0.0204764	0.18981	59.5719	47.4574	53.5147	0.988414	-0.0168124	0.489869	58.6632	54.784	56.7236	0.902935	-0.147307	0.0466521
Mycth_103671		46.1995	31.3712	38.7853	3.99203	3.22724	3.60964	0.093067	-3.42559	1.43e-28	28.9518	22.6059	25.7788	6.12543	6.86783	6.49663	0.252014	-1.98842	3.00755e-25	2.8025	2.47495	2.63873	0.731023	-0.45201	0.0972702	0.379922	0.810499	0.59521	0.0916183	-3.44822	5.39505e-27
Mycth_103702	Aldose 1-epimerase	87.6221	99.3768	93.4994	316.547	305.465	311.006	3.32629	1.73391	5.69e-23	77.5707	82.9491	80.2599	227.725	211.515	219.62	2.73636	1.45226	3.69422e-38	97.1469	89.5996	93.3732	0.30023	-1.73586	2.4025e-18	197.619	237.194	217.406	0.989921	-0.0146144	0.237621
Mycth_103794	Tetracycline resistance protein, TetB	1.35593	0.71192	1.03392	0.46859	0.391961	0.430276	0.416158	-1.2648	0.160648	2.74185	2.77309	2.75747	0.797861	1.18456	0.991208	0.359463	-1.47608	0.00502412	0.872756	0.323715	0.598236	1.39035	0.475453	0.804378	1.28616	0.873027	1.07959	1.08917	0.123226	0.855597
Mycth_103797	Sugar transporter	0.724102	0.289066	0.506584	1.19595	0.740662	0.968306	1.91144	0.934663	0.281525	0.918464	0.442349	0.680406	0.77953	0.551115	0.665323	0.977832	-0.032342	0.892232	1.55923	0.522109	1.04067	1.07473	0.103979	1	2.05627	1.46223	1.75925	2.64421	1.40283	0.130893
Mycth_103818	NAD(P)-binding	0.151403	0.110808	0.131106	0.0573059	0.258109	0.157708	1.2029	0.266522	0.987395	0.365118	0.123321	0.24422	0.0569181	0.0563362	0.0566272	0.23187	-2.10861	0.555143	0.448279	0.0615821	0.254931	1.61648	0.692852	0.896201	0.400374	0.106766	0.25357	4.47789	2.16282	0.640363
Mycth_103867	Zinc finger, C6HC-type	1.4221	1.28365	1.35288	1.29183	1.293	1.29241	0.955308	-0.0659618	0.99713	1.40445	1.46722	1.43584	1.14052	0.881924	1.01122	0.704275	-0.50579	0.761441	1.55948	1.58104	1.57026	1.21498	0.280934	0.957235	2.53842	2.07252	2.30547	2.27989	1.18896	0.154004
Mycth_104005		6.399	5.90837	6.15369	6.39989	8.58263	7.49126	1.21736	0.283758	0.342986	6.21935	7.04156	6.63045	3.24998	4.87244	4.06121	0.612509	-0.707198	0.355951	35.3415	63.2933	49.3174	6.58332	2.71881	0.0319937	13.6578	16.5854	15.1216	3.72343	1.89663	0.0011914
Mycth_104059	Xeroderma pigmentosum group D protein	6.28701	3.03961	4.66331	4.53863	5.17445	4.85654	1.04144	0.0585732	0.881082	8.39119	6.28246	7.33682	4.55487	4.88012	4.7175	0.642989	-0.637134	0.119972	9.20467	4.19143	6.69805	1.37918	0.463813	0.683079	10.5286	6.18777	8.35818	1.77174	0.825167	0.236066
Mycth_104076	glycerol-3-phosphate dehydrogenase	109.001	101.592	105.297	71.5054	68.684	70.0947	0.665687	-0.587084	0.0410879	96.9649	96.0781	96.5215	90.4577	91.1495	90.8036	0.940761	-0.0881001	0.299587	32.1592	40.4969	36.3281	0.518271	-0.948221	3.34182e-07	65.5112	64.0319	64.7715	0.713314	-0.48739	7.94824e-05
Mycth_104102		2.22058	1.08346	1.65202	1.26073	1.51424	1.38749	0.839873	-0.251757	0.985679	1.78502	3.31598	2.5505	1.2522	0.413132	0.832665	0.326472	-1.61497	0.302743	2.4351	2.86015	2.64762	1.90822	0.932224	0.536334	1.3457	1.30492	1.32531	1.59165	0.670523	0.906199
Mycth_104106	Glycoside Hydrolase Family 3 protein	3.63876	3.38012	3.50944	3.28426	3.14937	3.21681	0.916616	-0.12561	1	3.23039	3.76182	3.49611	2.47283	2.3434	2.40811	0.688798	-0.537847	0.636418	7.45877	4.04165	5.75021	1.78755	0.837982	0.16995	6.47664	4.58915	5.5329	2.29761	1.20013	0.0652438
Mycth_104267	Protein of unknown function DUF1168	9.17688	9.17901	9.17795	10.1888	11.5422	10.8655	1.18387	0.243511	0.442652	15.2455	11.7936	13.5195	11.1931	10.6993	10.9462	0.809658	-0.304616	0.91416	15.6318	10.1196	12.8757	1.18501	0.244897	0.918829	20.8971	15.0998	17.9984	1.64426	0.717441	0.28375
Mycth_104380	Histone-fold	74.304	66.3359	70.3199	61.097	72.5089	66.8029	0.949985	-0.0740226	0.956341	73.9263	72.0007	72.9635	58.0346	61.2548	59.6447	0.817459	-0.290782	0.954457	65.5369	68.522	67.0294	1.00339	0.00488359	0.566963	77.4955	72.7242	75.1099	1.25929	0.332609	1
Mycth_104386	Alpha/beta hydrolase fold-1	2.04016	1.91976	1.97996	2.45843	2.08681	2.27262	1.14781	0.198888	0.744898	3.48557	2.18741	2.83649	1.17394	1.62671	1.40032	0.493681	-1.01835	0.132585	8.62938	4.52167	6.57552	2.89337	1.53275	0.0197689	5.69782	3.03883	4.36833	3.11952	1.64132	0.037396
Mycth_104551	Histidine acid phosphatase	64.6363	49.8739	57.2551	49.1838	46.9499	48.0668	0.839521	-0.252362	0.732547	62.2225	64.4901	63.3563	49.3432	48.239	48.7911	0.770106	-0.376871	0.574668	42.9812	41.9553	42.4683	0.883525	-0.178657	0.153734	53.8083	54.5896	54.199	1.11084	0.151648	0.527527
Mycth_104570	alpha-mannanase	0.686305	0.753437	0.719871	0.831251	0.374401	0.602826	0.837408	-0.255997	0.972904	0.709314	0.670814	0.690064	0.567617	1.32793	0.947771	1.37345	0.457808	0.540517	0.903127	0.44664	0.674883	1.11953	0.162897	1	1.08893	0.677555	0.883242	0.931915	-0.10173	0.744622
Mycth_104582		3.36143	4.27731	3.81937	6.07233	7.03289	6.55261	1.71563	0.778736	0.057323	2.21081	1.77345	1.99213	4.04954	5.54317	4.79636	2.40765	1.26763	0.00174567	3.31754	2.51696	2.91725	0.445204	-1.16746	0.00498201	2.95459	3.15156	3.05308	0.636541	-0.651674	0.0865411
Mycth_104628	beta-xyloxidase	30.4998	24.7788	27.6393	18.4133	15.6496	17.0314	0.616204	-0.698519	0.0112241	31.6252	31.0575	31.3414	19.8839	19.6139	19.7489	0.630122	-0.666297	0.0150132	29.4331	22.4127	25.9229	1.52206	0.606025	0.118851	24.4175	21.6202	23.0189	1.16558	0.221044	0.749445
Mycth_104665	SET	1.15744	1.8354	1.49642	2.33649	2.03897	2.18773	1.46197	0.547916	0.473703	1.595	1.33559	1.46529	2.17563	2.22517	2.2004	1.50168	0.586579	0.221824	1.45965	2.35391	1.90678	0.87158	-0.198294	0.605686	1.40285	1.36034	1.3816	0.627884	-0.671429	0.210633
Mycth_104673	Sugar transporter, conserved site	0.506724	0.704634	0.605679	0.72882	0.725638	0.727229	1.20068	0.263856	0.811522	0.279314	0.330191	0.304752	0.800086	0.791907	0.795996	2.61194	1.38512	0.0546417	0.333406	0.32977	0.331588	0.455961	-1.13302	0.180659	0.502498	0.250132	0.376315	0.472759	-1.08082	0.159935
Mycth_104674	Glycoside Hydrolase Family 31 protein	0.629695	0.786639	0.708167	1.13416	1.5325	1.33333	1.8828	0.912877	0.060975	0.85278	0.610176	0.731478	2.66929	2.66624	2.66776	3.64709	1.86674	4.36303e-09	0.621474	0.556407	0.58894	0.441705	-1.17884	0.0139566	0.667507	0.528263	0.597885	0.224115	-2.15769	2.29485e-08
Mycth_104717	ABC transporter-like	29.9137	19.3781	24.6459	179	168.203	173.602	7.04384	2.81636	5.72e-53	46.7062	37.8099	42.258	163.116	145.958	154.537	3.65699	1.87066	8.90657e-61	29.078	20.2931	24.6856	0.142196	-2.81404	2.50343e-40	25.297	21.0945	23.1957	0.150098	-2.73602	6.78595e-54
Mycth_104726	Terpenoid synthase	0.298733	0.245965	0.272349	3.09529	2.5973	2.8463	10.4509	3.38556	5.41e-18	0.366638	0.27374	0.320189	1.49506	1.35472	1.42489	4.45015	2.15385	2.99944e-07	0.257978	0.182261	0.22012	0.0773355	-3.69273	1.1156e-16	0.314756	0.157995	0.236375	0.16589	-2.5917	4.20522e-07
Mycth_104802	Formylmethionine deformylase	256.857	274.967	265.912	373.123	379.449	376.286	1.41508	0.500881	0.00256477	210.309	240.552	225.43	361.387	357.092	359.239	1.59357	0.672263	8.55897e-11	331.822	417.117	374.469	0.995172	-0.0069818	0.554373	182.553	243.641	213.097	0.59319	-0.753433	2.62748e-06
Mycth_104827	exo-α-L-1,5-arabinanase	8.73273	8.78801	8.76037	8.05674	7.18783	7.62228	0.870087	-0.200769	0.899603	12.222	11.5586	11.8903	9.00249	8.32658	8.66453	0.728704	-0.456596	0.414393	6.95782	3.46873	5.21327	0.683951	-0.548034	0.0459454	16.553	13.3506	14.9518	1.72564	0.787128	0.0947997
Mycth_104887		10.7827	8.73951	9.76113	5.83519	7.14021	6.4877	0.664647	-0.58934	0.164381	12.2188	9.54495	10.8819	5.56119	6.4991	6.03014	0.554147	-0.85166	0.0104124	11.0524	8.59038	9.82139	1.51385	0.59822	0.245573	10.251	9.08053	9.66574	1.6029	0.680688	0.307224
Mycth_104936	Histidine triad-like motif	329.331	600.868	465.1	400.801	411.301	406.051	0.873041	-0.195879	0.986724	241.63	407.957	324.794	521.618	539.79	530.704	1.63397	0.708385	0.00937125	203.213	408.395	305.804	0.753118	-0.409052	0.302961	169.611	301.954	235.783	0.444283	-1.17045	1.60484e-06
Mycth_104945	Ubiquitin-conjugating enzyme, E2	25.2428	20.1476	22.6952	157.072	146.303	151.687	6.68368	2.74064	6.68e-48	25.1103	22.2631	23.6867	96.898	87.8878	92.3929	3.90062	1.9637	1.22573e-54	94.8506	98.9806	96.9156	0.638917	-0.6463	0.000205359	69.2029	95.1633	82.1831	0.889495	-0.168941	0.187195
Mycth_104959		25.5941	16.4971	21.0456	20.4543	21.0689	20.7616	0.986504	-0.0196028	0.865355	29.1231	24.0434	26.5833	20.2511	19.638	19.9445	0.750267	-0.414524	0.411957	29.662	19.9484	24.8052	1.19477	0.256727	0.843676	30.6579	18.7099	24.6839	1.23763	0.307576	0.993871
Mycth_105006	BRO1	19.5401	12.1605	15.8503	14.3412	12.2966	13.3189	0.840293	-0.251035	0.800689	22.0676	16.8697	19.4686	14.3025	13.8529	14.0777	0.723097	-0.46774	0.237833	6.97324	4.29496	5.6341	0.423016	-1.24122	1.18926e-08	20.5192	14.4545	17.4868	1.24216	0.312856	0.996339
Mycth_105063	Glycosyl transferase, family 3, N-terminal	14.2049	9.51862	11.8617	10.2643	9.27764	9.77097	0.823738	-0.279743	0.723913	14.3633	16.3035	15.3334	11.7553	11.6008	11.678	0.761605	-0.392884	0.700974	30.4058	17.8584	24.1321	2.46978	1.30438	0.00612589	38.8443	22.9285	30.8864	2.64483	1.40318	0.0129159
Mycth_105072	Cyclin-related 2	121.869	108.706	115.287	169.618	177.017	173.317	1.50335	0.588182	0.000486026	149.675	135.707	142.691	185.507	184.898	185.202	1.29793	0.376209	1.57822e-06	191.735	218.89	205.313	1.18461	0.244406	0.958737	221.857	203.547	212.702	1.14848	0.199731	0.642453
Mycth_105128	Carbohydrate Esterase Family 3 protein	31.9994	29.7185	30.8589	6.64772	6.90963	6.77867	0.219666	-2.18661	2.4e-22	23.1686	21.8866	22.5276	5.64336	6.14423	5.89379	0.261625	-1.93443	2.74712e-21	12.2227	11.5399	11.8813	1.75275	0.809623	0.0434839	7.44311	8.12455	7.78383	1.32068	0.401284	0.883332
Mycth_105130		43.1038	47.2345	45.1692	62.2203	56.0488	59.1346	1.30918	0.388664	0.0549888	56.7938	52.3779	54.5859	64.0848	71.1735	67.6291	1.23895	0.309117	0.000939397	35.6945	27.9627	31.8286	0.53824	-0.893677	2.8683e-05	35.1694	35.4527	35.311	0.522128	-0.937526	4.64614e-08
Mycth_105157	Src homology-3	110.04	104.134	107.087	152.447	158.314	155.381	1.45097	0.537021	0.00161435	100.329	102.439	101.384	148.497	139.963	144.23	1.42261	0.50854	7.87177e-09	130.6	132.147	131.374	0.845497	-0.242128	0.0665953	107.42	94.693	101.057	0.700664	-0.513206	3.59011e-05
Mycth_105197	Zinc finger, AN1-type	17.1327	12.2685	14.7006	81.7171	89.2237	85.4704	5.81408	2.53955	4.08e-38	13.9769	16.2572	15.117	44.5299	49.7053	47.1176	3.11685	1.64009	2.66999e-23	21.5869	16.1303	18.8586	0.220645	-2.1802	1.60961e-23	20.5688	23.3199	21.9444	0.465736	-1.10241	1.39646e-10
Mycth_105286		117.419	116.836	117.127	113.755	117.011	115.383	0.985107	-0.0216484	0.826207	127.46	139.007	133.233	140.426	136.561	138.494	1.03948	0.0558689	0.0681888	92.876	110.691	101.784	0.882137	-0.180925	0.149667	107.023	149.401	128.212	0.925761	-0.111289	0.268892
Mycth_105318		17.5218	14.1696	15.8457	15.9561	13.6637	14.8099	0.934632	-0.0975292	1	18.4678	18.2284	18.3481	18.0395	16.1509	17.0952	0.931713	-0.102042	0.501253	20.0667	19.0943	19.5805	1.32212	0.402858	0.549368	16.0681	18.7175	17.3928	1.01741	0.0248999	0.307224
Mycth_105405	Ribosomal protein L37e	354.435	400.258	377.347	369.823	392.336	381.079	1.00989	0.0142011	0.801506	340.665	318.655	329.66	376.095	389.549	382.822	1.16126	0.215693	0.000688838	566.915	544.067	555.491	1.45768	0.543672	0.190949	577.976	563.726	570.851	1.49117	0.576442	0.296611
Mycth_105482	Phosphopantetheine attachment site	113.245	63.4198	88.3327	1494.55	1483.6	1489.08	16.8576	4.07533	6.07e-99	41.8469	33.5163	37.6816	551.432	522.828	537.13	14.2544	3.83334	1.02906e-197	42.3962	60.753	51.5746	0.0346353	-4.85161	5.98272e-97	3.55378	5.31267	4.43322	0.00825354	-6.92077	1.04374e-209
Mycth_105575	Ammonium transporter	454.981	334.962	394.971	19.8048	20.6838	20.2443	0.0512552	-4.28616	3.28e-96	485.947	403.414	444.681	39.1196	36.2757	37.6977	0.0847747	-3.56022	9.49995e-134	410.607	256.383	333.495	16.4735	4.04207	2.44771e-16	194.014	145.745	169.879	4.50637	2.17196	4.24489e-21
Mycth_105600		8.4399	4.19689	6.3184	3.77329	4.6323	4.20279	0.665168	-0.58821	0.580112	12.2181	5.71278	8.96543	3.64825	3.21703	3.43264	0.382876	-1.38505	0.144553	12.5381	6.78201	9.66006	2.29849	1.20068	0.0518353	15.3392	7.34104	11.3401	3.30362	1.72405	0.0639994
Mycth_105650	Ubiquitin-conjugating enzyme, E2	200.079	212.068	206.074	200.498	199.946	200.222	0.971602	-0.0415619	0.874443	191.507	168.119	179.813	179.944	193.956	186.95	1.03969	0.0561569	0.0356744	260.025	264.161	262.093	1.30901	0.388481	0.532871	324.221	307.184	315.703	1.6887	0.755915	0.0493024
Mycth_105669	Bromodomain	48.3692	39.262	43.8156	40.5274	38.7553	39.6414	0.904731	-0.144439	0.96551	59.7494	51.6028	55.6761	42.2413	41.7286	41.9849	0.754092	-0.407187	0.411253	58.1528	42.1666	50.1597	1.26534	0.339523	0.620764	55.6767	44.0113	49.844	1.18719	0.247549	0.816927
Mycth_105777	Zinc finger, C2H2-type	42.6345	32.7419	37.6882	61.2176	62.7646	61.9911	1.64484	0.717947	3.71e-05	46.0816	37.3384	41.71	53.91	54.415	54.1625	1.29855	0.376902	6.80431e-06	84.304	169.888	127.096	2.05023	1.03579	0.477458	62.294	115.531	88.9127	1.64159	0.715095	0.701355
Mycth_105786	Zinc finger, PHD-type	38.8151	31.1522	34.9837	30.457	28.4036	29.4303	0.841258	-0.24938	0.7537	51.254	43.9154	47.5847	36.042	31.6008	33.8214	0.710762	-0.492562	0.196922	59.3463	49.0121	54.1792	1.84093	0.880438	0.00582477	58.5577	45.4883	52.023	1.53817	0.621213	0.248723
Mycth_105822	RNA recognition motif, RNP-1	314.667	315.705	315.186	335.735	331.206	333.47	1.05801	0.0813551	0.54366	355.637	344.369	350.003	359.906	359.396	359.651	1.02757	0.0392315	0.0412743	247.917	290.222	269.07	0.806877	-0.309579	0.0276585	368.21	425.676	396.943	1.10369	0.142334	0.532216
Mycth_105847	Thiolase	263.977	259.22	261.598	186.525	184.875	185.7	0.709867	-0.494379	0.126821	265.733	264.215	264.974	164.606	156.067	160.336	0.605102	-0.724749	0.00101305	281.068	248.406	264.737	1.42562	0.511585	0.231978	424.601	349.348	386.974	2.41351	1.27114	1.81231e-06
Mycth_105869		18.7072	16.267	17.4871	15.3005	12.7409	14.0207	0.801775	-0.31873	0.645749	23.6894	17.9908	20.8401	13.3692	16.4889	14.929	0.716362	-0.481239	0.389291	43.0498	29.3814	36.2156	2.583	1.36905	5.10514e-06	32.6941	23.9022	28.2981	1.89551	0.922587	0.0281892
Mycth_105966		54.3245	50.4887	52.4066	65.2159	62.5901	63.903	1.21937	0.286134	0.124633	54.5837	57.8257	56.2047	63.9465	62.4733	63.2099	1.12464	0.16946	0.00681166	66.5716	66.6572	66.6144	1.04243	0.0599514	0.643722	73.2703	60.6602	66.9652	1.05941	0.0832613	0.35434
Mycth_10609	Acyl-CoA N-acyltransferase	44.8656	40.2406	42.5531	28.2339	30.2495	29.2417	0.687182	-0.541237	0.114212	61.1292	51.7734	56.4513	36.0738	32.4039	34.2388	0.60652	-0.721373	0.00470021	61.792	61.7735	61.7828	2.11283	1.07918	0.000373608	58.267	46.7576	52.5123	1.53371	0.617022	0.264966
Mycth_106293	Src homology-3	86.7323	65.0071	75.8697	63.2614	66.2319	64.7467	0.853393	-0.228718	0.784836	81.5181	85.2317	83.3749	66.7126	62.2049	64.4588	0.77312	-0.371236	0.612643	87.0496	74.0787	80.5641	1.2443	0.315331	0.710943	73.3111	63.937	68.624	1.06462	0.0903375	0.334588
Mycth_106343	NAD(P)-binding	547.055	1074.2	810.625	86.9256	95.7816	91.3536	0.112695	-3.1495	0.0540819	362.687	504.146	433.416	139.125	157.831	148.478	0.342576	-1.5455	0.030757	140.272	196.835	168.554	1.84507	0.883673	0.279558	33.6844	66.5845	50.1345	0.337656	-1.56637	1.84077e-08
Mycth_106346	NAD-dependent epimerase/dehydratase	40.2803	31.5707	35.9255	25.5445	23.4399	24.4922	0.68175	-0.552686	0.090697	32.7241	31.5079	32.116	20.4574	20.4284	20.4429	0.636534	-0.651691	0.0321627	23.1264	17.9985	20.5624	0.839549	-0.252313	0.117761	18.1158	11.5394	14.8276	0.725317	-0.463316	0.00175616
Mycth_106388	NAD-dependent histone deacetylase, silent information regulator Sir2	51.0979	40.9163	46.0071	46.8309	46.493	46.662	1.01423	0.0203906	0.757496	51.9776	44.9895	48.4835	47.0865	44.3383	45.7124	0.942844	-0.0849095	0.355614	51.3739	38.7371	45.0555	0.965573	-0.050543	0.405817	40.2175	36.2016	38.2095	0.835868	-0.258652	0.0102328
Mycth_106442	Inorganic pyrophosphatase	4.20643	3.07859	3.64251	2.04323	1.93618	1.98971	0.546247	-0.872376	0.049437	5.12033	4.45411	4.78722	2.95186	3.13038	3.04112	0.635258	-0.654586	0.204461	3.99006	2.16718	3.07862	1.54727	0.629729	0.339744	3.19803	2.86741	3.03272	0.997238	-0.00399026	0.468231
Mycth_106463		145.092	133.345	139.218	105.555	106.996	106.275	0.763372	-0.389541	0.335358	130	128.898	129.449	98.4422	94.325	96.3836	0.744567	-0.425526	0.331548	206.535	254.115	230.325	2.16725	1.11586	0.0394262	125.445	103.13	114.287	1.18575	0.245806	0.800369
Mycth_106502	Calycin-like	0	0	0	0.221037	0.331855	0.276446	#DIV/0!	#DIV/0!	0.268073	0.0670625	0.079278	0.0731703	0.365902	0.217297	0.291599	3.98522	1.99466	0.434536	0.512319	0.079177	0.295748	1.06982	0.097371	1	0.514767	0.205906	0.360336	1.23572	0.305357	1
Mycth_106527	Signal transduction histidine kinase-related protein, C-terminal	68.3771	57.0211	62.6991	142.265	136.801	139.533	2.22544	1.15409	2.11e-11	47.6255	55.7244	51.6749	100.299	98.5442	99.4214	1.92398	0.944091	4.52808e-19	11.6025	12.574	12.0883	0.0866337	-3.52893	6.51504e-57	26.0145	49.3759	37.6952	0.379146	-1.39918	2.44812e-09
Mycth_106599		8.49281	5.35608	6.92444	4.47981	5.82217	5.15099	0.743885	-0.426849	0.565906	11.1431	7.28555	9.21434	4.3476	5.00914	4.67837	0.507727	-0.977876	0.0293854	5.55823	4.37311	4.96567	0.964023	-0.0528605	0.553179	9.82563	7.86846	8.84705	1.89106	0.919191	0.0774983
Mycth_106609	Zinc finger, MYND-type	42.5289	35.5864	39.0576	28.3664	24.4567	26.4116	0.676221	-0.564434	0.116719	45.616	40.9143	43.2651	25.002	25.7183	25.3602	0.586157	-0.770641	0.00922016	46.7989	38.6556	42.7273	1.61775	0.693986	0.0810096	74.8507	68.5057	71.6782	2.82641	1.49897	4.90801e-07
Mycth_106618		70.1569	36.1578	53.1573	49.287	46.9707	48.1288	0.905404	-0.143367	0.981153	84.7927	61.6586	73.2257	48.7853	47.0181	47.9017	0.654165	-0.612274	0.0470245	75.1428	54.6242	64.8835	1.34812	0.43095	0.378147	87.8975	57.9135	72.9055	1.52198	0.605952	0.310796
Mycth_106768	Nitroreductase	131.435	151.527	141.481	229.426	228.948	229.187	1.61991	0.695916	5.35e-05	195.848	234.667	215.258	244.651	274.1	259.375	1.20495	0.268975	0.0466887	91.6213	82.4118	87.0165	0.379675	-1.39716	1.43358e-12	100.835	100.453	100.644	0.388027	-1.36577	1.3677e-17
Mycth_106798	Phospholipase/carboxylesterase	6.99102	7.17432	7.08267	3.71029	4.43045	4.07037	0.574694	-0.799134	0.0698699	8.63907	7.42742	8.03325	2.95671	2.37512	2.66591	0.33186	-1.59135	4.17403e-06	6.03728	4.82167	5.42948	1.3339	0.415653	0.668186	11.0019	7.19393	9.09792	3.41268	1.77091	4.09317e-05
Mycth_106819	1,3-beta-glucan transglucosylase	4163.27	4171.71	4167.49	1952.87	1943.83	1948.35	0.467512	-1.09693	2.18e-06	3828.89	4248.57	4038.73	2500.2	2597.49	2548.84	0.6311	-0.664058	0.121744	2080.59	2469.83	2275.21	1.16776	0.223746	1	2336.15	2558.51	2447.33	0.960174	-0.0586329	0.0753372
Mycth_106827	GCN5-related N-acetyltransferase	42.3496	45.2514	43.8005	33.1617	38.6335	35.8976	0.81957	-0.287061	0.763463	47.1505	40.042	43.5963	38.7063	41.2321	39.9692	0.916804	-0.125315	0.567226	54.2418	43.4748	48.8583	1.36105	0.444717	0.432559	68.8929	62.9787	65.9358	1.64967	0.722174	0.123564
Mycth_106950	Protein of unknown function DUF1777	47.621	44.9553	46.2882	80.4253	85.1519	82.7886	1.78855	0.838789	8.48e-06	40.489	37.6323	39.0606	63.9528	58.6249	61.2888	1.56907	0.649909	4.91829e-08	46.7892	58.3683	52.5787	0.635096	-0.654953	0.000382882	28.4328	28.6017	28.5172	0.465293	-1.10379	6.1619e-10
Mycth_107095		171.779	125.88	148.83	253.799	248.452	251.126	1.68733	0.754746	1.12e-05	95.6082	87.83	91.7191	281.179	272.895	277.037	3.0205	1.59479	4.7208e-46	365.658	317.27	341.464	1.35973	0.443323	0.365882	133.162	105.522	119.342	0.430779	-1.21498	2.04785e-15
Mycth_10713	Glycosyltransferase Family 2 protein	0.884049	1.09575	0.9899	1.19813	0.991777	1.09495	1.10612	0.145512	0.833918	2.71159	2.16024	2.43591	1.44732	1.05052	1.24892	0.51271	-0.963785	0.119544	362.006	402.232	382.119	348.982	8.44701	1.3661e-46	24.7166	18.5515	21.6341	17.3223	4.11456	2.14054e-39
Mycth_107134	SET	39.3884	28.2792	33.8338	27.025	28.2054	27.6152	0.816202	-0.293002	0.639289	36.1824	31.367	33.7747	35.0962	33.9655	34.5308	1.02239	0.0319437	0.102511	39.0448	30.8699	34.9573	1.26587	0.340133	0.655892	25.5732	24.6874	25.1303	0.727764	-0.458458	0.000533942
Mycth_107142	Ran Binding Protein 1	42.6932	25.6713	34.1822	45.1129	46.0693	45.5911	1.33377	0.415506	0.0331149	44.3638	39.6589	42.0113	40.5253	36.3204	38.4228	0.914583	-0.128814	0.481835	54.9319	37.8379	46.3849	1.01741	0.0249029	0.594958	51.7351	38.3023	45.0187	1.17166	0.228559	0.757188
Mycth_107168		7.68662	7.8951	7.79086	4.49631	3.99077	4.24354	0.544682	-0.876514	0.0146943	7.34248	4.30439	5.82344	2.69266	3.34767	3.02017	0.518623	-0.947242	0.150023	2.78738	5.9332	4.36029	1.02751	0.0391555	0.844656	3.4359	5.69762	4.56676	1.51209	0.596543	0.778065
Mycth_107178	mixed-linked glucanase	1602.93	1817.13	1710.03	2941.29	2840.81	2891.05	1.69064	0.757571	4.93e-06	1446.32	1894.62	1670.47	2495.17	2624.96	2560.06	1.53254	0.615922	0.000335413	1370.49	1661.43	1515.96	0.524363	-0.931362	1.51706e-07	1680.76	1673.72	1677.24	0.655157	-0.610086	1.47706e-06
Mycth_107186		29.1348	9.45069	19.2927	16.2918	15.8696	16.0807	0.83351	-0.262729	0.939043	29.6149	18.6873	24.1511	13.3014	11.2649	12.2832	0.508596	-0.975409	0.0483469	21.8436	9.38201	15.6128	0.970904	-0.0425992	0.770494	23.8133	11.8508	17.832	1.45175	0.53779	0.757824
Mycth_107255	WD40 repeat	41.0026	33.8556	37.4291	20.1333	22.5085	21.3209	0.569635	-0.811889	0.0024071	36.6179	34.6226	35.6202	23.5323	23.5038	23.518	0.660243	-0.598931	0.0614012	20.6555	20.6698	20.6627	0.969126	-0.045244	0.406096	18.3365	15.9754	17.1559	0.72948	-0.455059	0.00133473
Mycth_107295	Aflatoxin biosynthesis regulatory protein	398.521	379.418	388.969	314.485	303.621	309.053	0.794543	-0.331803	0.49116	621.592	511.022	566.307	330.953	313.342	322.147	0.568857	-0.813862	2.64329e-05	315.073	243.429	279.251	0.903569	-0.146294	0.1889	433.387	326.122	379.754	1.17882	0.237346	0.771765
Mycth_107458	U3 snoRNA associated	25.654	18.6033	22.1286	17.2948	16.4735	16.8841	0.762999	-0.390247	0.416385	31.3095	23.5796	27.4446	18.6945	17.5275	18.111	0.659913	-0.599653	0.0700947	56.4784	45.0888	50.7836	3.00777	1.5887	6.0196e-09	54.781	36.8451	45.8131	2.52957	1.33889	0.000142847
Mycth_107520		29.0979	25.8192	27.4585	19.3659	19.9505	19.6582	0.715924	-0.482123	0.191617	35.9568	36.4103	36.1836	22.0996	21.342	21.7208	0.600296	-0.736255	0.00356914	24.2189	17.2964	20.7576	1.05593	0.0785115	0.755548	31.3966	32.4581	31.9273	1.46989	0.555711	0.399803
Mycth_107580	ABC transporter, transmembrane region, type 1	90.1145	58.9465	74.5305	42.633	40.6067	41.6199	0.558427	-0.840558	0.00455274	82.1354	62.6733	72.4044	51.9061	47.6609	49.7835	0.687576	-0.540408	0.0567469	101.845	83.045	92.4451	2.22118	1.15132	2.17091e-05	49.4856	47.5307	48.5082	0.974382	-0.0374409	0.111798
Mycth_107689	Immunoglobulin/major histocompatibility complex, conserved site	2.08885	1.92131	2.00508	4.71171	3.00282	3.85727	1.92375	0.943921	0.0891406	3.06328	1.86236	2.46282	2.32399	2.4893	2.40665	0.977191	-0.033287	0.680827	11.3387	10.4366	10.8876	2.82263	1.49704	1.31694e-05	13.3803	9.79354	11.5869	4.81455	2.2674	8.82775e-11
Mycth_107723	Acyl-CoA N-acyltransferase	17.9452	15.1796	16.5624	17.28	14.7012	15.9906	0.965476	-0.0506876	0.934075	20.4636	18.6931	19.5783	15.1945	15.4045	15.2995	0.781452	-0.355771	0.701921	26.8894	23.295	25.0922	1.56918	0.650013	0.0994301	22.6366	22.4725	22.5545	1.4742	0.559932	0.428037
Mycth_107763	MFS general substrate transporter	0.0413944	0	0.0206972	0.423029	0.127023	0.275026	13.2881	3.73206	0.270058	0.0427822	0	0.0213911	0	0	0	0	#NUM!	1	0	0	0	0	#NUM!	0.0877633	0	0	0	#DIV/0!	#DIV/0!	NA
Mycth_107796	Hypothetical protein	6.99114	3.44797	5.21956	0.880389	1.15599	1.01819	0.195072	-2.35792	0.0040176	4.64498	4.14239	4.39369	0.889252	0.689459	0.789355	0.179657	-2.47669	4.84123e-18	2.94412	1.87613	2.41013	2.36707	1.2431	0.00529492	6.45066	5.54626	5.99846	7.59918	2.92584	8.19522e-18
Mycth_107866	N,O-diacetylmuramidase	28.3587	20.3519	24.3553	21.5944	20.5305	21.0624	0.864799	-0.209563	0.8571	12.3773	9.1888	10.7831	11.9397	11.3899	11.6648	1.08177	0.113393	0.183503	18.3438	14.6717	16.5077	0.783752	-0.351531	0.0696714	8.50315	7.09386	7.79851	0.668552	-0.580889	0.00465232
Mycth_107891	WD40 repeat	73.8547	67.3569	70.6058	54.4125	55.9132	55.1628	0.781279	-0.35609	0.436212	72.6348	63.1247	67.8797	54.2747	54.5943	54.4345	0.801926	-0.318459	0.765088	114.218	104.395	109.306	1.98152	0.98661	0.000675076	92.5573	77.5267	85.042	1.56228	0.643654	0.172218
Mycth_107972	Armadillo-type fold	32.8241	23.2354	28.0297	23.7789	24.8236	24.3012	0.866982	-0.205926	0.853242	38.8369	28.8994	33.8682	25.3838	23.0956	24.2397	0.715708	-0.482557	0.216751	36.8106	27.6003	32.2054	1.32526	0.406274	0.482307	35.7665	26.1141	30.9403	1.27643	0.352114	0.954615
Mycth_107976	Methyltransferase type 11	233.516	158.196	195.856	208.539	181.674	195.107	0.996175	-0.00552872	0.827565	102.699	111.542	107.12	40.5437	40.4693	40.5065	0.37814	-1.40301	2.54353e-06	184.364	144.671	164.518	0.843217	-0.246024	0.0851475	51.0065	30.3454	40.6759	1.00418	0.00602085	0.315047
Mycth_108044	Sugar transporter	0.0614174	0.0674249	0.0644211	0.627653	0.31411	0.470882	7.30943	2.86976	0.0310943	0	0.0750388	0.0375194	0.103901	0.239957	0.171929	4.5824	2.1961	0.293983	0.0303078	0	0.0151539	0.0321819	-4.9576	0.00405509	0.24362	0.129931	0.186775	1.08635	0.119493	0.994835
Mycth_108061		16.2801	13.4637	14.8719	10.9837	10.3801	10.6819	0.718264	-0.477413	0.31848	21.9138	15.4589	18.6864	11.8347	13.2081	12.5214	0.670083	-0.577588	0.191415	17.9854	10.5914	14.2884	1.33762	0.419671	0.533113	16.7866	12.7441	14.7654	1.17921	0.237821	0.848208
Mycth_108098	EGF-like region, conserved site	78.7296	71.61	75.1698	78.5091	74.4	76.4546	1.01709	0.0244503	0.747409	62.2656	77.6154	69.9405	60.6889	65.9134	63.3011	0.905071	-0.143897	0.759118	49.6843	37.4111	43.5477	0.569589	-0.812006	4.7292e-05	58.0542	48.979	53.5166	0.845429	-0.242245	0.0178961
Mycth_108115	Thiolase-like	72.6424	66.7697	69.706	51.0808	52.4422	51.7615	0.742568	-0.429404	0.266905	54.8856	59.2196	57.0526	69.0853	70.81	69.9477	1.22602	0.293983	0.00014749	54.8989	50.5269	52.7129	1.01838	0.0262763	0.559088	49.392	51.8292	50.6106	0.72355	-0.466836	0.00019298
Mycth_108157	NDT80/PhoG like DNA-binding	46.8174	33.7048	40.2611	42.25	42.3126	42.2813	1.05018	0.0706311	0.622356	45.0469	49.0143	47.0306	43.9322	46.1046	45.0184	0.957215	-0.0630848	0.346422	32.8738	26.8683	29.8711	0.706484	-0.501271	0.00423742	45.551	42.7535	44.1522	0.980759	-0.0280296	0.136527
Mycth_108294	Cytochrome P450	11.0225	7.43193	9.22723	7.16142	6.89497	7.0282	0.76168	-0.392743	0.496929	11.3024	9.22554	10.264	7.01506	6.94335	6.97921	0.679972	-0.556452	0.240163	11.9065	6.74266	9.32459	1.32674	0.407886	0.595807	14.4307	10.8024	12.6166	1.80773	0.854183	0.0784446
Mycth_108304	HEAT	21.187	16.5836	18.8853	19.9676	19.858	19.9128	1.05441	0.0764349	0.59432	18.7632	19.9168	19.34	19.4073	19.7462	19.5767	1.01224	0.0175535	0.0846198	16.8249	16.7393	16.7821	0.842778	-0.246776	0.0730562	14.7414	14.0864	14.4139	0.736276	-0.441682	0.000303252
Mycth_108314		22.9671	13.0882	18.0277	30.1559	31.2577	30.7068	1.70332	0.768346	6.84e-05	13.1149	9.9452	11.53	20.1533	20.2226	20.188	1.7509	0.808098	9.96098e-10	15.6615	9.5981	12.6298	0.411303	-1.28173	2.62224e-09	10.9529	7.74041	9.34666	0.462981	-1.11097	1.7835e-09
Mycth_108317	Phosphopantetheine attachment site	3.55837	0.824514	2.19144	6.82252	6.38448	6.6035	3.01331	1.59135	0.000187673	1.43942	0.739443	1.08943	2.03126	1.75816	1.89471	1.73918	0.798406	0.00100919	0.719655	1.21007	0.964864	0.146114	-2.77483	1.26114e-29	0.216928	0.138834	0.177881	0.0938827	-3.413	1.27789e-24
Mycth_108391	Glycoside Hydrolase Family 72 protein	1.90335	1.93282	1.91808	2.86366	1.99555	2.42961	1.26668	0.341057	0.600078	3.83597	2.965	3.40049	2.95161	2.01845	2.48503	0.730786	-0.452479	0.743333	1.78458	2.67091	2.22774	0.916914	-0.125141	0.63523	6.1343	3.72462	4.92946	1.98366	0.988167	0.196484
Mycth_108407	Aromatic-ring hydroxylase	256.595	156.802	206.699	2719.31	2852.56	2785.94	13.4783	3.75256	9.48e-87	261.964	181.391	221.677	4112.1	4751.99	4432.04	19.9932	4.32144	2.13179e-59	890.75	723.068	806.909	0.289637	-1.78768	6.81791e-20	20.5495	12.5779	16.5637	0.00373726	-8.0638	6.01587e-138
Mycth_108416	Bifunctional Glycoside Hydrolase Family 13 - Glycosyltransferase Family 5 protein	231.428	257.594	244.511	215.966	221.095	218.53	0.893745	-0.162064	0.965605	224.996	238.428	231.712	192.604	192.537	192.57	0.831078	-0.266944	1	287.262	324.31	305.786	1.39928	0.484689	0.403614	115.161	141.743	128.452	0.667038	-0.58416	9.18762e-06
Mycth_108475	Major facilitator superfamily	19.5745	15.7332	17.6538	19.2996	20.6479	19.9737	1.13141	0.178123	0.354176	21.2242	20.6594	20.9418	24.9098	24.3625	24.6362	1.17641	0.23439	0.00269734	20.0305	10.7164	15.3734	0.769683	-0.377663	0.0904252	29.5718	22.6926	26.1322	1.06072	0.0850506	0.375051
Mycth_108493	necrosis inducing factor	0.600156	0.384336	0.492246	1.19258	0.613882	0.903233	1.83492	0.875718	0.486349	0.413518	0.611052	0.512285	0.789675	0.0558287	0.422752	0.825227	-0.277137	1	1.18464	1.3426	1.26362	1.399	0.484395	0.807964	1.2399	1.58707	1.41348	3.34353	1.74137	0.2131
Mycth_108501	WD40 repeat	84.6517	64.026	74.3388	71.5483	69.529	70.5386	0.94888	-0.0757023	0.959448	90.7849	77.273	84.0289	68.4751	65.1359	66.8055	0.795029	-0.33092	0.695505	76.9821	67.0953	72.0387	1.02127	0.0303578	0.565255	87.3213	73.6964	80.5088	1.20512	0.269181	0.866318
Mycth_108504	Bromodomain	31.2874	25.2651	28.2762	25.5646	27.2685	26.4165	0.934231	-0.0981488	0.990603	37.5868	29.7536	33.6702	26.974	25.9421	26.4581	0.785801	-0.347765	0.636766	31.6588	25.6421	28.6504	1.08457	0.117117	0.819265	34.0651	32.5659	33.3155	1.25918	0.332487	1
Mycth_108565	Syntaxin, N-terminal	58.1157	52.9343	55.525	61.0643	64.8512	62.9577	1.13386	0.181247	0.288303	62.6408	58.394	60.5174	61.1853	58.0828	59.634	0.985403	-0.0212142	0.150793	101.722	126.861	114.291	1.81537	0.860262	0.150775	81.3409	79.5904	80.4657	1.34932	0.432238	0.724301
Mycth_108615	Cytochrome P450	51.7812	35.3958	43.5885	128.771	124.851	126.811	2.90927	1.54066	3.66e-18	30.3164	18.8375	24.5769	47.4632	43.0812	45.2722	1.84206	0.881321	8.69748e-10	7.34517	11.2999	9.32254	0.0735155	-3.76581	1.03558e-61	0.937557	3.05146	1.99451	0.0440559	-4.50452	1.00139e-86
Mycth_108627		44.5917	33.9499	39.2708	39.5181	40.865	40.1916	1.02345	0.0334369	0.729008	50.5541	48.6567	49.6054	36.7415	31.6117	34.1766	0.68897	-0.537487	0.115553	53.6395	50.146	51.8927	1.29113	0.36864	0.599972	44.6295	34.6277	39.6286	1.15952	0.213533	0.731125
Mycth_108765		0.830587	0.350704	0.590646	0.798033	0.392115	0.595074	1.0075	0.0107756	1	0.858434	0.702554	0.780494	0.216172	0.641887	0.42903	0.54969	-0.863309	0.716327	0.504458	0.311848	0.408153	0.685886	-0.543959	0.716712	0.443509	0.473075	0.458292	1.06821	0.0951902	0.970891
Mycth_108781		426.623	414.373	420.498	219.172	235.751	227.461	0.540933	-0.886478	0.00012406	180.367	148.919	164.643	238.837	260.676	249.757	1.51696	0.60118	1.12086e-10	178.366	257.543	217.955	0.958205	-0.0615937	0.569002	22.521	57.1248	39.8229	0.159447	-2.64885	1.19744e-34
Mycth_108836	FAD-dependent pyridine nucleotide-disulphide oxidoreductase	0.0259413	0.0569576	0.0414495	0.0294563	0.0796038	0.0545301	1.31558	0.395699	0.99659	0.134055	0	0.0670276	0.029257	0	0.0146285	0.218246	-2.19598	0.771345	0.256027	0.0949631	0.175495	3.21831	1.6863	0.547263	0.180075	0.384159	0.282117	19.2854	4.26944	0.106139
Mycth_108890	Sugar transporter, conserved site	13.5419	10.987	12.2644	18.3642	17.7828	18.0735	1.47365	0.559394	0.006374	9.14397	9.26534	9.20465	10.0945	10.7975	10.446	1.13486	0.182518	0.0402631	5.4224	4.75267	5.08753	0.281491	-1.82884	1.81754e-14	8.67124	6.38448	7.52786	0.720643	-0.472642	0.00408098
Mycth_108924	Sugar transporter, conserved site	210.633	498.658	354.645	391.025	425.977	408.501	1.15186	0.203963	0.8344	130.623	173.606	152.114	1048.28	1148.61	1098.44	7.22117	2.85223	1.61863e-66	31.92	93.974	62.947	0.154093	-2.69813	1.86864e-31	38.2693	146.787	92.5282	0.0842357	-3.56942	1.4643e-68
Mycth_109046	SANT, DNA-binding	30.9771	22.0807	26.5289	11.6375	12.6323	12.1349	0.457422	-1.1284	3.66e-06	24.8922	23.1341	24.0132	11.501	10.3251	10.913	0.454461	-1.13777	2.92972e-07	43.3176	29.5139	36.4158	3.00091	1.5854	8.68184e-09	23.6044	16.2071	19.9057	1.82403	0.867131	0.0376341
Mycth_109078	Zinc finger, CCHC-type	52.0959	44.8921	48.494	45.0968	45.3632	45.23	0.932693	-0.100527	0.996595	63.5468	53.1365	58.3416	50.515	50.7101	50.6125	0.867519	-0.205032	0.82784	90.5643	83.0434	86.8039	1.91917	0.94048	0.00178108	73.2011	59.2545	66.2278	1.30853	0.387943	0.851621
Mycth_109194	Sugar transporter	16.9736	11.9249	14.4493	15.0751	16.0293	15.5522	1.07633	0.106125	0.560131	19.8791	13.2481	16.5636	16.6152	16.3598	16.4875	0.995404	-0.00664553	0.330279	20.5335	17.252	18.8928	1.2148	0.280713	0.825612	30.7764	24.3374	27.5569	1.67139	0.741047	0.0910636
Mycth_109232	Chromo domain	2.00765	1.26481	1.63623	1.43775	1.42349	1.43062	0.874341	-0.193732	0.930934	1.88632	1.85362	1.86997	1.27364	1.27335	1.2735	0.681024	-0.554222	0.419382	1.40727	0.960428	1.18385	0.827507	-0.273157	0.302608	1.88909	1.64098	1.76504	1.38598	0.470904	0.797907
Mycth_109373	XPA	30.5596	25.2318	27.8957	23.0489	23.967	23.5079	0.842709	-0.246894	0.778339	34.7888	29.6824	32.2356	23.7221	25.9417	24.8319	0.770325	-0.376461	0.583142	34.1673	30.6977	32.4325	1.37964	0.464292	0.382649	34.0135	27.2869	30.6502	1.23431	0.303703	0.972953
Mycth_109377	WD40 repeat	36.3592	25.7311	31.0451	28.2216	28.1835	28.2025	0.908436	-0.138542	0.970871	34.8734	31.3214	33.0974	27.2509	25.6035	26.4272	0.798468	-0.324693	0.747055	30.207	26.411	28.309	1.00378	0.00543688	0.500864	30.8573	31.1472	31.0022	1.17312	0.230348	0.747604
Mycth_109444	endoglucanase	39.1818	37.4418	38.3118	36.6311	35.701	36.166	0.943993	-0.0831525	0.968874	26.9246	27.1136	27.0191	30.3745	30.3918	30.3831	1.1245	0.169288	0.0193672	24.1792	18.9912	21.5852	0.596836	-0.744593	0.000253395	21.0499	15.664	18.3569	0.604182	-0.726945	1.22494e-05
Mycth_109499	MFS general substrate transporter	36.7464	30.6253	33.6859	383.705	370.451	377.078	11.194	3.48465	1.82e-75	67.6985	58.5467	63.1226	425.774	407.03	416.402	6.59672	2.72175	2.92872e-112	20.4716	10.9972	15.7344	0.0417272	-4.58287	1.04092e-84	18.911	18.8203	18.8657	0.0453064	-4.46414	1.07536e-112
Mycth_109510	Heat shock protein Hsp20	42.6121	46.0237	44.3179	896.51	926.951	911.731	20.5725	4.36265	2.91e-108	18.2019	54.8227	36.5123	343.534	335.064	339.299	9.29273	3.2161	7.2505e-116	55.6588	20.2754	37.9671	0.0416429	-4.58579	4.26686e-85	32.9549	85.4093	59.1821	0.174425	-2.51933	2.85564e-44
Mycth_109530	Mov34/MPN/PAD-1	44.1712	43.4741	43.8227	40.3311	39.0073	39.6692	0.905221	-0.143658	0.977742	50.2317	44.419	47.3254	40.5696	40.3496	40.4596	0.854925	-0.22613	0.911518	76.2732	75.1861	75.7297	1.90903	0.93284	0.00268659	74.4578	67.1688	70.8133	1.75022	0.807537	0.0379455
Mycth_109533	D-isomer specific 2-hydroxyacid dehydrogenase, NAD-binding	30.0628	23.5012	26.782	23.3425	21.2249	22.2837	0.83204	-0.265275	0.728668	29.8726	23.6528	26.7627	22.6616	19.7556	21.2086	0.792468	-0.335576	0.749673	35.6959	26.6875	31.1917	1.39976	0.485174	0.320187	46.9406	37.5218	42.2312	1.99123	0.99366	0.00543254
Mycth_109542	Alternative oxidase	1529.01	3036.42	2282.71	1656.59	1706.12	1681.36	0.736562	-0.441121	0.876133	1231.83	1668.83	1450.33	2682.77	2871.45	2777.11	1.91481	0.937204	2.57652e-07	512.234	826.408	669.321	0.398083	-1.32886	4.61769e-09	380.873	882.701	631.787	0.227498	-2.13608	4.93496e-21
Mycth_109566	cellobiohydrolase	19.4014	20.6752	20.0383	1246.8	1184.6	1215.7	60.669	5.92289	4.16e-170	21.1198	20.3901	20.755	1009.76	1008.78	1009.27	48.6281	5.60372	0	2166.28	1283.57	1724.93	1.41887	0.504745	0.377883	770.888	712.482	741.685	0.734869	-0.444441	0.000107053
Mycth_109620	Cytochrome b5	2848.98	4406.13	3627.56	1781.3	1779.37	1780.34	0.490781	-1.02685	0.356733	3508.61	4265.64	3887.13	1967.3	2106.86	2037.08	0.524059	-0.9322	0.0761684	3779.02	4591.75	4185.38	2.3509	1.23321	0.016996	2822.6	3255.44	3039.02	1.49185	0.577103	0.470067
Mycth_109638	Sterol desaturase	1673.76	3169.55	2421.65	1423.08	1470.83	1446.95	0.597507	-0.742973	0.696171	1394.54	1948.58	1671.56	1861.69	2065.94	1963.81	1.17484	0.23246	0.194036	1143.69	1915.74	1529.71	1.05719	0.0802413	0.83874	981.942	2032.8	1507.37	0.767575	-0.381621	0.26615
Mycth_109756		24.3359	22.1205	23.2282	19.5922	19.4097	19.501	0.839538	-0.252333	0.783858	25.7584	26.8651	26.3118	23.3427	23.6718	23.5072	0.893411	-0.162603	0.676007	19.8092	22.7729	21.291	1.09179	0.126702	0.818537	29.9528	28.9699	29.4613	1.25329	0.325718	1
Mycth_109790	Region of unknown function DUF1936	7.14341	6.90109	7.02225	5.7938	5.46964	5.63172	0.801983	-0.318357	0.746937	6.3282	6.68293	6.50556	4.78782	4.6933	4.74056	0.728693	-0.456617	0.632088	5.6804	4.3832	5.0318	0.893475	-0.162501	0.427999	4.08838	2.80654	3.44746	0.727226	-0.459524	0.0705104
Mycth_109795		249.37	225.814	237.592	312.347	313.349	312.848	1.31674	0.396976	0.0212539	226.276	187.755	207.015	284.443	289.423	286.933	1.38605	0.470974	7.8594e-08	93.954	73.1867	83.5704	0.267128	-1.9044	7.26294e-21	133.025	146.542	139.783	0.487164	-1.03752	4.12833e-12
Mycth_109817	Zinc finger, ZZ-type	26.1315	17.7223	21.9269	25.8419	25.4744	25.6582	1.17017	0.226718	0.24749	26.4416	23.0956	24.7686	25.4447	23.2774	24.3611	0.983546	-0.0239355	0.210652	15.8893	11.1723	13.5308	0.527347	-0.923176	6.3544e-06	24.4365	20.9219	22.6792	0.930961	-0.103207	0.0817154
Mycth_109821	chitosanase	13.507	11.2257	12.3663	10.4812	10.8491	10.6651	0.862434	-0.213513	0.860018	12.8876	10.0619	11.4748	6.18405	6.75891	6.47148	0.563974	-0.826299	0.0051035	18.1572	13.1749	15.6661	1.4689	0.55474	0.215555	9.3844	6.85249	8.11845	1.2545	0.327107	1
Mycth_109870	FAD linked oxidase, N-terminal	137.724	94.5039	116.114	245.52	244.442	244.981	2.10984	1.07713	3.7e-10	85.5288	67.9559	76.7424	210.066	212.11	211.088	2.75061	1.45975	8.11253e-40	51.3118	51.7725	51.5422	0.210392	-2.24885	2.61392e-28	22.688	24.6771	23.6826	0.112193	-3.15595	1.05603e-65
Mycth_109876	DSS1/SEM1	91.4708	95.2846	93.3777	76.6621	79.4104	78.0362	0.835705	-0.258934	0.746937	92.6838	86.7139	89.6988	82.7896	88.6645	85.727	0.955721	-0.0653388	0.291893	89.5179	107.785	98.6516	1.26418	0.338199	0.792868	101.316	109.899	105.608	1.23191	0.300891	0.955103
Mycth_109897	TonB box, conserved site	28.0432	24.5998	26.3215	38.4433	42.6637	40.5535	1.5407	0.623586	0.00127882	23.1133	22.2816	22.6975	23.5204	25.0631	24.2918	1.07024	0.0979353	0.0776273	79.0899	68.7631	73.9265	1.82294	0.866264	0.00782386	36.7417	33.3711	35.0564	1.44314	0.52921	0.505436
Mycth_109914		84.2742	81.1971	82.7357	55.9662	56.505	56.2356	0.679702	-0.557025	0.0881637	30.1328	34.4967	32.3147	23.8825	23.2273	23.5549	0.728921	-0.456165	0.545711	0.908674	0.748972	0.828823	0.0147384	-6.08428	2.92566e-74	1.39996	1.55821	1.47908	0.062793	-3.99325	7.42235e-38
Mycth_10995	NAD-dependent histone deacetylase, silent information regulator Sir2	49.6339	45.564	47.5989	60.1712	58.1083	59.1398	1.24246	0.3132	0.087656	61.7072	51.5537	56.6304	64.8495	64.6642	64.7568	1.1435	0.193455	0.00368828	58.6661	65.3038	61.985	1.04811	0.0677902	0.641202	28.4614	41.0122	34.7368	0.536418	-0.898569	1.0847e-06
Mycth_109978	Pyruvate carboxyltransferase	20.513	16.9884	18.7507	13.9846	12.8224	13.4035	0.714826	-0.484336	0.193164	33.3922	23.719	28.5556	22.3231	19.3051	20.8141	0.728897	-0.456212	0.402168	56.0986	22.103	39.1008	2.91721	1.54459	0.150411	75.5982	52.4052	64.0017	3.07492	1.62055	1.74314e-07
Mycth_110022	Aldo/keto reductase	198.923	181.288	190.106	227.075	218.247	222.661	1.17125	0.228048	0.184211	168.315	178.282	173.298	225.586	221.771	223.679	1.29072	0.368171	3.30758e-06	211.415	183.105	197.26	0.885921	-0.17475	0.144425	314.868	328.666	321.767	1.43852	0.524589	0.430668
Mycth_110028	Basic helix-loop-helix dimerisation region bHLH	1290.08	2320.94	1805.51	1648.53	1721.61	1685.07	0.933293	-0.099598	0.999837	643.126	1269.33	956.226	2137.62	2331.61	2234.61	2.33691	1.2246	3.78633e-05	442.152	1238.77	840.462	0.49877	-1.00355	0.0327621	584.364	2014.19	1299.27	0.581432	-0.782318	0.136982
Mycth_110038		193.891	351.23	272.561	198.53	199.645	199.088	0.730435	-0.453172	0.844697	98.7031	137.481	118.092	169.463	183.989	176.726	1.49651	0.581602	0.00492306	49.1288	267.862	158.495	0.796108	-0.328964	0.65126	85.6852	227.648	156.667	0.886498	-0.173812	0.598138
Mycth_110042	Protein of unknown function UPF0005	135.848	141.409	138.629	243.904	266.648	255.276	1.84144	0.880831	1.94e-07	108.029	136.987	122.508	239.699	245.805	242.752	1.98151	0.986602	3.0597e-12	49.1732	70.4471	59.8102	0.234296	-2.09359	1.56297e-25	79.0875	118.266	98.6767	0.406492	-1.2987	1.73667e-13
Mycth_110061	Glycoside Hydrolase Family 16 protein	149.285	139.384	144.334	115.314	117.36	116.337	0.806023	-0.311108	0.565803	114.45	113.907	114.178	84.0907	87.0202	85.5555	0.749313	-0.416359	0.373795	24.1391	15.8302	19.9847	0.171783	-2.54134	1.08461e-32	10.0291	7.37775	8.70345	0.101729	-3.2972	1.42629e-64
Mycth_110187	Cytochrome P450	1342.34	1611.82	1477.08	1231.14	1229.66	1230.4	0.832994	-0.263621	0.853912	1122.74	1211.78	1167.26	1017.36	1007.16	1012.26	0.867213	-0.205542	0.81219	1648.46	2148.13	1898.3	1.54283	0.625577	0.420545	1139.05	1139.19	1139.12	1.12532	0.170339	0.540981
Mycth_110298		135.27	142.66	138.965	138.271	138.707	138.489	0.996575	-0.00494913	0.788039	139.66	166.366	153.013	163.235	160.878	162.057	1.0591	0.082845	0.166802	94.3648	83.4869	88.9259	0.642116	-0.639095	0.000266285	142.196	151.142	146.669	0.905046	-0.143937	0.0295632
Mycth_110317	L-lactate dehydrogenase	268.393	369.219	318.806	846.477	835.218	840.847	2.63749	1.39917	1.79e-13	308.338	375.611	341.974	751.072	721.339	736.206	2.15281	1.10622	8.45829e-22	880.302	1008.53	944.417	1.12317	0.16758	0.903979	486.577	684.082	585.329	0.795062	-0.330861	0.0536948
Mycth_110470		3.49881	3.38012	3.43947	3.73452	4.5809	4.15771	1.20882	0.273604	0.62001	5.13488	3.07785	4.10637	3.07788	4.06189	3.56989	0.869354	-0.201985	0.990232	3.31501	2.13467	2.72484	0.655371	-0.609617	0.17063	4.51052	2.3686	3.43956	0.963492	-0.0536555	0.604388
Mycth_110475		63.2652	64.5677	63.9165	50.6185	53.5704	52.0944	0.815039	-0.295058	0.636488	64.014	69.2454	66.6297	57.3472	52.8909	55.1191	0.827245	-0.273614	1	61.9782	63.2165	62.5974	1.20161	0.264972	0.883968	79.7324	82.395	81.0637	1.4707	0.556505	0.360857
Mycth_110510		254.941	319.572	287.257	92.0454	87.5298	89.7876	0.31257	-1.67775	0.00531573	183.241	208.936	196.089	94.0433	99.0331	96.5382	0.492319	-1.02233	0.00993579	176.331	195.576	185.954	2.07104	1.05035	0.00557514	183.342	187.105	185.223	1.91865	0.940095	0.00524172
Mycth_110532	Heat shock protein Hsp20	56.6468	83.5208	70.0838	910.724	945.138	927.931	13.2403	3.72687	2.28e-85	51.5954	69.9663	60.7809	651.479	673.742	662.61	10.9016	3.44647	5.8445e-162	173.137	103.607	138.372	0.149119	-2.74546	5.72705e-39	81.0906	195.294	138.192	0.208557	-2.26149	3.68847e-28
Mycth_110536	HRDC-like	95.352	78.0263	86.6891	66.6069	60.1031	63.355	0.73083	-0.452392	0.214132	108.159	91.6276	99.8935	72.3352	70.9224	71.6288	0.717052	-0.479851	0.201439	52.3865	36.7393	44.5629	0.703383	-0.507618	0.00630962	85.2854	70.8202	78.0528	1.08968	0.12391	0.458732
Mycth_110640	Globin-like	1034.56	1134.4	1084.48	795.737	789.57	792.653	0.730907	-0.452241	0.390929	1021.08	1022.21	1021.64	807.872	816.873	812.372	0.795162	-0.33068	0.726854	494.391	527.273	510.832	0.644458	-0.633842	0.00017332	368.964	469.262	419.113	0.515913	-0.954802	2.03919e-11
Mycth_110651	Glycoside Hydrolase Family 61G protein	0.14959	0.0821111	0.11585	103.911	103.129	103.52	893.568	9.80343	1.02e-180	0	0.182767	0.0913834	37.5378	41.4122	39.475	431.971	8.75479	3.01555e-147	12.586	7.62079	10.1034	0.0975984	-3.357	2.11952e-47	2.07679	2.09657	2.08668	0.0528607	-4.24166	8.95889e-67
Mycth_110670	Methyltransferase type 11	69.8818	68.7358	69.3088	67.0617	68.6276	67.8446	0.978874	-0.0308046	0.855656	70.9209	64.0862	67.5035	55.001	54.5499	54.7755	0.811446	-0.301433	0.86	126.865	116.18	121.522	1.79119	0.840916	0.00774736	82.7966	62.0496	72.4231	1.32218	0.40292	0.811773
Mycth_110674	Carbohydrate-Binding Module Family 50 protein	282.077	248.746	265.411	475.746	486.088	480.917	1.81197	0.857558	3.82e-07	406.539	360.901	383.72	467.455	427.897	447.676	1.16667	0.222399	0.000446659	3048.99	2937.44	2993.22	6.22398	2.63784	4.54372e-29	1716.21	2089.74	1902.97	4.25079	2.08773	0.000113177
Mycth_110717	Nascent polypeptide-associated complex NAC	408.273	385.011	396.642	387.538	379.342	383.44	0.966716	-0.0488364	0.900297	404.187	352.773	378.48	347.077	355.518	351.297	0.92818	-0.107523	0.377163	517.167	471.679	494.423	1.28944	0.366745	0.570578	491.394	444.815	468.104	1.3325	0.414137	0.769347
Mycth_110792	Yippee-like protein	74.2795	123.478	98.879	79.2711	83.1645	81.2178	0.821386	-0.283868	0.932922	80.8938	86.7535	83.8236	109.505	119.693	114.599	1.36714	0.451166	2.42699e-05	41.7374	79.6516	60.6945	0.747305	-0.42023	0.262537	68.3502	126.189	97.2696	0.848782	-0.236535	0.351943
Mycth_110806	pectin lyase-like protein	8.65696	7.53511	8.09604	3.93198	4.17447	4.05323	0.500644	-0.998144	0.0307731	9.39455	6.72392	8.05924	3.06851	2.62298	2.84574	0.353103	-1.50184	0.0005627	10.0086	8.82804	9.41833	2.32366	1.2164	0.012147	6.31592	5.1672	5.74156	2.0176	1.01264	0.205736
Mycth_110817	Ribosomal protein 60S	390.719	362.424	376.572	403.61	403.753	403.682	1.07199	0.100293	0.493024	367.176	301.215	334.196	325.975	346.361	336.168	1.0059	0.00848833	0.0874772	622.645	634.553	628.599	1.55717	0.638923	0.0811444	729.288	688.454	708.871	2.10868	1.07634	0.000208035
Mycth_110821		705.63	848.157	776.894	575.648	583.421	579.535	0.745964	-0.422822	0.623191	651.765	699.049	675.407	662.217	719.439	690.828	1.02283	0.0325707	0.141097	423.321	494.79	459.055	0.79211	-0.336227	0.0184703	442.589	476.046	459.318	0.66488	-0.588834	2.73684e-06
Mycth_110871	Isocitrate lyase and phosphorylmutase	87.3245	82.2881	84.8063	13.5671	14.2027	13.8849	0.163725	-2.61065	4.73e-37	181.348	183.845	182.597	31.1617	30.5305	30.8461	0.16893	-2.5655	1.12301e-32	71.7666	42.5995	57.1831	4.11836	2.04207	2.84868e-05	35.0827	43.6914	39.3871	1.27689	0.352635	0.980959
Mycth_110897	WD40 repeat	92.9449	89.4133	91.1791	94.4142	95.8506	95.1324	1.04336	0.0612335	0.607774	100.992	100.323	100.657	97.3259	95.9162	96.6211	0.9599	-0.0590445	0.207326	68.3016	72.0858	70.1937	0.737853	-0.438595	0.00586707	59.727	67.1838	63.4554	0.656745	-0.606595	3.50138e-06
Mycth_110931	D-isomer specific 2-hydroxyacid dehydrogenase, NAD-binding	226.325	193.268	209.797	27.992	25.2156	26.6038	0.126807	-2.97929	8.77e-50	219.438	249.74	234.589	50.2926	56.0883	53.1905	0.226739	-2.14089	3.05756e-08	85.4802	43.7992	64.6397	2.42972	1.28079	0.0567926	39.2696	36.5062	37.8879	0.712306	-0.489431	0.00017831
Mycth_110951	Peptidase aspartic, active site	1.43092	0.916351	1.17364	0.677003	1.70759	1.1923	1.0159	0.0227562	0.987395	1.84862	1.31121	1.57991	0.134484	1.4642	0.799344	0.505941	-0.982958	0.670019	2.35373	2.03706	2.1954	1.84132	0.88074	0.612398	1.53724	1.51358	1.52541	1.90833	0.932308	0.763125
Mycth_110956	Flavoprotein pyridine nucleotide cytochrome reductase	519.561	689.797	604.679	536.356	529.01	532.683	0.880935	-0.182893	0.970926	459.329	522.292	490.81	710.811	706.177	708.494	1.44352	0.52959	2.21394e-07	415.454	465.677	440.565	0.827069	-0.27392	0.0416299	264.744	336.633	300.688	0.424405	-1.23649	1.61289e-16
Mycth_111030	Carbonic anhydrase	151.515	169.407	160.461	171.454	170.618	171.036	1.0659	0.0920786	0.595581	144.694	200.857	172.776	157.748	164.922	161.335	0.933782	-0.098843	0.725602	156.921	156.941	156.931	0.917529	-0.124174	0.210237	80.6417	84.9855	82.8136	0.513303	-0.962118	3.22191e-10
Mycth_111035	Peptidase M14, carboxypeptidase A	1.09742	0.702778	0.900098	0.207686	0.187086	0.197386	0.219294	-2.18906	0.0197776	0.75614	0.670405	0.713273	0.20628	0.340286	0.273283	0.38314	-1.38406	0.248318	0.722061	0.446367	0.584214	2.95975	1.56548	0.238009	0.72551	0.612652	0.669081	2.44831	1.29178	0.431611
Mycth_111036	Hypothetical protein	84.3097	96.7602	90.535	60.0069	57.9009	58.9539	0.651173	-0.618887	0.247033	420.614	444.895	432.755	228.674	242.146	235.41	0.54398	-0.878375	0.00240441	110.255	79.4589	94.8568	1.609	0.686164	0.0421421	486.359	751.333	618.846	2.6288	1.39441	0.151635
Mycth_111073	Ferritin/ribonucleotide reductase-like	31.5828	35.269	33.4259	31.7763	30.9282	31.3522	0.937963	-0.0923975	0.981652	51.6648	68.0025	59.8337	68.9325	69.6727	69.3026	1.15825	0.211953	0.124566	68.6773	63.2091	65.9432	2.1033	1.07266	0.000225	60.7134	62.6798	61.6966	0.890249	-0.167718	0.0260459
Mycth_111088	Glycoside Hydrolase Family 61I protein (cellobiose dehydrogenase)	6.7622	6.44797	6.60509	18.8232	22.0944	20.4588	3.09743	1.63107	2.18e-13	9.2653	7.03447	8.14989	11.2872	11.8188	11.553	1.41757	0.503419	0.00116415	7.36038	5.56382	6.4621	0.315859	-1.66265	1.76282e-11	6.16934	4.90481	5.53707	0.479274	-1.06108	3.30948e-06
Mycth_111107	Nucleosome assembly protein (NAP)	111.572	98.8859	105.229	69.5011	68.8658	69.1835	0.657456	-0.605035	0.031756	130.401	101.394	115.898	74.4392	76.9217	75.6804	0.652994	-0.614859	0.0146795	175.77	144.474	160.122	2.31446	1.21067	6.56444e-06	174.244	131.811	153.027	2.02202	1.0158	0.000843764
Mycth_111172		28.9455	36.7179	32.8317	64.5161	64.8324	64.6742	1.96987	0.978101	6.24e-07	27.5688	24.3167	25.9428	48.5253	50.4721	49.4987	1.908	0.932059	2.2496e-14	18.8685	29.4755	24.172	0.37375	-1.41986	5.06033e-12	20.7194	27.9533	24.3363	0.491656	-1.02428	7.26556e-10
Mycth_111173		136.129	210.181	173.155	157.807	165.038	161.422	0.932242	-0.101224	0.999258	100.628	128.204	114.416	151.896	162.711	157.303	1.37483	0.459258	0.00494035	23.4612	65.4823	44.4718	0.2755	-1.85988	2.41499e-09	67.5439	96.4889	82.0164	0.52139	-0.939565	1.40218e-06
Mycth_111214	ERG4/ERG24 ergosterol biosynthesis protein	54.8919	52.3138	53.6029	74.8568	75.0928	74.9748	1.39871	0.484097	0.00515576	43.1213	34.721	38.9212	52.0712	49.2606	50.6659	1.30176	0.380461	1.06446e-05	119.22	155.529	137.374	1.83227	0.873634	0.193202	75.3982	69.6918	72.545	1.43183	0.517861	0.458222
Mycth_111314	Protein of unknown function DUF706	49.0405	47.8592	48.4498	66.2278	73.843	70.0354	1.44552	0.531592	0.00249024	12.2714	14.3975	13.3344	72.2568	87.8281	80.0425	6.00269	2.58561	4.65223e-19	399.361	550.077	474.719	6.77827	2.76092	0.000452711	24.6108	36.3555	30.4832	0.380838	-1.39275	3.79933e-07
Mycth_111331	Thiolase-like	181.315	157.658	169.487	177.403	174.52	175.962	1.03821	0.0540926	0.639289	174.656	180.738	177.697	166.387	164.204	165.295	0.930208	-0.104374	0.339071	121.539	88.6119	105.076	0.597149	-0.743836	4.50136e-05	107.065	114.027	110.546	0.668778	-0.580402	6.94635e-06
Mycth_111372	endoglucanase	2.57573	2.11224	2.34399	51.412	50.0899	50.7509	21.6515	4.4364	1.62e-82	0.86598	1.02372	0.944851	13.4397	13.5102	13.475	14.2615	3.83405	8.98247e-57	50.3215	30.1424	40.2319	0.792732	-0.335095	0.0467321	9.29377	5.21928	7.25653	0.538519	-0.892931	6.07022e-06
Mycth_111377		40.793	43.7469	42.27	38.511	37.7258	38.1184	0.901784	-0.149146	0.977742	49.6869	44.9799	47.3334	41.8244	44.9344	43.3794	0.916466	-0.125847	0.560761	33.7389	27.0687	30.4038	0.797616	-0.326234	0.0710224	42.3918	39.2982	40.845	0.941576	-0.086851	0.124705
Mycth_111388	Cellobiose dehydrogenase family protein	5.68387	6.19958	5.94172	24.6918	23.443	24.0674	4.05057	2.01813	2.02e-24	6.17762	7.52691	6.85226	9.18125	8.00264	8.59195	1.25388	0.326404	0.0214214	18.6205	17.7418	18.1811	0.755425	-0.40464	0.0169589	13.8366	11.8305	12.8335	1.49367	0.578862	0.395241
Mycth_111405	Histone H4	708.688	626.839	667.764	840.973	843.536	842.254	1.26131	0.334919	0.0491693	673.526	623.394	648.46	715.782	728.378	722.08	1.11353	0.15514	0.00297425	597.431	630.037	613.734	0.72868	-0.456643	0.00390727	458.067	458.721	458.394	0.634825	-0.65557	5.99504e-07
Mycth_111425	Ribosomal protein L2	462.218	456.014	459.116	504.13	493.256	498.693	1.0862	0.119294	0.429427	408.836	343.532	376.184	405.975	401.018	403.496	1.0726	0.101117	0.0130856	710.098	726.116	718.107	1.43998	0.526046	0.216502	780.095	725.978	753.037	1.86628	0.900164	0.00557109
Mycth_111604	Haloacid dehalogenase-like hydrolase	32.7135	28.4577	30.5856	35.8065	40.9628	38.3847	1.25499	0.327678	0.0810113	37.7317	30.5026	34.1171	31.8963	30.6092	31.2528	0.916043	-0.126514	0.547027	52.3317	47.2324	49.782	1.29692	0.375095	0.589769	59.3797	41.045	50.2123	1.60665	0.684059	0.147506
Mycth_111645		108.248	185.064	146.656	192.786	196.575	194.681	1.32746	0.408672	0.480554	52.0538	111.958	82.006	233.455	267.399	250.427	3.05377	1.61059	1.7433e-07	24.9454	29.8603	27.4029	0.140758	-2.82871	2.6595e-40	32.7036	56.7107	44.7072	0.178524	-2.48581	3.50164e-27
Mycth_111741	Fungal specific transcription factor	16.5042	15.5726	16.0384	9.97108	11.3543	10.6627	0.66482	-0.588964	0.0921438	18.4538	15.6255	17.0397	12.6207	13.6982	13.1594	0.772283	-0.372799	0.620836	6.64439	6.09938	6.37189	0.597588	-0.742776	0.000709202	8.75266	9.43142	9.09204	0.690913	-0.533423	0.000648473
Mycth_111770	Cytochrome c oxidase, subunit VIIa, fungal	1560.88	2071.38	1816.13	1696.87	1733.37	1715.12	0.94438	-0.0825604	0.981	1899.09	1815.72	1857.4	2173.18	2475.95	2324.56	1.25151	0.323672	0.000376763	1845.26	1785.9	1815.58	1.05858	0.0821236	0.682444	1689.66	1866.94	1778.3	0.765006	-0.386457	0.00156067
Mycth_111814	Cytidyltransferase-related	161.77	171.799	166.785	168.814	166.502	167.658	1.00524	0.00753434	0.753931	178.017	200.526	189.271	158.137	150.817	154.477	0.816168	-0.293062	0.957998	63.8591	115.774	89.8167	0.535714	-0.900465	0.00467357	156.834	215.045	185.94	1.20367	0.26744	0.930502
Mycth_111845		0.449864	0.740802	0.595333	7.15147	6.1833	6.66739	11.1994	3.48535	1.19e-25	0.319651	0.343523	0.331587	4.88336	5.367	5.12518	15.4565	3.95014	1.5786e-29	2.55295	2.77899	2.66597	0.399852	-1.32246	4.36623e-06	0.947987	0.38663	0.667308	0.130202	-2.94118	4.23591e-16
Mycth_111934	Thiolase-like	24.7977	21.3446	23.0712	28.7318	30.3014	29.5166	1.27937	0.355436	0.0598637	27.1729	20.7224	23.9477	37.3759	36.6603	37.0181	1.54579	0.628343	3.8684e-09	67.7739	46.552	57.163	1.93664	0.953555	0.00135663	84.8714	52.1686	68.52	1.85099	0.888296	0.115641
Mycth_111987	Ubiquitin-conjugating enzyme, E2	167.445	158.102	162.774	125.457	137.452	131.454	0.80759	-0.308304	0.598226	171.695	160.311	166.003	159.072	153.762	156.417	0.942254	-0.0858117	0.320441	152.166	130.711	141.439	1.07595	0.105614	0.772156	186.339	192.687	189.513	1.21159	0.276896	0.885793
Mycth_112014	Alcohol dehydrogenase, zinc-containing, conserved site	36.5631	29.8986	33.2308	58.7975	60.0815	59.4395	1.78869	0.8389	5.66e-06	26.677	25.0165	25.8467	41.9496	38.7851	40.3674	1.5618	0.643208	2.00476e-08	30	19.7755	24.8877	0.418707	-1.25599	1.58754e-09	37.8653	35.4559	36.6606	0.908174	-0.13896	0.0584362
Mycth_112025	Glutathione S-transferase, N-terminal	118.443	117.06	117.752	37.3386	36.574	36.9563	0.31385	-1.67185	1.02e-13	51.3081	62.4093	56.8587	10.2616	10.4537	10.3577	0.182165	-2.45668	1.17685e-06	27.5174	18.3743	22.9458	0.620891	-0.687588	0.00104816	56.1947	55.2694	55.7321	5.38076	2.42781	1.0954e-18
Mycth_112050	xylanase	1.07623	1.1457	1.11096	9.25798	7.7726	8.51529	7.66479	2.93825	5.86e-22	1.38196	1.59384	1.4879	4.85513	3.16726	4.01119	2.69588	1.43075	0.00162221	4.40964	2.66628	3.53796	0.415483	-1.26714	9.61938e-06	6.27414	3.86366	5.0689	1.26369	0.33764	1
Mycth_112051	Cytochrome P450	1.80459	1.53758	1.67109	1.19277	1.32241	1.25759	0.752557	-0.410126	0.758982	1.6424	1.71121	1.6768	0.789796	0.901987	0.845891	0.504467	-0.987169	0.18856	3.64182	2.39921	3.02052	2.40183	1.26413	0.01844	2.48399	1.79488	2.13944	2.52921	1.33869	0.0788508
Mycth_112080		8.9486	9.5223	9.23545	2.80768	2.64963	2.72865	0.295454	-1.75899	2.51e-07	2.79892	3.40466	3.10179	3.14279	2.71635	2.92957	0.944478	-0.0824115	0.725935	4.37715	4.1187	4.24792	1.55679	0.63857	0.382267	2.37417	3.77791	3.07604	1.05	0.0703864	0.705977
Mycth_112086	Heat shock protein DnaJ, cysteine-rich region	30.1664	42.7762	36.4713	41.39	58.8197	50.1049	1.37382	0.45819	0.432046	31.5025	32.2497	31.8761	55.4629	67.173	61.3179	1.92363	0.943834	2.37456e-06	15.0413	12.0782	13.5598	0.270628	-1.88562	1.08831e-05	18.6967	29.4161	24.0564	0.392323	-1.34989	2.22868e-06
Mycth_112089	Glycoside Hydrolase Family 61A protein	0.15125	0	0.0756252	124.228	122.478	123.353	1631.12	10.6716	8.37e-177	0.312642	0.0615985	0.18712	3.69594	3.827	3.76147	20.1019	4.32926	3.94351e-14	172.214	118.426	145.32	1.17808	0.236438	0.884455	29.2478	15.3588	22.3033	5.92941	2.56789	0.00131289
Mycth_112121	Thiamine pyrophosphate enzyme, C-terminal TPP-binding	3510.28	4230.61	3870.44	2080.57	2086.33	2083.45	0.538297	-0.893525	0.111685	3455.01	3703.99	3579.5	2553.67	2675.58	2614.62	0.730443	-0.453157	0.419382	2096.97	2465.33	2281.15	1.09489	0.130786	0.823656	2553.31	3767.1	3160.2	1.20867	0.273415	0.949493
Mycth_112136	Histone H2B	447.658	489.597	468.627	446.726	458.029	452.377	0.965324	-0.0509155	0.910253	395.624	374.182	384.903	414.76	461.374	438.067	1.13812	0.186656	0.00144296	333.983	324.284	329.133	0.727564	-0.458854	0.00438306	302.097	350.067	326.082	0.744365	-0.425917	0.00108704
Mycth_112137	Histone H2A	1203.59	1248.81	1226.2	1157.4	1151.27	1154.33	0.941388	-0.0871384	0.962235	1126.57	1106.76	1116.66	1055.32	1084.39	1069.85	0.958082	-0.0617795	0.198592	920.824	933.712	927.268	0.803295	-0.315999	0.0275338	945.822	995.52	970.671	0.907294	-0.140358	0.0280357
Mycth_112159	Squalene/phytoene synthase	28.5534	23.8625	26.2079	28.9353	29.6965	29.3159	1.11859	0.16168	0.372008	28.9029	23.7896	26.3463	25.0794	25.6497	25.3646	0.962738	-0.0547851	0.291893	30.9536	22.8557	26.9046	0.917749	-0.123828	0.261529	41.4686	29.051	35.2598	1.39012	0.475209	0.602176
Mycth_112204	ATPase, F0 complex, subunit C	677.11	807.876	742.493	228.509	222.047	225.278	0.303407	-1.72067	0.000838998	754.436	749.407	751.921	319.085	350.686	334.885	0.445373	-1.16691	5.62419e-10	1212.39	1138.16	1175.28	5.21701	2.38322	9.97309e-24	1621.85	1540.05	1580.95	4.72088	2.23905	5.64498e-24
Mycth_112227	D-xylulose 5-phosphate/D-fructose 6-phosphate phosphoketolase	1450.42	3310.92	2380.67	2013.37	2082.56	2047.97	0.860247	-0.217178	0.986724	1234.79	1736.46	1485.62	3062.96	3309.96	3186.46	2.14486	1.10089	1.04124e-08	2033.5	3933.8	2983.65	1.45688	0.542885	0.781052	1183.66	4252.65	2718.15	0.853032	-0.229329	0.623631
Mycth_112306	Methionine synthase, vitamin-B12 independent	22.0793	19.2882	20.6838	26.3385	25.3473	25.8429	1.24943	0.321269	0.0947753	24.3654	23.3484	23.8569	23.0381	22.4537	22.7459	0.953429	-0.0688019	0.322032	10.9065	6.61967	8.7631	0.339091	-1.56025	1.49325e-12	23.8876	23.827	23.8573	1.04886	0.0688262	0.336804
Mycth_112322	Globin, subset	108.309	120.499	114.404	730.779	708.656	719.718	6.29099	2.65329	3.5e-49	87.825	94.0555	90.9402	233.065	236.651	234.858	2.58255	1.3688	7.0811e-37	35.5293	41.5838	38.5566	0.0535718	-4.22238	1.19071e-77	68.9787	74.4832	71.7309	0.305423	-1.71112	6.31092e-26
Mycth_112329	Sterol desaturase	405.701	409.078	407.39	444.918	464.996	454.957	1.11676	0.159322	0.312316	327.102	288.919	308.011	373.872	368.267	371.07	1.20473	0.268709	0.000106783	319.679	267.68	293.68	0.645511	-0.631487	0.000252902	247.837	240.224	244.031	0.657641	-0.604628	2.52703e-06
Mycth_112362	Regulator of G protein signalling superfamily	7.79882	5.57256	6.68569	1.06002	1.15381	1.10691	0.165564	-2.59454	4.19e-18	0.663315	0.237618	0.450467	0.0219342	0.10855	0.065242	0.144832	-2.78755	0.10587	0.575836	0.640751	0.608294	0.549542	-0.863699	0.0640139	0.115717	0.0411439	0.0784306	1.20215	0.265616	1
Mycth_112363	Peptidase C14, caspase catalytic	72.5668	61.1943	66.8805	90.2258	90.4817	90.3537	1.35097	0.433998	0.0141448	76.555	72.26	74.4075	64.971	63.5004	64.2357	0.863296	-0.212073	0.832735	131.624	143.014	137.319	1.51979	0.603874	0.143037	75.7521	78.4143	77.0832	1.20001	0.263041	0.848497
Mycth_112399	Carbohydrate-Binding Module Family 1 protein	3.15766	3.55429	3.35598	4.94711	4.90614	4.92663	1.46802	0.553867	0.115118	3.75925	2.58827	3.17376	2.74983	3.79255	3.27119	1.0307	0.0436222	0.542986	5.6806	3.75553	4.71806	0.957666	-0.062406	0.622217	6.77793	4.5239	5.65092	1.72748	0.788669	0.315438
Mycth_112411	Cytochrome b5	60.6119	59.8446	60.2282	53.3728	51.3322	52.3525	0.869235	-0.202182	0.859961	68.9895	75.2598	72.1247	57.6203	57.7952	57.7078	0.800111	-0.321727	0.857886	62.6815	55.7834	59.2324	1.13142	0.17813	0.966341	77.3138	74.2701	75.7919	1.31337	0.393279	0.839284
Mycth_112442	Proteasome alpha-subunit, conserved site	127.056	117.697	122.376	101.617	95.5563	98.5868	0.805605	-0.311856	0.565782	130.977	123.238	127.108	99.4067	103.917	101.662	0.799811	-0.322269	0.770663	135.776	121.134	128.455	1.30296	0.381795	0.532871	163.937	166.079	165.008	1.6231	0.698755	0.10668
Mycth_112471	Oxidoreductase, N-terminal	28.5259	23.4537	25.9898	54.354	56.2137	55.2839	2.12713	1.08891	1.49e-09	27.8458	29.4059	28.6259	45.4967	43.4544	44.4756	1.55369	0.635694	6.8489e-10	20.1955	12.8413	16.5184	0.298792	-1.74279	1.1832e-16	37.057	35.25	36.1535	0.812885	-0.298876	0.00488258
Mycth_112491	Sugar transporter	291.137	470.055	380.596	298.906	310.134	304.52	0.800114	-0.321723	0.906278	248.443	291.607	270.025	507.882	554.252	531.067	1.96673	0.9758	1.52908e-11	94.2056	137.562	115.884	0.380546	-1.39386	1.73484e-13	393.412	734.554	563.983	1.06198	0.0867579	0.775252
Mycth_112498	MFS general substrate transporter	29.0256	24.4023	26.714	36.5084	37.5518	37.0301	1.38617	0.471104	0.0122131	31.5401	33.9913	32.7657	54.2787	55.3246	54.8017	1.67253	0.742033	3.09233e-12	70.9373	65.481	68.2091	1.84199	0.881267	0.00530666	81.7713	81.3976	81.5844	1.48872	0.574075	0.324536
Mycth_112612	Coproporphyrinogen III oxidase	1087.13	1368.4	1227.77	1084.22	1090.82	1087.52	0.885773	-0.174991	0.972119	1462.59	1564.42	1513.51	1263.82	1312.23	1288.03	0.851021	-0.232734	0.910034	1003.66	913.15	958.404	0.881271	-0.182342	0.121932	1215.81	1433.02	1324.42	1.02825	0.0401948	0.318345
Mycth_112686	Heat shock protein Hsp70	1019.48	1083.08	1051.28	3240	3281.59	3260.8	3.10174	1.63308	1.13e-21	727.22	1073.72	900.471	2143.7	2186.31	2165	2.4043	1.26562	1.01054e-12	384.359	589.446	486.903	0.14932	-2.74352	4.99182e-41	440.883	620.551	530.717	0.245135	-2.02835	2.78798e-35
Mycth_112699	Transferase	421.801	412.291	417.046	664.214	655.582	659.898	1.58232	0.662038	7.76e-05	318.773	306.274	312.524	347.317	331.882	339.599	1.08664	0.119869	0.00704614	27.3264	22.7535	25.0399	0.0379452	-4.71994	5.25e-90	23.7114	25.0405	24.376	0.0717786	-3.8003	7.96876e-88
Mycth_112700	Histone H2A	238.437	218.79	228.613	251.169	252.903	252.036	1.10246	0.140721	0.378958	253.681	224.839	239.26	234.128	228.057	231.093	0.965865	-0.0501071	0.196922	260.275	226.014	243.144	0.964719	-0.0518188	0.356543	268.644	226.284	247.464	1.07084	0.0987472	0.354796
Mycth_112714	Pyridine nucleotide-disulphide oxidoreductase, class-II	0.0666618	0	0.0333309	0.0378472	0.10228	0.0700633	2.10205	1.0718	0.931894	0.0344484	0	0.0172242	0	0	0	0	#NUM!	1	0.0328958	0.0406713	0.0367835	0.525004	-0.9296	0.87797	0	0	0	#DIV/0!	#DIV/0!	NA
Mycth_112716	PaaX-like, N-terminal	26.7108	20.4945	23.6027	17.8858	17.8167	17.8512	0.756322	-0.402928	0.410353	25.1515	23.267	24.2093	16.5898	20.1415	18.3656	0.758621	-0.398549	0.575924	19.1238	16.0679	17.5958	0.985695	-0.0207867	0.531145	41.9015	29.7525	35.827	1.95076	0.964039	0.0111723
Mycth_112802	Crotonase, core	64.4967	65.8074	65.152	557.255	545.446	551.35	8.46252	3.08109	6.51e-61	101.527	103.618	102.572	571.257	557.533	564.395	5.5024	2.46006	1.1724e-92	46.0848	42.0924	44.0886	0.0799648	-3.64449	4.98069e-60	37.7964	43.4031	40.5997	0.071935	-3.79716	5.58787e-87
Mycth_112805	Condensation domain	40.2008	38.4378	39.3193	467.1	444.324	455.712	11.59	3.53481	3.82e-79	56.5278	67.0161	61.7719	433.069	403.24	418.155	6.76933	2.75901	4.13186e-120	21.9069	19.3488	20.6279	0.0452651	-4.46546	1.39013e-84	18.0433	23.5366	20.79	0.0497183	-4.33008	3.74232e-111
Mycth_112815	Cytochrome P450	5.71957	4.28569	5.00263	10.7212	11.4841	11.1026	2.21936	1.15014	1.24e-06	3.75322	3.43858	3.5959	7.61103	8.07372	7.84237	2.18092	1.12494	1.62046e-08	0.477875	0.184635	0.331255	0.0298357	-5.06682	2.48069e-40	0.270089	0.128042	0.199065	0.0253833	-5.29998	1.0594e-37
Mycth_112824	NmrA-like	1.32003	0.978174	1.1491	1.57383	2.02532	1.79958	1.56608	0.647154	0.241316	1.56892	1.16927	1.3691	1.11656	1.5472	1.33188	0.972814	-0.0397643	0.788997	2.73587	2.25503	2.49545	1.38669	0.47164	0.678592	3.7307	1.85007	2.79039	2.09508	1.067	0.298432
Mycth_112826		34.5208	21.732	28.1264	24.9206	23.4442	24.1824	0.859774	-0.21797	0.829831	35.4929	30.8193	33.1561	22.2103	18.9531	20.5817	0.620751	-0.687914	0.0110822	49.0833	34.0611	41.5722	1.71911	0.781663	0.0178696	50.1304	36.2712	43.2008	2.09899	1.0697	0.00090234
Mycth_112850	Tetratricopeptide region	30.5567	25.7403	28.1485	22.102	21.7179	21.91	0.77837	-0.361472	0.445221	44.4907	33.3701	38.9304	23.9461	25.2192	24.5827	0.631451	-0.663256	0.00961776	31.5765	21.8787	26.7276	1.21988	0.286742	0.7642	48.9876	36.3288	42.6582	1.7353	0.795182	0.041779
Mycth_112889	Appr-1-p processing	105.134	104.489	104.811	77.9816	77.9314	77.9565	0.743778	-0.427056	0.273344	106.42	109.305	107.863	100.794	107.43	104.112	0.965226	-0.0510617	0.209121	132.056	115.971	124.014	1.59081	0.669758	0.0630299	66.4578	59.8699	63.1638	0.606693	-0.720962	5.36513e-07
Mycth_112905	ATPase, P-type, K/Mg/Cd/Cu/Zn/Na/Ca/Na/H-transporter	64.4412	37.453	50.9471	109.52	102.211	105.866	2.07795	1.05516	1.22e-09	55.311	38.1445	46.7277	85.8297	74.4764	80.1531	1.71532	0.778478	3.76482e-09	17.7056	11.8688	14.7872	0.139679	-2.83981	5.05359e-40	20.0352	18.0851	19.0602	0.237797	-2.0722	7.44905e-34
Mycth_112916	Glycosyltransferase Family 2 protein	326.835	303.945	315.39	287.106	290.123	288.615	0.915104	-0.127992	1	314.054	287.888	300.971	317.483	313.92	315.701	1.04894	0.068934	0.0212849	284.381	264.972	274.676	0.951707	-0.071411	0.294818	198.353	229.665	214.009	0.677885	-0.560888	5.71093e-06
Mycth_112924	Transglutaminase-like	17.0714	10.0575	13.5645	10.2505	10.7194	10.4849	0.772971	-0.371515	0.626297	28.1284	17.9092	23.0188	11.8444	10.2766	11.0605	0.480497	-1.0574	0.0229217	42.2317	30.4832	36.3574	3.46759	1.79393	1.74392e-11	32.9939	20.6575	26.8257	2.42537	1.27821	0.00791867
Mycth_112996	Pyridoxal phosphate-dependent decarboxylase	26.0059	27.9799	26.9929	17.0292	16.1225	16.5758	0.614081	-0.7035	0.0602167	30.2375	34.0098	32.1237	21.0423	19.6684	20.3553	0.633656	-0.658229	0.150023	33.3771	33.1331	33.2551	2.00624	1.0045	0.00152171	70.2154	68.8572	69.5363	3.41612	1.77236	3.6207e-12
Mycth_113066		24.6771	18.6111	21.6441	21.5815	21.1994	21.3905	0.988283	-0.0170036	0.844697	23.7029	23.9655	23.8342	21.5297	20.1768	20.8533	0.874931	-0.192758	0.742628	26.1812	19.011	22.5961	1.05636	0.0791069	0.743854	24.8027	18.2731	21.5379	1.03283	0.046604	0.271642
Mycth_113138	DNA-binding SAP	18.1308	12.8509	15.4908	11.9656	11.0775	11.5215	0.743763	-0.427084	0.330467	21.0526	16.5322	18.7924	12.4335	11.6816	12.0576	0.641619	-0.64021	0.0449689	19.5994	13.8087	16.7041	1.44981	0.535868	0.239488	21.3341	17.3247	19.3294	1.60309	0.680857	0.197481
Mycth_113236	Aldo/keto reductase	59.0684	57.9772	58.5228	58.1645	59.7506	58.9576	1.00743	0.010678	0.769812	76.4919	70.1722	73.3321	66.0388	62.132	64.0854	0.873907	-0.194448	0.773637	47.6517	37.0356	42.3436	0.718206	-0.477531	0.00794188	64.1323	57.4427	60.7875	0.948539	-0.0762205	0.0976043
Mycth_113239	Protein of unknown function, ATP binding	47.3765	38.2911	42.8338	38.9948	41.3351	40.1649	0.937692	-0.0928139	0.983624	50.7382	43.2722	47.0052	43.5542	43.0517	43.3029	0.921238	-0.118355	0.469392	60.3557	56.0603	58.208	1.44922	0.535281	0.22025	85.4299	82.1047	83.7673	1.93445	0.951922	0.00381451
Mycth_113387		16.1291	15.7732	15.9512	92.4146	105.056	98.7352	6.18985	2.6299	2.27e-35	15.7118	15.2893	15.5006	26.3449	25.0409	25.6929	1.65755	0.72905	2.75142e-05	8.96559	5.6555	7.31055	0.0740419	-3.75551	6.21566e-46	16.9138	18.6296	17.7717	0.691696	-0.53179	0.00508312
Mycth_113450	chitinase	0.560357	0.414881	0.487619	24.238	23.3668	23.8024	48.8135	5.60921	6.69e-111	3.47486	3.51871	3.49679	49.7352	45.0663	47.4008	13.5555	3.76081	5.09557e-149	211.313	214.559	212.936	8.946	3.16124	1.46817e-27	120.441	130.703	125.572	2.64916	1.40554	5.68162e-05
Mycth_113457	ATPase, F1/V1/A1 complex, alpha/beta subunit, nucleotide-binding	182.93	152.884	167.907	94.9889	93.218	94.1034	0.56045	-0.835343	0.000325069	171.087	154.704	162.895	107.222	97.4496	102.336	0.628232	-0.670632	0.00322652	89.0511	80.7442	84.8977	0.902174	-0.148523	0.171527	80.9597	87.0308	83.9953	0.820779	-0.284934	0.00318223
Mycth_113577	Aldehyde dehydrogenase, conserved site	0.380078	0.455188	0.417633	0.588515	0.282742	0.435629	1.04309	0.0608629	0.982174	0.214266	0.211079	0.212673	0.194844	0.192852	0.193848	0.911486	-0.133707	1	0.341015	0.590269	0.465642	1.0689	0.0961207	0.979953	0.651023	0.657875	0.654449	3.37609	1.75535	0.287862
Mycth_113600	3-oxo-5-alpha-steroid 4-dehydrogenase, C-terminal	36.5899	20.8379	28.7139	778.363	784.516	781.439	27.2147	4.76631	7.41e-122	12.7677	7.76228	10.265	327.124	324.174	325.649	31.7243	4.98752	7.27624e-248	14.8629	19.1417	17.0023	0.0217577	-5.52233	2.02301e-112	1.40005	1.12004	1.26005	0.00386933	-8.0137	4.96766e-209
Mycth_113715	Dynamin, GTPase region	22.8187	16.0811	19.4499	16.2535	15.8276	16.0405	0.824708	-0.278044	0.656226	26.035	22.9011	24.4681	18.3116	15.4536	16.8826	0.689985	-0.535362	0.0919409	21.3247	15.5284	18.4266	1.14875	0.200065	0.98404	27.6431	21.1198	24.3815	1.44418	0.530248	0.432573
Mycth_113886	WD40 repeat	143.865	144.2	144.032	109.256	104.107	106.682	0.740679	-0.433081	0.238131	163.087	159.458	161.272	125.601	127.162	126.382	0.783654	-0.351712	0.63595	85.8436	91.8559	88.8497	0.832849	-0.263874	0.0558738	148.524	149.142	148.833	1.17765	0.23591	0.762274
Mycth_113912		35.5383	30.3734	32.9558	26.5828	26.2266	26.4047	0.801214	-0.31974	0.583605	41.094	40.3659	40.7299	33.5274	31.8271	32.6773	0.802291	-0.317803	0.826049	33.2406	22.3007	27.7706	1.05173	0.0727662	0.757791	33.5334	28.0862	30.8098	0.942851	-0.084898	0.104517
Mycth_113985	Thioredoxin-like fold	339.662	356.288	347.975	262.497	275.649	269.073	0.773254	-0.370985	0.460988	287.482	331.24	309.361	323.303	331.915	327.609	1.05899	0.082684	0.126854	128.625	133.637	131.131	0.487343	-1.03699	2.58036e-08	164.975	209.506	187.24	0.571536	-0.807084	2.49e-08
Mycth_114008	Opsin	52.3119	40.0619	46.1869	55.1422	53.0306	54.0864	1.17103	0.227783	0.199162	58.8186	45.7788	52.2987	46.8856	43.0419	44.9638	0.85975	-0.218011	0.892175	64.2813	69.9446	67.113	1.24085	0.311325	0.757429	71.478	58.0579	64.7679	1.44045	0.526517	0.426681
Mycth_114083		0.979352	0.528761	0.754057	0.747445	0.574775	0.66111	0.876737	-0.189784	0.960731	1.04537	0.666934	0.856153	0.633744	0.537656	0.5857	0.684107	-0.547707	0.647601	1.3627	1.0579	1.2103	1.83071	0.872402	0.216106	1.09855	0.645332	0.871942	1.48872	0.57407	0.772928
Mycth_114107	Sugar transporter, conserved site	0.924766	1.01522	0.969994	116.033	109.306	112.669	116.155	6.8599	7.57e-166	0.955769	0.847399	0.901584	172.234	163.677	167.955	186.289	7.5414	0	2.48455	2.5703	2.52743	0.0224323	-5.47828	4.79906e-99	2.67473	3.07042	2.87258	0.0171032	-5.86959	5.1656e-149
Mycth_114166	AP endonuclease, family 2	45.6196	44.7292	45.1744	33.7915	35.4845	34.638	0.766762	-0.38315	0.401127	55.461	61.0099	58.2354	43.6443	41.4465	42.5454	0.730576	-0.452894	0.469204	48.1492	35.9712	42.0602	1.21428	0.280098	0.799059	50.8523	36.4284	43.6403	1.02574	0.0366595	0.258978
Mycth_114237	Short-chain dehydrogenase/reductase SDR	89.8362	74.735	82.2856	81.0618	80.2956	80.6787	0.980471	-0.0284528	0.86183	103.056	80.3896	91.7229	74.4464	72.7015	73.5739	0.802132	-0.318088	0.7521	76.6956	71.2757	73.9856	0.917041	-0.124942	0.216947	75.9167	82.9708	79.4438	1.07978	0.110739	0.395373
Mycth_114376	Peptidase M49, dipeptidyl-peptidase III	50.8445	36.2521	43.5483	50.4102	49.9842	50.1972	1.15268	0.204991	0.259155	45.661	35.5653	40.6132	34.7938	35.83	35.3119	0.869469	-0.201794	0.833936	38.9139	25.8923	32.4031	0.645516	-0.631475	0.000632617	43.8327	42.5478	43.1902	1.22311	0.290552	0.929412
Mycth_114482	Cytochrome b5	35.3966	29.9869	32.6918	25.2146	26.6332	25.9239	0.79298	-0.334643	0.533399	39.0205	40.486	39.7533	21.027	20.6475	20.8372	0.524164	-0.931911	0.000113064	37.9164	31.5023	34.7093	1.33889	0.421039	0.455093	48.2796	45.3142	46.7969	2.24583	1.16725	0.000127421
Mycth_114497	beta-galactosidase/glucoronidase	2.99456	2.85757	2.92606	4.36809	4.17045	4.26927	1.45905	0.545028	0.0671005	2.2617	2.22337	2.24253	4.96203	5.63128	5.29666	2.36191	1.23995	6.29656e-09	2.61445	1.4054	2.00992	0.470789	-1.08685	0.000490977	2.94674	2.46094	2.70384	0.51048	-0.970073	6.52678e-05
Mycth_114666	Alcohol dehydrogenase, zinc-binding	0	0	0	0.0478759	0	0.0239379	#DIV/0!	#DIV/0!	1	0.0435764	0.051514	0.0475452	0	0	0	0	#NUM!	0.892232	0.0416124	0	0.0208062	0.869174	-0.202284	1	0.0418112	0.0891971	0.0655042	#DIV/0!	#DIV/0!	0.840018
Mycth_114667	Hypothetical protein	0	0.109554	0.0547771	0.0755431	0	0.0377716	0.68955	-0.536274	1	0.137518	0.0406419	0.08908	0.0375159	0	0.018758	0.210574	-2.2476	0.741862	0.0984901	0.0811802	0.0898352	2.37838	1.24998	0.866521	0.131947	0.140744	0.136346	7.26868	2.86169	0.609722
Mycth_114678	Sugar transporter	62.0805	55.1024	58.5914	47.886	47.7378	47.8119	0.816022	-0.29332	0.62169	46.4941	40.6727	43.5834	24.1156	23.6554	23.8855	0.548041	-0.867643	4.44671e-05	56.1122	45.5729	50.8426	1.06339	0.0886666	0.744346	34.4546	28.4293	31.4419	1.31636	0.396555	0.835571
Mycth_114691	Aromatic-ring hydroxylase	46.3677	66.2489	56.3083	33.2232	29.1987	31.211	0.554287	-0.851295	0.386478	44.1743	41.9962	43.0852	27.0209	25.5337	26.2773	0.609891	-0.713376	0.00671343	22.7894	37.7447	30.267	0.969756	-0.0443065	0.688995	15.1835	26.7853	20.9844	0.798575	-0.3245	0.211828
Mycth_114710		6.86414	4.78218	5.82316	5.24611	5.43462	5.34036	0.91709	-0.124865	1	9.24301	5.08029	7.16165	5.62	5.4152	5.5176	0.770437	-0.376251	0.817595	21.5287	12.8053	17.167	3.21458	1.68463	0.000334589	15.5446	9.59944	12.572	2.27853	1.1881	0.0180665
Mycth_114734	Mitochondrial substrate carrier	32.4469	31.0884	31.7676	27.331	29.663	28.497	0.897045	-0.156747	0.960299	41.1572	31.93	36.5436	35.2379	35.4816	35.3597	0.967604	-0.0475107	0.249978	23.1027	18.3168	20.7097	0.726733	-0.460502	0.00875178	41.3581	32.7738	37.0659	1.04825	0.0679864	0.314047
Mycth_114738	GCN5-related N-acetyltransferase	52.3372	46.1043	49.2207	39.1199	38.9094	39.0147	0.792647	-0.33525	0.548654	60.2535	59.9483	60.1009	46.2335	45.9964	46.1149	0.767292	-0.382152	0.57934	46.0824	33.6699	39.8761	1.02208	0.031509	0.642709	66.6547	61.9458	64.3002	1.39435	0.47959	0.610284
Mycth_114796	Tetratricopeptide TPR-3	26.2336	18.9292	22.5814	25.5366	30.1511	27.8438	1.23304	0.302225	0.112555	20.7785	15.0935	17.936	19.285	19.221	19.253	1.07343	0.102229	0.0598713	38.766	43.2148	40.9904	1.47215	0.557927	0.316965	32.9914	31.9366	32.464	1.68618	0.753757	0.0835637
Mycth_114955		66.9649	48.7998	57.8824	49.2668	52.8905	51.0786	0.882455	-0.180405	0.903775	74.0703	64.8919	69.4811	50.8532	48.4568	49.655	0.714655	-0.484681	0.16967	52.3559	36.5331	44.4445	0.870119	-0.200715	0.135359	66.0687	59.0841	62.5764	1.26022	0.333679	0.999036
Mycth_115028		2.14895	3.02266	2.5858	0.915047	1.16774	1.04139	0.402734	-1.3121	0.144399	3.05387	2.8717	2.96278	2.49935	1.87409	2.18672	0.738062	-0.438186	0.751082	10.505	6.88329	8.69417	8.3486	3.06153	2.35047e-14	3.6294	3.72928	3.67934	1.68259	0.750681	0.42143
Mycth_115052	Nucleolar RNA-binding protein Nop10p	379.247	362.141	370.694	362.733	370.416	366.574	0.988887	-0.0161224	0.823867	492.188	413.61	452.899	379.135	362.304	370.72	0.818548	-0.288861	0.893516	470.782	401.562	436.172	1.18986	0.25079	0.887507	577.195	462.535	519.865	1.40231	0.487809	0.549182
Mycth_115096	Polyprenyl synthetase	107.112	112.763	109.938	96.1387	91.0995	93.6191	0.851567	-0.231808	0.805673	113.543	116.975	115.259	100.017	96.3521	98.1845	0.85186	-0.231312	0.892232	107.09	69.4253	88.2577	0.942732	-0.0850804	0.345248	183.514	144.553	164.034	1.67067	0.740424	0.0666325
Mycth_115110		43.4294	44.513	43.9712	35.1308	44.6192	39.875	0.906842	-0.141076	1	54.4186	40.8526	47.6356	42.4784	42.4732	42.4758	0.891682	-0.165399	0.822828	58.0349	48.0696	53.0523	1.33047	0.411931	0.608317	71.2704	71.5498	71.4101	1.6812	0.749488	0.193134
Mycth_115198	WD40 repeat	259.304	253.027	256.165	260.736	252.495	256.615	1.00176	0.00253307	0.774371	285.741	324.856	305.299	286.059	293.726	289.892	0.949537	-0.0747037	0.448981	132.071	167.884	149.977	0.584443	-0.774865	1.21894e-05	130.879	148.417	139.648	0.481723	-1.05372	8.91929e-13
Mycth_115501	Phosphopantetheine attachment site	42.1509	10.4297	26.2903	6.31702	5.62035	5.96868	0.22703	-2.13905	0.357322	9.9413	4.85613	7.39871	1.03283	0.709331	0.87108	0.117734	-3.0864	0.00152146	2.69918	1.99927	2.34922	0.393592	-1.34523	9.11599e-10	1.28499	1.18614	1.23557	1.41843	0.504297	0.709077
Mycth_115624	Phosphatidylinositol 3- and 4-kinase, catalytic	0.41129	0.209862	0.310576	0.368353	0.30219	0.335271	1.07952	0.110384	0.852709	0.389157	0.311413	0.350285	0.235195	0.213392	0.224294	0.640318	-0.643141	0.510836	0.634608	0.572553	0.60358	1.80027	0.848217	0.175832	0.654873	0.765932	0.710402	3.16729	1.66325	0.00413767
Mycth_115754		0.251703	0.0690808	0.160392	0.571616	0.772378	0.671997	4.18972	2.06685	0.221512	0.520283	0.230645	0.375464	0.354842	0.280972	0.317907	0.846704	-0.240071	1	0.372625	0	0.186313	0.277252	-1.85073	0.235134	0.312004	0.133122	0.222563	0.700089	-0.51439	0.808106
Mycth_115802	Zinc finger, C2H2-type	91.8631	83.1754	87.5193	79.4354	78.6574	79.0464	0.903189	-0.146901	0.965608	96.6802	85.6554	91.1678	71.5613	74.4299	72.9956	0.800673	-0.320715	0.7545	81.0066	72.3225	76.6645	0.969868	-0.0441401	0.372172	73.7502	61.6382	67.6942	0.927374	-0.108776	0.0491129
Mycth_115858	Amino acid transporter, transmembrane	49.6657	52.8485	51.2571	60.9187	62.8634	61.891	1.20746	0.271978	0.113968	54.5877	54.9179	54.7528	62.9203	65.6177	64.269	1.1738	0.231192	0.000630223	28.3424	19.8304	24.0864	0.389174	-1.36151	9.9784e-12	33.5091	33.8982	33.7036	0.524415	-0.93122	4.58761e-10
Mycth_115886		17.5121	10.9596	14.2358	14.5823	14.3057	14.444	1.01462	0.0209423	0.801506	17.3112	14.4096	15.8604	12.4414	13.8302	13.1358	0.828213	-0.271926	0.971833	13.8503	11.3967	12.6235	0.87396	-0.19436	0.188283	15.4758	14.7686	15.1222	1.15122	0.203167	0.724582
Mycth_115909	Bromodomain	69.5272	43.5989	56.563	58.3003	58.5211	58.4107	1.03267	0.0463746	0.718123	71.8479	60.3889	66.1184	60.0002	57.9124	58.9563	0.891678	-0.165405	0.62925	63.905	55.9979	59.9514	1.02638	0.0375608	0.582199	67.7261	60.1186	63.9223	1.08423	0.116673	0.399104
Mycth_115935	Glycosyltransferase Family 90 protein	111.233	103.984	107.608	81.8756	80.0444	80.96	0.752358	-0.41051	0.288741	112.169	91.4601	101.814	89.7947	88.7107	89.2527	0.876622	-0.189974	0.756587	95.0241	80.6934	87.8587	1.08521	0.117977	0.817335	83.2574	72.3104	77.7839	0.871502	-0.198424	0.0159762
Mycth_115944	Helicase, superfamily 1 and 2, ATP-binding	29.8541	17.5928	23.7234	40.6791	42.2136	41.4463	1.74706	0.804931	2.02e-05	30.3114	21.8852	26.0983	32.3788	25.9698	29.1743	1.11786	0.160743	0.108602	43.8759	36.089	39.9825	0.96468	-0.0518774	0.392068	50.0065	27.3573	38.6819	1.32589	0.40696	0.903796
Mycth_115957	2OG-Fe(II) oxygenase	0.465205	0.408567	0.436886	0.211296	0.0475844	0.12944	0.296279	-1.75497	0.441338	0.384641	0.227352	0.305997	0.209866	0	0.104933	0.342921	-1.54405	0.59116	0.734611	0.39736	0.565985	4.37257	2.12848	0.219104	0.138397	0	0.0691987	0.659457	-0.600649	0.928261
Mycth_115968	beta-glucosidase	13.4662	8.22753	10.8469	319.244	321.966	320.605	29.5573	4.88544	2.7e-124	14.6062	13.7495	14.1778	309.114	271.189	290.151	20.4652	4.3551	6.42426e-152	87.4913	60.2696	73.8804	0.230441	-2.11753	2.06248e-25	129.811	147.676	138.744	0.478177	-1.06438	4.79117e-13
Mycth_115983	Hypothetical protein	233.782	253.55	243.666	62.1177	69.2958	65.7068	0.269659	-1.89079	3.32e-07	88.164	99.9468	94.0554	86.0196	99.95	92.9848	0.988618	-0.0165155	0.409484	196.184	265.221	230.702	3.51109	1.81192	0.0101841	26.2567	47.5942	36.9255	0.397113	-1.33238	3.66614e-06
Mycth_116006	WD40 repeat	34.1852	30.2157	32.2005	30.0585	30.6634	30.3609	0.942873	-0.0848654	0.973587	37.5056	32.1285	34.817	31.4368	32.9745	32.2056	0.924997	-0.11248	0.512284	54.8041	51.2331	53.0186	1.74628	0.804282	0.0208682	50.0244	45.4782	47.7513	1.4827	0.568227	0.38433
Mycth_116020	Ribosomal protein L34e	484.627	471.585	478.106	539.207	529.414	534.31	1.11756	0.160347	0.322655	445.156	380.561	412.858	432.008	428.473	430.241	1.0421	0.0594975	0.0341756	675.118	692.178	683.648	1.2795	0.355576	0.622364	730.594	697.14	713.867	1.65923	0.730511	0.0666325
Mycth_116157	endoglucanase	45.3841	38.9645	42.1743	64.1728	59.2567	61.7147	1.46333	0.549251	0.00217351	44.7879	40.7373	42.7626	43.5385	41.0601	42.2993	0.989166	-0.0157154	0.160352	26.9399	21.0218	23.9808	0.388576	-1.36373	1.5297e-11	23.6568	17.8216	20.7392	0.490296	-1.02827	1.89435e-10
Mycth_116237	Aldo/keto reductase	5.50473	5.16188	5.3333	19.4897	17.8694	18.6796	3.50244	1.80836	4.66e-15	3.5558	2.94245	3.24912	14.9172	13.3991	14.1581	4.35753	2.12351	7.82226e-25	10.9034	5.73746	8.32045	0.445431	-1.16673	1.74161e-06	13.7607	10.1898	11.9753	0.845821	-0.241576	0.054304
Mycth_116261	Protein of unknown function Cys-rich	0.229979	0.441831	0.335905	0.652853	0.352858	0.502856	1.49702	0.582089	0.80836	0.23769	0.280985	0.259338	0.518747	0.256722	0.387735	1.4951	0.580238	0.69514	18.2149	56.4763	37.3456	74.267	6.21465	0.0192199	1.53941	1.15551	1.34746	3.47521	1.7971	0.209827
Mycth_116322	Peptidase C19, ubiquitin carboxyl-terminal hydrolase 2	56.0677	39.6404	47.8541	38.3627	36.5209	37.4418	0.782417	-0.353991	0.420586	63.4215	56.7594	60.0904	41.749	40.8872	41.3181	0.687599	-0.540361	0.0705528	38.1012	29.1448	33.623	0.898006	-0.155203	0.192845	52.3084	45.2318	48.7701	1.18036	0.239223	0.782596
Mycth_116348	Protein kinase, core	22.1315	12.3929	17.2622	10.6126	10.6022	10.6074	0.614488	-0.702544	0.247528	26.4773	19.0252	22.7512	11.2051	10.5929	10.899	0.479052	-1.06175	6.32833e-05	18.5269	9.51992	14.0234	1.32204	0.402766	0.677828	17.9996	11.1492	14.5744	1.33722	0.419237	0.82064
Mycth_116363	Alkaline phosphatase	2.45545	1.72872	2.09208	5.12172	4.50451	4.81311	2.30063	1.20203	6.74e-05	2.89637	2.08698	2.49167	1.65555	1.96635	1.81095	0.726801	-0.460367	0.683096	2.47607	1.85635	2.16621	0.450064	-1.1518	0.000229246	4.15532	2.59729	3.37631	1.86438	0.8987	0.226176
Mycth_116384	oligoxyloglucanase	14.5755	11.9129	13.2442	37.714	35.7412	36.7276	2.77311	1.4715	1.6e-15	14.1802	13.2799	13.7301	15.7753	13.8835	14.8294	1.08007	0.111123	0.0426104	36.5434	27.4174	31.9804	0.870747	-0.199675	0.140144	35.2514	21.9389	28.5951	1.92827	0.947307	0.0784678
Mycth_116510		40.5081	39.143	39.8255	26.0252	26.1471	26.0861	0.655011	-0.61041	0.0410612	55.0524	51.9418	53.4971	32.8638	30.4424	31.6531	0.591679	-0.757114	0.00111178	34.2005	26.3548	30.2776	1.16068	0.214968	0.963039	39.4924	39.3297	39.4111	1.24509	0.316255	0.994934
Mycth_116553	xylanase	20.5825	28.8429	24.7127	83.3121	84.1716	83.7419	3.38862	1.7607	2.19e-21	18.7282	16.4198	17.574	40.2817	44.5102	42.3959	2.41243	1.27049	2.9936e-21	9.71876	6.10648	7.91262	0.0944882	-3.40372	2.03892e-46	22.0917	16.4781	19.2849	0.454876	-1.13646	7.7674e-11
Mycth_11658	Transferase	7.72733	2.51784	5.12259	7.37207	9.05899	8.21553	1.60379	0.681481	0.338319	3.06328	2.67283	2.86806	3.97944	3.74182	3.86063	1.34608	0.428764	0.0602274	2.19391	1.37777	1.78584	0.217374	-2.20175	1.2165e-11	1.78451	0.746459	1.26548	0.327791	-1.60915	1.95435e-05
Mycth_116603		23.3469	14.5373	18.9421	19.4609	20.9084	20.1847	1.0656	0.0916633	0.623525	12.5597	7.90789	10.2338	13.9289	14.9661	14.4475	1.41175	0.497483	0.00107484	1.46661	5.52041	3.49351	0.173078	-2.53051	5.75895e-20	6.45117	4.64571	5.54844	0.38404	-1.38067	2.56025e-10
Mycth_116679		27.3818	48.9214	38.1516	29.4782	31.8199	30.649	0.803349	-0.315901	0.928406	27.7775	31.6411	29.7093	32.52	32.8926	32.7063	1.10088	0.138653	0.0485247	13.7459	25.2035	19.4747	0.635411	-0.654239	0.0652356	20.5764	34.2752	27.4258	0.838549	-0.254033	0.246625
Mycth_116881	Major facilitator superfamily	2.65191	2.75645	2.70418	1.34544	1.52942	1.43743	0.53156	-0.911696	0.108449	3.14902	3.17112	3.16007	2.38632	2.55088	2.4686	0.781184	-0.356266	0.876846	2.67297	2.92611	2.79954	1.9476	0.961696	0.129895	6.51851	5.1029	5.8107	2.35385	1.23502	0.0145356
Mycth_116885	Region of unknown function DUF1767	2.09452	1.24551	1.67001	2.72516	1.65145	2.18831	1.31035	0.389954	0.628668	2.70593	1.49278	2.09935	1.57482	2.09453	1.83467	0.873922	-0.194423	0.991946	3.96209	3.035	3.49854	1.59875	0.676941	0.368386	5.49553	4.43103	4.96328	2.70527	1.43577	0.0211394
Mycth_116956	mRNA capping enzyme, beta chain	18.5289	13.4733	16.0011	15.4303	16.4874	15.9588	0.997359	-0.00381539	0.821103	22.1357	17.8141	19.9749	16.9644	16.7719	16.8682	0.84447	-0.243882	0.990842	28.6114	24.1321	26.3717	1.65248	0.724637	0.0419882	21.9848	19.4908	20.7378	1.2294	0.297957	0.955491
Mycth_117063	NAD-dependent glycerol-3-phosphate dehydrogenase, N-terminal	0.205609	0.270865	0.238237	0.607019	0.252374	0.429696	1.80365	0.850918	0.666337	0.510006	0.25121	0.380608	0.278266	0.229518	0.253892	0.66707	-0.584091	0.894216	1.78574	0.752671	1.2692	2.95373	1.56254	0.167068	1.79427	0.782952	1.28861	5.07543	2.34353	0.051006
Mycth_117073	Acyl-CoA N-acyltransferase	6.45921	6.79961	6.62941	9.31036	8.56789	8.93912	1.3484	0.431253	0.0858566	8.44377	5.80171	7.12274	7.08519	6.58475	6.83497	0.959599	-0.059497	0.54573	376.118	707.123	541.62	60.5899	5.921	0.000182004	28.5169	46.6721	37.5945	5.50031	2.45951	0.0238955
Mycth_117145	Region of unknown function DUF1741	34.4745	24.6277	29.5511	22.4095	23.0231	22.7163	0.768712	-0.379485	0.403515	35.2172	29.4843	32.3507	22.0888	20.9427	21.5157	0.665077	-0.588406	0.0581733	26.9237	29.3248	28.1242	1.23806	0.308086	0.792219	33.4437	24.0729	28.7583	1.33662	0.418586	0.779523
Mycth_117146	Fungal transcriptional regulatory protein, N-terminal	8.39389	6.29452	7.3442	9.78052	10.6861	10.2333	1.39339	0.478594	0.0172545	6.27291	5.80621	6.03956	10.996	10.8403	10.9181	1.80777	0.854212	2.77327e-11	15.8676	16.8134	16.3405	1.5968	0.675181	0.0856822	10.2448	10.7092	10.477	0.959593	-0.0595051	0.135249
Mycth_117150	NAD-dependent epimerase/dehydratase	29.2179	24.7347	26.9763	21.3126	17.4109	19.3617	0.717731	-0.478485	0.218133	34.4778	37.2764	35.8771	21.4254	22.6484	22.0369	0.614235	-0.703137	0.0564741	13.312	9.22608	11.2691	0.582027	-0.780843	0.000567406	14.6567	14.9103	14.7835	0.67085	-0.575937	0.000344491
Mycth_117206	Chromo domain-like	25.5889	18.9888	22.2889	15.0528	15.0184	15.0356	0.674579	-0.567942	0.0912323	29.2034	23.198	26.2007	16.6485	14.4443	15.5464	0.59336	-0.753021	0.00452465	25.0724	14.8871	19.9797	1.32883	0.410157	0.537877	25.6635	19.3297	22.4966	1.44706	0.533121	0.48284
Mycth_117209	Peptidase M, neutral zinc metallopeptidases, zinc-binding site	37.5376	31.8287	34.6831	77.1974	74.9601	76.0787	2.19354	1.13326	4.75e-10	34.2069	37.3377	35.7723	65.4388	68.5602	66.9995	1.87295	0.905309	8.16844e-16	26.6992	29.8685	28.2839	0.371771	-1.42751	1.65688e-12	34.6343	27.1154	30.8748	0.460822	-1.11772	7.26068e-12
Mycth_117245	Protein kinase-like	24.8886	42.6159	33.7523	18.2783	18.6184	18.4483	0.54658	-0.871495	0.557051	38.9685	45.3859	42.1772	32.6782	35.385	34.0316	0.806871	-0.30959	0.939064	24.3804	26.1392	25.2598	1.36922	0.453353	0.497672	40.2755	60.184	50.2298	1.47597	0.561668	0.751563
Mycth_117406	NUDIX hydrolase, core	58.1311	66.5189	62.325	119.561	122.654	121.107	1.94315	0.958401	1.95e-08	61.7903	67.1615	64.4759	104.204	101.244	102.724	1.59321	0.671937	1.87106e-12	41.3121	41.8092	41.5607	0.343173	-1.54299	3.21446e-15	74.1196	84.4018	79.2607	0.771591	-0.374092	0.000699338
Mycth_117428		14.2541	6.42577	10.3399	8.7263	8.93757	8.83193	0.854158	-0.227426	0.932343	20.0633	8.84921	14.4563	8.04985	6.43985	7.24485	0.501156	-0.996669	0.361529	8.85224	4.77865	6.81545	0.771682	-0.373921	0.0794165	17.1627	9.71019	13.4364	1.85462	0.891124	0.251202
Mycth_117436	Kinetochore-Ndc80 subunit Spc25	18.9185	16.2649	17.5917	17.4443	16.7865	17.1154	0.972928	-0.0395957	0.91929	17.9037	18.3244	18.114	17.5833	15.3681	16.4757	0.909554	-0.136769	0.644433	7.37861	9.51208	8.44535	0.493435	-1.01907	2.15611e-05	20.7046	21.892	21.2983	1.29271	0.370396	0.934263
Mycth_117478	Fungal transcriptional regulatory protein, N-terminal	14.4506	13.3402	13.8954	12.7929	11.2026	11.9978	0.863433	-0.211844	0.838453	15.1859	14.7594	14.9727	12.3198	11.9229	12.1213	0.809562	-0.304787	0.878252	13.3459	9.26953	11.3077	0.942485	-0.085458	0.379776	9.99705	6.20779	8.10242	0.668444	-0.581122	0.000130574
Mycth_117495	Fungal transcriptional regulatory protein, N-terminal	37.9514	37.5595	37.7554	46.3119	45.3766	45.8443	1.21424	0.280058	0.107711	51.4707	46.9126	49.1917	53.5939	53.3624	53.4781	1.08714	0.120535	0.0103234	31.5951	26.4319	29.0135	0.632871	-0.660017	0.000234336	37.9025	54.7337	46.3181	0.866113	-0.207372	0.176007
Mycth_117620		19.784	14.4181	17.1011	13.9611	13.7768	13.869	0.811	-0.302226	0.708103	25.8768	19.5969	22.7369	21.0521	18.1543	19.6032	0.862175	-0.213948	0.929436	25.4276	11.0476	18.2376	1.31499	0.395055	0.761469	20.4503	14.0104	17.2303	0.878958	-0.186134	0.092579
Mycth_117625	B302, (SPRY)-like	20.4289	10.6284	15.5287	11.9093	12.408	12.1587	0.782982	-0.35295	0.771751	22.722	15.9475	19.3347	12.1537	11.4826	11.8182	0.61124	-0.710188	0.0395384	18.7119	14.0989	16.4054	1.34928	0.432186	0.467179	22.173	14.1724	18.1727	1.53769	0.620764	0.347416
Mycth_117681	TRASH	48.7761	40.1095	44.4428	32.4729	34.1843	33.3286	0.749922	-0.415188	0.326529	56.4684	44.095	50.2817	35.7253	31.882	33.8037	0.672286	-0.572853	0.0666142	98.8045	75.495	87.1498	2.61486	1.38674	3.00736e-07	114.173	70.1126	92.143	2.72583	1.4467	0.00383997
Mycth_11798	Mitochondrial substrate carrier	12.6734	8.01903	10.3462	9.91167	9.78778	9.84972	0.952014	-0.0709459	0.977811	14.9101	9.81703	12.3636	7.70267	7.66469	7.68368	0.621477	-0.686227	0.142895	26.3135	14.3948	20.3542	2.06647	1.04717	0.0691615	20.9702	10.0831	15.5267	2.02073	1.01488	0.309937
Mycth_12171		38.9563	24.8455	31.9009	19.4259	19.3965	19.4112	0.608484	-0.716708	0.0404355	53.2145	47.5459	50.3802	22.3164	17.8547	20.0855	0.398679	-1.3267	3.0412e-11	15.0129	8.29987	11.6564	0.600498	-0.735768	0.00135663	28.207	21.4537	24.8304	1.23623	0.305948	0.985906
Mycth_122893	Zinc finger, C2H2-type	15.7491	9.339	12.544	15.4492	15.8369	15.6431	1.24705	0.318522	0.150198	13.883	12.1828	13.0329	10.48	11.2051	10.8426	0.831939	-0.265451	0.995119	42.912	31.1573	37.0347	2.36748	1.24335	5.58081e-06	28.3442	23.9955	26.1699	2.41362	1.2712	1.3048e-05
Mycth_122939	NAD(P)-binding	58.0538	58.2474	58.1506	57.5015	58.3264	57.914	0.995931	-0.00588235	0.801539	58.9674	59.3506	59.159	60.4933	59.4431	59.9682	1.01368	0.0195997	0.0868542	74.5069	65.3323	69.9196	1.2073	0.271786	0.839871	68.1821	51.2468	59.7144	0.995768	-0.0061178	0.173979
Mycth_12812	Sugar isomerase (SIS)	19.1451	8.12142	13.6332	13.1701	12.5863	12.8782	0.944619	-0.0821958	1	16.329	12.8992	14.6141	10.6493	8.50702	9.57815	0.655404	-0.609543	0.139223	32.8004	12.3384	22.5694	1.75253	0.809438	0.482587	15.8887	9.35873	12.6237	1.31797	0.398319	0.903385
Mycth_13170		0.0862919	0.189465	0.137879	0.0979843	0.0441327	0.0710585	0.51537	-0.956319	0.932252	0.0445925	0	0.0222962	0	0	0	0	#NUM!	1	0.340661	0.0526479	0.196655	2.7675	1.46859	0.694	0	0.136915	0.0684576	#DIV/0!	#DIV/0!	0.830205
Mycth_140260	Glycosyltransferase Family 48 protein	142.756	149.595	146.175	182.995	190.473	186.734	1.27747	0.353286	0.033362	131.192	127.945	129.568	165.198	168.588	166.893	1.28807	0.36521	1.65182e-06	130.49	173.112	151.801	0.812926	-0.298803	0.125957	100.121	118.565	109.343	0.655168	-0.610063	1.61302e-06
Mycth_140261	Glycoside Hydrolase Family 71 protein	0.939008	0.493952	0.71648	2.68782	3.24163	2.96472	4.1379	2.0489	2.05e-09	0.626774	0.406323	0.516549	1.0149	0.873498	0.944198	1.8279	0.870186	0.046837	0.965363	0.78774	0.876552	0.295661	-1.75799	7.76522e-07	0.193995	0.0620783	0.128037	0.135603	-2.88253	1.82506e-05
Mycth_14609		8.60169	6.16144	7.38157	6.16511	6.61441	6.38976	0.865638	-0.208165	0.928406	9.39448	10.5094	9.95195	8.04985	5.78839	6.91912	0.695253	-0.524391	0.537078	5.96064	6.3274	6.14402	0.961541	-0.0565798	0.597716	8.10647	7.03367	7.57007	1.09408	0.129718	0.722126
Mycth_15682		0.102805	0	0.0514023	0.233469	0.210311	0.22189	4.31673	2.10994	0.827565	0.212502	0.125605	0.169054	0	0	0	0	#NUM!	0.757803	0.202925	0.125445	0.164185	0.739938	-0.434523	0.977262	0	0	0	#DIV/0!	#DIV/0!	NA
Mycth_15789		2.74418	0.72718	1.73568	1.93408	0.774328	1.3542	0.780214	-0.358059	0.939976	2.93398	1.38737	2.16067	0.960493	0.950674	0.955583	0.442262	-1.17703	0.33812	5.79028	1.61653	3.7034	2.73475	1.45141	0.392857	5.06723	1.70159	3.38441	3.54172	1.82445	0.262631
Mycth_16152	Zinc finger, MYND-type	0.315722	0	0.157861	0.268876	0.0807357	0.174806	1.10734	0.147099	1	0.815768	0.482181	0.648974	0.267056	0.616761	0.441909	0.680934	-0.554412	0.92778	0.934801	0.770506	0.852654	4.87771	2.28621	0.234675	0.860994	0	0.430497	0.974176	-0.0377463	0.955491
Mycth_16224	Zinc finger, CCCH-type	26.0677	20.885	23.4763	19.8079	18.7859	19.2969	0.821973	-0.282837	0.737199	27.8941	23.8064	25.8502	18.6345	16.9009	17.7677	0.687331	-0.540923	0.254562	28.8458	23.7761	26.3109	1.36348	0.447293	0.471063	31.0072	22.1424	26.5748	1.49568	0.580804	0.451546
Mycth_16301	Hypothetical protein	288.928	288.748	288.838	92.2626	94.382	93.3223	0.323096	-1.62997	9.16e-12	378.505	284.872	331.689	122.469	131.169	126.819	0.382344	-1.38706	8.26933e-12	241.407	171.917	206.662	2.2145	1.14698	4.49782e-05	153.977	118.066	136.021	1.07256	0.101061	0.398311
Mycth_16353	Cytochrome P450	0.130112	0	0.065056	0.147742	0	0.0738709	1.1355	0.183324	1	0.537897	0.317938	0.427917	0.293484	0.145242	0.219363	0.512629	-0.964013	0.916488	0	0.317533	0.158766	2.14924	1.10383	1	0	0	0	0	#NUM!	0.686045
Mycth_17263		2.06033	0.753954	1.40714	0.194958	0.175621	0.18529	0.131678	-2.92491	0.251881	0	0.209774	0.104887	0	0	0	0	#NUM!	1	0.847263	0.419012	0.633138	3.41702	1.77274	0.710867	0.681049	0.544838	0.612943	#DIV/0!	#DIV/0!	0.487672
Mycth_17562	DASH complex, subunit Dad2	50.9959	43.7951	47.3955	43.979	42.1259	43.0524	0.908366	-0.138655	0.986329	59.9109	55.0501	57.4805	55.3297	45.6847	50.5072	0.878685	-0.186583	0.814672	73.2653	54.8224	64.0439	1.48758	0.572966	0.219434	72.207	56.3999	64.3034	1.27315	0.348406	0.972551
Mycth_17585		151.642	213.627	182.635	203.542	228.406	215.974	1.18255	0.241898	0.587744	61.6033	75.2342	68.4188	195.491	229.696	212.594	3.10724	1.63563	1.84183e-13	65.3151	200.28	132.797	0.614877	-0.701631	0.215076	53.0232	172.224	112.623	0.529759	-0.916591	0.0714056
Mycth_17759		0	0	0	0	0	0	#DIV/0!	#DIV/0!	NA	0	0	0	0	0	0	#DIV/0!	#DIV/0!	NA	0	0	0	#DIV/0!	#DIV/0!	NA	0.317604	0	0.158802	#DIV/0!	#DIV/0!	1
Mycth_18938	RabGAP/TBC	12.6966	7.92512	10.3108	10.3183	9.84545	10.0819	0.977796	-0.0323951	0.91168	16.1819	10.7349	13.4584	11.7661	10.4088	11.0875	0.823832	-0.279578	0.938123	14.062	10.7792	12.4206	1.23197	0.300969	0.755723	15.7148	11.1024	13.4086	1.20934	0.274225	0.907935
Mycth_19035	Bromodomain	44.9331	32.3403	38.6367	45.4918	45.846	45.6689	1.18201	0.24124	0.180315	50.4626	44.9757	47.7192	40.5228	36.1925	38.3576	0.80382	-0.315056	0.790159	52.9154	37.3147	45.1151	0.987873	-0.0176032	0.479584	44.4153	35.905	40.1602	1.04699	0.0662514	0.299669
Mycth_2018629	Macrophage migration inhibitory factor	20.2304	13.6845	16.9575	15.1404	15.8856	15.513	0.914818	-0.128444	0.997825	24.2879	20.1608	22.2243	14.2889	16.3099	15.2994	0.688407	-0.538667	0.240362	23.3949	19.5117	21.4533	1.38292	0.467722	0.435322	19.3524	13.9959	16.6742	1.08986	0.124141	0.587695
Mycth_2018746	AMP-dependent synthetase and ligase	1.17284	1.23606	1.20445	0.941109	0.943735	0.942422	0.78245	-0.35393	0.798413	0.840432	1.05084	0.945635	0.7231	0.855358	0.789229	0.834603	-0.260838	1	1.34273	1.31664	1.32969	1.41093	0.496643	0.628217	0.759865	0.975934	0.867899	1.09968	0.137083	0.819253
Mycth_2019108	Uracil-DNA glycosylase-like	6.79384	4.45431	5.62408	6.32151	7.86612	7.09382	1.26133	0.334946	0.319994	13.3118	8.07004	10.6909	7.71539	7.21518	7.46529	0.698283	-0.518117	0.50457	30.6853	25.4458	28.0656	3.95634	1.98417	1.21601e-10	29.0541	18.3151	23.6846	3.17263	1.66568	0.00025729
Mycth_2019141		7.12192	8.17941	7.65067	12.1926	13.8972	13.0449	1.70506	0.769826	0.0273436	5.54883	7.09504	6.32193	9.26791	8.317	8.79246	1.39079	0.475901	0.0756938	2.16275	8.42298	5.29286	0.405743	-1.30136	0.0133123	4.78078	9.27181	7.02629	0.799127	-0.323503	0.2889
Mycth_2019371		64.193	59.3632	61.7781	53.3816	51.7526	52.5671	0.850902	-0.232936	0.818696	72.4458	63.7486	68.0972	67.167	64.3623	65.7647	0.965747	-0.0502834	0.336235	62.2106	72.285	67.2478	1.27928	0.355327	0.721929	71.2881	88.9741	80.1311	1.21845	0.28505	0.943833
Mycth_2019378		1.73032	0.237447	0.983884	0.736791	0.442473	0.589632	0.59929	-0.738673	0.92148	2.01187	0.79278	1.40233	0.487869	0.724323	0.606096	0.432207	-1.2102	0.701644	0.853866	3.69493	2.2744	3.85732	1.9476	0.532583	0.643458	1.14392	0.893691	1.4745	0.56023	1
Mycth_2019397	Carbohydrate Esterase Family 12 protein	16.3609	16.4309	16.3959	3.83218	3.30198	3.56708	0.217559	-2.20052	6.63e-11	15.6203	10.667	13.1437	5.62662	4.25872	4.94267	0.376049	-1.41101	0.000203057	8.03743	9.40009	8.71876	2.44423	1.28938	0.0158852	5.89317	4.2683	5.08073	1.02793	0.0397467	0.666281
Mycth_2019739	Protein of unknown function DUF567	24.4087	42.0808	33.2448	42.3245	42.6331	42.4788	1.27776	0.353616	0.569201	30.2361	32.1908	31.2134	53.765	67.0848	60.4249	1.93586	0.952976	4.36388e-05	158.281	364.078	261.179	6.14846	2.62023	0.125307	45.5267	81.0915	63.3091	1.04773	0.0672689	0.753543
Mycth_2019888	RhoGAP	8.04003	5.4449	6.74246	6.52102	5.60721	6.06411	0.899391	-0.152979	0.973529	10.414	7.59065	9.0023	6.65353	6.99346	6.8235	0.757973	-0.399782	0.704656	2.78242	1.46523	2.12383	0.350229	-1.51363	0.000116282	10.8205	8.83583	9.82814	1.44034	0.526407	0.672592
Mycth_2020046		9.47656	6.28331	7.87993	9.6952	8.9255	9.31035	1.18153	0.240652	0.443451	9.35789	6.19039	7.77414	9.52376	9.68824	9.606	1.23564	0.305253	0.0486316	14.6312	7.84262	11.2369	1.20692	0.271336	0.856311	11.2119	6.15334	8.68261	0.903874	-0.145807	0.199244
Mycth_2020422	NADH/Ubiquinone/plastoquinone (complex I)	1.65272	1.25611	1.45442	1.58794	1.9506	1.76927	1.21648	0.282715	0.867497	0.788368	1.55328	1.17083	1.43381	1.8449	1.63936	1.40017	0.485605	0.542303	0.627363	1.55131	1.08933	0.615697	-0.699708	0.458617	0.63036	1.21029	0.920324	0.561393	-0.832917	0.420068
Mycth_2020707		41.1976	38.9038	40.0507	32.2766	32.6615	32.4691	0.8107	-0.302761	0.720629	47.6261	36.8712	42.2487	28.9512	30.1928	29.572	0.699951	-0.514674	0.325845	37.6937	34.2267	35.9602	1.10752	0.147335	0.913157	38.743	37.8819	38.3125	1.29556	0.373581	0.938378
Mycth_2020741	BTB/POZ	13.6473	14.7283	14.1878	0.262652	0	0.131326	0.00925627	-6.75535	2.09e-22	37.1746	26.8481	32.0114	0.652187	0.645519	0.648853	0.0202694	-5.62455	2.15155e-39	0.456581	0.282251	0.369416	2.81297	1.49209	0.785037	0.11469	0.367009	0.24085	0.371193	-1.42976	0.509949
Mycth_2022110	Lycopene beta and epsilon cyclase	3.31858	4.04798	3.68328	3.24487	3.99165	3.61826	0.982347	-0.0256956	0.923129	6.06573	6.45731	6.26152	4.78238	4.39048	4.58643	0.732479	-0.449141	0.606018	3.82113	4.31189	4.06651	1.12388	0.168494	0.938028	4.54022	4.51787	4.52904	0.987487	-0.018166	0.417672
Mycth_2022424	BRCT	9.90104	5.65466	7.77785	5.26388	6.02965	5.64676	0.726006	-0.461947	0.560979	9.34573	8.46087	8.9033	4.26006	5.81367	5.03686	0.56573	-0.821815	0.0998497	13.6692	7.82157	10.7454	1.90293	0.92822	0.0841348	19.8072	14.6501	17.2286	3.42051	1.77421	7.88144e-06
Mycth_2022670	Major facilitator superfamily	0.0890607	0	0.0445303	0.202256	0.0455487	0.123903	2.78243	1.47635	0.852408	0.0460233	0.16322	0.104621	0	0	0	0	#NUM!	0.604118	0.043949	0	0.0219745	0.177353	-2.4953	0.643298	0.176636	0.141308	0.158972	#DIV/0!	#DIV/0!	0.487672
Mycth_2023079		7.26735	9.97276	8.62005	3.43836	2.16812	2.80324	0.3252	-1.6206	0.10086	7.82395	6.28939	7.05667	4.78112	4.73224	4.75668	0.674069	-0.569033	0.789342	11.0576	8.86783	9.96269	3.55399	1.82944	0.055137	12.0112	11.8511	11.9311	2.50829	1.3267	0.239554
Mycth_2023245		0	0	0	0	0	0	#DIV/0!	#DIV/0!	NA	0	0	0	0	0	0	#DIV/0!	#DIV/0!	NA	0	0	0	#DIV/0!	#DIV/0!	NA	0	0	0	#DIV/0!	#DIV/0!	NA
Mycth_2023927		0	0.0611485	0.0305742	0	0.056974	0.028487	0.931732	-0.102013	1	0.115135	0	0.0575675	0	0	0	0	#NUM!	0.906474	0	0.0679669	0.0339835	1.19295	0.254529	1	0.110471	0	0.0552355	#DIV/0!	#DIV/0!	0.955491
Mycth_2023929		0	0	0	0.13605	0	0.068025	#DIV/0!	#DIV/0!	1	0.247665	0	0.123832	0.405388	0	0.202694	1.63684	0.710915	0.966549	0.236502	0	0.118251	1.73835	0.797716	1	0	0.380211	0.190105	0.937894	-0.0925038	1
Mycth_2024024	Transcription factor jumonji/aspartyl beta-hydroxylase	18.1047	14.3302	16.2175	15.674	17.1375	16.4057	1.01161	0.0166519	0.813762	23.5705	19.187	21.3788	17.26	15.967	16.6135	0.777103	-0.363823	0.702174	15.9927	11.8393	13.916	0.848239	-0.237458	0.191336	25.4923	21.2667	23.3795	1.40726	0.492885	0.639292
Mycth_2024695	Beta-Ig-H3/fasciclin	1.17215	1.55489	1.36352	1.05369	1.24892	1.1513	0.844359	-0.244071	0.974454	0.858111	1.01442	0.936265	0.771148	0.654227	0.712688	0.761203	-0.393646	0.965755	1.87988	1.19191	1.5359	1.33405	0.415813	0.834858	1.25924	0.878238	1.06874	1.49959	0.584568	0.875621
Mycth_2025277	Protein of unknown function DUF757	99.6058	92.8234	96.2146	80.2504	75.1297	77.69	0.807466	-0.308526	0.62001	99.1937	89.74	94.4669	89.5803	93.3123	91.4463	0.968025	-0.0468835	0.285898	109.263	92.3614	100.812	1.29762	0.375871	0.575007	127.359	133.14	130.249	1.42433	0.510281	0.527351
Mycth_2025626		0.64887	0.332425	0.490648	0.147358	0.575215	0.361287	0.736346	-0.441544	0.942616	0.178833	0.739928	0.459381	0.439082	0.193153	0.316118	0.688138	-0.539229	0.97106	1.32349	1.53076	1.42712	3.95011	1.98189	0.0473679	0.214486	0.183028	0.198757	0.628744	-0.669456	0.666281
Mycth_2025813		2.37919	2.17659	2.27789	5.74083	3.4476	4.59422	2.01687	1.01212	0.133346	2.25404	2.66462	2.45933	3.2423	2.21321	2.72775	1.10914	0.149446	0.622173	5.57681	2.54026	4.05854	0.883401	-0.178859	0.730302	5.99667	3.77495	4.88581	1.79115	0.840885	0.511764
Mycth_2025957	SET	2.51752	2.19684	2.35718	2.85863	2.31098	2.58481	1.09657	0.132995	0.853584	2.73535	1.97171	2.35353	2.54808	2.66614	2.60711	1.10775	0.147626	0.560219	1.91127	2.2055	2.05838	0.79634	-0.328544	0.468561	1.53632	3.27748	2.4069	0.923205	-0.115278	0.595968
Mycth_2026083		0	0	0	0	0	0	#DIV/0!	#DIV/0!	NA	0	0	0	0	0	0	#DIV/0!	#DIV/0!	NA	0	0	0	#DIV/0!	#DIV/0!	NA	0	0	0	#DIV/0!	#DIV/0!	NA
Mycth_2026137		6.18324	4.36618	5.27471	4.12795	4.35415	4.24105	0.804035	-0.314669	0.747032	7.16125	5.54256	6.35191	4.6607	4.89053	4.77562	0.75184	-0.411503	0.659503	7.17582	4.89095	6.03339	1.42262	0.508545	0.438368	5.02242	3.77964	4.40103	0.921563	-0.117845	0.278281
Mycth_2026172	Guanine-specific ribonuclease N1 and T1	145.038	152.657	148.848	164.323	162.331	163.327	1.09728	0.133926	0.413613	192.264	220.075	206.169	242.173	249.534	245.853	1.19248	0.253967	0.00818206	292.433	317.262	304.848	1.86648	0.900323	0.0104288	266.011	305.808	285.909	1.16293	0.217759	0.748462
Mycth_2027194	DNA glycosylase-like protein	0.951677	0.597009	0.774343	0.771876	0.90391	0.837893	1.08207	0.113794	0.912307	1.08897	0.415266	0.752116	0.651654	0.0758814	0.363768	0.483659	-1.04794	0.662801	1.20761	0.539158	0.873384	1.04236	0.05985	0.954766	2.22453	0.719038	1.47178	4.04594	2.01647	0.313744
Mycth_2028011	Zinc finger, C2H2-like	77.2751	76.1485	76.7118	124.452	126.566	125.509	1.63611	0.710268	3.38e-05	84.7354	93.1823	88.9589	127.758	121.587	124.672	1.40146	0.486932	4.05054e-08	297.68	389.317	343.499	2.73685	1.45252	0.0223883	193.088	239.861	216.474	1.73635	0.796054	0.262772
Mycth_2028710		0	0	0	0	0	0	#DIV/0!	#DIV/0!	NA	0	0	0	0	0	0	#DIV/0!	#DIV/0!	NA	0	0	0	#DIV/0!	#DIV/0!	NA	0	0	0	#DIV/0!	#DIV/0!	NA
Mycth_2028839		0	0	0	0	0	0	#DIV/0!	#DIV/0!	NA	0	0	0	0	0	0	#DIV/0!	#DIV/0!	NA	0	0	0	#DIV/0!	#DIV/0!	NA	0	0	0	#DIV/0!	#DIV/0!	NA
Mycth_2029285	Dimeric alpha-beta barrel	6.51692	5.49827	6.00759	5.27588	3.64159	4.45874	0.742184	-0.430152	0.622499	5.79993	5.97171	5.88582	5.51239	3.70472	4.60856	0.782993	-0.352928	0.892232	6.49139	3.8288	5.1601	1.1573	0.210763	0.960185	7.89868	3.95731	5.928	1.2863	0.36323	0.984401
Mycth_2029356	Di-copper centre-containing	0.524088	0.255712	0.3899	0.396733	0.119127	0.25793	0.66153	-0.596121	0.912512	0.240737	0.071147	0.155942	0.131349	0.0650033	0.0981764	0.62957	-0.667561	0.997113	0.34483	0.142113	0.243471	0.943942	-0.0832295	1	0.404224	0.431171	0.417698	4.25456	2.08901	0.527351
Mycth_2029593		0.0572314	0.125659	0.0914452	0.324931	0.0585403	0.191735	2.09672	1.06814	0.865355	0.650652	0	0.325326	0.0645463	0.0638864	0.0642164	0.197391	-2.34087	0.677078	0.282421	0	0.141211	0.736487	-0.441269	0.962735	0.510786	0.363225	0.437006	6.80521	2.76664	0.377594
Mycth_2029812		38.1113	19.0487	28.58	50.7517	46.7478	48.7498	1.70573	0.770388	0.00702757	24.9784	21.9569	23.4677	36.605	30.7832	33.6941	1.43576	0.521819	0.000123371	13.3789	8.41241	10.8956	0.223501	-2.16164	1.42034e-17	13.5196	10.324	11.9218	0.353826	-1.49889	1.72717e-11
Mycth_2029952	Lumazine-binding protein	135.714	131.725	133.72	134.224	143.492	138.858	1.03843	0.0543999	0.639289	136.18	145.37	140.775	141.091	151.062	146.076	1.03766	0.0533299	0.0868226	128.055	130.061	129.058	0.929426	-0.105588	0.244507	143.799	168.544	156.172	1.06911	0.09641	0.457778
Mycth_2030078	Kelch repeat type 2	5.64099	4.00213	4.82156	2.65799	3.37564	3.01682	0.625694	-0.676471	0.240068	5.6318	3.61013	4.62097	4.41443	5.18319	4.79881	1.03849	0.0544816	0.431012	2.91623	2.90316	2.90969	0.96449	-0.0521612	0.644874	1.56021	1.17713	1.36867	0.285211	-1.8099	6.777e-07
Mycth_2030361	Major facilitator superfamily	11.7799	10.2565	11.0182	10.7623	9.97184	10.3671	0.940904	-0.0878805	0.988469	10.5305	11.2907	10.9106	9.27696	8.84204	9.0595	0.830339	-0.268228	1	6.44781	4.37834	5.41308	0.522141	-0.93749	0.00029868	6.71359	5.83634	6.27496	0.692639	-0.529824	0.00596283
Mycth_2030430		2.13772	1.41901	1.77837	2.31448	1.57639	1.94543	1.09395	0.129541	0.873996	0.719337	0.364442	0.541889	0	0.554954	0.277477	0.512054	-0.965631	0.764625	0.539719	0.121326	0.330523	0.169897	-2.55727	0.000704532	0.345098	0.0525864	0.198842	0.716609	-0.480742	0.883331
Mycth_2030495	Four F5 protein	748.792	595.824	672.308	967.426	971.342	969.384	1.44187	0.527946	0.0028245	729.008	766.044	747.526	836.395	817.273	826.834	1.10609	0.145474	0.00670456	347.431	324.357	335.894	0.346503	-1.52906	2.82102e-14	571.239	568.216	569.728	0.689048	-0.537324	3.79404e-05
Mycth_2030723		0.512441	0.281283	0.396862	1.74563	0.26208	1.00385	2.52948	1.33884	0.80489	2.11849	0.313047	1.21577	0.288969	1.14406	0.716514	0.589352	-0.7628	0.901023	2.78163	2.81383	2.79773	2.78699	1.47871	0.440764	2.28675	0.542044	1.4144	1.974	0.981122	0.880688
Mycth_2030873		67.0591	43.3079	55.1835	45.8227	43.8533	44.838	0.812525	-0.299515	0.61711	75.4482	63.5809	69.5145	46.1354	41.4228	43.7791	0.629783	-0.667073	0.00644765	35.5552	31.3995	33.4774	0.746629	-0.421536	0.0118031	58.6801	60.2557	59.4679	1.35836	0.441869	0.699101
Mycth_2031061		159.68	128.759	144.22	130.314	121.466	125.89	0.872905	-0.196104	0.858238	181.307	168.395	174.851	130.798	127.883	129.34	0.739717	-0.434954	0.309824	248.247	222.743	235.495	1.87064	0.903532	0.00266193	276.358	237.074	256.716	1.98481	0.989001	0.00157139
Mycth_2031268		14.2827	9.836	12.0593	16.0384	15.4719	15.7551	1.30647	0.385671	0.076305	16.668	13.7156	15.1918	17.8914	16.3259	17.1086	1.12618	0.171433	0.0260687	21.8205	23.3125	22.5665	1.43233	0.518362	0.301703	21.2453	16.6408	18.9431	1.10722	0.146945	0.568988
Mycth_2031276		0	0.351604	0.175802	0	0	0	0	#NUM!	1	0.331013	0	0.165507	0	0	0	0	#NUM!	1	0	0	0	#DIV/0!	#DIV/0!	NA	0.317604	0	0.158802	#DIV/0!	#DIV/0!	1
Mycth_2031317		0	0	0	0	0	0	#DIV/0!	#DIV/0!	NA	0	0	0	0	0	0	#DIV/0!	#DIV/0!	NA	0	0	0	#DIV/0!	#DIV/0!	NA	0	0	0	#DIV/0!	#DIV/0!	NA
Mycth_2031554	Rad21/Rec8 like protein, C-terminal	2.26989	2.49192	2.3809	1.67969	2.50441	2.09205	0.878679	-0.186591	0.984758	3.13677	2.05662	2.59669	1.86967	2.02137	1.94552	0.74923	-0.416519	0.738808	4.70705	3.67229	4.18967	2.00266	1.00192	0.045632	3.86962	2.96755	3.41858	1.75715	0.813241	0.299724
Mycth_2031594	Bile acid:sodium symporter	17.4175	12.961	15.1892	6.57551	6.56614	6.57082	0.432597	-1.2089	6.62e-05	23.7081	15.4667	19.5874	9.7712	9.01987	9.39553	0.479673	-1.05988	0.0111278	12.1394	7.61394	9.87667	1.50311	0.58795	0.286769	17.9399	11.7759	14.8579	1.58138	0.661187	0.329165
Mycth_2031920	Dopa 4,5-dioxygenase	168.375	152.941	160.658	130.769	133.641	132.205	0.822899	-0.281213	0.670451	163.607	168.787	166.197	133.829	139.711	136.77	0.822939	-0.281143	0.963593	116.045	86.5722	101.308	0.766296	-0.384027	0.0229801	138.73	143.045	140.887	1.03011	0.0427935	0.258254
Mycth_2031956		1.71938	0.740218	1.2298	2.83282	2.13802	2.48542	2.021	1.01507	0.040209	3.34498	1.44166	2.39332	0.950555	1.12901	1.03978	0.434451	-1.20273	0.283421	3.26076	1.35755	2.30916	0.929081	-0.106124	0.757726	4.3796	1.21247	2.79603	2.68906	1.4271	0.462982
Mycth_2032045		7.91081	6.51346	7.21214	8.50993	7.02703	7.76848	1.07714	0.107206	0.813776	12.3716	10.5555	11.4636	8.33494	8.13354	8.23424	0.718296	-0.47735	0.635585	10.7867	6.60468	8.6957	1.11936	0.16267	1	18.3734	13.983	16.1782	1.96475	0.974346	0.129483
Mycth_2032127		9.63218	6.75394	8.19306	2.46972	3.81386	3.14179	0.383469	-1.38282	0.00117889	14.2583	11.6925	12.9754	6.72823	6.86755	6.79789	0.523906	-0.93262	0.020822	4.53855	4.17058	4.35457	1.38602	0.470944	0.710278	10.2913	12.555	11.4232	1.6804	0.748803	0.315393
Mycth_2032303		40.1269	41.107	40.6169	24.3685	26.0673	25.2179	0.620872	-0.687633	0.0652157	34.4254	27.7225	31.0739	28.7417	31.0681	29.9049	0.962379	-0.0553226	0.489561	16.8782	11.8659	14.372	0.569914	-0.811183	0.00303797	24.496	19.7446	22.1203	0.739688	-0.435011	0.0153602
Mycth_2032845		57.2126	34.846	46.0293	38.0444	33.87	35.9572	0.781181	-0.35627	0.61835	54.8781	46.4414	50.6598	29.8318	20.122	24.9769	0.493032	-1.02025	0.00385141	148.899	130.779	139.839	3.88904	1.95941	3.81517e-11	104.339	61.5539	82.9463	3.32092	1.73158	0.00460024
Mycth_2032939		0.54426	0.418248	0.481254	1.73041	0.890731	1.31057	2.72325	1.44533	0.161435	1.06876	1.13045	1.0996	1.22765	1.27585	1.25175	1.13836	0.186959	0.63395	2.68577	1.12901	1.90739	1.45538	0.541401	0.714418	2.6986	1.03626	1.86743	1.49186	0.577111	0.827548
Mycth_2033463		527.42	547.439	537.429	519.392	525.319	522.355	0.971952	-0.0410436	0.872865	538.898	574.359	556.628	557.155	549.514	553.335	0.994083	-0.0085615	0.123824	488.138	467.172	477.655	0.914426	-0.129062	0.195892	568.726	569.973	569.35	1.02894	0.0411628	0.224122
Mycth_2033959		234.317	189.182	211.75	201.454	197.561	199.508	0.942186	-0.0859159	0.980648	237.87	196.98	217.425	203.482	206.824	205.153	0.943558	-0.0838163	0.402941	184.915	143.948	164.432	0.824187	-0.278956	0.0867723	172.953	154.144	163.548	0.797202	-0.326984	0.00660434
Mycth_2033977	Ubiquitin	1444.07	1749.11	1596.59	1513.66	1528.91	1521.29	0.952835	-0.0697012	0.959434	1372.47	1450.65	1411.56	1330.2	1413.95	1372.07	0.972026	-0.0409332	0.237573	2100.73	2038.42	2069.57	1.36041	0.444041	0.383413	2181.64	2161.93	2171.78	1.58285	0.662525	0.139471
Mycth_2033980	Extracellular membrane protein, 8-cysteine region, fungi	4.50486	5.3951	4.94998	1.55008	1.02398	1.28703	0.260006	-1.94338	0.000710213	10.4875	10.7856	10.6365	2.82258	3.91121	3.36689	0.31654	-1.65954	5.54922e-07	16.7064	9.8279	13.2671	10.3084	3.36574	9.98332e-09	9.43094	7.65304	8.54199	2.53705	1.34315	0.00833399
Mycth_2034916		0.384331	0.562566	0.473448	0.145469	0.393121	0.269295	0.568794	-0.814021	0.946992	0.662027	0.626093	0.64406	0.144484	0.143007	0.143746	0.223187	-2.16367	0.542303	1.26438	0.468972	0.866675	3.21831	1.6863	0.547263	2.41379	0.542044	1.47792	10.2815	3.36197	0.249893
Mycth_2034929	Ubiquinol-cytochrome C chaperone	71.2387	76.1968	73.7177	69.5052	70.1031	69.8041	0.946911	-0.0786994	0.954418	77.0516	75.6393	76.3454	73.2634	78.4519	75.8576	0.993611	-0.00924741	0.187016	88.3807	98.0994	93.24	1.33574	0.417637	0.515883	93.2992	97.2132	95.2562	1.25572	0.328518	1
Mycth_2034994	Mov34/MPN/PAD-1	12.6186	7.30088	9.95976	11.424	8.60482	10.0144	1.00549	0.00789639	0.931057	16.1553	11.4588	13.807	11.9878	8.8196	10.4037	0.753506	-0.408308	0.686091	25.02	10.2651	17.6425	1.76171	0.816979	0.439216	27.2815	17.8569	22.5692	2.16935	1.11726	0.0233807
Mycth_2035048	Protein of unknown function DUF1760, fungi	61.4857	49.7004	55.5931	59.3425	64.6308	61.9867	1.11501	0.157053	0.362151	45.1955	44.081	44.6383	61.3198	68.3894	64.8546	1.45289	0.538928	7.10013e-08	35.4838	40.4905	37.9872	0.612828	-0.706445	9.28249e-05	52.6058	61.9406	57.2732	0.883101	-0.179349	0.062401
Mycth_2035386		4.9144	3.79655	4.35547	7.02702	5.49223	6.25963	1.43719	0.523247	0.307545	7.05438	4.89242	5.9734	7.28738	6.70493	6.99616	1.17122	0.22801	0.301241	2.51494	2.33204	2.42349	0.387162	-1.36899	0.00392426	0.721986	1.34771	1.03485	0.147916	-2.75715	9.58284e-08
Mycth_2035523	DSBA oxidoreductase	6.57777	9.67944	8.1286	6.99229	5.86928	6.43078	0.79113	-0.338013	0.880047	10.7037	13.3374	12.0205	5.68224	8.28	6.98112	0.580767	-0.783969	0.347958	12.2932	11.7834	12.0383	1.87198	0.904563	0.178035	14.5724	13.1753	13.8739	1.98734	0.99084	0.208336
Mycth_2035701	Zinc finger, TFIIS-type	9.79667	10.294	10.0453	16.5272	16.0332	16.2802	1.62067	0.696591	0.0530026	10.559	9.06257	9.81081	15.1526	16.8725	16.0126	1.63213	0.706759	0.00610946	21.6857	18.6144	20.15	1.2377	0.307664	0.84592	22.0668	16.4321	19.2495	1.20215	0.265616	0.942603
Mycth_2035984	Major facilitator superfamily	121.094	102.908	112.001	67.9558	65.2354	66.5956	0.594597	-0.750016	0.00313151	99.6567	91.2809	95.4688	69.734	67.7614	68.7477	0.720106	-0.473718	0.213443	123.162	102.655	112.908	1.69543	0.761655	0.020906	64.1709	59.97	62.0704	0.902873	-0.147405	0.0401842
Mycth_2036106		14.7113	16.4551	15.5832	10.2434	8.37565	9.30954	0.597409	-0.743209	0.19149	24.2412	15.6002	19.9207	11.1133	9.60532	10.3593	0.520027	-0.943342	0.0446599	15.6151	11.8546	13.7348	1.47535	0.561055	0.475021	20.2314	17.7632	18.9973	1.83384	0.87487	0.232492
Mycth_2036258	DNA-directed RNA polymerase Rpb11, 13-16 kDa subunit, conserved site	96.8498	72.3184	84.5841	67.2122	62.6072	64.9097	0.767398	-0.381952	0.419162	98.1233	77.3744	87.7488	52.2813	61.1015	56.6914	0.646064	-0.630251	0.0480933	163.322	151.445	157.384	2.42465	1.27778	8.83372e-06	127.284	100.649	113.967	2.0103	1.00741	0.00464727
Mycth_20364	Kelch repeat type 1	15.9741	7.1846	11.5793	10.6008	10.0772	10.339	0.892881	-0.16346	0.974454	16.9945	12.868	14.9312	7.64546	6.20571	6.92559	0.463832	-1.10833	6.36219e-06	26.4611	14.5976	20.5293	1.98562	0.989593	0.080367	24.6336	15.1601	19.8968	2.87294	1.52253	0.00283377
Mycth_2036724		2.42758	0.495821	1.4617	8.97469	9.64367	9.30918	6.36873	2.67101	4.62e-14	3.50089	2.06929	2.78509	11.7792	14.1795	12.9793	4.6603	2.22042	3.39764e-15	7.41054	4.13331	5.77192	0.620025	-0.689602	0.0218472	3.58301	1.49292	2.53796	0.195539	-2.35447	2.18402e-14
Mycth_2037019	Ubiquitin-conjugating enzyme, E2	51.3247	36.7968	44.0607	27.8312	27.5349	27.6831	0.628294	-0.670489	0.0576617	67.3352	45.1752	56.2552	26.4615	29.2311	27.8463	0.495	-1.0145	0.00934309	35.3549	19.1718	27.2633	0.984838	-0.0220423	0.661884	50.0656	29.6931	39.8794	1.43212	0.518157	0.672013
Mycth_2037035		17.3406	10.8244	14.0825	7.87091	7.69861	7.78476	0.552796	-0.85518	0.0213148	20.3573	16.0995	18.2284	10.3977	9.55085	9.97428	0.547183	-0.869906	0.000699542	32.3545	24.0069	28.1807	3.61998	1.85598	1.17913e-11	31.2613	19.7943	25.5278	2.55936	1.35579	0.00266585
Mycth_2037146		77.484	78.45	77.967	50.9657	54.2469	52.6063	0.674725	-0.567628	0.118483	82.1571	72.4448	77.3009	65.0077	68.035	66.5214	0.860551	-0.216668	0.896043	58.2869	62.4076	60.3473	1.14715	0.198052	0.982454	76.9549	68.0919	72.5234	1.09023	0.124628	0.51809
Mycth_2037236	Protein of unknown function UPF0041	151.162	151.275	151.218	135.147	132.159	133.653	0.88384	-0.178142	0.922582	205.127	217.089	211.108	158.399	154.53	156.464	0.741158	-0.432146	0.420137	197.766	207.104	202.435	1.51464	0.59897	0.142273	310.953	322.257	316.605	2.02349	1.01685	0.00133868
Mycth_2037479	SANT, DNA-binding	0.955577	0.449592	0.702584	0.310016	0	0.155008	0.220625	-2.18033	0.578222	0.423263	1.3343	0.87878	0.769794	0.30477	0.537282	0.611395	-0.709823	0.927757	0	0	0	0	#NUM!	0.847873	0.406117	1.01078	0.708448	1.31858	0.398983	1
Mycth_2037651		0	0	0	0	0	0	#DIV/0!	#DIV/0!	NA	0	0	0	0	0	0	#DIV/0!	#DIV/0!	NA	0	0	0	#DIV/0!	#DIV/0!	NA	0	0	0	#DIV/0!	#DIV/0!	NA
Mycth_2037656	Fungal transcriptional regulatory protein, N-terminal	33.2767	29.9693	31.623	34.5915	32.926	33.7588	1.06754	0.0942863	0.569548	28.7099	29.3699	29.0399	27.2551	25.8703	26.5627	0.914698	-0.128632	0.526105	31.0124	28.0063	29.5094	0.874125	-0.194089	0.152423	16.1984	17.7517	16.9751	0.639055	-0.645987	3.37142e-05
Mycth_2038181	Zinc finger, RING-type	114.881	81.84	98.3605	86.4501	77.9912	82.2207	0.835912	-0.258578	0.7276	129.271	115.167	122.219	82.7984	82.4578	82.6281	0.676066	-0.564764	0.0967663	181.924	168.66	175.292	2.13197	1.09219	0.000252902	138.977	132.303	135.64	1.64157	0.715077	0.127288
Mycth_2038387		124.369	142.902	133.635	70.3751	79.1587	74.7669	0.559485	-0.837829	0.090697	95.2265	87.8711	91.5488	81.7667	94.1572	87.9619	0.96082	-0.0576617	0.290618	49.5561	68.0437	58.7999	0.786442	-0.346587	0.129374	65.4044	80.1066	72.7555	0.827125	-0.273823	0.0494605
Mycth_2038764		5.42083	4.01518	4.718	2.4473	2.8058	2.62655	0.556709	-0.845006	0.217329	5.33256	4.38879	4.86068	3.68294	2.84332	3.26313	0.671332	-0.574901	0.552558	20.8845	11.5557	16.2201	6.17545	2.62654	4.34528e-05	18.588	6.4939	12.5409	3.84322	1.94232	0.198958
Mycth_2039088		0.308414	1.01574	0.662079	0	0.315467	0.157734	0.23824	-2.06951	0.881731	1.59377	1.13045	1.36211	0.347833	0	0.173916	0.127682	-2.96937	0.468445	1.52194	1.12901	1.32547	8.40323	3.07094	0.487517	2.75257	1.95738	2.35498	13.5409	3.75925	0.263814
Mycth_2039751		1.93094	0	0.965469	1.37036	2.96265	2.1665	2.24399	1.16607	0.635601	1.74622	2.06429	1.90525	0.544434	0.808302	0.676368	0.355001	-1.4941	0.563538	3.57324	2.65071	3.11198	1.4364	0.522462	0.880602	2.15419	2.04248	2.09834	3.10236	1.63336	0.584058
Mycth_2039818	Ribosomal protein S17e	886.368	977.509	931.938	960.407	934.869	947.638	1.01685	0.0241013	0.758831	834.939	827.584	831.261	831.683	867.799	849.741	1.02223	0.0317216	0.0483259	1297.46	1246.04	1271.75	1.34202	0.424405	0.425669	1218.48	1110.59	1164.54	1.37046	0.454662	0.637681
Mycth_2039926		0	0	0	0	0	0	#DIV/0!	#DIV/0!	NA	0	0	0	0	0	0	#DIV/0!	#DIV/0!	NA	0	0	0	#DIV/0!	#DIV/0!	NA	0	0	0	#DIV/0!	#DIV/0!	NA
Mycth_2039938	RNA polymerase Rbp10	1.58613	1.49252	1.53932	1.41511	0.463544	0.939325	0.610219	-0.712602	0.769812	1.87349	1.10738	1.49043	2.04441	0.632345	1.33838	0.897977	-0.155249	1	1.56542	0.691228	1.12832	1.20121	0.264486	0.982418	3.93224	1.43808	2.68516	2.00628	1.00453	0.666281
Mycth_2040280		7.53828	6.35107	6.94468	4.97657	5.73818	5.35737	0.771436	-0.374381	0.849434	9.78406	6.63988	8.21197	6.92004	3.71819	5.31912	0.647727	-0.626542	0.579859	12.1114	9.19843	10.6549	1.98883	0.991921	0.196336	9.38772	9.64268	9.5152	1.78887	0.839047	0.49377
Mycth_2040301		0	0	0	0	0	0	#DIV/0!	#DIV/0!	NA	0	0	0	0	0	0	#DIV/0!	#DIV/0!	NA	0	0	0	#DIV/0!	#DIV/0!	NA	0	0	0	#DIV/0!	#DIV/0!	NA
Mycth_2040748	Protein of unknown function Cys-rich	22.6993	31.0141	26.8567	14.2883	14.5115	14.3999	0.536176	-0.899222	0.293542	27.0303	24.5684	25.7993	23.5135	25.6142	24.5638	0.952112	-0.0707974	0.562432	9.86215	12.0427	10.9524	0.760592	-0.394805	0.15635	16.5154	22.1837	19.3495	0.787724	-0.344237	0.0531786
Mycth_2040766	AAA+ ATPase, core	0.200655	0.220282	0.210468	0.0759476	0.410487	0.243217	1.1556	0.208644	0.985642	0.0691273	0.081719	0.0754232	0.0754336	0.0746625	0.075048	0.995027	-0.00719305	1	0	0.244845	0.122422	0.503345	-0.99038	0.703417	0.596943	0.212246	0.404595	5.39114	2.43059	0.526675
Mycth_2041072		35.6741	31.4262	33.5502	22.5287	24.4418	23.4853	0.700005	-0.514563	0.181014	43.7552	34.2673	39.0112	28.7461	24.3568	26.5515	0.680611	-0.555097	0.125397	50.0254	49.9511	49.9883	2.12849	1.08983	0.00056625	40.1157	31.5564	35.8361	1.34968	0.43262	0.760019
Mycth_2041611	Hypothetical protein	40.4718	31.4553	35.9636	8.94712	8.97555	8.96134	0.249178	-2.00475	8.96e-09	32.9447	19.0353	25.99	11.3102	11.1946	11.2524	0.43295	-1.20773	0.0468915	4.59527	19.2295	11.9124	1.32931	0.410678	0.966341	2.13102	5.30387	3.71745	0.33037	-1.59784	0.000899635
Mycth_2042312		0	0	0	0	0	0	#DIV/0!	#DIV/0!	NA	0	0	0	0	0	0	#DIV/0!	#DIV/0!	NA	0	0	0	#DIV/0!	#DIV/0!	NA	0	0	0	#DIV/0!	#DIV/0!	NA
Mycth_2042719	Glycoside Hydrolase Family 18 protein	1.0409	0.72718	0.884038	0.752141	0.96791	0.860026	0.972837	-0.0397296	1	2.64058	2.42789	2.53424	5.22935	8.97858	7.10397	2.8032	1.48707	0.0263156	4.01584	3.57946	3.79765	4.41574	2.14266	0.0140158	2.34594	3.70345	3.0247	0.425776	-1.23183	0.0529382
Mycth_2042961	Protein kinase-like	12.2971	8.8228	10.56	4.83769	4.15976	4.49873	0.426018	-1.23101	0.00839287	10.5078	9.3459	9.92682	5.67857	4.1073	4.89294	0.492901	-1.02063	0.0643581	4.58705	1.65412	3.12058	0.69366	-0.5277	0.324095	2.30448	3.07263	2.68856	0.549477	-0.86387	0.0615052
Mycth_2043664	GPCR, family 2, secretin-like	1.66543	0.957702	1.31157	1.08063	0.32448	0.702553	0.535659	-0.900613	0.607774	1.39341	0.678268	1.03584	0.626099	0.354113	0.490106	0.473149	-1.07963	0.560219	0.860981	0.677404	0.769192	1.09485	0.130736	1	1.02238	1.17443	1.09841	2.24116	1.16425	0.629266
Mycth_2043746	Integrase, catalytic core	7.77703	8.45538	8.11621	6.0481	7.16196	6.60503	0.813807	-0.297241	0.771751	11.8628	12.1294	11.9961	11.4221	11.7799	11.601	0.967062	-0.0483199	0.350536	7.55209	9.27616	8.41413	1.2739	0.349249	0.818194	10.4399	14.2307	12.3353	1.0633	0.0885493	0.60915
Mycth_2044135		47.6459	62.3225	54.9842	33.0531	33.0335	33.0433	0.60096	-0.73466	0.364041	38.1673	37.865	38.0162	33.646	36.2119	34.929	0.918793	-0.122188	0.657623	45.5946	54.2512	49.9229	1.51083	0.595343	0.326901	90.763	141.085	115.924	3.31884	1.73068	0.0750023
Mycth_2044732	Glycoside hydrolase, family 61	1.04474	0.607198	0.825967	0.488475	1.06863	0.778553	0.942595	-0.0852903	1	1.14328	0.525595	0.834437	0.693099	0.54881	0.620954	0.74416	-0.426315	0.937558	1.27371	0.599915	0.936812	1.20327	0.266965	0.999707	2.49864	0.910074	1.70436	2.74474	1.45667	0.334504
Mycth_2045079		1.08894	0.98449	1.03671	1.23649	0.655201	0.945843	0.912347	-0.132345	1	1.91988	1.29132	1.6056	0.939149	0.679285	0.809217	0.503997	-0.988512	0.228055	1.89657	1.28967	1.59312	1.68434	0.752181	0.397443	0.921053	0.406533	0.663793	0.820291	-0.285793	0.551651
Mycth_2045175		11.015	14.7715	12.8932	11.047	11.3343	11.1907	0.867948	-0.20432	0.956538	7.22592	5.80221	6.51407	7.32722	6.77373	7.05048	1.08235	0.114162	0.20077	8.78805	11.0263	9.90715	0.885305	-0.175753	0.222724	9.74574	8.58147	9.1636	1.29971	0.378194	0.929083
Mycth_2045420		15.9828	14.0074	14.9951	9.45548	8.79237	9.12393	0.60846	-0.716766	0.217329	10.8273	10.6663	10.7468	11.6636	11.0946	11.3791	1.05883	0.0824773	0.44104	3.579	17.8638	10.7214	1.17509	0.232766	0.994677	4.52842	14.3489	9.43864	0.829471	-0.269736	0.55628
Mycth_2045737	Tetracycline resistance protein, TetA	3.93228	2.49704	3.21466	1.40081	1.38017	1.39049	0.432547	-1.20907	0.0258816	5.1399	4.8044	4.97215	1.47829	1.46318	1.47073	0.295794	-1.75733	5.31699e-05	17.3501	13.1247	15.2374	10.9583	3.45395	2.7136e-22	22.8999	16.9232	19.9115	13.5385	3.759	4.12788e-28
Mycth_2046198		17.4033	8.41685	12.9101	12.3089	11.9952	12.1521	0.941285	-0.0872959	1	17.4571	13.1961	15.3266	12.8925	11.7926	12.3425	0.8053	-0.312402	0.817097	12.7605	9.23513	10.9978	0.905016	-0.143985	0.275876	16.0268	13.7179	14.8723	1.20497	0.268994	0.889914
Mycth_2046242		109.053	222.5	165.776	41.0272	44.5611	42.7941	0.258144	-1.95375	0.249501	78.5755	85.7606	82.1681	68.1281	68.692	68.41	0.832562	-0.26437	1	20.0586	67.7404	43.8995	1.02583	0.0367912	0.871472	11.4768	41.8017	26.6393	0.389406	-1.36065	0.00120496
Mycth_2046354		0.112529	0.370609	0.241569	0.127777	0.115103	0.12144	0.502712	-0.992196	0.97416	0.116302	0	0.058151	0	0	0	0	#NUM!	1	0.777421	0.411935	0.594678	4.89689	2.29187	0.498064	0.111591	0.11903	0.11531	#DIV/0!	#DIV/0!	0.946764
Mycth_2046431	Protein of unknown function DUF962	85.8271	70.4249	78.126	68.6398	64.175	66.4074	0.850004	-0.234459	0.795914	106.373	85.1603	95.7665	66.8833	67.2815	67.0824	0.700479	-0.513586	0.169828	61.8341	46.128	53.981	0.812877	-0.298892	0.080948	74.2757	76.1514	75.2136	1.12121	0.165059	0.598667
Mycth_2047322		0.423929	0.0664851	0.245207	0.275069	0.185839	0.230454	0.939834	-0.0895227	1	0.250366	0.739928	0.495147	0.341509	0.135207	0.238358	0.481387	-1.05473	0.754189	0.179312	0.221696	0.200504	0.870039	-0.200848	0.958737	0.180168	0.384358	0.282263	1.1842	0.243913	1
Mycth_2047945		2.09635	1.02285	1.5596	1.45469	0.595637	1.02516	0.657325	-0.605321	0.814163	1.9259	1.28065	1.60327	0.262699	1.17006	0.716379	0.446824	-1.16222	0.514558	0.459774	0.710563	0.585168	0.570805	-0.80893	0.586415	0.577462	0.985535	0.781499	1.0909	0.125519	0.985105
Mycth_2048131	C-5 cytosine-specific DNA methylase	0.15687	0.0287023	0.0927861	0.148438	0.133714	0.141076	1.52044	0.604493	0.893591	0.108086	0.0319435	0.0700148	0.206406	0.0875555	0.146981	2.09928	1.0699	0.594478	0.619287	0.159514	0.389401	2.76022	1.46478	0.41773	0.440757	0.276553	0.358655	2.44015	1.28697	0.572525
Mycth_2048823		2.15614	1.71407	1.93511	1.85733	2.96595	2.41164	1.24626	0.317603	0.700143	2.30527	1.90763	2.10645	1.50935	2.40686	1.95811	0.929576	-0.105355	0.904966	3.08192	2.44954	2.76573	1.14683	0.197646	1	2.50681	2.04476	2.27579	1.16224	0.216906	0.955491
Mycth_2048966	Zinc finger, C2H2-type matrin	86.9054	85.1009	86.0031	65.6726	64.4241	65.0484	0.756349	-0.402876	0.514217	102.65	70.2932	86.4717	87.0847	85.8564	86.4705	0.999986	-1.98951e-05	0.365839	180.208	140.038	160.123	2.4616	1.2996	7.836e-05	119.211	111.784	115.498	1.33569	0.417585	0.835956
Mycth_2049011	Cytochrome P450	0.165222	0.253936	0.209579	0	0.2028	0.1014	0.483828	-1.04743	0.830369	0.7855	0.767089	0.776294	0.409946	0.479528	0.444737	0.572898	-0.803651	0.602104	0.521807	0.24193	0.381868	3.76595	1.91302	0.317963	0.557068	0.419439	0.488253	1.09785	0.134677	0.942815
Mycth_2049292		31.6775	25.0927	28.3851	30.6417	28.0144	29.3281	1.03322	0.047148	0.698532	35.9031	34.3235	35.1133	34.2727	35.2486	34.7607	0.989957	-0.0145627	0.150147	18.7623	11.574	15.1682	0.51719	-0.951234	2.93487e-06	26.8201	20.8969	23.8585	0.686365	-0.542953	6.10176e-05
Mycth_2049301	Helicase, superfamily 1 and 2, ATP-binding	7.096	3.51415	5.30508	5.2361	5.08309	5.1596	0.972577	-0.0401152	0.97343	8.58321	5.22376	6.90348	4.44328	3.59825	4.02077	0.582426	-0.779854	0.210023	12.394	6.28237	9.33817	1.80986	0.855881	0.223352	10.9881	5.75375	8.37092	2.08192	1.05792	0.213782
Mycth_2049318	Armadillo-type fold	8.64011	5.16158	6.90084	6.06676	6.37064	6.2187	0.901151	-0.150159	0.966664	12.4007	8.29961	10.3502	5.44035	5.18025	5.3103	0.513064	-0.962789	0.0116431	9.79284	5.53223	7.66254	1.23218	0.301209	0.792081	13.9268	7.137	10.5319	1.9833	0.987904	0.26482
Mycth_2049466	Thioredoxin-like fold	8.24935	7.34753	7.79844	9.36711	9.55246	9.45979	1.21304	0.278622	0.621684	9.81285	7.2264	8.51962	11.5858	12.1623	11.874	1.39373	0.478948	0.0972818	19.5092	14.2445	16.8768	1.78406	0.835166	0.17429	15.5893	10.5369	13.0631	1.10014	0.137691	0.786058
Mycth_2049580		24.1938	18.4069	21.3004	21.3387	22.6753	22.007	1.03317	0.0470836	0.801206	31.5178	27.0849	29.3014	22.4634	22.485	22.4742	0.767002	-0.382697	0.712454	24.5443	19.7729	22.1586	1.00689	0.00990361	0.669886	35.3743	19.997	27.6856	1.23189	0.300868	0.994203
Mycth_2049605	Protein of unknown function DUF202	78.7512	62.6859	70.7186	53.3559	59.1366	56.2462	0.795353	-0.330333	0.598245	78.6866	75.7238	77.2052	53.934	60.819	57.3765	0.743169	-0.428239	0.473611	41.2097	49.7892	45.4994	0.808933	-0.305909	0.0718564	69.7187	81.5389	75.6288	1.31812	0.398477	0.886933
Mycth_2049620	Armadillo-type fold	13.926	19.1103	16.5182	13.2092	12.6009	12.905	0.781264	-0.356118	0.816077	20.7936	21.3296	21.0616	22.2375	22.9257	22.5816	1.07217	0.100532	0.0287624	24.5975	23.3653	23.9814	1.8583	0.893982	0.00598979	28.5659	28.8237	28.6948	1.27071	0.345638	0.975455
Mycth_2049706		2.68618	2.63438	2.66028	4.14821	4.10311	4.12566	1.55083	0.633045	0.0818467	3.03536	2.84435	2.93985	2.30243	3.11848	2.71046	0.92197	-0.117209	0.803921	5.33758	2.92813	4.13285	1.00174	0.00251384	0.75827	3.26757	2.5004	2.88398	1.06402	0.0895271	0.714654
Mycth_2049780	ABC transporter-like	3.07064	1.7712	2.42092	2.57662	2.5127	2.54466	1.05111	0.0719134	0.76461	3.10904	1.92035	2.51469	2.79397	2.77702	2.7855	1.10769	0.147551	0.164806	6.04056	3.8739	4.95723	1.94809	0.962064	0.0072748	4.81012	2.5764	3.69326	1.32589	0.406961	0.901598
Mycth_2049865	ThiJ/PfpI	2.31518	0.737895	1.52654	2.62888	2.52091	2.57489	1.68676	0.754251	0.335509	1.31218	1.18621	1.24919	1.85303	1.25051	1.55177	1.24222	0.312918	0.560219	3.90653	1.73148	2.81901	1.0948	0.130674	1	4.51767	1.97494	3.2463	2.092	1.06488	0.410736
Mycth_2049886		0	0	0	0	0	0	#DIV/0!	#DIV/0!	NA	0	0	0	0	0	0	#DIV/0!	#DIV/0!	NA	0	0	0	#DIV/0!	#DIV/0!	NA	0	0	0	#DIV/0!	#DIV/0!	NA
Mycth_2049934	Mur ligase, central	22.7788	16.514	19.6464	18.0569	15.6065	16.8317	0.85673	-0.223088	0.818503	26.4298	23.1486	24.7892	18.0559	17.7913	17.9236	0.723041	-0.467851	0.336126	43.6904	27.708	35.6992	2.12095	1.08471	0.0039129	33.4215	21.8974	27.6595	1.54319	0.625912	0.288328
Mycth_2049971	Zinc finger, CCHC-type	0	0	0	0	0	0	#DIV/0!	#DIV/0!	NA	0	0	0	0	0	0	#DIV/0!	#DIV/0!	NA	0	0	0	#DIV/0!	#DIV/0!	NA	0	0	0	#DIV/0!	#DIV/0!	NA
Mycth_2050031	NUDIX hydrolase, core	20.3914	16.7672	18.5793	13.376	13.8775	13.6268	0.733437	-0.447254	0.453334	21.8307	17.4695	19.6501	11.6363	13.059	12.3476	0.628375	-0.670303	0.147833	17.6396	15.6629	16.6513	1.22195	0.289188	0.866777	22.5577	21.7413	22.1495	1.79382	0.843035	0.140936
Mycth_2050101		0	0	0	0	0	0	#DIV/0!	#DIV/0!	NA	0	0	0	0	0	0	#DIV/0!	#DIV/0!	NA	0	0	0	#DIV/0!	#DIV/0!	NA	0	0	0	#DIV/0!	#DIV/0!	NA
Mycth_2050200		0	0	0	0	0	0	#DIV/0!	#DIV/0!	NA	0	0	0	0	0	0	#DIV/0!	#DIV/0!	NA	0	0	0	#DIV/0!	#DIV/0!	NA	0	0	0	#DIV/0!	#DIV/0!	NA
Mycth_2050220		2.55543	1.69291	2.12417	1.70099	1.93787	1.81943	0.856537	-0.223413	0.950583	2.91432	1.83025	2.37228	0.993808	2.06566	1.52973	0.644837	-0.632995	0.652148	4.13097	2.79563	3.4633	1.90351	0.928663	0.17429	5.67991	3.72834	4.70413	3.07513	1.62065	0.0101009
Mycth_2050269		0	0	0	0	0	0	#DIV/0!	#DIV/0!	NA	0	0	0	0	0	0	#DIV/0!	#DIV/0!	NA	0	0	0	#DIV/0!	#DIV/0!	NA	0	0	0	#DIV/0!	#DIV/0!	NA
Mycth_2050335	Zinc finger, GRF-type	40.186	25.2621	32.7241	29.3373	29.0511	29.1942	0.892133	-0.164669	0.932252	45.337	39.7423	42.5396	23.2691	22.6992	22.9842	0.5403	-0.888168	0.000158678	61.1615	47.4938	54.3277	1.8609	0.896003	0.00494993	49.62	37.6315	43.6258	1.89808	0.924541	0.0127465
Mycth_2050348	Like-Sm ribonucleoprotein, eukaryotic and archaea-type, core	87.4939	72.1035	79.7987	52.3381	51.8255	52.0818	0.652664	-0.615587	0.0656603	111.761	85.9776	98.8695	57.8039	56.2965	57.0502	0.577026	-0.793292	0.00285289	107.071	74.419	90.7452	1.74236	0.801043	0.0242696	134.566	89.1987	111.882	1.96112	0.971676	0.0160523
Mycth_2050447		14.5497	12.6577	13.6037	22.6516	20.8728	21.7622	1.59973	0.677826	0.0119677	16.3615	12.7455	14.5535	19.815	20.5318	20.1734	1.38615	0.471087	0.00600588	14.3597	7.25789	10.8088	0.496678	-1.00962	0.000422673	29.1289	18.8747	24.0018	1.18978	0.25069	0.890781
Mycth_2050467	BTB/POZ-like	0	0.178375	0.0891873	0	0.0830987	0.0415493	0.465866	-1.10201	1	0	0	0	0	0.181375	0.0906876	#DIV/0!	#DIV/0!	0.81776	0	0	0	0	#NUM!	1	0.161126	0.0859338	0.12353	1.36215	0.445884	1
Mycth_2050486		0	0.0752403	0.0376202	0.155646	0.0701038	0.112875	3.00038	1.58515	0.923089	0.283337	0	0.141668	0.0772962	0.076506	0.0769011	0.542825	-0.881441	0.978676	0.135283	0.33452	0.234902	2.08108	1.05733	0.886947	0.271859	0	0.135929	1.76759	0.821782	1
Mycth_2050514	Nse4	11.3286	4.16207	7.74532	7.68738	7.70971	7.69855	0.993961	-0.00873861	0.974454	9.7492	6.67239	8.21079	8.04257	5.5924	6.81749	0.830308	-0.268282	0.987194	12.027	6.99433	9.51067	1.23539	0.304961	0.78175	14.0538	9.78691	11.9203	1.7485	0.806114	0.175201
Mycth_2050561	Reverse transcriptase, RNA-dependent DNA polymerase	0	0	0	0	0	0	#DIV/0!	#DIV/0!	NA	0	0	0	0	0	0	#DIV/0!	#DIV/0!	NA	0	0	0	#DIV/0!	#DIV/0!	NA	0	0	0	#DIV/0!	#DIV/0!	NA
Mycth_2050660	Mov34-1	160.635	133.631	147.133	125.09	121.956	123.523	0.83953	-0.252346	0.729476	158.652	142.934	150.793	115.8	116.947	116.373	0.771742	-0.373809	0.537985	153.411	135.17	144.291	1.16813	0.2242	0.954766	162.882	149.659	156.27	1.34284	0.425284	0.743673
Mycth_2050741		54.4431	48.9696	51.7064	33.5642	35.0168	34.2905	0.663178	-0.592532	0.0658028	63.3649	60.2706	61.8178	39.3783	36.9101	38.1442	0.617043	-0.696557	0.010579	42.2938	27.0961	34.695	1.01179	0.0169168	0.624466	39.5984	32.7604	36.1794	0.948489	-0.0762966	0.124996
Mycth_2050866		0.574288	1.89139	1.23284	0.652102	0.293711	0.472906	0.383592	-1.38235	0.809134	0.296771	0	0.148385	1.29538	0.641067	0.968222	6.52506	2.70599	0.475846	3.68414	1.75191	2.71802	5.74748	2.52293	0.235441	1.42374	1.51866	1.4712	1.51949	0.603584	0.994699
Mycth_2050929	HAD-superfamily hydrolase, subfamily IA, variant 3	25.4345	23.0264	24.2304	20.4143	22.5948	21.5046	0.887504	-0.172174	0.950583	31.9767	26.3928	29.1848	21.3764	21.6246	21.5005	0.736703	-0.440844	0.474724	41.8144	31.376	36.5952	1.70174	0.767009	0.0518353	46.644	43.1934	44.9187	2.08919	1.06294	0.00521882
Mycth_2050951	Inositol monophosphatase	0.707327	0.317665	0.512496	0.730153	0.559071	0.644612	1.25779	0.33089	0.810265	0.431979	0.353537	0.392758	0.507648	0.538348	0.522998	1.3316	0.413164	0.555477	1.01541	0.666942	0.841175	1.30493	0.383974	0.867884	1.11591	0.918231	1.01707	1.94469	0.95954	0.530595
Mycth_2050974		0	0	0	0	0	0	#DIV/0!	#DIV/0!	NA	0	0	0	0	0	0	#DIV/0!	#DIV/0!	NA	0	0	0	#DIV/0!	#DIV/0!	NA	0	0	0	#DIV/0!	#DIV/0!	NA
Mycth_2050996	Kinetochore Spc7	2.78715	1.42957	2.10836	2.95727	2.96773	2.9625	1.40512	0.490696	0.179041	3.56532	1.75847	2.6619	1.62322	1.37711	1.50016	0.56357	-0.827334	0.387509	2.97623	1.50534	2.24079	0.756384	-0.40281	0.18245	4.1685	1.93322	3.05086	2.03368	1.0241	0.345693
Mycth_2051009	Fungal transcriptional regulatory protein, N-terminal	38.8531	29.524	34.1885	32.5153	33.0927	32.804	0.959503	-0.0596408	0.932922	34.7547	32.7022	33.7285	33.6369	31.7279	32.6824	0.968986	-0.0454529	0.228536	15.6193	10.7832	13.2012	0.402427	-1.3132	2.89717e-10	31.8722	23.4361	27.6542	0.84615	-0.241015	0.0135542
Mycth_2051026	WW/Rsp5/WWP	75.0403	54.598	64.8191	48.3425	44.8203	46.5814	0.718636	-0.476666	0.147966	90.2381	87.9175	89.0778	44.5826	39.8958	42.2392	0.474183	-1.07648	2.25535e-09	52.0502	53.1645	52.6074	1.12936	0.175511	0.94097	117.715	92.9216	105.318	2.49338	1.3181	8.36253e-07
Mycth_2051156		2.87467	3.53319	3.20393	10.786	10.8028	10.7944	3.36911	1.75237	1.96e-12	7.91203	6.52817	7.2201	11.2768	10.8127	11.0448	1.52973	0.613276	6.28694e-05	17.6705	14.336	16.0032	1.48255	0.568081	0.233807	16.3915	15.4681	15.9298	1.44229	0.528361	0.546701
Mycth_2051168	Taurine catabolism dioxygenase TauD/TfdA	1.46815	0.906615	1.18738	0.364674	0.422361	0.393518	0.331416	-1.59329	0.135591	0.948358	0.672662	0.81051	0.724412	0.358503	0.541458	0.668046	-0.581982	0.817628	0.815053	0.839756	0.827405	2.10259	1.07217	0.494402	0.45497	0.776482	0.615726	1.13716	0.18544	0.973918
Mycth_2051209		29.4004	19.3271	24.3637	22.6292	20.8168	21.723	0.891613	-0.16551	0.928154	34.2434	29.382	31.8127	21.9201	20.9885	21.4543	0.674393	-0.568338	0.103552	39.7196	24.8763	32.298	1.48681	0.57222	0.203536	35.1607	27.3371	31.2489	1.45653	0.54254	0.457605
Mycth_2051335	Cyclin-like F-box	8.27986	8.10287	8.19136	8.1661	7.35612	7.76111	0.947475	-0.0778408	0.983503	12.7628	10.5787	11.6707	10.1385	8.76732	9.45293	0.809968	-0.304063	0.912437	9.52594	6.06199	7.79396	1.00423	0.00609464	0.721929	19.5652	17.9668	18.766	1.9852	0.989284	0.0280274
Mycth_2051357	Dehydroquinase class I	62.2162	42.0337	52.1249	43.3357	41.2565	42.2961	0.811437	-0.301448	0.576726	76.9873	76.242	76.6147	51.7813	47.2616	49.5215	0.646371	-0.629566	0.0156505	58.4673	34.9964	46.7318	1.10487	0.143881	0.954079	78.561	62.0072	70.2841	1.41926	0.505144	0.493445
Mycth_2051392		37.2813	32.1497	34.7155	29.2628	32.716	30.9894	0.892668	-0.163805	0.952423	42.1632	39.9493	41.0563	32.9707	31.0986	32.0347	0.780262	-0.357969	0.690906	29.5563	38.7177	34.137	1.10157	0.13956	0.873505	54.4454	60.4992	57.4723	1.79407	0.843232	0.063567
Mycth_2051419	Serine/threonine protein kinase, active site	92.0026	95.9047	93.9537	130.772	136.592	133.682	1.42285	0.508782	0.00358205	93.5223	95.0191	94.2707	115.999	116.053	116.026	1.23077	0.299564	0.000129165	96.0812	71.3121	83.6967	0.626088	-0.675562	0.000227045	85.3798	72.9747	79.1772	0.68241	-0.551289	3.28215e-05
Mycth_2051606	Major facilitator superfamily	33.1796	24.6968	28.9382	25.5078	25.2887	25.3983	0.877674	-0.188244	0.894636	42.9984	36.9498	39.9741	28.7205	26.8416	27.781	0.694976	-0.524965	0.143531	13.4744	10.7912	12.1328	0.477703	-1.06582	8.99761e-07	12.5786	10.6177	11.5981	0.417484	-1.26021	8.01456e-12
Mycth_2051636	Prolyl 4-hydroxylase, alpha subunit	0.961801	2.05619	1.50899	4.48345	4.4012	4.44232	2.9439	1.55773	0.000140346	1.41259	1.11327	1.26293	3.59674	3.10791	3.35232	2.6544	1.40839	0.000500069	0.549562	0.803001	0.676282	0.152236	-2.71562	4.09848e-08	1.35537	1.82054	1.58796	0.473688	-1.07799	0.0112567
Mycth_2051640	Armadillo-type fold	8.11542	5.3304	6.72291	5.6923	6.08473	5.88851	0.875887	-0.191183	0.893544	7.91927	8.25473	8.087	5.96479	6.20065	6.08272	0.75216	-0.410888	0.515099	6.23067	3.42507	4.82787	0.819879	-0.286516	0.156703	6.23113	5.61517	5.92315	0.973767	-0.0383512	0.187186
Mycth_2051705	Vesicle transport v-SNARE	118.615	115.161	116.888	97.7209	99.8218	98.7713	0.84501	-0.24296	0.781	153.824	129.454	141.639	113.293	116.341	114.817	0.81063	-0.302885	0.841851	149.717	138.76	144.239	1.46033	0.546295	0.205381	166.275	136.069	151.172	1.31664	0.396859	0.831669
Mycth_2051745	WD40 repeat	19.3081	10.6916	14.9998	12.4539	13.104	12.779	0.85194	-0.231175	0.886805	23.3466	18.8786	21.1126	16.1882	15.4681	15.8281	0.749701	-0.415612	0.393955	35.0542	25.1075	30.0809	2.35394	1.23508	8.45979e-06	30.9308	24.2952	27.613	1.74455	0.802855	0.0388247
Mycth_2051835	Peptidoglycan-binding LysM	32.5985	25.7098	29.1541	30.0801	29.4757	29.7779	1.02139	0.0305408	0.732602	36.8293	30.24	33.5347	30.9779	31.5927	31.2853	0.932924	-0.100168	0.405726	32.9439	24.6985	28.8212	0.967873	-0.0471106	0.413867	28.5939	20.2645	24.4292	0.780852	-0.356879	0.00209123
Mycth_2051955	Hypothetical protein	0	0	0	0.312578	0.281574	0.297076	#DIV/0!	#DIV/0!	0.657204	0.284507	0.168166	0.226336	0	0.153644	0.0768221	0.339416	-1.55888	0.941623	0.135842	0.167951	0.151897	0.511306	-0.967741	0.877666	0.136491	0.436771	0.286631	3.7311	1.8996	0.903765
Mycth_2051994	Zinc finger, SWIM-type	5.20633	3.73462	4.47047	2.48563	3.05605	2.77084	0.619809	-0.690103	0.182186	6.97068	6.25259	6.61164	3.8033	4.39182	4.09756	0.61975	-0.690242	0.146873	13.9845	28.8408	21.4126	7.72785	2.95007	0.0572078	7.48034	8.10418	7.79226	1.90168	0.927277	0.086381
Mycth_2052150		55.9435	55.5981	55.7708	45.4723	50.2539	47.8631	0.858211	-0.220596	0.853584	69.7897	57.5294	63.6595	50.5433	50.1111	50.3272	0.790567	-0.33904	0.733141	48.3395	44.8934	46.6164	0.973953	-0.0380753	0.438966	50.5973	55.0113	52.8043	1.04922	0.0693176	0.367141
Mycth_2052169		0	0	0	0	0	0	#DIV/0!	#DIV/0!	NA	0	0	0	0	0	0	#DIV/0!	#DIV/0!	NA	0	0	0	#DIV/0!	#DIV/0!	NA	0	0	0	#DIV/0!	#DIV/0!	NA
Mycth_2052313	RNA-directed DNA polymerase (reverse transcriptase)	0	0	0	0	0	0	#DIV/0!	#DIV/0!	NA	0	0	0	0	0	0	#DIV/0!	#DIV/0!	NA	0	0	0	#DIV/0!	#DIV/0!	NA	0	0	0	#DIV/0!	#DIV/0!	NA
Mycth_2052357	DNA repair metallo-beta-lactamase	15.549	10.1125	12.8307	8.24217	8.02766	8.13491	0.634018	-0.657404	0.0432135	21.0589	15.9813	18.5201	8.78894	8.06156	8.42525	0.454925	-1.1363	1.41656e-07	16.346	9.12696	12.7365	1.56566	0.646768	0.282118	27.3308	17.1877	22.2593	2.64197	1.40162	0.00236724
Mycth_2052384		0	0	0	0	0	0	#DIV/0!	#DIV/0!	NA	0	0	0	0	0	0	#DIV/0!	#DIV/0!	NA	0	0	0	#DIV/0!	#DIV/0!	NA	0	0	0	#DIV/0!	#DIV/0!	NA
Mycth_2052439		0	0	0	0	0	0	#DIV/0!	#DIV/0!	NA	0	0	0	0	0	0	#DIV/0!	#DIV/0!	NA	0	0	0	#DIV/0!	#DIV/0!	NA	0	0	0	#DIV/0!	#DIV/0!	NA
Mycth_2052509		0	0	0	0	0	0	#DIV/0!	#DIV/0!	NA	0	0	0	0	0	0	#DIV/0!	#DIV/0!	NA	0	0	0	#DIV/0!	#DIV/0!	NA	0	0	0	#DIV/0!	#DIV/0!	NA
Mycth_2052590		6.84312	4.79713	5.82012	2.5277	2.78298	2.65534	0.456235	-1.13215	0.0643039	8.00987	3.92858	5.96922	1.02284	1.74865	1.38574	0.232148	-2.10688	0.0282432	5.53322	4.62781	5.08051	1.91332	0.936076	0.232082	2.45279	1.13373	1.79326	1.29408	0.371922	1
Mycth_2052653	Protein of unknown function DUF775	36.0844	30.5619	33.3232	76.2001	76.3245	76.2623	2.28857	1.19444	1.46e-09	28.941	22.2432	25.5921	30.6604	28.5244	29.5924	1.15631	0.209529	0.0421632	29.1675	28.9889	29.0782	0.381292	-1.39103	1.66541e-10	20.6443	18.8254	19.7348	0.666889	-0.584482	0.00128902
Mycth_2052657		0.379291	0.416392	0.397842	0.548144	0.634853	0.591498	1.48677	0.57218	0.658133	0.285096	0.337027	0.311062	0.738875	0.461887	0.600381	1.9301	0.948676	0.238716	0.306278	0.378673	0.342475	0.578996	-0.788374	0.378766	0.512901	0.364729	0.438815	0.730895	-0.452264	0.532809
Mycth_2052693	Pyridine nucleotide-disulphide oxidoreductase, class-II	6.5241	4.44241	5.48325	4.43861	4.22361	4.33111	0.789879	-0.340296	0.67408	4.66592	5.21313	4.93953	3.57032	3.4109	3.49061	0.706669	-0.500894	0.51936	2.55383	2.68722	2.62053	0.605048	-0.724879	0.0137703	4.5588	4.22212	4.39046	1.25779	0.330894	1
Mycth_2052727		0.204348	0.28042	0.242384	0	0	0	0	#NUM!	0.277352	0.844795	0.561756	0.703275	1.20995	0.741357	0.975652	1.3873	0.472277	0.479583	1.56302	0.56104	1.06203	#DIV/0!	#DIV/0!	0.00326511	1.06388	0.972686	1.01828	1.04369	0.061699	0.863849
Mycth_2052748		393.32	399.111	396.216	495.782	459.88	477.831	1.20599	0.270215	0.113399	401.701	407.3	404.501	508.236	484.139	496.188	1.22667	0.294744	4.2161e-05	544.13	533.455	538.793	1.12758	0.173229	0.940253	375.657	328.253	351.955	0.709318	-0.495495	4.75677e-05
Mycth_2052762		0	0	0	0	0	0	#DIV/0!	#DIV/0!	NA	0	0	0	0	0	0	#DIV/0!	#DIV/0!	NA	0	0	0	#DIV/0!	#DIV/0!	NA	0	0	0	#DIV/0!	#DIV/0!	NA
Mycth_2052991		0.772624	0.376977	0.574801	0.974792	0.790294	0.882543	1.53539	0.618605	0.776757	0.709802	0.629321	0.669561	0.968194	0.766637	0.867416	1.2955	0.373508	0.703043	1.6098	0.523766	1.06678	1.20876	0.273529	0.975044	2.12828	1.63451	1.8814	2.16897	1.11701	0.52675
Mycth_2053048	Acyl-CoA N-acyltransferase	3.66644	3.20642	3.43643	8.39703	9.7889	9.09296	2.64605	1.40384	1.67e-05	4.04627	2.73332	3.38979	6.3778	8.1162	7.247	2.13789	1.09619	0.000129991	6.01051	3.86727	4.93889	0.543155	-0.880564	0.00621089	5.29973	3.74678	4.52325	0.624155	-0.680023	0.0182983
Mycth_2053130	Glycoside Hydrolase Family 61 protein	73.871	78.6122	76.2416	57.5895	62.324	59.9567	0.786404	-0.346657	0.578177	77.0673	92.9487	85.008	68.9145	75.9832	72.4489	0.85226	-0.230635	0.937558	123.649	103.735	113.692	1.89623	0.923136	0.00305144	99.4378	80.4709	89.9544	1.24163	0.31223	0.990058
Mycth_2053143	RNA-directed DNA polymerase (reverse transcriptase)	0	0	0	0	0	0	#DIV/0!	#DIV/0!	NA	0	0	0	0	0	0	#DIV/0!	#DIV/0!	NA	0	0	0	#DIV/0!	#DIV/0!	NA	0	0	0	#DIV/0!	#DIV/0!	NA
Mycth_2053156		0	0	0	0	0	0	#DIV/0!	#DIV/0!	NA	0	0	0	0	0	0	#DIV/0!	#DIV/0!	NA	0	0	0	#DIV/0!	#DIV/0!	NA	0	0	0	#DIV/0!	#DIV/0!	NA
Mycth_2053230		3.73873	3.7313	3.73502	2.02617	2.60743	2.3168	0.620293	-0.688979	0.536475	4.91791	2.38778	3.65285	4.02492	3.31981	3.67237	1.00534	0.00768944	0.750574	6.28963	4.04368	5.16666	2.23008	1.1571	0.113798	5.98263	4.49399	5.23831	1.42641	0.51239	0.829427
Mycth_2053430	Major facilitator superfamily	14.2929	14.4175	14.3552	11.196	9.57702	10.3865	0.723538	-0.46686	0.339312	16.6989	17.3616	17.0303	11.8211	12.9027	12.3619	0.725879	-0.4622	0.451551	12.9206	11.3238	12.1222	1.1671	0.222933	0.965348	11.0103	9.29026	10.1503	0.821093	-0.284382	0.0487612
Mycth_2053489		69.4803	46.5093	57.9948	48.8872	46.9665	47.9269	0.826399	-0.275089	0.655998	80.9993	72.0085	76.5039	52.6234	45.5709	49.0971	0.64176	-0.639894	0.0135173	53.875	37.9234	45.8992	0.957693	-0.0623649	0.388945	69.6651	49.0057	59.3354	1.20853	0.273254	0.890498
Mycth_2053528		0	0	0	1.09629	0.493775	0.795031	#DIV/0!	#DIV/0!	0.428898	0	0	0	0	0.538868	0.269434	#DIV/0!	#DIV/0!	0.81776	0.952864	0	0.476432	0.599262	-0.73874	0.884007	1.43612	0	0.718062	2.66508	1.41418	0.891927
Mycth_2053555		8.97977	6.36193	7.67085	8.77374	8.1705	8.47212	1.10446	0.143336	0.661813	10.5219	9.44047	9.98117	8.06667	8.39215	8.22941	0.824494	-0.278419	0.987111	14.3759	7.64468	11.0103	1.29959	0.378055	0.696248	18.4828	10.2164	14.3496	1.7437	0.80215	0.335864
Mycth_2053582	Thioesterase superfamily	0.132177	0.217659	0.174918	0.375218	0.1352	0.255209	1.45902	0.544996	0.936784	0.273217	0.242238	0.257728	0.447214	0.590189	0.518701	2.01259	1.00905	0.481722	1.36974	0.403216	0.88648	3.47355	1.79641	0.305516	0.589837	0.279626	0.434731	0.838115	-0.25478	0.819016
Mycth_2053587		10.0843	8.80622	9.44525	13.0989	13.6751	13.387	1.41732	0.503169	0.0990882	9.63279	7.28049	8.45664	11.6317	12.195	11.9133	1.40875	0.494419	0.015184	6.63508	8.48308	7.55908	0.56466	-0.824547	0.00381736	7.42437	8.72741	8.07589	0.677887	-0.560883	0.0179758
Mycth_2053677	Pex, N-terminal	16.6543	11.8427	14.2485	14.57	13.512	14.041	0.98544	-0.0211607	0.900802	18.6601	13.9199	16.29	12.6785	11.7884	12.2334	0.750977	-0.413159	0.533811	14.7559	7.34367	11.0498	0.786962	-0.345633	0.196484	17.9042	13.5326	15.7184	1.28487	0.361628	0.947935
Mycth_2053975		32.4169	21.3429	26.8799	47.7458	50.5584	49.1521	1.82858	0.870725	1.4e-06	31.4529	29.0647	30.2588	36.887	34.8674	35.8772	1.18568	0.245712	0.00119631	22.2239	17.1935	19.7087	0.400975	-1.31842	6.51852e-11	41.3438	21.201	31.2724	0.871652	-0.198176	0.180121
Mycth_2054051		0	0	0	0	0	0	#DIV/0!	#DIV/0!	NA	0	0	0	0	0	0	#DIV/0!	#DIV/0!	NA	0	0	0	#DIV/0!	#DIV/0!	NA	0	0	0	#DIV/0!	#DIV/0!	NA
Mycth_2054076		0.141138	0.12912	0.135129	0.160262	0.0962442	0.128253	0.949116	-0.0753441	1	0.121559	0.0287402	0.0751494	0.132648	0.0525168	0.0925825	1.23198	0.300978	0.92778	0.766127	0.287035	0.526581	4.10579	2.03766	0.115908	0.606499	0.298584	0.452541	4.88798	2.28924	0.152313
Mycth_2054138		194.074	206.839	200.456	98.4142	99.3142	98.8642	0.493196	-1.01977	0.00173033	166.975	159.185	163.08	146.686	159.983	153.335	0.940242	-0.0888962	0.359905	73.6866	75.4821	74.5843	0.754412	-0.406575	0.0197284	77.6337	91.4377	84.5357	0.551315	-0.859052	4.82376e-08
Mycth_2054145	Tetratricopeptide TPR-4	39.2975	34.3365	36.817	29.3156	30.7586	30.0371	0.815849	-0.293626	0.638238	49.5822	37.9813	43.7817	32.8881	31.6778	32.283	0.737362	-0.439555	0.292596	24.2063	19.1601	21.6832	0.721881	-0.470168	0.0078707	32.1285	29.7039	30.9162	0.957663	-0.0624098	0.10736
Mycth_2054177		0.54426	0.238999	0.391629	0	0	0	0	#NUM!	0.442798	0	0	0	0	0	0	#DIV/0!	#DIV/0!	NA	0	0.132824	0.0664121	#DIV/0!	#DIV/0!	1	0.215888	0	0.107944	#DIV/0!	#DIV/0!	0.955491
Mycth_2054216	Zinc finger, CCHC-type	0	0	0	0	0	0	#DIV/0!	#DIV/0!	NA	0	0	0	0	0	0	#DIV/0!	#DIV/0!	NA	0	0	0	#DIV/0!	#DIV/0!	NA	0	0	0	#DIV/0!	#DIV/0!	NA
Mycth_2054219	NADH dehydrogenase subunit 5, C-terminal	0	0.147051	0.0735257	0	0.0913417	0.0456708	0.621155	-0.686976	1	0.230733	0.109105	0.169919	0.100713	0.0996834	0.100198	0.589682	-0.76199	0.940559	0.264401	0.163449	0.213925	4.68405	2.22776	0.564243	0.398496	0.188916	0.293706	2.93125	1.55152	0.692282
Mycth_2054232		0	0	0	0	0	0	#DIV/0!	#DIV/0!	NA	0	0	0	0	0	0	#DIV/0!	#DIV/0!	NA	0	0	0	#DIV/0!	#DIV/0!	NA	0	0	0	#DIV/0!	#DIV/0!	NA
Mycth_2054249	Shikimate kinase	24.2245	22.6049	23.4147	63.5236	63.5724	63.548	2.71402	1.44043	1.18e-12	26.2102	22.1979	24.204	81.1937	65.4908	73.3423	3.03016	1.5994	3.61649e-15	28.4657	28.5433	28.5045	0.448551	-1.15666	7.13936e-08	93.9127	105.619	99.7656	1.36027	0.443898	0.782596
Mycth_2054417		0.274248	0.301074	0.287661	0.481267	0.255018	0.368143	1.27978	0.355895	0.8307	0.592653	0.456917	0.524785	0.281182	0.0834923	0.182337	0.347451	-1.52512	0.220848	1.15649	0.912669	1.03458	2.81027	1.49071	0.0764268	0.815882	0.685669	0.750776	4.11751	2.04177	0.0909068
Mycth_2054491	Longin-like	61.5285	50.9142	56.2214	35.7207	41.0502	38.3854	0.682755	-0.550559	0.164175	73.8712	66.6963	70.2837	42.5226	47.8975	45.21	0.64325	-0.636548	0.0689078	60.497	43.4667	51.9818	1.35421	0.437449	0.478095	77.7601	62.6362	70.1982	1.55271	0.63479	0.299724
Mycth_2054510		0	0	0	0	0	0	#DIV/0!	#DIV/0!	NA	0	0	0	0	0	0	#DIV/0!	#DIV/0!	NA	0	0	0	#DIV/0!	#DIV/0!	NA	0	0	0	#DIV/0!	#DIV/0!	NA
Mycth_2054541	Splicing factor 3B subunit 5/RDS3 complex subunit 10	57.1262	47.5761	52.3512	49.0058	42.4965	45.7512	0.873928	-0.194414	0.907163	64.2237	49.8855	57.0546	42.2112	50.1756	46.1934	0.809635	-0.304657	0.892321	112.761	83.4736	98.1172	2.14458	1.1007	0.00108709	88.7926	52.0916	70.4421	1.52494	0.608752	0.548384
Mycth_2054555		8.97886	12.8779	10.9284	20.4732	21.4051	20.9392	1.91604	0.938125	0.000610032	10.4773	8.31615	9.39672	19.5996	23.2791	21.4394	2.28158	1.19003	7.64428e-10	17.2945	22.8845	20.0895	0.959422	-0.0597632	0.499244	18.526	26.9608	22.7434	1.06082	0.0851858	0.686045
Mycth_2054578		0	2.4791	1.23955	0.961574	0	0.480787	0.387872	-1.36635	0.90554	0	0	0	0	0	0	#DIV/0!	#DIV/0!	NA	0.557183	0	0.278592	0.579449	-0.787246	0.983573	0.279922	0.597167	0.438545	#DIV/0!	#DIV/0!	0.840018
Mycth_2054613	4'-phosphopantetheinyl transferase	29.3338	25.7956	27.5647	23.3673	23.6229	23.4951	0.852362	-0.230462	0.827565	29.3292	25.8807	27.605	17.2508	16.1758	16.7133	0.605446	-0.723929	0.0255436	25.8223	26.3389	26.0806	1.11005	0.150619	0.889154	22.952	19.0002	20.9761	1.25505	0.327746	1
Mycth_2054788		0	0	0	0	0	0	#DIV/0!	#DIV/0!	NA	0	0	0	0	0	0	#DIV/0!	#DIV/0!	NA	0	0	0	#DIV/0!	#DIV/0!	NA	0	0	0	#DIV/0!	#DIV/0!	NA
Mycth_2054820	Histidine triad-like motif	0.894193	0.490829	0.692511	0.444217	0.857478	0.650847	0.939837	-0.0895178	1	1.38626	0.614538	1.0004	0.630301	0.374314	0.502308	0.502108	-0.99393	0.514558	1.32378	0.886535	1.10516	1.69803	0.763859	0.654905	1.66263	0.886733	1.27468	2.53765	1.34349	0.391959
Mycth_2054970	RNA-directed DNA polymerase (reverse transcriptase)	0	0	0	0	0	0	#DIV/0!	#DIV/0!	NA	0	0	0	0	0	0	#DIV/0!	#DIV/0!	NA	0	0	0	#DIV/0!	#DIV/0!	NA	0	0	0	#DIV/0!	#DIV/0!	NA
Mycth_2054998		6.07544	4.01115	5.04329	4.58301	5.12795	4.85548	0.96276	-0.0547519	0.966703	3.90798	4.77556	4.34177	3.54577	3.13011	3.33794	0.768796	-0.379327	0.859613	6.79281	4.56211	5.67746	1.16929	0.22563	0.96574	6.95165	5.70736	6.32951	1.89623	0.923136	0.17242
Mycth_2055104	Aminotransferase, class V/Cysteine desulphurase	45.911	42.0763	43.9936	46.7709	43.8429	45.3069	1.02985	0.0424353	0.70383	35.6549	41.2411	38.448	34.128	33.2811	33.7046	0.876627	-0.189964	0.815543	40.7254	28.3965	34.5609	0.762819	-0.390587	0.0264286	64.4765	63.1518	63.8141	1.89334	0.920932	0.00967388
Mycth_2055144	RNA recognition motif, RNP-1	88.3816	71.887	80.1343	74.3007	79.5622	76.9315	0.960032	-0.0588452	0.926001	102.934	92.7223	97.8281	75.5588	74.311	74.9349	0.765985	-0.384611	0.511873	198.224	234.801	216.512	2.81435	1.4928	0.0018773	120.957	106.649	113.803	1.51869	0.602831	0.267026
Mycth_2055207		0	0	0	0	0	0	#DIV/0!	#DIV/0!	NA	0	0	0	0	0	0	#DIV/0!	#DIV/0!	NA	0.0961223	0	0.0480611	#DIV/0!	#DIV/0!	1	0	0	0	#DIV/0!	#DIV/0!	NA
Mycth_2055311	Peptidase C19, ubiquitin carboxyl-terminal hydrolase 2	53.3679	36.0589	44.7134	56.3337	55.9134	56.1235	1.25518	0.327898	0.0705875	63.381	54.4423	58.9116	62.7351	58.9127	60.8239	1.03246	0.0460856	0.0520109	49.2925	35.6088	42.4507	0.756379	-0.402819	0.0153188	59.2904	44.5304	51.9104	0.853454	-0.228615	0.0109801
Mycth_2055546	Dbl homology (DH) domain	6.94315	4.53286	5.73801	4.79322	4.17623	4.48472	0.781582	-0.355531	0.602821	5.41175	3.80469	4.60822	3.35596	3.88814	3.62205	0.785998	-0.347403	0.805864	5.82805	5.85457	5.84131	1.30249	0.381272	0.675052	4.78078	4.8555	4.81814	1.33023	0.411671	0.88207
Mycth_2055557	Zinc finger, MYND-type	10.6514	13.5182	12.0848	3.88007	2.77098	3.32552	0.275182	-1.86154	0.00416951	15.2719	18.3922	16.8321	1.52764	1.51202	1.51983	0.0902936	-3.46923	9.89353e-11	18.2902	13.5606	15.9254	4.78884	2.25968	5.38177e-13	14.8975	8.85706	11.8773	7.81488	2.96622	8.83987e-07
Mycth_2055571		4.73656	6.12242	5.42949	8.06752	7.11103	7.58928	1.39779	0.483146	0.2242	5.21118	4.85366	5.03242	8.52988	6.48125	7.50557	1.49144	0.576708	0.0282326	4.29772	4.9407	4.61921	0.60865	-0.716316	0.0407244	4.54553	4.60613	4.57583	0.609658	-0.713927	0.0232629
Mycth_2055575		51.4387	33.7565	42.5976	25.511	27.0161	26.2635	0.616549	-0.697712	0.024829	93.845	85.1821	89.5135	37.8377	33.1141	35.4759	0.396319	-1.33527	1.64799e-14	50.5294	34.6542	42.5918	1.62171	0.697513	0.0503371	92.582	67.535	80.0585	2.2567	1.17422	6.46546e-05
Mycth_2055617		10.6588	9.92527	10.292	15.6691	18.2034	16.9362	1.64557	0.718585	0.0146943	9.54075	10.4647	10.0027	7.62052	6.69274	7.15663	0.715468	-0.483041	0.658466	57.6701	143.881	100.775	5.95028	2.57296	0.166845	15.3829	35.3335	25.3582	3.54332	1.8251	0.284708
Mycth_2055659	20S proteasome, A and B subunits	71.9675	67.4496	69.7085	51.0498	52.3414	51.6956	0.741596	-0.431294	0.324691	70.8129	64.7342	67.7735	56.9328	52.7867	54.8598	0.809458	-0.304972	0.87561	75.1158	58.5445	66.8302	1.29276	0.370458	0.594773	101.574	100.496	101.035	1.84169	0.881034	0.0225362
Mycth_2055700	Aminotransferase class-III	5.95304	4.12349	5.03827	2.69582	2.06597	2.3809	0.472563	-1.08142	0.0105306	5.38355	3.72326	4.5534	1.23888	1.02844	1.13366	0.248969	-2.00596	3.19564e-06	3.95185	3.15641	3.55413	1.49277	0.577993	0.451101	2.35433	2.4738	2.41406	2.12945	1.09048	0.22724
Mycth_2055845	Amino acid permease, conserved site	22.0749	15.3799	18.7274	23.5792	25.5528	24.566	1.31177	0.391516	0.0487822	26.8204	20.38	23.6002	18.8716	19.4971	19.1843	0.812888	-0.298871	0.86	21.9934	21.2168	21.6051	0.87947	-0.185293	0.156065	42.1455	38.3351	40.2403	2.09756	1.06871	0.00108015
Mycth_2055941		11.5352	11.3147	11.425	9.843	11.4499	10.6465	0.93186	-0.101815	0.999258	13.0506	10.0906	11.5706	13.0095	10.7431	11.8763	1.02642	0.0376227	0.375639	7.34272	6.24655	6.79463	0.638206	-0.647905	0.0259404	7.8516	7.79744	7.82452	0.658833	-0.602015	0.0100393
Mycth_2055951	Hypothetical protein	1.54326	2.47073	2.00699	9.27294	10.5237	9.89832	4.93191	2.30215	1.94e-11	1.39562	1.80697	1.6013	7.03455	9.9056	8.47008	5.28951	2.40313	1.42414e-06	6.02898	4.08011	5.05455	0.510647	-0.969601	0.0024572	3.5709	1.90448	2.73769	0.323219	-1.62942	0.000188049
Mycth_2055981		5.96651	7.34753	6.65702	8.60125	9.39325	8.99725	1.35154	0.434608	0.146935	6.0593	5.95861	6.00896	7.1387	7.52905	7.33387	1.22049	0.287461	0.0920389	66.0549	145.863	105.959	11.7768	3.55788	0.040023	8.38634	11.9089	10.1476	1.38367	0.468496	0.848919
Mycth_2055988		0.584363	0.962284	0.773323	0.663543	0	0.331771	0.42902	-1.22088	0.915056	0	0.356983	0.178492	1.64763	0	0.823815	4.61543	2.20646	0.700974	0.865101	1.78264	1.32387	3.99031	1.9965	0.611218	0.579489	0.61812	0.598805	0.726868	-0.460235	0.913024
Mycth_2056182		0	0	0	0	0	0	#DIV/0!	#DIV/0!	NA	0	0	0	0	0	0	#DIV/0!	#DIV/0!	NA	0	0	0	#DIV/0!	#DIV/0!	NA	0	0	0	#DIV/0!	#DIV/0!	NA
Mycth_2056315		7.34564	7.22994	7.28779	5.57262	6.25057	5.91159	0.811164	-0.301934	0.7619	11.2242	7.89163	9.55794	6.82043	6.11451	6.46747	0.67666	-0.563498	0.244151	8.62469	3.24536	5.93502	1.00396	0.00570635	0.872096	10.3614	5.35861	7.86	1.21531	0.281327	0.973843
Mycth_2056329		47.1143	34.0809	40.5976	40.3102	40.9443	40.6273	1.00073	0.00105459	0.829831	40.3894	34.8951	37.6423	39.1312	37.1004	38.1158	1.01258	0.0180348	0.205631	39.7225	24.4222	32.0724	0.78943	-0.341118	0.0724565	48.6046	36.3146	42.4596	1.11396	0.155702	0.610956
Mycth_2056455		8.63276	9.72878	9.18077	14.2266	13.7532	13.9899	1.52383	0.607699	0.0388868	10.2645	9.05394	9.6592	11.6317	13.5595	12.5956	1.304	0.38294	0.0331155	7.08748	8.29664	7.69206	0.549829	-0.862944	0.00255824	7.57588	6.62636	7.10112	0.56378	-0.826796	0.00167611
Mycth_2056582	Ornithine decarboxylase antizyme	458.902	449.115	454.009	567.147	583.62	575.384	1.26734	0.341805	0.0427066	443.117	457.179	450.148	560.118	547.48	553.799	1.23026	0.298964	2.80475e-05	299.552	386.185	342.869	0.595896	-0.746868	4.84682e-05	493.769	663.496	578.632	1.04484	0.0632851	0.536244
Mycth_2056896	Ankyrin	22.9495	20.033	21.4913	19.5443	21.3552	20.4498	0.951538	-0.0716669	0.961472	22.8954	21.5163	22.2058	19.8614	20.0142	19.9378	0.897863	-0.155433	0.75395	41.9967	48.423	45.2099	2.21078	1.14455	0.00995124	48.361	45.9376	47.1493	2.36482	1.24173	0.000564133
Mycth_2057017	Erythromycin esterase	44.8254	40.655	42.7402	1.9185	2.36306	2.14078	0.0500883	-4.31938	1.63e-66	54.5603	40.359	47.4597	4.31658	5.19623	4.75641	0.10022	-3.31876	4.60779e-35	4.73029	10.3083	7.5193	3.51241	1.81246	0.246862	1.40193	2.00601	1.70397	0.358248	-1.48097	6.42035e-06
Mycth_2057132	Fungal transcriptional regulatory protein, N-terminal	0.508374	0.491129	0.499752	0.438716	0.416001	0.427358	0.855141	-0.225765	0.978764	0.525418	0.521744	0.523581	0.596285	0.658288	0.627286	1.19807	0.26071	0.493328	1.42493	0.918093	1.17151	2.74129	1.45486	0.0418306	0.403307	0.258116	0.330712	0.52721	-0.92355	0.141077
Mycth_2057198	14-3-3 protein	42.6539	44.5908	43.6224	34.0279	34.9783	34.5031	0.790949	-0.338343	0.564483	51.9079	54.5378	53.2229	46.9869	48.2549	47.6209	0.894745	-0.160452	0.6323	40.4482	48.2889	44.3685	1.28593	0.362812	0.737739	44.369	48.2657	46.3174	0.972627	-0.0400409	0.153946
Mycth_2057234		91.9388	63.8053	77.872	12.4465	11.6465	12.0465	0.154696	-2.69249	4.69e-26	19.2326	19.6213	19.4269	2.68328	3.60437	3.14382	0.161828	-2.62747	9.60053e-15	2.59972	1.55526	2.07749	0.172456	-2.5357	3.47771e-10	2.19082	1.43808	1.81445	0.577147	-0.792989	0.143596
Mycth_2057284	Protein kinase ATP binding, conserved site	23.5952	13.4623	18.5288	17.3896	15.9503	16.67	0.899681	-0.152514	0.962939	26.0787	17.1424	21.6105	13.977	13.3356	13.6563	0.63193	-0.662163	0.168289	21.7996	17.5746	19.6871	1.18099	0.24	0.902264	24.0073	18.8958	21.4516	1.57082	0.651513	0.213782
Mycth_2057317	Xylose isomerase-like, TIM barrel	5.17928	3.33663	4.25796	4.50764	3.99709	4.25237	0.998687	-0.00189612	0.916211	9.87246	5.60802	7.74024	5.17669	5.64306	5.40987	0.698928	-0.516784	0.587371	15.9166	9.08251	12.4995	2.93943	1.55554	0.00313705	10.1799	4.9536	7.56675	1.39869	0.484078	0.832859
Mycth_2057386	Sugar transporter, conserved site	0.630846	0.900319	0.765582	0.787957	1.16149	0.974725	1.27318	0.348437	0.667805	0.814995	0.385379	0.600187	0.782624	1.02109	0.901859	1.50263	0.587489	0.292382	2.86401	2.57875	2.72138	2.79195	1.48127	0.0141825	1.84547	1.5014	1.67344	1.85554	0.891841	0.449578
Mycth_2057433	Armadillo-type fold	79.9129	68.9852	74.449	257.205	244.005	250.605	3.36612	1.75109	3.79e-22	66.8258	58.9067	62.8662	143.634	144.119	143.877	2.28862	1.19448	6.21965e-24	83.8421	86.7532	85.2976	0.340367	-1.55484	5.96356e-15	71.6131	73.7966	72.7048	0.505327	-0.98471	2.86758e-10
Mycth_2057467		2.939	3.41627	3.17764	11.1241	13.4396	12.2818	3.86508	1.9505	3.31e-11	3.63313	3.09797	3.36555	1.68982	1.60821	1.64902	0.489969	-1.02924	0.170964	1.70625	2.17988	1.94307	0.158207	-2.66012	1.44553e-14	1.02864	1.95061	1.48963	0.903342	-0.146656	0.615249
Mycth_2057540	Hypothetical protein	2.90189	2.83947	2.87068	1.43265	1.80677	1.61971	0.564224	-0.825659	0.388166	2.80358	4.1621	3.48284	1.20951	2.11261	1.66106	0.476926	-1.06816	0.330992	4.60732	3.15608	3.8817	2.39654	1.26096	0.0781102	3.19048	3.06953	3.13	1.88434	0.914062	0.449568
Mycth_2057586		1.79192	1.00289	1.3974	2.11452	2.26418	2.18935	1.56672	0.64775	0.216638	1.63412	1.80299	1.71855	1.42655	2.54939	1.98797	1.15677	0.210104	0.536789	4.50801	3.9015	4.20476	1.92055	0.941523	0.101937	3.20553	3.41922	3.31237	1.66621	0.736567	0.502373
Mycth_2057697	Berberine/berberine-like	0.0839715	0	0.0419857	0.349614	0.429459	0.389537	9.27784	3.21379	0.0293343	0.202502	0.102595	0.152549	0.536656	0.562415	0.549536	3.60236	1.84894	0.0371496	0.221	0.170774	0.195887	0.502872	-0.991737	0.369759	0.055514	0.0296074	0.0425607	0.0774485	-3.69062	0.00288727
Mycth_2057781		2.71538	1.88796	2.30167	1.49027	1.6202	1.55523	0.675697	-0.565552	0.612277	4.49027	2.48821	3.48924	1.6333	0.90934	1.27132	0.364355	-1.45658	0.0640728	3.17125	1.71192	2.44158	1.56992	0.650688	0.489556	5.34059	2.24992	3.79526	2.98529	1.57787	0.209694
Mycth_2057810	Protein kinase-like	0.0854069	0.093761	0.0895839	0.387917	0.524161	0.456039	5.09063	2.34785	0.452162	0.706162	0.208698	0.45743	0.192646	0.286015	0.23933	0.523206	-0.934548	0.832779	2.1073	0.729511	1.4184	3.11027	1.63704	0.254243	3.55717	0.180681	1.86893	7.80898	2.96513	0.51842
Mycth_2057851		0.0275734	0.0302705	0.028922	0.563572	0.253836	0.408704	14.1313	3.82082	0.0295242	0.113991	0.101066	0.107529	0.0310976	0.0615594	0.0463285	0.430847	-1.21475	0.834137	0.217707	0.100938	0.159323	0.389824	-1.35911	0.248861	0.109374	0.0291663	0.06927	1.49519	0.580329	1
Mycth_2057861		12.1815	12.5372	12.3593	12.6433	16.4512	14.5472	1.17703	0.235146	0.453939	13.3767	12.3251	12.8509	11.8064	13.7042	12.7553	0.992561	-0.0107721	0.504254	19.2547	13.2384	16.2465	1.11681	0.159386	0.965633	20.951	18.8244	19.8877	1.55917	0.640779	0.448357
Mycth_2057906	exo-polygalacturonase	6.68867	3.84395	5.26631	3.31324	4.45395	3.8836	0.737442	-0.439399	0.667805	5.93861	6.19765	6.06813	3.69584	3.25717	3.47651	0.572912	-0.803613	0.144663	9.03809	11.9413	10.4897	2.70102	1.43351	0.0390724	9.79351	9.63918	9.71635	2.79486	1.48278	0.00146118
Mycth_2057956	Protein kinase, core	11.1423	6.88224	9.01228	10.8255	10.1389	10.4822	1.1631	0.217971	0.363838	9.82884	7.28367	8.55626	7.07029	6.39064	6.73047	0.786614	-0.346273	0.756227	6.65415	3.60833	5.13124	0.489521	-1.03056	2.4571e-05	9.33685	8.78319	9.06002	1.34612	0.428807	0.811773
Mycth_2057978	Glycosyltransferase Family 21 protein	15.3158	15.4127	15.3642	12.6544	12.1953	12.4249	0.808687	-0.306346	0.674681	21.9743	19.6634	20.8189	15.2721	16.2975	15.7848	0.758197	-0.399356	0.549967	17.2357	12.0033	14.6195	1.17663	0.234665	0.910625	17.6576	13.1382	15.3979	0.97549	-0.0358011	0.212864
Mycth_2058054		0	0	0	0	0	0	#DIV/0!	#DIV/0!	NA	0	0	0	0	0	0	#DIV/0!	#DIV/0!	NA	0	0	0	#DIV/0!	#DIV/0!	NA	0.242874	0	0.121437	#DIV/0!	#DIV/0!	1
Mycth_2058064	AMP-dependent synthetase and ligase	20.2171	21.4496	20.8333	6.16452	5.98691	6.07572	0.291634	-1.77777	8.22e-08	31.8829	32.3358	32.1093	8.8972	8.77468	8.83594	0.275183	-1.86154	8.19219e-20	13.1998	11.7999	12.4998	2.05734	1.04078	0.00434556	22.6842	19.1717	20.9279	2.3685	1.24398	0.000271707
Mycth_2058169	Acyl-CoA N-acyltransferase	0.686134	0.616294	0.651214	0.212483	0.510419	0.361451	0.555041	-0.849333	0.791837	1.35381	0.15242	0.753114	0.351741	0.348145	0.349943	0.464662	-1.10575	0.737565	1.90841	0.83724	1.37282	3.79809	1.92527	0.11558	0.494844	0.527833	0.511339	1.46121	0.547159	0.980959
Mycth_2058204		186.303	215.062	200.683	251.291	248.31	249.801	1.24476	0.315863	0.137954	219.972	213.827	216.9	231.126	249.402	240.264	1.10772	0.147594	0.00985457	147.793	140.705	144.249	0.577456	-0.792218	2.79523e-05	166.414	191.989	179.202	0.745852	-0.423038	0.000596608
Mycth_2058263	Fungal transcriptional regulatory protein, N-terminal	41.3375	33.5593	37.4484	57.7801	63.0359	60.408	1.6131	0.689836	0.000110587	41.3778	38.8734	40.1256	56.043	60.1329	58.088	1.44766	0.533718	3.57747e-08	42.4843	43.4575	42.9709	0.711345	-0.491378	0.00348815	35.1558	35.032	35.0939	0.604151	-0.727019	4.87811e-07
Mycth_2058328	Zinc finger, RING-type	19.1552	15.538	17.3466	16.7661	15.1848	15.9754	0.920957	-0.118795	1	23.2619	20.4781	21.87	19.2931	17.6406	18.4668	0.844392	-0.244015	0.98195	17.1721	12.2712	14.7216	0.921518	-0.117916	0.331017	34.3764	27.2689	30.8226	1.66908	0.739053	0.1024
Mycth_2058345	Regulation of nuclear pre-mRNA protein	31.4693	39.514	35.4916	22.5803	25.2732	23.9267	0.674151	-0.568856	0.50183	34.9392	35.9583	35.4488	29.3239	26.4713	27.8976	0.786983	-0.345595	0.757076	31.8434	48.4091	40.1263	1.67705	0.745925	0.476724	27.3121	35.8639	31.588	1.13228	0.179236	0.766916
Mycth_2058349	NLI interacting factor	8.14348	5.17581	6.65965	6.67446	6.38821	6.53133	0.980732	-0.0280686	0.94897	8.54307	7.85494	8.199	6.42212	6.69821	6.56016	0.800117	-0.321716	0.919097	18.1289	14.868	16.4985	2.52605	1.33688	0.00057937	14.8153	13.2123	14.0138	2.1362	1.09505	0.0326629
Mycth_2058462		1.04592	0.264977	0.655451	1.279	1.48132	1.38016	2.10567	1.07428	0.38568	0.582072	1.2779	0.929984	0.272217	0.898114	0.585165	0.629221	-0.668361	0.887796	2.06454	2.94523	2.50489	1.81492	0.859906	0.498064	0.877631	1.53186	1.20475	2.05882	1.04181	0.675437
Mycth_2058464	Heterokaryon incompatibility	1.93227	1.11115	1.52171	1.0448	1.03529	1.04005	0.683473	-0.549043	0.828887	1.61666	1.1242	1.37043	1.66037	1.54069	1.60053	1.1679	0.22392	0.689122	3.63247	2.9192	3.27583	3.1497	1.65521	0.073856	4.0148	3.69848	3.85664	2.4096	1.26879	0.251726
Mycth_2058513		86.6943	89.0928	87.8936	113.906	119.283	116.595	1.32654	0.407671	0.0185839	58.0929	58.7161	58.4045	114.807	120.92	117.863	2.01805	1.01296	6.68547e-21	73.792	148.756	111.274	0.954367	-0.0673837	0.709725	44.5427	55.126	49.8343	0.422814	-1.2419	4.46719e-15
Mycth_2058544		5.95889	5.70308	5.83099	7.98077	8.04875	8.01476	1.37451	0.45892	0.24085	5.44806	6.44043	5.94424	7.32364	7.931	7.62732	1.28314	0.359683	0.0983525	4.22233	3.91527	4.0688	0.507663	-0.978058	0.00759986	4.77281	5.41422	5.09352	0.667799	-0.582514	0.0459087
Mycth_2058549	Vacuolar protein sorting 55	128.238	115.889	122.064	101.974	109.681	105.827	0.866985	-0.205922	0.87297	118.503	115.045	116.774	114.287	114.692	114.49	0.980439	-0.0285002	0.227522	78.0121	95.2012	86.6067	0.818378	-0.28916	0.0722243	102.904	110.712	106.808	0.932908	-0.100194	0.0911401
Mycth_2058599		0	0	0	0	0	0	#DIV/0!	#DIV/0!	NA	0	0	0	0	0	0	#DIV/0!	#DIV/0!	NA	0	0	0	#DIV/0!	#DIV/0!	NA	0	0	0	#DIV/0!	#DIV/0!	NA
Mycth_2058620	Ribosomal protein S13	192.295	179.761	186.028	188.792	199.985	194.388	1.04494	0.063423	0.626141	225.645	195.786	210.716	179.622	198.408	189.015	0.897014	-0.156797	0.630607	279.013	241.645	260.329	1.33922	0.421395	0.451924	276.46	239.08	257.77	1.36376	0.447585	0.687529
Mycth_2058658	Helicase, superfamily 1 and 2, ATP-binding	4.62925	2.39067	3.50996	2.97039	2.8859	2.92815	0.834239	-0.261468	0.873996	7.389	4.334	5.8615	2.44055	2.30858	2.37457	0.405112	-1.30361	0.023491	6.56936	3.96081	5.26508	1.79809	0.846469	0.0578505	12.3322	5.78039	9.05632	3.81388	1.93126	0.0459087
Mycth_2058711		0.255239	0.210154	0.232696	1.23175	0.783229	1.00749	4.32963	2.11424	0.0901314	0.527592	0.233885	0.380739	1.51127	2.35058	1.93093	5.07153	2.34242	0.00126662	3.96753	1.09007	2.5288	2.51001	1.32769	0.417048	3.9232	1.01244	2.46782	1.27805	0.353945	1
Mycth_2058752		18.7924	21.0012	19.8968	13.161	12.8915	13.0263	0.654691	-0.611113	0.244755	22.0974	17.7358	19.9166	10.5337	10.0492	10.2914	0.516727	-0.952527	0.0267444	19.5466	11.5342	15.5404	1.193	0.254599	0.895012	24.3268	21.7825	23.0546	2.24018	1.16361	0.025128
Mycth_2058793		3.55293	3.16912	3.36102	3.53005	5.45127	4.49066	1.3361	0.418026	0.720629	2.98353	2.44176	2.71265	3.75659	4.21395	3.98527	1.46914	0.554976	0.433248	5.69813	10.5675	8.13281	1.81105	0.856827	0.597783	4.84453	9.39543	7.11998	1.78657	0.837195	0.662031
Mycth_2058820	Phospholipase D/Transphosphatidylase	2.60813	2.2423	2.42522	4.06764	4.11417	4.0909	1.68682	0.754305	0.0274041	2.82548	2.64908	2.73728	3.08324	2.73603	2.90963	1.06296	0.088094	0.415522	4.43486	1.99387	3.21437	0.785735	-0.347886	0.278878	7.54101	3.72272	5.63186	1.93559	0.952774	0.334035
Mycth_2058974		76.15	65.8447	70.9973	54.9639	56.9864	55.9752	0.788412	-0.342978	0.493255	74.0644	75.0929	74.5786	66.1796	72.0037	69.0917	0.926427	-0.110251	0.400518	53.4474	52.9099	53.1787	0.95004	-0.07394	0.314673	66.3928	69.7203	68.0565	0.985017	-0.0217789	0.146396
Mycth_2059010	Dienelactone hydrolase	49.5169	33.6828	41.5999	42.8874	41.0671	41.9772	1.00907	0.0130274	0.802906	52.97	45.1169	49.0435	37.1746	37.0159	37.0953	0.756375	-0.402826	0.489048	78.271	60.9663	69.6187	1.65849	0.729868	0.0376161	56.8701	39.7943	48.3322	1.30292	0.381748	0.880333
Mycth_2059044		2.1385	1.84968	1.99409	0.515085	0.861704	0.688394	0.345217	-1.53442	0.113665	2.67902	1.5835	2.13126	0.657769	0.651045	0.654407	0.307052	-1.70345	0.0635369	8.95396	6.80039	7.87718	11.4428	3.51637	1.69283e-10	5.39804	4.8668	5.13242	7.84285	2.97138	3.09037e-05
Mycth_2059134		3.07132	3.08681	3.07906	2.75069	3.53979	3.14524	1.02149	0.0306767	0.880693	2.41425	1.63841	2.02633	2.19541	2.0281	2.11176	1.04216	0.0595749	0.63395	2.90314	5.80632	4.35473	1.38455	0.469415	0.866573	2.57383	3.66056	3.11719	1.47611	0.561804	0.7597
Mycth_2059186	Berberine/berberine-like	3.49043	3.02899	3.25971	2.37803	2.24416	2.31109	0.708988	-0.496167	0.546398	2.57675	2.80242	2.68959	1.49964	2.11514	1.80739	0.671995	-0.573478	0.560219	2.85431	3.16392	3.00912	1.30203	0.380765	0.793019	2.73609	2.60203	2.66906	1.47675	0.562424	0.739096
Mycth_2059212	Methyltransferase type 12	9.00801	5.23204	7.12002	6.12525	4.33916	5.2322	0.734858	-0.444463	0.636955	8.82286	10.302	9.56243	3.78022	4.61851	4.19936	0.439153	-1.18721	0.0106696	1.13714	1.72546	1.4313	0.273556	-1.87009	4.26299e-05	5.19353	4.93038	5.06196	1.20541	0.269525	0.955993
Mycth_2059227	Ribosomal protein L4/L1e	286.767	254.711	270.739	253.88	249.726	251.803	0.930058	-0.104608	1	332.851	331.482	332.166	273.586	256.613	265.099	0.798093	-0.325372	0.757309	380.874	373.419	377.146	1.49779	0.582831	0.136346	452.213	390.699	421.456	1.5898	0.668849	0.130778
Mycth_2059229	Nucleotide binding protein, PINc	44.2173	28.3393	36.2783	28.3664	32.7076	30.537	0.841745	-0.248546	0.802906	55.2528	38.9665	47.1096	26.1083	29.5596	27.834	0.590834	-0.759175	0.0392587	62.7068	37.3927	50.0497	1.63898	0.712803	0.163498	58.1343	30.3003	44.2173	1.58861	0.667764	0.563914
Mycth_2059249	Permease for cytosine/purines, uracil, thiamine, allantoin	49.9961	33.5498	41.773	29.9643	30.3112	30.1377	0.721465	-0.470999	0.194723	39.1478	31.23	35.1889	18.2975	16.8908	17.5942	0.499992	-1.00002	8.25418e-06	45.128	30.665	37.8965	1.25744	0.330493	0.655151	24.5269	18.1067	21.3168	1.21159	0.276896	0.918752
Mycth_2059277	Protein kinase, core	0.78312	0.286574	0.534847	0.177846	0.160206	0.169026	0.316027	-1.66188	0.44813	1.295	0.637869	0.966434	0.294404	0.116558	0.205481	0.212617	-2.23367	0.0868496	0.103053	0.0637057	0.0833792	0.493292	-1.01949	0.792308	0.362407	0.0552239	0.208816	1.01623	0.0232264	0.99483
Mycth_2059413		22.5721	10.8432	16.7077	16.8311	17.1505	16.9908	1.01695	0.0242437	0.916966	24.0424	18.1445	21.0935	15.4459	12.1109	13.7784	0.653205	-0.614391	0.115817	33.1798	22.093	27.6364	1.62655	0.701814	0.0413158	29.1884	20.4482	24.8183	1.80125	0.848999	0.0477344
Mycth_2059428	Major facilitator superfamily	1.46233	1.78375	1.62304	2.89046	3.18545	3.03795	1.87177	0.904401	0.0112545	1.53935	2.15061	1.84498	3.75659	3.65773	3.70716	2.00933	1.00671	6.28156e-05	2.61922	1.91656	2.26789	0.746518	-0.421751	0.168821	2.90027	3.35142	3.12584	0.84319	-0.24607	0.162004
Mycth_2059558		0.0906359	0.0995015	0.0950687	0.0771876	0.0463544	0.061771	0.649751	-0.622041	0.957837	0.117093	0.0830532	0.100073	0.10222	0.0252938	0.063757	0.637104	-0.650399	0.960294	0.536715	0.165895	0.351305	5.68722	2.50772	0.147717	0.02247	0.0239679	0.023219	0.364179	-1.45728	0.738728
Mycth_2059579	beta-glucosidase	9.50624	7.80685	8.65654	11.3591	11.7965	11.5778	1.33746	0.419501	0.046102	11.3292	10.1515	10.7403	12.4042	12.6065	12.5054	1.16434	0.219508	0.0101812	10.2549	8.87968	9.56728	0.826346	-0.275183	0.096535	12.4231	9.78258	11.1028	0.887847	-0.171617	0.0565126
Mycth_2059686	ABC transporter-like	3.34055	2.97637	3.15846	2.85863	3.26839	3.06351	0.969938	-0.0440352	0.96551	4.10303	2.95756	3.53029	3.54911	3.24261	3.39586	0.961919	-0.0560125	0.739171	3.15359	1.06337	2.10848	0.688256	-0.538982	0.278032	1.58433	1.48511	1.53472	0.451938	-1.1458	0.00665186
Mycth_2059724	RNA-directed DNA polymerase (reverse transcriptase)	0	0	0	0	0	0	#DIV/0!	#DIV/0!	NA	0	0	0	0	0	0	#DIV/0!	#DIV/0!	NA	0	0	0	#DIV/0!	#DIV/0!	NA	0	0	0	#DIV/0!	#DIV/0!	NA
Mycth_2059769		0.995279	1.01979	1.00754	0.376712	0.610825	0.493769	0.490076	-1.02892	0.606228	1.02865	0.891746	0.960197	0.448995	0.88881	0.668903	0.696631	-0.521533	0.894216	2.22651	2.26701	2.24676	4.55023	2.18594	0.0237086	1.64496	1.4037	1.52433	2.27885	1.18831	0.474423
Mycth_2059795	Cwf15/Cwc15 cell cycle control protein	97.4375	91.417	94.4272	82.8894	76.6911	79.7903	0.844992	-0.24299	0.769812	105.848	97.1404	101.494	94.7065	97.7984	96.2524	0.948353	-0.0765039	0.319645	102.337	93.1235	97.7303	1.22484	0.292593	0.78599	116.81	99.4215	108.116	1.12325	0.167683	0.57788
Mycth_2059803		3.33639	1.60093	2.46866	3.28668	3.5031	3.39489	1.37519	0.459635	0.244465	3.09429	2.28114	2.68771	2.3175	2.31847	2.31799	0.862438	-0.213507	0.925385	3.44003	2.90508	3.17256	0.93451	-0.0977185	0.334209	3.00181	1.98075	2.49128	1.07476	0.104015	0.506947
Mycth_2059965	Hypothetical protein	0.874244	0.671831	0.773037	0.496351	0.71539	0.60587	0.783753	-0.351529	0.937284	0.677665	0.69429	0.685978	1.03528	0.585542	0.810412	1.1814	0.240494	0.643399	1.55309	0.586727	1.06991	1.76591	0.820409	0.536686	1.56051	0.786035	1.17327	1.44775	0.533813	0.885913
Mycth_2060008	N-6 adenine-specific DNA methylase, conserved site	10.4498	6.81146	8.63062	5.78453	6.61368	6.1991	0.718268	-0.477405	0.365427	14.8502	12.1689	13.5095	4.34586	4.88468	4.61527	0.34163	-1.54949	4.12765e-09	5.5112	4.74182	5.12651	0.826977	-0.274082	0.205255	9.32636	7.97921	8.65278	1.87482	0.906748	0.0969092
Mycth_2060065	Cytochrome P450	1.28802	1.0194	1.15371	0.918338	0.857889	0.888114	0.769791	-0.377461	0.838827	0.557246	0.988124	0.772685	0.506735	0.401244	0.453989	0.587548	-0.767222	0.639727	1.21207	0.65791	0.934992	1.05278	0.0742101	0.955674	0.504968	0.665369	0.585168	1.28895	0.366194	1
Mycth_2060085	Terpenoid synthase	0.0876544	0.0962284	0.0919414	0	0	0	0	#NUM!	0.931743	0.362373	0.21419	0.288281	0.296573	0.587083	0.441828	1.53263	0.616008	0.762373	0.43255	0	0.216275	#DIV/0!	#DIV/0!	0.608886	0.434616	0.46359	0.449103	1.01647	0.0235629	0.969014
Mycth_2060093	tRNA pseudouridine synthase D, core	6.30898	3.72371	5.01634	3.60117	3.45215	3.52666	0.703034	-0.508333	0.388166	5.64408	4.9316	5.28784	3.34727	3.5213	3.43429	0.649468	-0.622669	0.166808	9.42361	5.96005	7.69183	2.18105	1.12502	0.00220117	10.0573	6.20701	8.13213	2.36793	1.24362	0.0133545
Mycth_2060145		58.8922	57.2733	58.0827	51.2647	48.848	50.0563	0.861811	-0.214557	0.860251	56.9263	57.2442	57.0852	57.2541	56.5568	56.9055	0.996851	-0.00455072	0.222808	51.2911	52.0295	51.6603	1.03204	0.0455033	0.648574	84.9649	94.3434	89.6542	1.57549	0.655803	0.239214
Mycth_2060153	HEAT	8.63504	5.77794	7.20649	6.64214	6.46319	6.55267	0.909273	-0.137215	0.977813	10.3488	7.84546	9.09714	6.81213	6.08788	6.45001	0.709015	-0.496113	0.263513	11.691	8.1038	9.89742	1.51044	0.594971	0.162454	12.2848	8.69966	10.4922	1.6267	0.701949	0.174578
Mycth_2060198		8.32717	9.30943	8.8183	11.1037	12.1122	11.6079	1.31635	0.396539	0.217659	8.84322	8.30722	8.57522	14.6473	13.4742	14.0607	1.63969	0.713425	0.000516623	7.91686	7.83054	7.8737	0.678303	-0.559999	0.0469272	7.95468	7.91931	7.937	0.56448	-0.825006	0.00104111
Mycth_2060218	CENP-B protein	0.185048	0	0.0925241	0	0	0	0	#NUM!	1	0	0	0	0	0	0	#DIV/0!	#DIV/0!	NA	0	0.225801	0.112901	#DIV/0!	#DIV/0!	1	0	0	0	#DIV/0!	#DIV/0!	NA
Mycth_2060238	Sugar transporter, conserved site	4.58274	2.78137	3.68205	2.28455	2.85826	2.5714	0.698361	-0.517955	0.513057	4.96742	4.23348	4.60045	3.61373	3.45201	3.53287	0.767939	-0.380936	0.803054	4.26551	2.68234	3.47392	1.35098	0.43401	0.67525	5.72683	5.35981	5.54332	1.56907	0.649909	0.499033
Mycth_2060248		0.375662	0.183292	0.279477	0.0473959	0.384253	0.215825	0.772244	-0.372871	0.996595	0.431396	0.20399	0.317693	0.1883	0.0931877	0.140744	0.443019	-1.17456	0.673385	0.659124	0.254663	0.456894	2.11697	1.082	0.636396	0.331136	0.485666	0.408401	2.90173	1.53691	0.577294
Mycth_2060315	Cytochrome P450	0.236232	0.0648347	0.150533	0.234711	0.0906129	0.162662	1.08057	0.111792	1	0.213633	0.144312	0.178973	0.233122	0.263701	0.248412	1.38799	0.472995	0.701921	0.699443	0.288257	0.49385	3.03606	1.6022	0.249514	1.08346	0.187409	0.635434	2.55799	1.35501	0.638091
Mycth_2060338	Taurine catabolism dioxygenase TauD/TfdA	14.5068	14.3861	14.4465	22.3448	22.9976	22.6712	1.56932	0.650141	0.00237255	29.8051	35.6626	32.7339	4.99232	5.08805	5.04018	0.153975	-2.69924	3.40608e-08	1.51393	1.44394	1.47893	0.0652341	-3.93823	1.48972e-37	3.86809	5.37765	4.62287	0.917202	-0.124688	0.316247
Mycth_2060364	Six-hairpin glycosidase-like	165.637	165.169	165.403	84.9881	87.4809	86.2345	0.52136	-0.939649	3.71e-05	142.233	131.454	136.843	95.0474	97.2471	96.1472	0.702608	-0.509209	0.111055	87.7683	78.6286	83.1984	0.964793	-0.0517084	0.356601	73.0565	65.5694	69.3129	0.720904	-0.472121	0.000110928
Mycth_2060417	Armadillo-type fold	19.3276	14.4976	16.9126	10.5331	10.2403	10.3867	0.614139	-0.703364	0.0118317	27.0762	22.2587	24.6674	11.1854	11.0263	11.1058	0.450221	-1.15129	2.20532e-09	24.3124	15.4128	19.8626	1.91232	0.935321	0.0106905	25.8865	17.3761	21.6313	1.94775	0.961806	0.011978
Mycth_2060432	Protein of unknown function DUF250	9.15989	6.44998	7.80493	11.189	8.70689	9.94794	1.27457	0.350012	0.248273	11.6664	10.1175	10.8919	10.9567	10.1217	10.5392	0.967618	-0.0474903	0.49001	18.6285	11.1207	14.8746	1.49524	0.580382	0.331503	14.084	10.1294	12.1067	1.14873	0.200037	0.786733
Mycth_2060437	Peptidase S8 and S53, subtilisin, kexin, sedolisin	4.09302	4.80326	4.44814	3.68604	5.34155	4.51379	1.01476	0.0211383	0.93339	7.14765	4.31102	5.72933	2.8652	6.93222	4.89871	0.855022	-0.225966	1	5.01465	6.88885	5.95175	1.31857	0.398973	0.87954	6.01833	4.92663	5.47248	1.11713	0.159793	0.912778
Mycth_2060442	Lipocalin	4.38019	4.06885	4.22452	3.66195	3.29873	3.48034	0.823843	-0.279559	0.862223	4.97477	3.35213	4.16345	1.30287	2.36417	1.83352	0.440384	-1.18317	0.0593449	9.5011	6.40205	7.95158	2.28471	1.19201	0.0097341	4.48685	1.98567	3.23626	1.76506	0.819714	0.631573
Mycth_2060489		0	0	0	0	0	0	#DIV/0!	#DIV/0!	NA	0	0	0	0	0	0	#DIV/0!	#DIV/0!	NA	0	0	0	#DIV/0!	#DIV/0!	NA	0	0	0	#DIV/0!	#DIV/0!	NA
Mycth_2060529	Ribosomal protein S2	3.93228	3.25038	3.59133	24.8469	22.8556	23.8512	6.64134	2.73148	1.58e-28	3.77723	3.39134	3.58428	12.2089	13.2202	12.7146	3.54731	1.82673	1.2356e-16	3.78962	3.83862	3.81412	0.159913	-2.64464	2.7136e-22	5.41339	4.06157	4.73748	0.372602	-1.42429	1.77022e-08
Mycth_2060549		0	0	0	0	0	0	#DIV/0!	#DIV/0!	NA	0.614739	0	0.30737	0	0.331981	0.165991	0.540036	-0.888873	1	0	0	0	#DIV/0!	#DIV/0!	NA	0	0.314579	0.15729	0.947581	-0.077679	1
Mycth_2060581		0	0	0	0	0	0	#DIV/0!	#DIV/0!	NA	0	0	0	0	0	0	#DIV/0!	#DIV/0!	NA	0	0	0	#DIV/0!	#DIV/0!	NA	0	0	0	#DIV/0!	#DIV/0!	NA
Mycth_2060623	Zinc finger, CCHC-type	0	0	0	0	0	0	#DIV/0!	#DIV/0!	NA	0	0	0	0	0	0	#DIV/0!	#DIV/0!	NA	0	0	0	#DIV/0!	#DIV/0!	NA	0	0	0	#DIV/0!	#DIV/0!	NA
Mycth_2060641	Prolyl 4-hydroxylase, alpha subunit	103.393	95.6707	99.5318	70.4723	73.7034	72.0878	0.72427	-0.465401	0.214356	135.875	117.437	126.656	86.8617	88.7054	87.7835	0.693086	-0.528894	0.111567	55.4159	46.4505	50.9332	0.706543	-0.50115	0.00621089	64.4439	55.8692	60.1566	0.685283	-0.545228	9.2806e-05
Mycth_2060682	CoA-transferase family III	8.42543	7.25403	7.83973	5.29953	5.07539	5.18746	0.661689	-0.595775	0.151352	12.3129	11.2544	11.7837	8.33875	7.89704	8.1179	0.68891	-0.537612	0.235461	14.3762	10.9404	12.6583	2.44017	1.28698	9.98713e-05	24.2129	21.6698	22.9413	2.82602	1.49877	9.02854e-07
Mycth_2060683		0.111029	0.365668	0.238348	0.378219	0.454273	0.416246	1.74638	0.804364	0.875714	0.344254	0.406961	0.375607	0.876539	1.8591	1.36782	3.64161	1.86458	0.111567	0.109579	0.406442	0.258011	0.619852	-0.690005	0.800063	0.77072	0	0.38536	0.281734	-1.8276	0.171051
Mycth_2060709	Sodium/hydrogen exchanger	7.91399	4.08236	5.99818	6.38786	5.94932	6.16859	1.02841	0.0404178	0.885619	7.98222	6.64029	7.31126	5.41265	5.39279	5.40272	0.738959	-0.436433	0.585791	11.9199	7.83409	9.877	1.60117	0.679131	0.138303	9.14022	5.81611	7.47816	1.38415	0.468998	0.753543
Mycth_2060712		0	0	0	0	0	0	#DIV/0!	#DIV/0!	NA	0	0	0	0.2087	0	0.10435	#DIV/0!	#DIV/0!	1	0.365265	0.225801	0.295533	#DIV/0!	#DIV/0!	0.766606	0.183505	0.195738	0.189621	1.81717	0.861694	1
Mycth_2060757	Glucose/ribitol dehydrogenase	100.301	75.6965	87.9989	75.2652	70.806	73.0356	0.82996	-0.268885	0.667298	106.809	113.098	109.954	74.4031	65.3126	69.8579	0.635339	-0.654402	0.0669706	86.4635	69.029	77.7463	1.0645	0.0901741	0.75506	90.5351	71.3917	80.9634	1.15897	0.212847	0.703655
Mycth_2060854		0	0	0	0	0	0	#DIV/0!	#DIV/0!	NA	0	0	0	0	0	0	#DIV/0!	#DIV/0!	NA	0	0	0	#DIV/0!	#DIV/0!	NA	0	0	0	#DIV/0!	#DIV/0!	NA
Mycth_2060890		5.61715	9.8449	7.73102	6.15446	5.34241	5.74843	0.743554	-0.427491	0.855181	7.53692	6.02013	6.77852	6.61294	9.13047	7.8717	1.16127	0.215705	0.238554	6.80819	10.2813	8.54475	1.48645	0.571869	0.638583	6.30322	10.5282	8.41569	1.06911	0.0964063	0.791937
Mycth_2060907	RNA polymerase sigma factor 54, interaction	0.776627	0.663128	0.719878	2.25364	1.63291	1.94327	2.69945	1.43267	0.0177421	1.07022	1.0543	1.06226	3.01695	1.87836	2.44766	2.3042	1.20426	0.0124553	0.723905	1.36885	1.04638	0.53846	-0.893088	0.0847824	2.69552	3.05777	2.87665	1.17527	0.232987	0.926959
Mycth_2060942	Fungal transcriptional regulatory protein, N-terminal	10.9061	10.2674	10.5867	9.06738	8.07266	8.57002	0.809506	-0.304886	0.697389	7.70718	8.01014	7.85866	7.77951	8.28962	8.03457	1.02238	0.0319374	0.273384	7.54381	5.04261	6.29321	0.734328	-0.445503	0.0585884	3.51261	2.46499	2.9888	0.371992	-1.42666	3.3458e-08
Mycth_2060992	Alpha/beta hydrolase	0.158613	0.0580425	0.108328	0.360209	0.21632	0.288265	2.66104	1.41199	0.678456	0.0546435	0.452179	0.253411	0.417399	0.236076	0.326737	1.28936	0.366653	0.764454	1.46106	0.645146	1.0531	3.65325	1.86918	0.138182	0.891309	0.279626	0.585467	1.79186	0.841457	0.823539
Mycth_2061162	Zinc finger, C2H2-like	35.7534	18.7866	27.27	27.3255	26.2561	26.7908	0.982428	-0.0255762	0.949033	38.6891	33.6023	36.1457	26.2789	28.9098	27.5944	0.763421	-0.38945	0.619694	28.2745	15.5679	21.9212	0.818235	-0.289412	0.154374	31.8945	22.3034	27.0989	0.982046	-0.0261378	0.268167
Mycth_2061173	AAA+ ATPase, core	3.92174	2.79848	3.36011	2.73125	3.44983	3.09054	0.919774	-0.120649	1	4.51259	3.16241	3.8375	2.66854	2.50992	2.58923	0.674718	-0.567643	0.242732	2.36103	2.02583	2.19343	0.709723	-0.494671	0.0381275	6.46876	4.83968	5.65422	2.18374	1.1268	0.00573908
Mycth_2061176	Zinc finger, Tim10/DDP-type	87.0143	91.6224	89.3183	87.3304	76.7542	82.0423	0.918538	-0.122588	1	86.2569	78.1913	82.2241	76.3982	77.4971	76.9476	0.935828	-0.0956844	0.518066	199.09	223.086	211.088	2.57292	1.36341	0.000600609	207.278	196.552	201.915	2.62406	1.3918	4.9451e-06
Mycth_2061275	Tyrosine protein kinase, active site	1.31137	1.00775	1.15956	0.595621	0.804814	0.700217	0.603867	-0.727698	0.733555	1.2198	0.801104	1.01045	0.961333	0.878313	0.919823	0.91031	-0.135571	0.983407	2.00608	2.32024	2.16316	3.08927	1.62727	0.101598	1.88562	1.1097	1.49766	1.6282	0.70328	0.789795
Mycth_2061412		0	0	0	0	0	0	#DIV/0!	#DIV/0!	NA	0	0	0	0	0	0	#DIV/0!	#DIV/0!	NA	0	0	0	#DIV/0!	#DIV/0!	NA	0	0	0	#DIV/0!	#DIV/0!	NA
Mycth_2061546	Homeodomain-like	66.6563	45.0677	55.862	27.8804	29.4534	28.6669	0.513174	-0.96248	0.000100995	53.3272	51.1078	52.2175	27.955	29.4067	28.6809	0.549258	-0.864444	0.000209186	40.2474	37.0831	38.6652	1.34878	0.43165	0.462432	42.1375	36.0972	39.1174	1.36388	0.44772	0.709898
Mycth_2061596		18.756	17.8916	18.3238	12.7424	12.5331	12.6377	0.68969	-0.535981	0.187516	19.5077	20.2996	19.9037	12.9245	13.1907	13.0576	0.65604	-0.608144	0.126377	14.0888	12.0481	13.0684	1.03408	0.0483508	0.707236	17.1053	16.9453	17.0253	1.30386	0.38279	0.908801
Mycth_2061639		72.5414	72.0292	72.2853	61.6827	62.653	62.1679	0.860035	-0.217533	0.856503	79.4788	71.9692	75.724	63.9125	57.1453	60.5289	0.799336	-0.323125	0.817628	48.7592	40.3714	44.5653	0.716854	-0.480249	0.015653	40.5681	35.824	38.1961	0.631038	-0.664201	0.000105762
Mycth_2061764	Adenosine/AMP deaminase	27.1228	24.343	25.7329	22.8012	22.9245	22.8629	0.888469	-0.170607	0.938806	32.2123	33.894	33.0532	22.3786	24.4338	23.4062	0.708138	-0.497898	0.298736	26.6278	22.993	24.8104	1.08518	0.117938	0.84256	34.3521	29.7969	32.0745	1.37034	0.454537	0.71378
Mycth_2061788		0	0	0	0	0	0	#DIV/0!	#DIV/0!	NA	0	0	0	0	0	0	#DIV/0!	#DIV/0!	NA	0	0	0	#DIV/0!	#DIV/0!	NA	0	0	0	#DIV/0!	#DIV/0!	NA
Mycth_2061829	DNA-directed DNA polymerase, family B	3.18722	1.82341	2.50532	2.89271	2.70911	2.80091	1.11799	0.160904	0.588799	3.16649	2.08417	2.62533	1.65807	1.29034	1.4742	0.561532	-0.83256	0.0934571	4.55227	3.13596	3.84411	1.37245	0.456756	0.445516	6.76643	4.23791	5.50217	3.7323	1.90006	9.13518e-05
Mycth_2061852		4.35707	2.20282	3.27995	3.09215	3.07865	3.0854	0.940687	-0.0882126	1	2.48858	1.15574	1.82216	1.19616	0.735958	0.96606	0.530173	-0.915466	0.428032	2.09351	1.43409	1.7638	0.57166	-0.806771	0.024481	1.50657	0.758022	1.1323	1.17208	0.229067	0.960997
Mycth_2061855	Peptidase C1A, papain-like cysteine protease	0.0244557	0	0.0122279	0.138847	0.05003	0.0944385	7.72323	2.9492	0.546901	0	0.0597593	0.0298796	0.0827444	0	0.0413722	1.38463	0.469499	0.967579	0.724093	0.417782	0.570937	6.0456	2.59589	0.0277842	0.218266	0.284553	0.251409	6.07677	2.60331	0.289598
Mycth_2061857	ATPase, P-type, K/Mg/Cd/Cu/Zn/Na/Ca/Na/H-transporter	16.0001	9.71305	12.8566	7.81766	7.10308	7.46037	0.580277	-0.785186	0.0715205	16.0601	13.2081	14.6341	7.69766	6.34084	7.01925	0.479652	-1.05994	2.05925e-06	10.2437	5.33455	7.78914	1.04407	0.0622163	0.859782	7.78584	6.77918	7.28251	1.03751	0.0531186	0.37463
Mycth_2061987	Cytochrome P450, E-class, group I	1.03904	1.72731	1.38317	1.24725	1.48793	1.36759	0.98873	-0.0163516	0.9545	1.16592	1.26949	1.2177	1.80799	2.61798	2.21298	1.81734	0.861828	0.0227149	5.09808	2.86176	3.97992	2.91018	1.54111	0.0064182	1.20701	0.84785	1.02743	0.464274	-1.10695	0.00655279
Mycth_2062045	Regulator of chromosome condensation, RCC1	2.49991	1.62347	2.06169	2.11899	1.90881	2.0139	0.976818	-0.0338381	0.975297	3.12958	2.49511	2.81234	1.82667	1.65078	1.73873	0.618249	-0.693741	0.375856	4.27429	2.36304	3.31866	1.64788	0.720612	0.281868	4.43437	2.56984	3.50211	2.01418	1.01019	0.189914
Mycth_2062055	Glycoside Hydrolase Family 16 protein	10.9872	8.54918	9.76821	8.186	7.68951	7.93775	0.812611	-0.299363	0.731994	19.1252	19.2647	19.195	12.0002	11.5763	11.7883	0.614134	-0.703375	0.043146	37.6299	22.439	30.0344	3.78374	1.91981	5.4528e-05	30.6988	22.5507	26.6247	2.25858	1.17542	0.000932915
Mycth_2062106		0	0	0	0	0	0	#DIV/0!	#DIV/0!	NA	0	0	0	0	0	0	#DIV/0!	#DIV/0!	NA	0	0	0	#DIV/0!	#DIV/0!	NA	0	0	0	#DIV/0!	#DIV/0!	NA
Mycth_2062163		5.57691	5.87081	5.72386	7.54704	7.11103	7.32903	1.28043	0.356634	0.394291	4.65848	5.88039	5.26944	7.4098	7.41932	7.41456	1.40709	0.492712	0.0451236	4.75012	4.9407	4.84541	0.661125	-0.597006	0.0826574	3.63642	5.65665	4.64654	0.626677	-0.674205	0.0284069
Mycth_2062179	Armadillo-type fold	11.5984	7.13498	9.36669	10.8637	11.3774	11.1206	1.18725	0.247622	0.217329	11.0226	9.49293	10.2577	11.4433	10.0335	10.7384	1.04686	0.0660656	0.0623606	10.5855	8.2575	9.42149	0.847211	-0.239207	0.104409	14.7756	10.0378	12.4067	1.15536	0.208341	0.716194
Mycth_2062193	BRCT	20.6117	16.1028	18.3572	14.7471	14.8316	14.7893	0.805641	-0.311792	0.589953	22.9608	19.116	21.0384	16.6807	16.0326	16.3566	0.777466	-0.363149	0.605276	43.7162	44.8578	44.287	2.99452	1.58233	2.16742e-09	30.7732	30.9176	30.8454	1.88581	0.915183	0.00927952
Mycth_2062214		4.66467	5.16096	4.91282	4.84154	3.7649	4.30322	0.875917	-0.191135	0.939183	9.64212	5.78828	7.7152	3.82236	4.06804	3.9452	0.511354	-0.967606	0.0883041	4.45991	1.28959	2.87475	0.668046	-0.581981	0.357664	7.98667	5.24253	6.6146	1.67662	0.745556	0.315099
Mycth_2062247	O-methyltransferase, family 3	2.24472	2.2258	2.23526	1.06888	1.11099	1.08994	0.487611	-1.0362	0.345839	3.66705	2.21174	2.9394	1.71497	2.02076	1.86786	0.635457	-0.654133	0.579405	3.14445	2.38564	2.76505	2.53689	1.34306	0.140272	2.72864	3.3701	3.04937	1.63255	0.707123	0.686393
Mycth_2062265	Immunoglobulin E-set	179.404	203.075	191.239	684.025	679.934	681.98	3.56611	1.83435	4.67e-26	101.433	164.407	132.92	454.685	478.96	466.823	3.51206	1.81232	6.02018e-24	152.313	185.723	169.018	0.247834	-2.01255	2.68797e-24	63.5411	156.822	110.182	0.236025	-2.08299	7.84266e-19
Mycth_2062291	Rhodanese-like	6.33457	3.66814	5.00135	19.3852	18.4059	18.8955	3.77809	1.91766	3.74e-21	5.19798	3.99731	4.59765	9.24428	7.59568	8.41998	1.83137	0.872921	1.24274e-08	6.49232	5.09645	5.79439	0.306654	-1.70532	1.94667e-14	3.95197	1.93284	2.9424	0.349455	-1.51682	4.68458e-10
Mycth_2062435		1.46519	1.76936	1.61728	2.38467	2.79757	2.59112	1.60215	0.68001	0.214197	1.46384	0.835403	1.14962	1.81771	1.96268	1.89019	1.64419	0.717378	0.135346	0.964042	1.3111	1.13757	0.439027	-1.18762	0.019017	1.93729	2.06644	2.00187	1.05908	0.0828128	0.795406
Mycth_2062582		131.567	135.337	133.452	145.694	150.171	147.933	1.10851	0.148621	0.346694	141.069	157.912	149.49	165.784	158.212	161.998	1.08367	0.115924	0.0462267	105.078	134.113	119.596	0.808445	-0.306778	0.0851916	94.0009	116.009	105.005	0.648187	-0.625517	2.70341e-06
Mycth_2062613	Zinc finger, C2H2-type	14.8277	12.5625	13.6951	12.2006	11.485	11.8428	0.864749	-0.209646	0.89529	17.7679	15.8846	16.8263	13.9963	10.195	12.0957	0.718858	-0.476222	0.438771	37.964	32.2531	35.1086	2.96454	1.56781	3.37957e-07	25.1993	15.7411	20.4702	1.69236	0.759035	0.312584
Mycth_2062645		1.78439	0	0.892197	0	0	0	0	#NUM!	0.720497	0	0	0	0	0	0	#DIV/0!	#DIV/0!	NA	0	0.362895	0.181447	#DIV/0!	#DIV/0!	1	0.294918	0	0.147459	#DIV/0!	#DIV/0!	1
Mycth_2062716		0	0	0	0	0	0	#DIV/0!	#DIV/0!	NA	0	0	0	0	0	0	#DIV/0!	#DIV/0!	NA	0	0	0	#DIV/0!	#DIV/0!	NA	0	0	0	#DIV/0!	#DIV/0!	NA
Mycth_2062719		15.191	11.9339	13.5625	7.12128	6.05855	6.58992	0.485894	-1.04129	0.00567787	15.8443	11.9193	13.8818	7.07309	6.68963	6.88136	0.49571	-1.01243	0.0102619	11.2789	6.63232	8.9556	1.35899	0.44253	0.58278	9.467	6.56009	8.01355	1.16453	0.219748	0.881694
Mycth_2062826	RNA recognition motif, RNP-1	67.2342	50.11	58.6721	52.8306	56.063	54.4468	0.927985	-0.107827	1	67.5758	56.307	61.9414	54.2619	50.953	52.6074	0.84931	-0.235636	0.964661	63.9213	52.5794	58.2504	1.06986	0.0974194	0.787243	72.5281	51.0783	61.8032	1.1748	0.232414	0.808938
Mycth_2062887	Ribosomal protein L30, core	406.768	355.352	381.06	430.979	431.78	431.379	1.13205	0.178939	0.282376	369.169	290.256	329.713	314.414	309.753	312.083	0.946531	-0.079278	0.301184	816.026	837.951	826.988	1.91708	0.93891	0.00147536	507.351	469.269	488.31	1.56468	0.645867	0.16482
Mycth_2062976		0.908419	0.997276	0.952847	0.343836	0	0.171918	0.180425	-2.47053	0.723499	0.312958	0	0.156479	0	0	0	0	#NUM!	1	2.09197	2.21696	2.15446	12.5319	3.64754	0.210459	1.5014	1.28119	1.3913	#DIV/0!	#DIV/0!	0.356403
Mycth_2063030	Fungal transcriptional regulatory protein, N-terminal	17.3232	14.3917	15.8575	10.7592	8.87109	9.81517	0.618962	-0.692078	0.0233369	21.7521	20.5115	21.1318	13.6032	11.5478	12.5755	0.595099	-0.748798	0.0063334	7.23928	5.41379	6.32653	0.644567	-0.633597	0.00467357	9.52898	9.55108	9.54003	0.758621	-0.39855	0.00495983
Mycth_2063083		5.11854	6.62563	5.87209	7.80728	6.72032	7.2638	1.237	0.306851	0.462872	6.39554	4.66698	5.53126	7.75444	8.44268	8.09856	1.46414	0.550057	0.0300467	4.90091	4.75425	4.82758	0.664609	-0.589423	0.0911096	4.77281	6.30313	5.53797	0.683821	-0.548309	0.047988
Mycth_2063115		0	0	0	0	0	0	#DIV/0!	#DIV/0!	NA	0	0	0	0	0	0	#DIV/0!	#DIV/0!	NA	0	0	0	#DIV/0!	#DIV/0!	NA	0	0	0	#DIV/0!	#DIV/0!	NA
Mycth_2063133	Laccase-like protein	1.07447	1.20766	1.14107	0.95862	1.22989	1.09425	0.958974	-0.0604364	0.981	1.85083	3.0944	2.47261	1.29836	0.942398	1.12038	0.453116	-1.14205	0.320409	1.43918	1.21745	1.32831	1.2139	0.279651	0.954079	0.964034	0.94712	0.955577	0.852904	-0.229544	0.445927
Mycth_2063165		47.8812	32.1388	40.01	41.9587	44.1851	43.0719	1.07653	0.106386	0.639289	55.8068	43.0806	49.4437	29.9354	29.1936	29.5645	0.597942	-0.741922	0.0371496	31.8465	31.4358	31.6411	0.734612	-0.444946	0.0356826	51.7397	36.8844	44.3121	1.49883	0.583835	0.469215
Mycth_2063204	Cytochrome P450	0.239631	0.0328838	0.136257	0.102038	0.0306389	0.0663382	0.48686	-1.03842	0.85206	0.185749	0.25618	0.220964	0.135129	0.167185	0.151157	0.684079	-0.547766	0.960782	0.295628	0.146202	0.220915	3.33013	1.73558	0.486322	0.237632	0.0316842	0.134658	0.890849	-0.166747	0.916188
Mycth_2063233		0	0	0	0	0	0	#DIV/0!	#DIV/0!	NA	0.069687	0	0.0348435	0	0.225801	0.112901	3.24022	1.69609	0.841651	0.199639	0	0.0998193	#DIV/0!	#DIV/0!	0.789446	0.133728	0.213965	0.173846	1.53982	0.622762	1
Mycth_2063277	F-actin capping protein, alpha subunit	138.108	131.64	134.874	120.96	129.089	125.025	0.926973	-0.109401	1	134.96	136.633	135.797	130.368	130.206	130.287	0.959424	-0.0597603	0.237151	130.582	106.503	118.543	0.948153	-0.0768079	0.323271	175.247	160.831	168.039	1.28977	0.367109	0.913083
Mycth_2063325		0	0	0	0	0	0	#DIV/0!	#DIV/0!	NA	0	0.248147	0.124073	0	0	0	0	#NUM!	1	0	0	0	#DIV/0!	#DIV/0!	NA	0	0	0	#DIV/0!	#DIV/0!	NA
Mycth_2063330		57.2862	41.7536	49.5199	75.1074	77.2022	76.1548	1.53786	0.620926	0.0028191	30.3969	26.8421	28.6195	54.8836	58.1462	56.5149	1.9747	0.981633	2.54422e-10	13.8723	11.5303	12.7013	0.166782	-2.58396	2.26076e-23	16.7497	14.1181	15.4339	0.273095	-1.87253	2.92368e-16
Mycth_2063376		0	0	0	0	0	0	#DIV/0!	#DIV/0!	NA	0	0	0	0	0	0	#DIV/0!	#DIV/0!	NA	0	0	0	#DIV/0!	#DIV/0!	NA	0	0	0	#DIV/0!	#DIV/0!	NA
Mycth_2063420	Mitochondrial carrier protein	53.4772	50.7686	52.1229	51.4702	48.8135	50.1418	0.961992	-0.0559027	0.926235	53.7963	54.2614	54.0288	52.5579	51.6794	52.1186	0.964645	-0.0519301	0.26804	50.2155	51.1471	50.6813	1.01076	0.0154385	0.539438	62.1222	57.8595	59.9909	1.15104	0.202943	0.696212
Mycth_2063443	FAD dependent oxidoreductase	41.7319	34.7033	38.2176	37.4219	39.2138	38.3178	1.00262	0.00377819	0.795914	50.2809	48.2092	49.2451	38.7218	36.4669	37.5943	0.763413	-0.389463	0.521487	53.9573	35.4464	44.7019	1.16661	0.22232	0.923907	49.4828	41.3309	45.4068	1.20781	0.272393	0.887803
Mycth_2063480	Glycoside Hydrolase Family 61M protein	0.16738	0.551258	0.359319	23.4724	20.2882	21.8803	60.8937	5.92822	1.18e-44	0.518976	0.71576	0.617368	19.4437	18.0304	18.737	30.3499	4.92362	3.36643e-42	2.47793	1.4297	1.95381	0.0892955	-3.48527	3.29494e-22	1.24488	1.0623	1.15359	0.0615673	-4.02169	1.48431e-26
Mycth_2063555	Lipase, GDXG, active site	0.216759	0.158641	0.1877	0.307662	0.295622	0.301642	1.60704	0.684407	0.609806	0.16802	0.198625	0.183322	0.162976	0.181473	0.172225	0.939463	-0.0900913	0.962918	0.267412	0.264496	0.265954	0.881687	-0.181662	0.777021	0.214951	0.210174	0.212563	1.23422	0.303597	1
Mycth_2063591	Tyrosinase-like protein	3.7525	2.45321	3.10286	2.05866	1.94072	1.99969	0.644468	-0.633819	0.420586	3.35539	2.47267	2.91403	2.37759	1.55317	1.96538	0.674454	-0.568207	0.570241	2.12223	1.64635	1.88429	0.942291	-0.0857559	0.718128	2.63411	1.65015	2.14213	1.08993	0.124235	0.827596
Mycth_2063631		3.48948	2.43779	2.96363	1.44084	1.29792	1.36938	0.462061	-1.11385	0.467469	1.31144	1.55033	1.43088	0	0.708227	0.354113	0.247479	-2.01462	0.365304	0.626168	2.51607	1.57112	1.14732	0.198271	1	0.471869	0.335551	0.40371	1.14006	0.189109	1
Mycth_2063736	Protein kinase, core	42.9586	26.798	34.8783	34.6132	36.6227	35.6179	1.02121	0.0302734	0.771013	50.0535	41.3572	45.7054	35.0231	30.6382	32.8306	0.71831	-0.477321	0.221761	27.6817	24.5773	26.1295	0.733604	-0.446926	0.0107631	39.3806	40.257	39.8188	1.21286	0.278408	0.90135
Mycth_2063758	ESCRT-II complex, vps25 subunit	13.2804	9.85097	11.5657	7.33615	8.81132	8.07374	0.698077	-0.518542	0.402562	16.4708	11.2265	13.8486	8.82476	9.05508	8.93992	0.645545	-0.63141	0.23041	19.8377	14.5408	17.1892	2.12903	1.0902	0.00982675	19.3629	14.8069	17.0849	1.91108	0.93439	0.0926064
Mycth_2063854	Major facilitator superfamily	1.91599	2.71015	2.31307	1.67354	1.54523	1.60938	0.695779	-0.523299	0.689913	1.75173	1.2605	1.50612	1.41288	0.616956	1.01492	0.673864	-0.569471	0.718705	3.49103	12.544	8.01749	4.98171	2.31664	0.350127	2.11924	4.05334	3.08629	3.04092	1.60451	0.289965
Mycth_2063953		0	0	0	0	0	0	#DIV/0!	#DIV/0!	NA	0	0	0	0	0	0	#DIV/0!	#DIV/0!	NA	0	0	0	#DIV/0!	#DIV/0!	NA	0	0	0	#DIV/0!	#DIV/0!	NA
Mycth_2063966		10.5314	9.67944	10.1054	7.50876	8.01658	7.76267	0.768168	-0.380506	0.836732	10.3782	9.27631	9.82728	8.83905	7.3817	8.11037	0.825292	-0.277023	1	7.97674	4.18396	6.08035	0.783281	-0.352399	0.544653	4.85748	7.25382	6.05565	0.746655	-0.421486	0.358968
Mycth_2064081		8.78555	8.30301	8.54428	12.8386	13.5188	13.1787	1.5424	0.625178	0.0386385	7.10616	7.18715	7.14665	13.441	11.6833	12.5622	1.75777	0.813745	0.000256322	7.38907	7.92376	7.65641	0.580968	-0.783468	0.00640533	8.40923	8.00012	8.20468	0.653126	-0.614567	0.0107244
Mycth_2064169	Glycoside Hydrolase Family 43 protein	3.13327	3.28481	3.20904	6.53871	6.32324	6.43097	2.00402	1.00289	0.00021162	2.82988	3.31087	3.07038	3.24723	3.59215	3.41969	1.11377	0.15545	0.238716	12.8152	11.6077	12.2115	1.89885	0.925127	0.0156597	6.18629	7.49445	6.84037	2.00029	1.00021	0.0955593
Mycth_2064311	Integrase, catalytic core	0	0	0	0	0	0	#DIV/0!	#DIV/0!	NA	0	0	0	0	0	0	#DIV/0!	#DIV/0!	NA	0	0	0	#DIV/0!	#DIV/0!	NA	0	0	0	#DIV/0!	#DIV/0!	NA
Mycth_2064312		3.22342	0.786383	2.0049	2.44012	1.28222	1.86117	0.928311	-0.10732	1	1.66574	1.75037	1.70806	2.62558	1.19942	1.9125	1.11969	0.163101	0.810244	2.65111	1.96666	2.30889	1.24055	0.310984	0.969249	2.66378	3.40963	3.03671	1.58782	0.66705	0.856797
Mycth_2064349	Ribosomal protein S7e	355.538	383.414	369.476	377.2	377.03	377.115	1.02068	0.029524	0.713046	322.401	306.218	314.309	303.014	314.77	308.892	0.982764	-0.0250826	0.140994	571.183	555.471	563.327	1.49378	0.578969	0.141589	581.683	484.538	533.111	1.72588	0.787333	0.0341846
Mycth_2064467		24.3373	13.9876	19.1624	16.292	16.6285	16.4602	0.858983	-0.219298	0.885469	25.2847	21.8834	23.5841	16.1996	16.9574	16.5785	0.702954	-0.508498	0.162273	17.4103	10.8695	14.1399	0.859034	-0.219213	0.148774	24.7968	18.3736	21.5852	1.302	0.380728	0.87858
Mycth_2064480		6.80803	2.47073	4.63938	19.486	23.481	21.4835	4.63068	2.21122	4.78e-12	6.0477	6.39313	6.22042	24.6209	17.586	21.1035	3.39261	1.7624	1.18978e-06	5.99725	6.04171	6.01948	0.280191	-1.83552	7.20869e-12	9.70839	9.40336	9.55588	0.452811	-1.14302	0.000175083
Mycth_2064545		435.209	546.894	491.052	1446.58	1465.59	1456.09	2.96524	1.56815	1.48e-19	760.385	1009.8	885.092	1547.22	1602.91	1575.06	1.77955	0.831512	6.86514e-07	941.42	903.552	922.486	0.633537	-0.658499	0.000143031	2332.67	2290.72	2311.69	1.46768	0.553538	0.345894
Mycth_2064601		11.0827	13.563	12.3228	12.103	9.22999	10.6665	0.865589	-0.208246	0.938797	13.8953	10.063	11.9792	10.9966	9.46448	10.2305	0.854026	-0.227649	0.987111	29.5864	27.7859	28.6862	2.68937	1.42727	1.68928e-05	15.4945	13.5166	14.5055	1.41787	0.503723	0.687529
Mycth_2064609		95.1827	98.9965	97.0896	80.4314	77.8984	79.1649	0.81538	-0.294455	0.638343	133.889	138.508	136.198	109.964	101.25	105.607	0.775389	-0.367007	0.611732	93.0558	108.813	100.935	1.27499	0.350487	0.736662	122.298	140.82	131.559	1.24574	0.317005	0.996339
Mycth_2064613	Bacterial luciferase-like	4.59763	6.31801	5.45782	5.29361	5.29473	5.29417	0.970016	-0.0439194	0.95207	4.51916	4.9888	4.75398	3.37223	4.52212	3.94718	0.830289	-0.268315	1	5.29916	27.7762	16.5377	3.12375	1.64328	0.584262	4.43175	8.43412	6.43293	1.62976	0.704655	0.738728
Mycth_2064631	Major facilitator superfamily	6.24127	3.60619	4.92373	4.51327	5.34241	4.92784	1.00083	0.00120234	0.902354	5.39806	6.18066	5.78936	6.37213	5.57362	5.97288	1.0317	0.0450206	0.312728	5.54381	3.56739	4.5556	0.924462	-0.113313	0.496431	9.44669	6.2891	7.8679	1.31727	0.397552	0.889306
Mycth_2064750		0	0	0	0	0	0	#DIV/0!	#DIV/0!	NA	0	0	0	0	0	0	#DIV/0!	#DIV/0!	NA	0	0	0	#DIV/0!	#DIV/0!	NA	0	0	0	#DIV/0!	#DIV/0!	NA
Mycth_2064786		0	0	0	0	0	0	#DIV/0!	#DIV/0!	NA	0	0	0	0	0	0	#DIV/0!	#DIV/0!	NA	0	0	0	#DIV/0!	#DIV/0!	NA	0	0	0	#DIV/0!	#DIV/0!	NA
Mycth_2064798	Major facilitator superfamily MFS-1	0.113295	0.248754	0.181024	0.085764	0.115886	0.100825	0.556969	-0.84433	0.914949	0	0.138422	0.069211	0	0.126469	0.0632345	0.913649	-0.130289	1	0.0745438	0.0921637	0.0833538	0.826718	-0.274533	0.970315	0.33705	0.319572	0.328311	5.19196	2.37628	0.397069
Mycth_2064803	Short-chain dehydrogenase/reductase SDR	0.175926	0	0.0879631	0.0665879	0.17995	0.123269	1.40137	0.486837	0.995724	0.0606081	0	0.030304	0	0.130922	0.0654611	2.16014	1.11113	0.98195	0.289382	0.21467	0.252026	2.04453	1.03177	0.849259	0.116306	0.124059	0.120183	1.83594	0.876518	1
Mycth_2064824	Peptidase S33, prolyl aminopeptidase	0.102593	0	0.0512967	0.0776631	0	0.0388315	0.756998	-0.401638	1	0	0	0	0	0	0	#DIV/0!	#DIV/0!	NA	0	0.0417292	0.0208646	0.53731	-0.896173	0.995481	0.101738	0	0.0508689	#DIV/0!	#DIV/0!	0.862407
Mycth_2064829		1.14071	1.00183	1.07127	0	0.233359	0.11668	0.108917	-3.1987	0.490094	0.23579	0.55748	0.396635	1.0292	1.52802	1.27861	3.22365	1.6887	0.397918	0.225163	0.835155	0.530159	4.54372	2.18387	0.818312	0.452477	0.482642	0.46756	0.365677	-1.45136	0.510833
Mycth_2064854	SANT, DNA-binding	33.3087	23.0948	28.2017	25.5464	30.7829	28.1647	0.998685	-0.00189816	0.877285	24.1582	17.6707	20.9144	14.3344	13.6986	14.0165	0.670183	-0.577373	0.385944	4.90224	3.56528	4.23376	0.150322	-2.73388	7.16858e-14	3.33206	2.31795	2.82501	0.201549	-2.3108	1.66071e-07
Mycth_2064865	Hypothetical protein	0.239976	0.579589	0.409782	0.653981	0.490929	0.572455	1.39697	0.482304	0.788096	0.496043	0.234559	0.365301	0.595426	0.482186	0.538806	1.47496	0.560679	0.588678	1.37369	1.75695	1.56532	2.7344	1.45123	0.147246	0.618734	0.45691	0.537822	0.998174	-0.00263692	0.883332
Mycth_2064870	Dynactin p62	31.8954	22.7858	27.3406	23.442	19.8414	21.6417	0.791559	-0.337231	0.505539	35.3705	27.0179	31.1942	20.1268	20.8491	20.488	0.656788	-0.6065	0.047497	31.3696	18.8681	25.1189	1.16067	0.214957	0.930926	36.3834	23.9185	30.1509	1.47164	0.557426	0.422747
Mycth_2064932	Mandelate racemase/muconate lactonizing enzyme	5.38286	4.48161	4.93223	3.93807	3.21489	3.57648	0.725124	-0.4637	0.511701	6.60878	6.26772	6.43825	5.13374	3.42783	4.28079	0.664899	-0.588793	0.342017	1.14096	0.925736	1.03335	0.288928	-1.79122	2.79523e-05	4.80058	3.6685	4.23454	0.989196	-0.0156712	0.474622
Mycth_2064957	Glycosyltransferase Family 4 protein	1.61808	1.34309	1.48058	1.34438	1.41287	1.37863	0.931137	-0.102934	1	1.01971	0.771489	0.895599	1.02372	0.616761	0.820239	0.915855	-0.126809	0.948486	1.20745	1.05945	1.13345	0.822157	-0.282514	0.553645	0.430497	0.417451	0.423974	0.516891	-0.952069	0.23266
Mycth_2064976	Carbohydrate/puine kinase, PfkB, conserved site	0.35864	0.19686	0.27775	0.330878	0.298059	0.314469	1.1322	0.179129	0.928938	0.440163	0.356022	0.398093	0.1264	0.250215	0.188307	0.473023	-1.08002	0.486488	0.84065	0.683786	0.762218	2.42383	1.27729	0.192463	0.266736	0.569037	0.417887	2.21918	1.15002	0.579158
Mycth_2064998	Class II aldolase/adducin, N-terminal	0.49797	0.728906	0.613438	1.82199	2.26382	2.0429	3.33025	1.73563	0.00928346	1.20089	0.540812	0.870849	0.99843	0.926459	0.962445	1.10518	0.144282	0.766048	0.0546077	0.877699	0.466153	0.228182	-2.13174	0.00149806	0.164606	0.234105	0.199355	0.207134	-2.27136	0.0406362
Mycth_2065104		5.80556	5.27901	5.54229	3.39598	3.59899	3.49749	0.631055	-0.664162	0.165027	7.33358	5.26613	6.29985	2.71163	3.37125	3.04144	0.482779	-1.05057	0.00511995	7.72651	4.90163	6.31407	1.80532	0.852252	0.0665383	4.30332	3.03945	3.67138	1.20712	0.271572	0.955491
Mycth_2065208		2.13384	1.42839	1.78111	0.709161	0.638821	0.673991	0.37841	-1.40198	0.11876	1.66748	1.08099	1.37423	1.99569	2.03339	2.01454	1.46593	0.551821	0.217935	2.05461	0.825586	1.4401	2.13668	1.09537	0.316191	2.58054	1.87175	2.22614	1.10504	0.144096	0.862823
Mycth_2065222		34.7696	22.7741	28.7718	0.552952	0.398485	0.475718	0.0165342	-5.9184	1.29e-31	76.8029	58.5452	67.674	0.109842	0.108719	0.10928	0.00161481	-9.27442	4.70031e-101	0.192245	0.118843	0.155544	0.326966	-1.61279	0.54669	0	0.10302	0.05151	0.471356	-1.08511	0.969334
Mycth_2065241		13.3943	14.912	14.1532	16.4163	16.5036	16.46	1.16299	0.217838	0.272133	16.8953	16.0764	16.4858	18.2768	20.8852	19.581	1.18774	0.248224	0.00373629	11.7506	7.26407	9.50736	0.577605	-0.791846	0.000230202	12.5798	11.6443	12.1121	0.618564	-0.693004	1.38335e-05
Mycth_2065250	RNA-directed DNA polymerase (reverse transcriptase)	0	0	0	0	0	0	#DIV/0!	#DIV/0!	NA	0	0	0	0	0	0	#DIV/0!	#DIV/0!	NA	0	0	0	#DIV/0!	#DIV/0!	NA	0	0	0	#DIV/0!	#DIV/0!	NA
Mycth_2065257	MFS general substrate transporter	0.189254	0	0.0946269	0.429795	0.387164	0.408479	4.31673	2.10994	0.827565	0.391198	0	0.195599	0	0	0	0	#NUM!	0.906474	0	0	0	0	#NUM!	0.565981	0	0	0	#DIV/0!	#DIV/0!	NA
Mycth_2065342		0	0	0	0	0	0	#DIV/0!	#DIV/0!	NA	0	0	0	0	0	0	#DIV/0!	#DIV/0!	NA	0	0	0	#DIV/0!	#DIV/0!	NA	0	0	0	#DIV/0!	#DIV/0!	NA
Mycth_2065457		0.14482	0.317972	0.231396	0.164443	0.148132	0.156288	0.675412	-0.56616	1	0.149676	0.176939	0.163308	0.16333	0	0.0816651	0.500069	-0.9998	1	0.428789	0.176714	0.302751	1.93714	0.953929	0.957189	0.143612	0.306373	0.224993	2.75506	1.46209	0.985952
Mycth_2065465		4.71239	2.28141	3.4969	2.6256	2.60468	2.61514	0.747846	-0.419187	0.744898	5.41489	3.14697	4.28093	3.00396	1.79702	2.40049	0.560739	-0.834598	0.33722	3.11984	1.67863	2.39923	0.917439	-0.124316	0.594958	6.38558	2.47683	4.4312	1.84596	0.884372	0.606233
Mycth_2065658	Fungal transcriptional regulatory protein, N-terminal	5.23721	4.40795	4.82258	3.17165	3.82132	3.49648	0.725024	-0.4639	0.537543	6.06233	6.48407	6.2732	3.85898	3.74158	3.80028	0.605795	-0.723098	0.163919	4.0317	2.55624	3.29397	0.94208	-0.0860787	0.606129	9.03674	5.61362	7.32518	1.92754	0.946761	0.100454
Mycth_2065690	Serine/threonine protein kinase, active site	9.43077	9.36198	9.39638	8.65803	11.4936	10.0758	1.07231	0.100724	0.674378	8.39897	8.94823	8.6736	7.7508	9.18348	8.46714	0.976197	-0.0347554	0.490807	14.1595	12.181	13.1703	1.30711	0.386384	0.675052	5.22325	5.62452	5.42389	0.640581	-0.642548	0.00760002
Mycth_2065691	Carbohydrate-binding family 9/cellobiose dehydrogenase, cytochrome	22.0075	16.3245	19.166	13.9581	10.14	12.0491	0.628668	-0.669629	0.290373	20.9011	18.1679	19.5345	10.0623	16.3777	13.22	0.676752	-0.5633	0.533991	5.87033	2.90316	4.38674	0.364074	-1.4577	0.00556496	20.8409	16.3581	18.5995	1.40692	0.492539	0.814418
Mycth_2065718	Zinc finger, CCCH-type	31.1018	25.0993	28.1006	28.8342	27.5092	28.1717	1.00253	0.0036472	0.810265	31.1714	28.1134	29.6424	27.5439	25.8171	26.6805	0.90008	-0.151874	0.630715	35.865	28.8674	32.3662	1.14889	0.200243	0.997787	37.7871	32.2138	35.0004	1.31183	0.391585	0.855582
Mycth_2065741		87.4058	74.3006	80.8532	92.6771	81.9141	87.2956	1.07968	0.110604	0.560548	90.092	99.4312	94.7616	156.125	153.474	154.8	1.63357	0.708028	1.90474e-10	454.055	411.342	432.699	4.95671	2.30938	1.40484e-20	224.657	259.749	242.203	1.56462	0.645812	0.334005
Mycth_2065743		0.220296	0	0.110148	0.400232	0.991468	0.69585	6.31742	2.65934	0.167515	0.273217	0.269154	0.271186	1.24226	1.52465	1.38346	5.10151	2.35093	0.000813057	0.521807	0.161287	0.341547	0.490834	-1.02669	0.402945	0.567991	0.419439	0.493715	0.35687	-1.48653	0.0329848
Mycth_2065797	Peptidase A1; aspartic protease	0.757016	0.349921	0.553468	0.542898	0.285279	0.414089	0.74817	-0.418561	0.90554	0.658859	0.292077	0.475468	0	0.133428	0.0667139	0.140312	-2.83329	0.118115	0.353905	0.243087	0.298496	0.720851	-0.472228	0.723079	0.395106	0.0421446	0.218625	3.27705	1.7124	0.737474
Mycth_2065815		0	0	0	0	0	0	#DIV/0!	#DIV/0!	NA	0	0	0	0	0	0	#DIV/0!	#DIV/0!	NA	0	0	0	#DIV/0!	#DIV/0!	NA	0	0	0	#DIV/0!	#DIV/0!	NA
Mycth_2065824	Class I peptide chain release factor	13.9213	11.9076	12.9145	12.2194	9.60961	10.9145	0.845137	-0.242744	0.858474	18.3602	15.548	16.9541	13.1962	15.6355	14.4159	0.850287	-0.233978	0.98195	13.2338	11.0469	12.1404	1.11231	0.153564	0.973262	18.5481	16.171	17.3595	1.2042	0.268072	0.928777
Mycth_2065851	Glycoside Hydrolase Family 16 protein	0.0616827	0	0.0308414	0.140081	0.0630934	0.101587	3.29386	1.71978	0.924715	0.127501	0	0.0637507	0.2087	0.344277	0.276488	4.33702	2.1167	0.437882	0	0	0	0	#NUM!	0.698812	0	0	0	0	#NUM!	0.204912
Mycth_2066181	Fungal transcriptional regulatory protein, N-terminal	12.1672	7.48388	9.82552	10.6803	10.3491	10.5147	1.07014	0.0978024	0.636955	14.6486	13.0997	13.8742	12.9437	11.7518	12.3477	0.889981	-0.168153	0.730171	14.9039	9.73987	12.3219	1.17187	0.228817	0.911211	13.5632	10.4968	12.03	0.974268	-0.0376101	0.198716
Mycth_2066192		0	0	0	0	0	0	#DIV/0!	#DIV/0!	NA	0	0	0	0	0	0	#DIV/0!	#DIV/0!	NA	0	0	0	#DIV/0!	#DIV/0!	NA	0	0	0	#DIV/0!	#DIV/0!	NA
Mycth_2066229		0	0	0	0	0	0	#DIV/0!	#DIV/0!	NA	0	0	0	0	0	0	#DIV/0!	#DIV/0!	NA	0	0	0	#DIV/0!	#DIV/0!	NA	0	0	0	#DIV/0!	#DIV/0!	NA
Mycth_2066239	Redoxin	118.499	124.538	121.518	81.1884	80.8058	80.9971	0.666543	-0.58523	0.0960975	102.555	102.379	102.467	84.1792	85.168	84.6736	0.826347	-0.27518	0.982601	78.9144	71.819	75.3667	0.930486	-0.103944	0.291993	63.9865	60.9658	62.4761	0.737847	-0.438607	0.00104737
Mycth_2066269		0.832717	0.799898	0.816308	1.06374	1.49058	1.27716	1.56456	0.645756	0.700186	0.968214	1.5261	1.24716	0.939149	1.04574	0.992445	0.795765	-0.329586	1	0.616384	0	0.308192	0.24131	-2.05104	0.15419	2.27087	0.110103	1.19049	1.19955	0.262493	1
Mycth_2066278		0	0	0	0	0	0	#DIV/0!	#DIV/0!	NA	0	0	0	0	0	0	#DIV/0!	#DIV/0!	NA	0	0	0	#DIV/0!	#DIV/0!	NA	0	0	0	#DIV/0!	#DIV/0!	NA
Mycth_2066299		0	0	0	0	0	0	#DIV/0!	#DIV/0!	NA	0	0	0	0	0	0	#DIV/0!	#DIV/0!	NA	0	0	0	#DIV/0!	#DIV/0!	NA	0	0	0	#DIV/0!	#DIV/0!	NA
Mycth_2066367	Spindle associated	15.5976	7.19587	11.3967	11.4985	9.66013	10.5793	0.928276	-0.107374	1	14.3785	9.70822	12.0433	9.17273	8.52645	8.84959	0.734812	-0.444554	0.487158	8.84557	5.69672	7.27114	0.687299	-0.540991	0.00696659	12.496	9.19733	10.8467	1.22567	0.29357	0.955125
Mycth_2066447		26.063	24.457	25.26	43.6753	41.6294	42.6523	1.68853	0.755771	6.35e-05	29.6193	26.382	28.0006	31.9554	33.2384	32.5969	1.16415	0.219277	0.00608069	25.9006	24.5449	25.2227	0.591356	-0.7579	9.72649e-05	33.853	34.0889	33.971	1.04215	0.0595683	0.324536
Mycth_2066457	acetylxylan esterase	1.95622	2.728	2.34211	2.94171	2.21728	2.57949	1.10135	0.139279	0.813762	1.91252	2.1317	2.02211	3.16031	3.71819	3.43925	1.70082	0.766232	0.0275345	7.40966	4.58054	5.9951	2.32414	1.21669	0.0209867	3.09337	2.79626	2.94481	0.856237	-0.223918	0.347416
Mycth_2066475	Epoxide hydrolase-like	16.2592	16.9199	16.5895	1.98725	1.7324	1.85982	0.112108	-3.15703	7.43e-18	36.5843	21.7965	29.1904	3.37457	3.65517	3.51487	0.120412	-3.05395	7.88699e-07	8.1906	13.2266	10.7086	5.75785	2.52553	0.0178377	4.64671	5.19535	4.92103	1.40006	0.48549	0.834029
Mycth_2066477		0	0	0	0	0	0	#DIV/0!	#DIV/0!	NA	0	0	0	0	0	0	#DIV/0!	#DIV/0!	NA	0	0	0	#DIV/0!	#DIV/0!	NA	0	0	0	#DIV/0!	#DIV/0!	NA
Mycth_2066488	Peptidase, cysteine peptidase active site	1.05929	0.88602	0.972653	0.715963	0.627749	0.671856	0.690746	-0.533774	0.441051	0.981845	1.19151	1.08668	0.635265	0.412924	0.524094	0.482292	-1.05202	0.0988763	0.696972	0.451374	0.574173	0.854607	-0.226667	0.46425	0.641942	0.533562	0.587752	1.12146	0.165382	0.841106
Mycth_2066622	Cytochrome b-245, heavy chain	198.455	188.344	193.399	134.352	130.01	132.181	0.683462	-0.549067	0.0649655	230.986	213.306	222.146	114.66	107.566	111.113	0.500181	-0.999479	2.71927e-08	293.754	274.453	284.103	2.14935	1.1039	6.39615e-05	207.206	162.319	184.762	1.66283	0.733642	0.0659292
Mycth_2066662	O-methyltransferase, family 2	1.47147	1.54197	1.50672	1.63287	1.29988	1.46638	0.973223	-0.0391573	0.981	1.62449	1.63438	1.62944	1.20694	1.11994	1.16344	0.714012	-0.485979	0.772036	3.9607	4.61124	4.28597	2.92283	1.54737	0.00204644	1.62501	2.29933	1.96217	1.68653	0.754058	0.565815
Mycth_2066697	Pyruvate kinase, barrel	82.3484	99.5841	90.9663	70.281	71.8095	71.0453	0.781007	-0.356593	0.733288	88.2655	86.0561	87.1608	79.5173	81.5584	80.5378	0.924014	-0.114014	0.3865	75.0526	73.4239	74.2382	1.04494	0.063424	0.63523	89.1798	90.3359	89.7578	1.11448	0.156371	0.511524
Mycth_2066841	Serine/threonine protein kinase, active site	5.04013	3.65668	4.3484	3.4836	4.12432	3.80396	0.874794	-0.192985	0.953283	5.39029	4.01606	4.70318	4.05317	3.66927	3.86122	0.820981	-0.284579	0.973533	4.80131	3.15527	3.97829	1.04583	0.0646476	0.851632	4.6504	4.96042	4.80541	1.24453	0.315603	1
Mycth_2066922	RNA-directed DNA polymerase (reverse transcriptase)	0	0	0	0	0	0	#DIV/0!	#DIV/0!	NA	0	0	0	0	0	0	#DIV/0!	#DIV/0!	NA	0	0	0	#DIV/0!	#DIV/0!	NA	0	0	0	#DIV/0!	#DIV/0!	NA
Mycth_2066939	Tyrosinase-like protein	0	0	0	0	0	0	#DIV/0!	#DIV/0!	NA	0	0	0	0	0	0	#DIV/0!	#DIV/0!	NA	0.0463012	0	0.0231506	#DIV/0!	#DIV/0!	1	0	0	0	#DIV/0!	#DIV/0!	NA
Mycth_2067021	GCN5-related N-acetyltransferase	6.08125	5.46226	5.77176	4.31578	3.95839	4.13709	0.716781	-0.480395	0.605199	7.42789	4.72817	6.07803	3.11751	3.00849	3.063	0.503946	-0.988658	0.0951647	7.50232	5.22809	6.36521	1.53857	0.621593	0.411034	6.4417	4.23964	5.34067	1.74361	0.802075	0.440841
Mycth_2067028		0	0	0	0	0	0	#DIV/0!	#DIV/0!	NA	0	0	0	0	0	0	#DIV/0!	#DIV/0!	NA	0	0	0	#DIV/0!	#DIV/0!	NA	0	0	0	#DIV/0!	#DIV/0!	NA
Mycth_2067066		0	0	0	0	0	0	#DIV/0!	#DIV/0!	NA	0	0	0	0	0	0	#DIV/0!	#DIV/0!	NA	0	0	0	#DIV/0!	#DIV/0!	NA	0	0	0	#DIV/0!	#DIV/0!	NA
Mycth_2067101	HMG-I and HMG-Y, DNA-binding	0.0381106	0.0627576	0.0504341	0.0432745	0.0584733	0.0508739	1.00872	0.0125255	1	0.157553	0.116408	0.13698	0.0429816	0.0425422	0.0427619	0.312176	-1.67957	0.527211	0.206872	0.139511	0.173191	3.40433	1.76737	0.428266	0.245653	0.201561	0.223607	5.22911	2.38657	0.286416
Mycth_2067166	SKP1 component	0.0920129	0	0.0460065	0	0.0941173	0.0470586	1.02287	0.0326225	1	0	0.33726	0.16863	0	0.205425	0.102712	0.609099	-0.715251	1	0	0.224554	0.112277	2.38589	1.25453	1	0	0.0973283	0.0486642	0.47379	-1.07768	0.969334
Mycth_2067168		5.8061	5.78695	5.79652	9.02174	10.0805	9.55111	1.64773	0.720481	0.0362979	6.63242	5.32036	5.97639	10.4254	9.55131	9.98836	1.6713	0.740975	0.00253329	4.29772	4.9407	4.61921	0.483631	-1.04802	0.0020467	5.68191	6.78798	6.23495	0.624221	-0.679871	0.0123454
Mycth_2067210	Cytochrome b5	46.1123	41.6925	43.9024	55.0386	57.7031	56.3708	1.284	0.360649	0.0578593	36.1168	30.9337	33.5253	58.3575	56.149	57.2532	1.70776	0.772109	4.44085e-11	34.9641	36.8265	35.8953	0.63677	-0.651155	0.000497599	29.0691	24.7445	26.9068	0.469961	-1.08939	1.42078e-10
Mycth_2067244	Fungal transcriptional regulatory protein, N-terminal	6.79983	3.76693	5.28338	4.46641	4.109	4.2877	0.811546	-0.301256	0.794952	11.4607	6.18621	8.82346	5.40364	4.97471	5.18918	0.588111	-0.765839	0.338828	3.40715	1.60841	2.50778	0.584877	-0.773795	0.00770717	12.7185	6.04182	9.38018	1.80764	0.854109	0.443809
Mycth_2067245	DNA/RNA helicase, C-terminal	5.08202	2.44227	3.76215	2.6188	2.65132	2.63506	0.700413	-0.513722	0.654342	4.05005	3.21678	3.63342	2.27882	1.75429	2.01655	0.555003	-0.849434	0.0604192	6.90914	5.62843	6.26878	2.37899	1.25035	0.000983135	4.9182	2.80654	3.86237	1.91533	0.937593	0.218638
Mycth_2067358	chitinase	0.715461	0.523629	0.619545	0.270801	0.365912	0.318357	0.513855	-0.960566	0.626678	0.451885	0.388507	0.420196	0.268969	0.0443698	0.156669	0.372848	-1.42334	0.486183	1.84376	0.630519	1.23714	3.88602	1.95829	0.166026	1.81315	0.588616	1.20088	7.66508	2.9383	0.127288
Mycth_2067387		0	0	0	0	0	0	#DIV/0!	#DIV/0!	NA	0	0	0	0	0	0	#DIV/0!	#DIV/0!	NA	0	0	0	#DIV/0!	#DIV/0!	NA	0	0.704657	0.352329	#DIV/0!	#DIV/0!	0.938378
Mycth_2067418	Inositol monophosphatase	4.32516	3.32922	3.82719	1.41127	1.57639	1.49383	0.390321	-1.35727	0.0144536	3.85359	3.7659	3.80975	1.28958	1.66486	1.47722	0.387747	-1.36681	0.0215753	3.04206	2.24453	2.64329	1.76947	0.823321	0.350262	8.67676	6.57329	7.62503	5.16174	2.36786	3.37521e-06
Mycth_2067426		9.51441	7.6211	8.56775	0.674054	0.97826	0.826157	0.0964263	-3.37443	4.52e-33	21.8312	17.3663	19.5987	1.74812	1.95113	1.84962	0.0943746	-3.40546	2.70102e-65	3.14091	2.61572	2.87832	3.48398	1.80074	4.38625e-05	0.359742	0.366282	0.363012	0.196263	-2.34914	1.14863e-08
Mycth_2067458	Beta-Ig-H3/fasciclin	0.228142	0.35064	0.289391	0.310865	0.233359	0.272112	0.940292	-0.0888188	1	0.518739	0.167244	0.342991	0.411682	0.458407	0.435044	1.26838	0.34299	0.758792	1.03575	0.723801	0.879776	3.23314	1.69293	0.197663	0.99545	0.193057	0.594254	1.36596	0.449916	0.987033
Mycth_2067470	Mitochondrial substrate carrier	6.53942	4.23514	5.38728	4.32708	4.1385	4.23279	0.785702	-0.347946	0.734569	5.98068	5.46063	5.72066	5.67734	6.45957	6.06845	1.0608	0.0851482	0.342309	6.17545	1.72221	3.94883	0.932914	-0.100184	0.835746	18.1017	9.6542	13.8779	2.2869	1.19339	0.125586
Mycth_2067496	NUDIX	10.1908	8.49427	9.34251	9.48227	7.96264	8.72245	0.93363	-0.0990767	1	10.6299	11.8745	11.2522	10.6419	8.21583	9.42887	0.837957	-0.255052	0.999503	17.2285	7.13864	12.1836	1.3968	0.482131	0.696128	18.8547	12.077	15.4659	1.64027	0.71393	0.302579
Mycth_2067533	Phosphoglycerate mutase	1.76423	2.24669	2.00546	2.40394	1.94895	2.17644	1.08526	0.118038	0.884977	5.61601	5.34567	5.48084	6.12834	5.19916	5.66375	1.03337	0.0473619	0.513746	11.8401	12.486	12.1631	5.58853	2.48247	2.44027e-08	12.4566	11.8687	12.1626	2.14745	1.10262	0.0544297
Mycth_2067613	Glycine hydroxymethyltransferase	79.2374	54.5852	66.9113	127.365	125.313	126.339	1.88816	0.916978	1.92e-07	85.3507	70.5651	77.9579	96.8704	95.0717	95.971	1.23106	0.299903	0.000132228	160.558	131.189	145.873	1.15462	0.207416	0.983573	181.088	131.594	156.341	1.62905	0.704029	0.0958773
Mycth_2067632	Hypothetical protein	6.86259	11.3008	9.08169	13.3042	12.4126	12.8584	1.41586	0.501678	0.32845	8.30361	5.62383	6.96372	13.2142	9.15534	11.1847	1.60615	0.683602	0.0306023	14.785	14.7054	14.7452	1.14674	0.197535	1	15.3535	7.34756	11.3505	1.01482	0.0212292	0.691868
Mycth_2067689	Pyruvate kinase, barrel	326.617	351.331	338.974	292.236	293.766	293.001	0.864376	-0.210269	0.87297	323.45	338.744	331.097	299.311	299.194	299.253	0.903822	-0.145889	0.517867	331.695	344.16	337.927	1.15333	0.205809	1	359.181	386.167	372.674	1.24535	0.31655	0.992308
Mycth_2067725	Tetrapyrrole biosynthesis, uroporphyrinogen III synthase	82.9307	80.5593	81.745	61.7672	56.9779	59.3725	0.726314	-0.461334	0.216018	83.7136	82.0866	82.9001	56.6694	59.3895	58.0295	0.699993	-0.514588	0.163735	67.8233	62.6309	65.2271	1.09861	0.135676	0.865945	64.9907	74.6143	69.8025	1.20288	0.266493	0.878991
Mycth_2067839	Hypothetical protein	0.915074	2.07614	1.49561	0.900522	1.248	1.07426	0.718279	-0.477383	0.912307	1.0088	0.521744	0.765274	0.34401	0.953382	0.648696	0.847666	-0.238432	1	0.842919	1.78656	1.31474	1.22385	0.29143	1	0.725953	2.06493	1.39544	2.15115	1.10511	0.703771
Mycth_2067869	Peptidase C54	36.8072	30.9657	33.8865	25.3663	27.4353	26.4008	0.779096	-0.360127	0.487047	40.0751	31.1677	35.6214	27.784	28.3136	28.0488	0.787415	-0.344805	0.690681	15.8974	19.2993	17.5984	0.666584	-0.585141	0.00214873	38.4517	39.5502	39.001	1.39047	0.475571	0.631399
Mycth_2067902		6.04898	5.26079	5.65489	3.3897	3.69632	3.54301	0.62654	-0.674522	0.393619	3.73483	2.20757	2.9712	2.30357	3.50773	2.90565	0.977938	-0.0321851	0.808005	1.39559	2.68405	2.03982	0.57573	-0.796535	0.10777	3.03822	3.57314	3.30568	1.13767	0.186086	0.900771
Mycth_2067913		0.464772	0.935429	0.700101	0.351832	0.713102	0.532467	0.760558	-0.39487	0.97715	0.88065	0.47321	0.67693	0.960989	0.518817	0.739903	1.09303	0.12833	0.867807	3.59319	1.79591	2.69455	5.06049	2.33928	0.0132285	2.68856	1.63874	2.16365	2.92423	1.54806	0.24201
Mycth_2067982	Chloroperoxidase	0	0	0	0	0	0	#DIV/0!	#DIV/0!	NA	0	0	0	0	0	0	#DIV/0!	#DIV/0!	NA	0.188209	0	0.0941045	#DIV/0!	#DIV/0!	0.789446	0.063036	0	0.031518	#DIV/0!	#DIV/0!	1
Mycth_2068129		0.0484138	0.0265747	0.0374942	0	0.0742815	0.0371407	0.990572	-0.0136662	1	0.0750554	0	0.0375277	0.0273008	0.0270217	0.0271613	0.723767	-0.466404	1	0.119454	0.0590759	0.0892651	2.40343	1.26509	0.826618	0.28806	0.0256053	0.156833	5.77412	2.5296	0.576281
Mycth_2068188	Ribosomal protein S2	4.26708	2.6219	3.44449	5.42379	4.95096	5.18738	1.50599	0.590715	0.0666619	5.1671	3.77392	4.47051	7.14687	6.75388	6.95037	1.55472	0.636652	0.000726938	6.66276	3.57483	5.11879	0.986779	-0.0192017	0.698672	5.02094	3.90728	4.46411	0.642283	-0.638718	0.00370644
Mycth_2068307		0.396532	0.158298	0.277415	7.24511	6.6371	6.9411	25.0207	4.64505	1.75e-29	0.745138	0.308304	0.526721	8.86296	10.0198	9.44138	17.9248	4.16389	2.69848e-41	0.675977	0.307911	0.491944	0.070874	-3.8186	3.40345e-20	0.893692	0.571962	0.732827	0.0776186	-3.68745	5.05497e-27
Mycth_2068390		0	0.716996	0.358498	0	1.00207	0.501036	1.3976	0.482949	1	0.337504	0	0.168752	0.368294	0.364528	0.366411	2.1713	1.11856	0.98195	0	0.398473	0.199236	0.397649	-1.33043	0.870265	0.647664	1.03626	0.841962	2.29786	1.20029	0.948155
Mycth_2068429		0	0	0	0.310016	0	0.155008	#DIV/0!	#DIV/0!	1	0	0.333574	0.166787	0	0	0	0	#NUM!	1	0	0	0	0	#NUM!	1	0.270745	0.866382	0.568563	#DIV/0!	#DIV/0!	0.733934
Mycth_2068493	7,8-Dihydro-6-hydroxymethylpterin-pyrophosphokinase, HPPK	35.0327	27.6333	31.333	30.7352	32.448	31.5916	1.00825	0.0118588	0.788096	31.9664	31.8912	31.9288	25.9384	23.4408	24.6896	0.773269	-0.370958	0.63884	39.2376	34.1647	36.7011	1.16174	0.216283	0.982583	40.9637	37.7495	39.3566	1.59406	0.672704	0.183296
Mycth_2068637		5.95889	6.20629	6.08259	6.67956	7.73618	7.20787	1.185	0.244887	0.555205	5.68493	5.78706	5.73599	7.58212	8.27212	7.92712	1.382	0.466754	0.0494373	5.8811	4.47459	5.17784	0.71836	-0.477221	0.155869	3.40915	5.41422	4.41169	0.556531	-0.845467	0.00806142
Mycth_2068645		0	0	0	0	0	0	#DIV/0!	#DIV/0!	NA	0	0	0	0	0	0	#DIV/0!	#DIV/0!	NA	0	0	0	#DIV/0!	#DIV/0!	NA	0	0	0	#DIV/0!	#DIV/0!	NA
Mycth_2068755	Carbohydrate Esterase Family 4 protein	3.65638	2.56995	3.11317	3.54422	3.53475	3.53949	1.13694	0.185158	0.582117	3.13377	3.35048	3.24212	3.46995	2.96161	3.21578	0.991874	-0.0117716	0.47674	2.46444	1.52348	1.99396	0.563346	-0.827906	0.00802098	3.55955	2.35829	2.95892	0.920126	-0.120097	0.290326
Mycth_2068800	DNA-binding HORMA	14.134	11.1219	12.6279	10.0447	12.2836	11.1641	0.884081	-0.17775	0.949033	13.1266	10.3853	11.756	8.58332	9.76439	9.17385	0.780357	-0.357794	0.773963	13.0715	8.86454	10.968	0.982434	-0.0255681	0.594958	17.2015	11.3435	14.2725	1.55578	0.637641	0.39206
Mycth_2068812	Protein of unknown function DUF1077	59.6479	54.4527	57.0503	49.9496	48.9763	49.4629	0.867006	-0.205887	0.87498	66.2315	50.8701	58.5508	55.3281	56.3791	55.8536	0.953934	-0.0680381	0.40623	61.7277	58.2052	59.9665	1.21235	0.277808	0.851632	66.331	63.5723	64.9517	1.16289	0.217716	0.757097
Mycth_2068912		0.0494194	0	0.0247097	0.0561156	0.0505496	0.0533326	2.15837	1.10994	1	0	0.0603799	0.03019	0.0557358	0.055166	0.0554509	1.83673	0.877143	0.982284	0	0.060303	0.0301515	0.565348	-0.822789	0.995402	0.0980144	0	0.0490072	0.883794	-0.178218	1
Mycth_2068961		0.961371	0.558745	0.760058	0.481603	0.37599	0.428797	0.564163	-0.825817	0.532086	1.28584	0.863669	1.07475	0.223227	0.220945	0.222086	0.206639	-2.27481	0.00699117	1.45114	1.48362	1.46738	3.42208	1.77487	0.0186572	0.588835	0.329	0.458917	2.06639	1.04712	0.646083
Mycth_2068997		8.47996	7.88367	8.18181	12.2314	13.8314	13.0314	1.59272	0.671497	0.0261207	8.44843	8.58724	8.51784	13.0964	13.73	13.4132	1.57472	0.655094	0.00131652	7.69067	8.94918	8.31992	0.638453	-0.647347	0.0183331	7.27285	8.24255	7.7577	0.578363	-0.789953	0.00173783
Mycth_2069012	Integrase, catalytic core	0	0	0	0	0	0	#DIV/0!	#DIV/0!	NA	0	0	0	0	0	0	#DIV/0!	#DIV/0!	NA	0	0	0	#DIV/0!	#DIV/0!	NA	0	0	0	#DIV/0!	#DIV/0!	NA
Mycth_2069029		6.41727	5.95468	6.18598	9.10849	7.03289	8.07069	1.30468	0.383691	0.34826	4.10578	5.13368	4.61973	7.06515	7.931	7.49808	1.62306	0.698713	0.00986978	5.5041	3.35594	4.43002	0.548903	-0.865378	0.0203959	3.78794	5.09099	4.43946	0.59208	-0.756135	0.0172626
Mycth_2069031	Hypothetical protein	0.408195	0	0.204097	0.278102	0.334024	0.306063	1.49959	0.584572	0.937056	0.168752	0	0.084376	0.27622	0.0911321	0.183676	2.17688	1.12226	0.848332	0.161146	0	0.0805731	0.263256	-1.92546	0.597783	0.40479	0.086355	0.245572	1.33699	0.418984	1
Mycth_2069072		5.95889	6.12242	6.04066	8.41451	8.98647	8.70049	1.44032	0.526391	0.151352	4.73744	5.50704	5.12224	7.75444	9.29548	8.52496	1.6643	0.734918	0.00446452	4.97631	5.03392	5.00511	0.575268	-0.797694	0.018341	5.30312	5.73746	5.52029	0.647545	-0.626948	0.0273292
Mycth_2069148		0	0	0	0	0	0	#DIV/0!	#DIV/0!	NA	0	0	0	0	0	0	#DIV/0!	#DIV/0!	NA	0	0	0	#DIV/0!	#DIV/0!	NA	0	0	0	#DIV/0!	#DIV/0!	NA
Mycth_2069159	Amino acid permease-associated region	0.188337	0.059074	0.123705	2.50517	1.67875	2.09196	16.9108	4.07988	3.18e-08	0.194651	0.13149	0.16307	0.0910322	0.120135	0.105584	0.647474	-0.627106	0.935099	0.13277	0.393967	0.263368	0.125895	-2.9897	2.32393e-06	0.0800425	0.0853785	0.0827105	0.783363	-0.352246	0.885913
Mycth_2069178	Zinc finger, RING-type	31.3777	28.6175	29.9976	12.6073	19.0103	15.8088	0.527002	-0.924119	0.0648661	54.8811	48.0685	51.4748	78.6707	63.8559	71.2633	1.38443	0.469293	0.00186803	156.27	224.427	190.348	12.0406	3.58984	0.000102204	59.8385	70.721	65.2798	0.916036	-0.126523	0.163136
Mycth_2069203		57.1182	49.162	53.1401	32.3588	31.4205	31.8896	0.600105	-0.736714	0.0110846	54.5706	51.3976	52.9841	38.4007	34.5654	36.4831	0.688566	-0.538333	0.161433	44.7449	43.4291	44.087	1.38249	0.467266	0.402494	61.1682	64.9198	63.044	1.72804	0.789133	0.0694435
Mycth_2069205	Lipase, active site	30.4409	38.1574	34.2991	25.7969	25.0868	25.4419	0.741765	-0.430965	0.662974	40.2916	34.0533	37.1725	27.0374	27.778	27.4077	0.737312	-0.439652	0.296598	27.0804	53.5118	40.2961	1.58385	0.663435	0.698812	27.8615	34.6167	31.2391	1.13979	0.188769	0.741994
Mycth_2069219	RNA-directed DNA polymerase (reverse transcriptase)	0	0	0	0	0	0	#DIV/0!	#DIV/0!	NA	0	0	0	0	0	0	#DIV/0!	#DIV/0!	NA	0	0	0	#DIV/0!	#DIV/0!	NA	0	0	0	#DIV/0!	#DIV/0!	NA
Mycth_2069347	Glycosyltransferase Family 59 protein	5.73247	4.63709	5.18478	3.32312	2.80834	3.06573	0.591294	-0.758052	0.0923999	5.83111	4.82897	5.33004	2.89231	2.69434	2.79332	0.524071	-0.932164	0.0322514	3.12659	1.87759	2.50209	0.816146	-0.2931	0.339436	2.81241	3.15947	2.98594	1.06896	0.0962022	0.687059
Mycth_2069363		0	0	0	0	0	0	#DIV/0!	#DIV/0!	NA	0	0	0	0	0	0	#DIV/0!	#DIV/0!	NA	0	0	0	#DIV/0!	#DIV/0!	NA	0	0	0	#DIV/0!	#DIV/0!	NA
Mycth_2069453	RNA-directed DNA polymerase (reverse transcriptase)	0	0	0	0	0	0	#DIV/0!	#DIV/0!	NA	0	0	0	0	0	0	#DIV/0!	#DIV/0!	NA	0	0	0	#DIV/0!	#DIV/0!	NA	0	0	0	#DIV/0!	#DIV/0!	NA
Mycth_2069574	PHP, C-terminal	21.2719	24.207	22.7394	23.3883	22.1829	22.7856	1.00203	0.00292743	0.833142	25.8995	22.8202	24.3599	20.3043	21.3709	20.8376	0.855408	-0.225315	0.935021	37.7383	38.8716	38.3049	1.6811	0.749406	0.0529447	36.3751	38.2513	37.3132	1.79066	0.840495	0.0551692
Mycth_2069662	Protein of unknown function DUF1962	0.701235	0.769827	0.735531	0.398126	0.179318	0.288722	0.392535	-1.34911	0.813601	0.905931	0	0.452966	0.593146	0.391388	0.492267	1.08677	0.120041	1	1.38416	1.2835	1.33383	4.61978	2.20782	0.379397	0.869233	1.11262	0.990925	2.01298	1.00933	0.873242
Mycth_2069697	Protein of unknown function UPF0057	0	1.28305	0.641523	0.995314	0.597727	0.79652	1.24161	0.312211	0.992567	0	0.356983	0.178492	0.988577	0	0.494289	2.76926	1.4695	0.839094	0.576734	1.06958	0.823159	1.03344	0.0474598	1	0.869233	1.23624	1.05274	2.1298	1.09072	0.919019
Mycth_2069736	Alcohol dehydrogenase GroES-like	0.427034	0.156268	0.291651	0	0	0	0	#NUM!	0.734569	0.147117	0.173915	0.160516	0	0	0	0	#NUM!	0.892232	0.140486	0	0.0702432	#DIV/0!	#DIV/0!	1	0.56463	0.150568	0.357599	#DIV/0!	#DIV/0!	0.666281
Mycth_2069804		0	0	0	0	0	0	#DIV/0!	#DIV/0!	NA	0	0	0	0	0	0	#DIV/0!	#DIV/0!	NA	0	0	0	#DIV/0!	#DIV/0!	NA	0	0	0	#DIV/0!	#DIV/0!	NA
Mycth_2069815	Ethyl tert-butyl ether degradation EthD	124.295	89.5349	106.915	1072.5	1089.38	1080.94	10.1103	3.33775	1.14e-68	59.7382	48.177	53.9576	629.368	645.215	637.292	11.811	3.56206	3.91715e-148	38.1916	46.7707	42.4812	0.0393002	-4.66932	3.08662e-86	9.10777	12.6942	10.901	0.0171052	-5.86942	1.56012e-144
Mycth_2069839	Metal-dependent phosphohydrolase, HD region	8.84762	9.64163	9.24463	4.13677	4.05917	4.09797	0.443282	-1.1737	0.00553322	11.4975	7.71	9.60377	5.57619	6.10016	5.83818	0.607905	-0.718083	0.185147	7.19115	7.22387	7.20751	1.7588	0.81459	0.201295	6.77391	6.46853	6.62122	1.13412	0.181579	0.825976
Mycth_2069908		4.27924	4.06298	4.17111	3.0205	2.366	2.69325	0.645692	-0.631082	0.624345	4.66177	3.81526	4.23851	3.00006	2.71118	2.85562	0.673731	-0.569755	0.712454	2.2829	4.51602	3.39946	1.26222	0.335958	0.968236	4.47293	4.40411	4.43852	1.55431	0.636274	0.766902
Mycth_2069956	Alpha/beta hydrolase fold-3	9.91559	9.1417	9.52864	5.9575	6.69593	6.32671	0.663968	-0.590815	0.249024	11.6907	10.7033	11.197	8.74005	9.18801	8.96403	0.800574	-0.320893	0.889524	20.1898	16.3282	18.259	2.88602	1.52908	1.11768e-05	8.78277	7.02621	7.90449	0.8818	-0.181476	0.171521
Mycth_2070001	D-alanine--D-alanine ligase/VANA/B/C, conserved site	159.425	118.316	138.871	12.9009	12.7881	12.8445	0.0924924	-3.43452	1.81e-58	124.45	105.81	115.13	17.3935	17.8779	17.6357	0.153181	-2.70669	1.13833e-59	15.7164	14.1976	14.957	1.16447	0.219672	0.983573	1.35743	1.11008	1.23375	0.0699577	-3.83737	2.49702e-36
Mycth_2070048		0	0	0	0	0	0	#DIV/0!	#DIV/0!	NA	0	0	0	0	0	0	#DIV/0!	#DIV/0!	NA	0.926023	0.286227	0.606125	#DIV/0!	#DIV/0!	0.55709	0.465223	0	0.232612	#DIV/0!	#DIV/0!	0.955491
Mycth_2070109		6.32248	7.11021	6.71635	2.97673	3.15467	3.0657	0.456453	-1.13146	0.175048	11.6345	8.28994	9.96222	4.34791	3.78705	4.06748	0.40829	-1.29233	0.0473088	5.47897	3.01068	4.24483	1.38462	0.46949	0.79173	6.42267	7.66641	7.04454	1.73192	0.792371	0.58306
Mycth_2070186		0	0	0	0	0	0	#DIV/0!	#DIV/0!	NA	0	0	0	0	0	0	#DIV/0!	#DIV/0!	NA	0	0	0	#DIV/0!	#DIV/0!	NA	0	0	0	#DIV/0!	#DIV/0!	NA
Mycth_2070221	Lipocalin	0.370685	0.755752	0.563219	0.330716	0.460411	0.395564	0.702327	-0.509784	0.885469	0.930416	0.776396	0.853406	0.268755	0.206895	0.237825	0.278677	-1.84333	0.0486339	0.522636	0.193852	0.358244	0.905654	-0.142969	0.851632	0.446363	0.308077	0.37722	1.58613	0.665509	0.875621
Mycth_2070352		0.247517	0.271728	0.259622	0.281055	0.217009	0.249032	0.959209	-0.0600832	1	0.07309	0.0864035	0.0797468	0.0797578	0.236827	0.158293	1.98494	0.989096	0.663792	0.523469	0.215734	0.369601	1.48415	0.569638	0.843123	0.175323	0.224413	0.199868	1.26265	0.336454	1
Mycth_2070469		6.41727	5.70308	6.06017	8.06752	8.51761	8.29257	1.36837	0.45246	0.240176	6.00076	5.60038	5.80057	8.52988	8.61324	8.57156	1.47771	0.563364	0.0209161	5.27791	4.84747	5.06269	0.61051	-0.711914	0.0364526	3.78794	5.33341	4.56068	0.532071	-0.910309	0.00388787
Mycth_2070514		0.557208	0.747648	0.652428	0.913913	0.569952	0.741932	1.13719	0.185468	0.931951	0.447914	0.378216	0.413065	0.488776	0.345557	0.417166	1.00993	0.0142539	0.949912	2.19974	0.906562	1.55315	2.09338	1.06584	0.354302	0.736748	0.261954	0.499351	1.19701	0.259431	1
Mycth_2070572	Fungal specific transcription factor	2.40097	2.88685	2.64391	1.60116	1.20845	1.4048	0.531335	-0.912306	0.173117	3.93883	3.35254	3.64568	2.02014	1.65915	1.83964	0.504608	-0.986765	0.0880071	3.72369	3.90631	3.815	2.71568	1.44132	0.00987661	2.94783	4.19247	3.57015	1.94068	0.95656	0.321458
Mycth_2070581	High mobility group box, HMG1/HMG2	4.41795	3.29219	3.85507	2.28026	2.27319	2.27672	0.590579	-0.759797	0.12311	5.50696	5.49593	5.50144	2.597	3.2579	2.92745	0.532124	-0.910165	0.0294386	2.45761	1.993	2.22531	0.977416	-0.032956	0.698812	5.46974	3.42699	4.44836	1.51954	0.60363	0.546662
Mycth_2070655	HRDC-like	15.9563	8.86799	12.4121	11.5504	8.77263	10.1615	0.818677	-0.288634	0.833769	18.0373	17.1801	17.6087	10.0101	10.353	10.1816	0.578213	-0.790326	0.10208	32.7754	19.7137	26.2445	2.58274	1.3689	0.00367751	35.5032	18.4603	26.9818	2.65006	1.40603	0.0753873
Mycth_2070700	Cytochrome P450	1.29013	1.20173	1.24593	1.1098	1.03971	1.07475	0.862615	-0.213212	0.975641	1.61622	1.19413	1.40517	0.837738	1.22194	1.02984	0.732891	-0.44833	0.841651	1.31187	0.715567	1.01372	0.943209	-0.0843512	0.818735	1.66705	1.44736	1.5572	1.51209	0.596539	0.799602
Mycth_2070790	Fungal transcriptional regulatory protein, N-terminal	1.41138	0.813456	1.11242	0.400656	0.613557	0.507106	0.455859	-1.13334	0.276541	2.62567	1.72441	2.17504	0.7163	0.433264	0.574782	0.264263	-1.91995	0.00245982	2.33321	1.72221	2.02771	3.99859	1.99949	0.00539837	2.55429	0.783782	1.66904	2.90378	1.53793	0.397642
Mycth_2070850		7.68662	6.63024	7.15843	3.74063	4.49281	4.11672	0.575087	-0.798149	0.456193	8.70092	6.70814	7.70453	2.68328	3.06444	2.87386	0.373009	-1.42272	0.0824211	5.59939	2.90316	4.25127	1.03268	0.0464001	0.94097	5.26316	4.64609	4.95462	1.72403	0.785785	0.702974
Mycth_2070868		47.8812	37.8677	42.8745	35.9672	35.5446	35.7559	0.833968	-0.261937	0.720629	59.9796	48.5222	54.2509	40.6724	36.0021	38.3372	0.706665	-0.500902	0.160597	69.1931	57.7617	63.4774	1.7753	0.82806	0.0106637	70.8575	58.7779	64.8177	1.69073	0.757642	0.0666325
Mycth_2070870		0.78203	0.540553	0.661291	1.18399	0.799915	0.991953	1.50002	0.584986	0.474863	0.838183	0.389267	0.613725	0.555323	0.937631	0.746477	1.2163	0.282504	0.586712	3.48748	4.73593	4.11171	4.14507	2.05139	0.00613273	1.00529	0.919118	0.962202	1.28899	0.366243	1
Mycth_2070906	ThiJ/PfpI	2.20425	2.75595	2.4801	1.59909	1.56574	1.58241	0.638044	-0.648273	0.594943	3.67035	2.84274	3.25655	1.79543	1.57203	1.68373	0.517029	-0.951682	0.242915	3.02149	2.24141	2.63145	1.66293	0.733732	0.478609	3.2788	2.26682	2.77281	1.64683	0.719687	0.651837
Mycth_2070971	Protein of unknown function DUF814	44.8666	34.6685	39.7676	29.8649	26.3441	28.1045	0.706718	-0.500793	0.234293	50.9797	46.7004	48.84	25.7624	25.9054	25.8339	0.52895	-0.918797	0.00118555	54.161	32.6486	43.4048	1.54441	0.627055	0.21139	60.1956	51.1165	55.656	2.15438	1.10727	0.00327276
Mycth_2070984		148.096	123.54	135.818	124.694	129.539	127.116	0.935931	-0.0955259	0.986329	116.664	116.012	116.338	118.959	114.773	116.866	1.00454	0.00653438	0.103047	113.86	218.957	166.408	1.3091	0.388576	0.902229	114.346	202.283	158.315	1.35467	0.43794	0.926457
Mycth_2071028		12.9238	7.65465	10.2892	9.53113	9.31259	9.42186	0.915703	-0.127049	0.995264	16.2947	12.8057	14.5502	9.26627	8.08087	8.67357	0.596114	-0.746341	0.047078	13.8508	12.5726	13.2117	1.40224	0.487735	0.440764	19.1139	16.6769	17.8954	2.06321	1.04489	0.0159209
Mycth_2071057	Cellulose-binding, family II, bacterial type	7.61133	4.89161	6.25147	2.62099	2.67483	2.64791	0.423566	-1.23934	0.000102568	7.45884	7.35385	7.40634	3.29526	2.44618	2.87072	0.387603	-1.36735	5.93864e-08	25.2177	24.4222	24.8199	9.3734	3.22857	9.32037e-34	8.05489	7.7265	7.8907	2.74868	1.45874	2.61882e-05
Mycth_2071098		9.76289	8.92601	9.34445	6.58966	6.09063	6.34015	0.678493	-0.559593	0.202807	12.5893	9.82319	11.2063	6.81778	6.51189	6.66483	0.594742	-0.749663	0.0357171	7.42793	5.3848	6.40637	1.01044	0.0149901	0.698812	9.7414	6.01069	7.87605	1.18173	0.240902	0.87477
Mycth_2071169	Histone H4	1039.55	949.557	994.555	1183.87	1201.07	1192.47	1.199	0.261831	0.124277	841.386	723.777	782.582	826.249	878.173	852.211	1.08897	0.122969	0.00957856	782.786	849.158	815.972	0.68427	-0.547363	0.000966095	869.28	992.203	930.741	1.09215	0.12717	0.493221
Mycth_2071198		9.68899	5.58795	7.63847	7.90914	7.17032	7.53973	0.987074	-0.0187705	0.931057	9.78309	7.80099	8.79204	7.65419	6.5791	7.11665	0.809442	-0.305	0.916301	24.1486	9.58898	16.8688	2.23732	1.16177	0.266349	23.1127	9.35135	16.232	2.28086	1.18958	0.350669
Mycth_2071219		3.47728	1.80825	2.64276	3.2211	2.808	3.01455	1.14068	0.189896	0.834738	3.21556	0.894419	2.05499	2.27047	1.43007	1.85027	0.90038	-0.151394	1	4.42532	2.2332	3.32926	1.1044	0.143259	1	1.81488	1.74228	1.77858	0.961255	-0.0570083	0.769705
Mycth_2071270		20.3829	19.9753	20.1791	14.9594	15.2554	15.1074	0.748666	-0.417605	0.433581	23.0188	27.9406	25.4797	11.9987	12.431	12.2148	0.479395	-1.06071	0.0342399	29.3902	25.6604	27.5253	1.82197	0.865502	0.0204549	20.3115	23.9268	22.1192	1.81085	0.856663	0.135297
Mycth_2071285		1327.67	1139.02	1233.35	1201.01	1321.28	1261.14	1.02254	0.0321531	0.692216	1515.93	1042.03	1278.98	1088.75	1173.19	1130.97	0.884276	-0.177432	0.833936	3450.6	3498.97	3474.78	2.75526	1.46219	1.37421e-08	6401.9	6763.16	6582.53	5.82025	2.54108	1.71083e-15
Mycth_2071301	Xylose isomerase-like, TIM barrel	29.7294	22.0972	25.9133	20.5606	19.0812	19.8209	0.764892	-0.386672	0.375662	35.8834	31.2295	33.5564	24.102	21.6229	22.8624	0.681314	-0.553609	0.0851211	45.3002	26.3083	35.8042	1.80639	0.853109	0.0893451	41.7792	29.0192	35.3992	1.54836	0.630738	0.224914
Mycth_2071385		11.9225	12.121	12.0217	10.0613	10.819	10.4401	0.868438	-0.203505	0.920041	15.0551	11.2793	13.1672	11.8244	11.9624	11.8934	0.90326	-0.146787	0.758564	16.849	11.9442	14.3966	1.37896	0.463585	0.458026	14.7213	9.86324	12.2923	1.03354	0.0475883	0.448935
Mycth_2071402		5.19493	5.87081	5.53287	6.85306	7.57989	7.21647	1.30429	0.383265	0.348961	4.42161	3.5469	3.98426	8.2714	9.63659	8.954	2.24734	1.16822	4.99562e-05	4.59932	4.9407	4.77001	0.660989	-0.597303	0.0806046	4.54553	6.62636	5.58595	0.62385	-0.68073	0.0162989
Mycth_2071423	Tetratricopeptide region	99.6194	81.1286	90.374	69.3765	67.2195	68.298	0.755726	-0.404065	0.293417	109.218	102.396	105.807	82.5673	78.4927	80.53	0.761102	-0.393838	0.442385	58.6168	45.0407	51.8287	0.758862	-0.398091	0.0150303	89.8941	73.243	81.5685	1.0129	0.0184864	0.192657
Mycth_2071504		1998.29	1760.72	1879.5	1711.83	1816.93	1764.38	0.938749	-0.0911887	0.974454	2319.71	1834.95	2077.33	1534.03	1628.87	1581.45	0.761292	-0.393479	0.403223	3317.55	3580.59	3449.07	1.95483	0.967044	0.00492611	3491.09	4551.07	4021.08	2.54265	1.34633	0.0428619
Mycth_2071510		54.3302	45.7491	50.0396	43.7053	41.6417	42.6735	0.852794	-0.229731	0.81404	50.7201	46.3935	48.5568	38.9851	42.47	40.7275	0.838761	-0.253668	1	56.1047	54.0116	55.0581	1.29022	0.367616	0.629567	46.0964	32.0228	39.0596	0.959046	-0.0603288	0.171776
Mycth_2071514		2434.74	2386.4	2410.57	2117.45	2212.88	2165.16	0.898194	-0.154901	0.957715	2931.59	2263.33	2597.46	2034.77	2177	2105.89	0.810749	-0.302672	0.800063	3821.58	3547.93	3684.75	1.70184	0.767094	0.0168805	4110.94	5255.79	4683.37	2.22394	1.15312	0.0773387
Mycth_2071531		5.85831	6.15572	6.00701	3.99126	4.87944	4.43535	0.738361	-0.437601	0.715268	6.4872	6.74859	6.6179	3.77547	5.88558	4.83052	0.729919	-0.454193	0.75395	4.79066	2.65515	3.7229	0.839371	-0.252619	0.515993	4.48157	3.18689	3.83423	0.793751	-0.333242	0.285845
Mycth_2071561		1422.84	1138.68	1280.76	1233.18	1312.07	1272.62	0.993646	-0.00919561	0.80489	1676.85	1166.67	1421.76	1042.65	1117.8	1080.22	0.759779	-0.396347	0.583739	2307.95	2360.21	2334.08	1.83407	0.875046	0.00403804	2463.11	3317.93	2890.52	2.67585	1.42	0.0485371
Mycth_2071579		16.107	12.0173	14.0621	11.098	12.2766	11.6873	0.831116	-0.266878	0.778339	21.5361	15.4282	18.4821	11.9047	10.8665	11.3856	0.616034	-0.698919	0.0401646	20.9513	16.3149	18.6331	1.59431	0.67293	0.120887	25.471	25.8457	25.6583	2.25357	1.17221	0.00113984
Mycth_2071628	Hypothetical protein	0.0474483	0	0.0237241	0	0.1456	0.0728001	3.06861	1.61759	0.926001	0.049039	0	0.0245195	0	0	0	0	#NUM!	1	0	0	0	0	#NUM!	0.70861	0	0	0	#DIV/0!	#DIV/0!	NA
Mycth_2071661	Fungal transcriptional regulatory protein, N-terminal	0.993959	0.751705	0.872832	0.476536	0.316304	0.39642	0.454177	-1.13867	0.184933	1.02728	1.18742	1.10735	0.274022	0.271221	0.272621	0.246193	-2.02214	0.00522363	1.37338	0.67381	1.02359	2.58209	1.36854	0.0872711	1.97134	1.09811	1.53472	5.6295	2.49301	0.000922861
Mycth_2071684	RNA-dependent RNA polymerase, eukaryotic-type	0.0422342	0.0154551	0.0288446	0	0.0576001	0.0288	0.998454	-0.0022325	1	0.0873002	0.0344007	0.0608505	0.079387	0.0157151	0.0475511	0.781441	-0.355791	1	0.0416828	0	0.0208414	0.723658	-0.466619	0.97602	0.0558425	0.0297826	0.0428126	0.90035	-0.151443	0.961331
Mycth_2071736		24.2245	20.1873	22.2059	17.8482	17.4013	17.6247	0.793696	-0.333341	0.557627	32.9175	27.8146	30.366	22.85	22.6164	22.7332	0.74864	-0.417656	0.424867	20.974	11.0512	16.0126	0.908531	-0.138392	0.45217	28.8269	20.5574	24.6921	1.08617	0.119249	0.482642
Mycth_2071899	Nucleic acid-binding, OB-fold-like	6.86361	3.8783	5.37095	5.34856	4.64597	4.99726	0.930424	-0.10404	1	7.40668	6.70046	7.05357	4.21194	3.34262	3.77728	0.535513	-0.901007	0.0287543	9.49688	8.08779	8.79233	1.75943	0.815108	0.0720436	7.60711	8.11423	7.86067	2.08104	1.05731	0.0415503
Mycth_2071905	Metallophosphoesterase	28.5711	24.5055	26.5383	24.1255	24.2299	24.1777	0.911049	-0.134399	0.9879	29.0783	25.5327	27.3055	23.9622	24.3662	24.1642	0.884956	-0.176322	0.737628	52.0646	46.7799	49.4222	2.04413	1.03148	0.00065929	41.3318	31.4821	36.4069	1.50665	0.591343	0.320137
Mycth_2071908	Heterokaryon incompatibility	10.8332	8.48784	9.66051	34.4532	33.4727	33.9629	3.51565	1.81379	6.27e-21	9.19869	10.9566	10.0777	13.6626	13.3975	13.5301	1.34258	0.42501	0.000384271	7.675	5.15595	6.41547	0.188896	-2.40433	5.43304e-26	5.66116	5.34912	5.50514	0.406881	-1.29732	6.48418e-11
Mycth_2071953		2714.92	2595.07	2655	2296.85	2563.73	2430.29	0.915365	-0.127581	1	3466.22	2501.83	2984.03	2336.6	2536.1	2436.35	0.816464	-0.292538	0.883322	4551.71	4338.69	4445.2	1.82908	0.871119	0.00402211	4903.89	6149.68	5526.79	2.26847	1.18172	0.0547813
Mycth_2071955	Hypothetical protein	0.30715	0.149864	0.228507	0.155008	0.314174	0.234591	1.02663	0.0379107	1	0.141088	0.0833936	0.112241	0.346407	0.228577	0.287492	2.56139	1.35693	0.355614	0.134729	0.291506	0.213117	0.908463	-0.138501	0.879217	0.203059	0.0360992	0.119579	0.415938	-1.26556	0.429868
Mycth_2071996	Hypothetical protein	5.25063	2.52185	3.88624	6.33471	6.12597	6.23034	1.60318	0.680936	0.147518	4.07	3.20757	3.63878	4.16371	4.48747	4.32559	1.18875	0.249441	0.370872	6.31566	10.2111	8.26338	1.32631	0.407422	0.850359	2.92884	4.07868	3.50376	0.810008	-0.303993	0.323244
Mycth_2072063	Major facilitator superfamily	3.81509	3.34256	3.57883	2.91579	2.88923	2.90251	0.811023	-0.302185	0.825449	3.18473	3.58556	3.38514	2.73056	2.5798	2.65518	0.784364	-0.350405	0.909659	5.39449	3.71527	4.55488	1.56929	0.650113	0.317446	4.91097	3.25943	4.0852	1.53858	0.621596	0.592139
Mycth_2072093	Peptidase A1	0.366836	0.322174	0.344505	0.208271	0.262658	0.235464	0.683485	-0.549018	0.913908	0.492875	0.403375	0.448125	0.455094	0.327594	0.391344	0.873292	-0.195464	1	0.651684	0.537148	0.594416	2.52444	1.33597	0.391624	0.472909	0.42683	0.449869	1.14955	0.201069	0.991774
Mycth_2072228		0	0	0	0	0	0	#DIV/0!	#DIV/0!	NA	0	0	0	0	0	0	#DIV/0!	#DIV/0!	NA	0	0	0	#DIV/0!	#DIV/0!	NA	0	0	0	#DIV/0!	#DIV/0!	NA
Mycth_2072383	Glycoside Hydrolase Family 43 protein	4.5038	5.15777	4.83078	6.62252	6.46278	6.54265	1.35437	0.437617	0.126609	3.68365	4.51299	4.09832	5.37178	5.24453	5.30816	1.2952	0.373178	0.0311516	6.13986	7.31438	6.72712	1.02819	0.0401138	0.680216	5.07673	7.71147	6.3941	1.20458	0.26853	0.951559
Mycth_2072388	Beta-lactamase	53.1799	51.9445	52.5622	62.0502	56.9368	59.4935	1.13187	0.178706	0.326292	53.6582	52.686	53.1721	61.4006	58.8638	60.1322	1.1309	0.177468	0.00618057	41.7956	34.2842	38.0399	0.639396	-0.645218	0.000621789	45.6294	40.5307	43.0801	0.716423	-0.481117	0.000260532
Mycth_2072459	Zinc finger, CCHC-type	0	0	0	0	0	0	#DIV/0!	#DIV/0!	NA	0	0	0	0	0	0	#DIV/0!	#DIV/0!	NA	0	0	0	#DIV/0!	#DIV/0!	NA	0	0	0	#DIV/0!	#DIV/0!	NA
Mycth_2072527		0	0	0	0	0	0	#DIV/0!	#DIV/0!	NA	0	0	0	0	0	0	#DIV/0!	#DIV/0!	NA	0	0	0	#DIV/0!	#DIV/0!	NA	0	0	0	#DIV/0!	#DIV/0!	NA
Mycth_2072543	Glycosyltransferase Family 90 protein	38.2495	26.1656	32.2075	45.0921	45.6544	45.3733	1.40878	0.494445	0.00612003	42.5727	33.823	38.1978	38.9434	34.4552	36.6993	0.960769	-0.0577388	0.270121	71.2814	66.4533	68.8673	1.5178	0.601977	0.119622	46.6653	41.3203	43.9928	1.19874	0.261515	0.850521
Mycth_2072733	DNA/RNA helicase, ATP-dependent, DEAH-box type, conserved site	15.4207	9.10408	12.2624	11.2454	11.8826	11.564	0.943047	-0.0845986	0.99545	16.4689	15.1145	15.7917	9.12095	8.75993	8.94044	0.566148	-0.82075	0.00964488	20.7998	14.468	17.6339	1.5249	0.608711	0.170637	32.4192	18.8489	25.634	2.8672	1.51964	0.00976023
Mycth_2072958		34.8634	28.524	31.6937	36.4919	34.92	35.706	1.1266	0.17197	0.343124	38.5635	39.8894	39.2265	42.8261	41.1759	42.001	1.07073	0.0985967	0.0219651	74.4285	92.359	83.3938	2.33557	1.22378	0.0262837	49.5674	58.8191	54.1932	1.29028	0.367689	0.943298
Mycth_2073127	Preprotein translocase Sec, Sec61-beta subunit	90.5487	84.9715	87.7601	85.5219	80.4394	82.9806	0.94554	-0.0807901	0.964371	99.6866	95.9611	97.8239	93.7843	104.512	99.148	1.01354	0.0193979	0.0868496	102.98	90.4505	96.7151	1.16551	0.220966	0.960185	108.736	101.867	105.302	1.06207	0.0868734	0.345191
Mycth_2073132	Leucine-rich repeat, typical subtype	93.1008	93.0604	93.0806	72.5013	78.4567	75.479	0.8109	-0.302405	0.612498	100.07	100.934	100.502	85.1732	86.974	86.0736	0.856438	-0.22358	0.860298	89.3484	66.6628	78.0056	1.03347	0.047501	0.637833	101.554	92.0722	96.813	1.12477	0.16963	0.562062
Mycth_2073197	Ras GTPase	58.8084	52.2303	55.5193	42.7361	42.5955	42.6658	0.768486	-0.379909	0.379005	65.4414	58.4493	61.9454	49.7806	50.9581	50.3694	0.813126	-0.29845	0.865346	64.1774	44.3221	54.2498	1.2715	0.346536	0.594958	72.6042	54.8873	63.7457	1.26557	0.339782	0.980959
Mycth_2073265	Cyclin-like	118.319	139.87	129.094	107.789	108.847	108.318	0.839062	-0.25315	0.860915	129.767	136.846	133.307	131.307	128.997	130.152	0.976335	-0.034552	0.152724	83.5488	145.258	114.403	1.05618	0.0788533	0.844727	87.3436	158.334	122.839	0.94381	-0.0834312	0.530987
Mycth_2073485	Cation efflux protein	45.0766	34.5736	39.8251	32.6806	35.4461	34.0633	0.855324	-0.225457	0.80836	46.9816	44.2837	45.6326	33.1925	32.1025	32.6475	0.715442	-0.483092	0.204806	35.1745	27.5429	31.3587	0.9206	-0.119354	0.254243	41.7442	36.1813	38.9627	1.19344	0.255121	0.838103
Mycth_2073591	Serine/threonine-specific protein phosphatase and bis(5-nucleosyl)-tetraphosphatase	55.8065	43.5548	49.6806	38.6368	38.2077	38.4222	0.773385	-0.370742	0.407304	54.9901	48.9514	51.9708	36.1995	36.3288	36.2642	0.69778	-0.519155	0.130371	41.0877	25.3827	33.2352	0.864999	-0.20923	0.152399	66.265	47.4076	56.8363	1.56729	0.648268	0.187974
Mycth_2073656	Ubiquitin-conjugating enzyme, E2	101.409	120.714	111.061	107.293	109.844	108.569	0.977557	-0.0327469	0.911434	114.513	125.771	120.142	134.212	138.467	136.339	1.13482	0.182459	0.0102135	41.4581	41.006	41.2321	0.379778	-1.39677	4.07795e-12	104.287	117.094	110.691	0.811878	-0.300665	0.00348913
Mycth_2074077		71.3328	46.4695	58.9011	28.7393	29.5831	29.1612	0.495087	-1.01425	0.000650908	77.2026	55.6284	66.4155	28.9151	27.0923	28.0037	0.421644	-1.2459	1.31621e-06	54.6037	43.6046	49.1041	1.68389	0.751796	0.0277227	46.4802	36.4388	41.4595	1.4805	0.566085	0.363699
Mycth_2074154		36.6722	20.9228	28.7975	38.5361	36.4604	37.4982	1.30214	0.38088	0.132124	37.0501	30.9014	33.9757	38.2079	33.7916	35.9998	1.05957	0.0834829	0.0282168	18.574	12.9247	15.7494	0.420003	-1.25153	2.89717e-10	32.1861	28.7235	30.4548	0.845973	-0.241316	0.00908052
Mycth_2074176	Calcium-binding EF-hand	199.81	213.54	206.675	202.78	209.584	206.182	0.997614	-0.00344693	0.789492	205.302	188.788	197.045	254.417	263.594	259.006	1.31445	0.394455	1.2828e-06	150.237	212.263	181.25	0.879076	-0.185939	0.337588	220.229	283.26	251.744	0.971965	-0.0410239	0.289567
Mycth_2074210	Sulphate-modifying factor-like	165.506	166.956	166.231	175.787	175.766	175.776	1.05742	0.0805526	0.542874	166.831	189.91	178.371	228.004	232.429	230.217	1.29067	0.368115	0.000305611	101.368	74.2928	87.8302	0.49967	-1.00095	8.4148e-08	134.118	158.346	146.232	0.635192	-0.654734	5.42382e-07
Mycth_2074326	Zinc finger, RING-type	39.3337	36.6701	38.0019	36.3837	38.8414	37.6125	0.989753	-0.014859	0.821238	47.6578	35.6979	41.6778	46.5907	45.9137	46.2522	1.10975	0.150241	0.011712	37.1984	35.3078	36.2531	0.963858	-0.0531073	0.363785	46.3637	34.1918	40.2778	0.870829	-0.199538	0.0214118
Mycth_2074408	WW/Rsp5/WWP	58.4152	57.0464	57.7308	82.2882	78.6792	80.4837	1.39412	0.479356	0.0089092	57.2723	61.7163	59.4943	81.8441	90.2191	86.0316	1.44605	0.532117	5.24293e-06	45.3126	37.5928	41.4527	0.515045	-0.957231	1.34105e-06	97.6543	98.7155	98.1849	1.14126	0.190634	0.636536
Mycth_2074571	WD40 repeat	61.288	49.7579	55.5229	46.3949	46.361	46.378	0.835294	-0.259645	0.716189	60.6907	61.1647	60.9277	44.8843	40.7624	42.8234	0.702856	-0.5087	0.145175	38.9616	32.9068	35.9342	0.774811	-0.368084	0.0237528	45.9496	43.2712	44.6104	1.04173	0.0589813	0.291126
Mycth_2074663	Regulator of G protein signalling	93.5409	100.045	96.793	78.8223	77.7131	78.2677	0.80861	-0.306484	0.654342	95.2647	99.1094	97.187	97.4267	97.651	97.5389	1.00362	0.00521349	0.0821124	49.4088	49.537	49.4729	0.632099	-0.661779	0.000187983	52.9463	57.7374	55.3418	0.567382	-0.817607	1.20525e-08
Mycth_2074790	Hypoxia induced protein conserved region	789.848	1643.54	1216.69	508.845	516.987	512.916	0.421565	-1.24617	0.49923	696.349	1024.86	860.606	867.147	980.914	924.03	1.0737	0.102588	0.430329	600.191	854.356	727.274	1.41792	0.503775	0.666605	394.291	621.273	507.782	0.549529	-0.863732	0.00064962
Mycth_2074876	Ubiquitin-conjugating enzyme, E2	23.3305	21.7499	22.5402	20.4681	18.4379	19.453	0.863035	-0.212508	0.870716	24.7281	22.0896	23.4089	18.4981	18.7924	18.6452	0.796503	-0.328249	0.826049	17.5232	17.2397	17.3814	0.893509	-0.162446	0.266828	24.6389	25.7662	25.2026	1.35169	0.434764	0.78967
Mycth_2074905	Glucose-6-phosphate dehydrogenase	111.913	91.7243	101.819	52.1561	54.6702	53.4132	0.524591	-0.930734	4.98e-05	101.258	81.281	91.2697	61.605	60.2019	60.9034	0.667291	-0.583612	0.0296148	72.1636	62.2471	67.2053	1.25822	0.331381	0.675711	68.5945	63.5524	66.0735	1.08489	0.117547	0.413846
Mycth_2075102	Protein synthesis factor, GTP-binding	90.966	79.5369	85.2514	66.3434	64.0788	65.2111	0.764927	-0.386606	0.347737	90.3731	80.2095	85.2913	74.0122	72.8122	73.4122	0.860724	-0.216378	0.85705	103.57	84.6502	94.1099	1.44316	0.529229	0.20075	122.869	103.441	113.155	1.54136	0.624206	0.20776
Mycth_2075489	Ribosomal protein L5	323.943	338.067	331.005	331.396	327.175	329.286	0.994805	-0.0075139	0.793608	298.955	292.718	295.836	296.374	298.278	297.326	1.00503	0.00724363	0.0762244	499.129	501.331	500.23	1.51914	0.603252	0.113461	485.22	446.577	465.898	1.56696	0.647971	0.159002
Mycth_2075498	Thioredoxin domain	110.449	100.529	105.489	95.8166	94.3647	95.0906	0.901427	-0.149718	0.961333	139.929	117.476	128.702	101.011	98.4095	99.7104	0.774736	-0.368223	0.543036	169.535	147.172	158.354	1.66529	0.735775	0.0275663	168.513	167.384	167.949	1.68437	0.752205	0.0584805
Mycth_2075565	Ribosome recycling factor	69.6056	63.3795	66.4926	52.4349	49.3532	50.8941	0.76541	-0.385695	0.376656	80.4632	73.6034	77.0333	55.2705	56.9292	56.0998	0.728255	-0.457485	0.271252	112.384	90.1854	101.285	1.99011	0.992849	0.000763193	136.074	101.611	118.843	2.11841	1.08298	0.000376836
Mycth_2075738	Aminotransferase, class V/Cysteine desulphurase	6.74832	5.03213	5.89022	6.79522	7.60594	7.20058	1.22246	0.289791	0.267351	5.57965	6.65822	6.11894	7.78316	7.19191	7.48754	1.22367	0.29121	0.0179656	6.83615	5.09606	5.9661	0.828559	-0.271324	0.168546	5.37888	6.73411	6.05649	0.808877	-0.306008	0.0391529
Mycth_2075799	Aspartyl-tRNA synthetase, class IIb	27.4688	32.7448	30.1068	35.0164	34.7665	34.8914	1.15892	0.212785	0.403209	38.365	36.6604	37.5127	38.8474	41.7467	40.2971	1.07423	0.103297	0.0211234	69.9661	60.6277	65.2969	1.87143	0.904142	0.00301089	41.8028	37.3362	39.5695	0.981946	-0.0262851	0.140133
Mycth_2075999	DAHP synthetase I/KDSA	44.8905	41.0193	42.9549	44.8743	42.7972	43.8358	1.02051	0.029285	0.734196	42.0095	32.6082	37.3088	39.7471	44.152	41.9495	1.12439	0.169138	0.011205	84.2896	86.4128	85.3512	1.94707	0.961303	0.00162479	68.122	67.3329	67.7274	1.6145	0.691086	0.132556
Mycth_2076088	6,7-dimethyl-8-ribityllumazine synthase	198.15	248.482	223.316	223.18	229.588	226.384	1.01374	0.0196823	0.84911	170.969	197.445	184.207	228.057	229.398	228.728	1.24169	0.312304	0.00225936	126.743	168.22	147.481	0.651466	-0.618237	0.00225818	138.001	186.629	162.315	0.709642	-0.494837	0.0032852
Mycth_2076157	SFT2-like	38.9553	40.3778	39.6666	30.537	32.1602	31.3486	0.790301	-0.339525	0.587309	46.8694	41.0719	43.9706	37.5412	35.2443	36.3927	0.82766	-0.27289	0.975317	37.6661	28.6333	33.1497	1.05745	0.0805958	0.768557	39.6762	38.6957	39.186	1.07675	0.106687	0.474496
Mycth_2076293		15.433	15.5612	15.4971	22.1889	23.1868	22.6878	1.464	0.54992	0.00313483	9.52436	9.8801	9.70223	15.6525	16.4633	16.0579	1.65507	0.726895	2.37562e-09	5.60681	4.04184	4.82433	0.212639	-2.23352	2.23711e-22	7.6705	5.7547	6.7126	0.418025	-1.25834	8.33485e-12
Mycth_2076503	AAA ATPase, conserved site	65.0084	55.6869	60.3476	54.7136	56.9669	55.8403	0.92531	-0.111992	1	70.5721	57.3883	63.9802	55.0118	55.9304	55.4711	0.867004	-0.205889	0.838343	83.2989	68.8196	76.0593	1.36209	0.445818	0.37618	77.0347	64.2552	70.6449	1.27354	0.348849	0.960997
Mycth_2076551		10.4073	8.03339	9.22033	7.89367	9.73045	8.81206	0.955721	-0.0653383	0.95494	6.05035	5.06631	5.55833	4.67664	4.53807	4.60735	0.828909	-0.270714	1	32.4191	31.5001	31.9596	3.6268	1.8587	3.22592e-10	22.0922	15.9107	19.0015	4.12416	2.0441	1.53886e-09
Mycth_2076744		51.4396	62.8455	57.1425	93.4597	96.9457	95.2027	1.66606	0.736437	0.000317864	35.5115	40.0053	37.7584	78.4024	79.8505	79.1265	2.0956	1.06736	2.45004e-23	20.4214	43.363	31.8922	0.334993	-1.5778	2.79669e-08	27.939	59.8776	43.9083	0.554913	-0.849666	0.0123454
Mycth_2076770	Thioredoxin-like fold	98.0253	99.5054	98.7653	97.7409	93.7122	95.7266	0.969233	-0.0450853	0.895605	117.477	101.917	109.697	100.571	107.908	104.239	0.95025	-0.073621	0.304171	174.196	156.789	165.492	1.7288	0.789774	0.0154999	138.622	136.891	137.757	1.32154	0.402219	0.819253
Mycth_2076935		17.3845	11.7171	14.5508	13.5164	12.929	13.2227	0.908726	-0.138083	0.968619	16.4356	13.3933	14.9144	15.2016	14.6508	14.9262	1.00079	0.00113895	0.140755	7.04702	6.92696	6.98699	0.528409	-0.920273	2.89867e-06	12.4605	12.0686	12.2645	0.82168	-0.283352	0.00677292
Mycth_2076976	Sugar transporter, conserved site	23.9208	20.4692	22.195	151.689	148.406	150.048	6.76042	2.75711	4.76e-49	16.5877	20.3935	18.4906	103.034	102.198	102.616	5.54963	2.47239	1.01745e-82	10.7161	6.26693	8.49153	0.0565922	-4.14325	3.77385e-69	16.2202	20.0473	18.1337	0.176715	-2.50051	4.13453e-43
Mycth_2077028	Maf1 regulator	26.625	22.5278	24.5764	25.2739	25.865	25.5695	1.04041	0.057148	0.665669	27.8574	23.1497	25.5036	26.8505	27.7816	27.316	1.07107	0.0990497	0.040406	22.1759	21.4299	21.8029	0.852694	-0.229901	0.105999	32.6661	26.2011	29.4336	1.07752	0.107717	0.427864
Mycth_2077114		92.6267	78.8574	85.7421	85.1501	82.5553	83.8527	0.977965	-0.0321458	0.872137	92.8685	97.8817	95.3751	81.1465	76.5255	78.836	0.826589	-0.274758	0.989893	67.4825	62.0933	64.7879	0.772639	-0.372133	0.0189215	52.1167	46.0107	49.0637	0.622351	-0.684199	1.07649e-06
Mycth_2077534		28.3988	19.8897	24.1442	13.3135	12.4751	12.8943	0.534053	-0.904946	0.000670001	38.0892	32.8256	35.4574	11.8612	10.9507	11.4059	0.32168	-1.6363	2.01396e-17	12.1242	13.7318	12.928	1.00261	0.00376437	0.544228	23.7215	27.7023	25.7119	2.25425	1.17265	0.015618
Mycth_2077546		12.4424	8.04388	10.2431	12.0247	11.1714	11.5981	1.13228	0.179229	0.454653	11.4878	10.9792	11.2335	10.1035	10.6793	10.3914	0.925036	-0.112419	0.572159	18.2562	15.4187	16.8374	1.45174	0.537787	0.263952	13.737	8.33539	11.0362	1.06205	0.0868525	0.487027
Mycth_2077636	Tyrosine protein kinase, active site	6.67793	6.66466	6.67129	7.37596	6.89275	7.13436	1.06941	0.0968162	0.766863	8.15668	4.8954	6.52604	6.84677	8.33543	7.5911	1.1632	0.218101	0.246336	11.1443	8.22267	9.68351	1.35731	0.440747	0.583705	11.4384	10.4671	10.9528	1.44284	0.528912	0.676863
Mycth_2077803	Ras GTPase	112.441	90.1339	101.288	85.4311	88.3142	86.8726	0.857683	-0.221483	0.810802	104.031	100.729	102.38	108.963	111.491	110.227	1.07665	0.106549	0.0182674	88.9131	73.4448	81.179	0.934459	-0.0977961	0.286419	90.8348	92.6665	91.7507	0.832377	-0.26469	0.00703766
Mycth_2077843	Conserved hypothetical protein CHP00730	23.3506	27.0757	25.2131	38.4844	42.7237	40.6041	1.61043	0.687448	0.000724142	23.1467	19.295	21.2208	39.4801	41.874	40.6771	1.91685	0.938735	1.1395e-13	20.1797	37.7642	28.9719	0.713523	-0.486967	0.193681	37.7514	41.3621	39.5568	0.972459	-0.0402913	0.146935
Mycth_2077959	Ras GTPase	45.3704	41.0092	43.1898	38.0323	37.8804	37.9564	0.878827	-0.186349	0.903553	50.4288	47.4986	48.9637	37.6099	38.7275	38.1687	0.779531	-0.359321	0.635958	24.5688	19.632	22.1004	0.582258	-0.78027	6.74627e-05	40.5247	38.4612	39.4929	1.03469	0.0492031	0.28375
Mycth_2078031	Ribosomal protein L1	50.7975	45.1956	47.9966	45.9694	45.3057	45.6376	0.95085	-0.0727099	0.94897	63.182	56.1815	59.6818	51.8362	52.0706	51.9534	0.870507	-0.200072	0.788608	69.1406	61.4624	65.3015	1.43087	0.516895	0.235134	92.1115	82.2502	87.1809	1.67806	0.746794	0.062151
Mycth_2078041	Protein of unknown function DUF1665	19.9337	11.4605	15.6971	14.9271	14.9406	14.9339	0.951378	-0.0719089	0.984826	21.268	16.6388	18.9534	15.0199	16.2571	15.6385	0.825103	-0.277355	0.954457	35.1493	25.9487	30.549	2.04562	1.03254	0.00175041	39.7478	23.1755	31.4617	2.01181	1.00849	0.116657
Mycth_2078128	Formyl transferase, N-terminal	17.4849	16.8842	17.1846	14.1954	14.0617	14.1286	0.822167	-0.282497	0.743136	25.5304	17.4787	21.5046	19.3321	16.353	17.8425	0.82971	-0.269321	0.964638	40.746	25.2672	33.0066	2.33616	1.22414	0.00191111	42.0483	33.7181	37.8832	2.1232	1.08624	0.00202726
Mycth_2078150	Signal recognition particle, SRP54 subunit, GTPase	68.0318	84.7047	76.3683	229.263	235.179	232.221	3.04081	1.60445	6.83e-20	52.3926	53.2394	52.816	196.475	211.529	204.002	3.86251	1.94954	3.82616e-59	112.492	126.275	119.383	0.514094	-0.959897	1.64995e-07	39.7275	56.4691	48.0983	0.235773	-2.08453	1.50623e-33
Mycth_2078193		176.34	149.775	163.057	165.382	158.202	161.792	0.992241	-0.0112373	0.816495	178.455	178.644	178.549	141.889	131.268	136.578	0.764933	-0.386594	0.486825	87.4145	74.2518	80.8331	0.49961	-1.00112	1.05579e-07	83.659	83.2659	83.4625	0.611096	-0.71053	2.78224e-07
Mycth_2078222	Protein kinase-like	13.0551	14.533	13.794	7.68907	7.92481	7.80694	0.565966	-0.821212	0.0530576	14.3754	10.8076	12.5915	8.60026	8.10375	8.352	0.663305	-0.592256	0.28056	25.4682	28.5849	27.0266	3.46186	1.79155	1.07307e-05	8.52995	8.45331	8.49163	1.01672	0.0239182	0.503326
Mycth_2078660		139.545	129.245	134.395	131.546	135.363	133.454	0.992999	-0.0101365	0.810265	154.526	187.728	171.127	171.097	162.56	166.829	0.974883	-0.0366985	0.448925	152.078	148.247	150.162	1.12519	0.170174	0.924132	224.233	225.455	224.844	1.34775	0.430557	0.728283
Mycth_2078767	Heat shock protein DnaJ	39.4082	32.5961	36.0021	24.3061	23.106	23.7061	0.658463	-0.602826	0.0702086	39.8118	35.132	37.4719	27.8685	27.033	27.4508	0.73257	-0.448962	0.377281	23.7061	31.8975	27.8018	1.17277	0.229923	1	48.079	38.2936	43.1863	1.57323	0.653725	0.230718
Mycth_2079066		153.273	153.239	153.256	141.903	146.214	144.059	0.939985	-0.0892899	0.966376	162.739	169.962	166.35	166.53	166.815	166.673	1.00194	0.0027922	0.0768826	99.7349	108.595	104.165	0.723074	-0.467785	0.00352214	129.148	148.047	138.598	0.831557	-0.266114	0.00450013
Mycth_2079097	cell wall glucanase	543.087	589.703	566.395	424.498	427.412	425.955	0.752045	-0.411109	0.448896	462.685	529.765	496.225	522.259	524.105	523.182	1.05432	0.0763172	0.118115	228.959	248.188	238.573	0.560091	-0.836268	2.25394e-06	253.333	304.704	279.019	0.533311	-0.906951	1.24682e-10
Mycth_2079474		313.808	407.67	360.739	410.28	412.497	411.389	1.14041	0.189547	0.58181	196.878	209.893	203.385	351	357.938	354.469	1.74284	0.801442	4.60756e-17	374.427	600.028	487.228	1.18435	0.244093	1	171.993	169.321	170.657	0.481445	-1.05456	6.35298e-13
Mycth_2079758		57.9747	48.3614	53.168	37.4636	38.282	37.8728	0.712323	-0.489396	0.149504	66.91	57.4051	62.1576	36.8195	38.5565	37.688	0.60633	-0.721826	0.00206423	56.0101	41.8932	48.9516	1.29253	0.370194	0.550441	48.9739	45.6936	47.3338	1.25594	0.328765	1
Mycth_2079764	3-oxo-5-alpha-steroid 4-dehydrogenase, C-terminal	19.0686	21.2033	20.136	18.911	14.3146	16.6128	0.82503	-0.277481	0.824237	24.5714	22.3478	23.4596	20.5828	16.9009	18.7418	0.798897	-0.323918	0.822891	14.8215	17.1764	15.999	0.963051	-0.0543163	0.553645	19.1124	23.3299	21.2212	1.13229	0.179241	0.746729
Mycth_2079768	ATPase, F1 complex, delta/epsilon subunit	157.149	198.305	177.727	179.169	188.043	183.606	1.03308	0.0469534	0.810266	187.045	183.863	185.454	188.937	237.583	213.26	1.14994	0.201555	0.100036	187.844	177.063	182.454	0.993724	-0.00908304	0.444352	191.706	196.446	194.076	0.910043	-0.135993	0.12144
Mycth_2079774	ARF/SAR superfamily	275.635	267.099	271.367	259.84	274.785	267.312	0.985059	-0.0217181	0.823867	281.212	263.432	272.322	311.081	296.778	303.929	1.11607	0.158422	0.00325257	212.655	213.587	213.121	0.797274	-0.326853	0.0257789	256.757	263.081	259.919	0.855196	-0.225673	0.0089835
Mycth_2079848	Sin3 associated polypeptide p18	28.9317	20.356	24.6438	21.3004	21.5861	21.4433	0.870129	-0.200699	0.872865	36.4636	21.5528	29.0082	17.5353	16.752	17.1436	0.590994	-0.758785	0.232682	34.8557	25.2229	30.0393	1.40087	0.486326	0.320468	49.5821	31.099	40.3405	2.35309	1.23456	0.00869839
Mycth_2079850		349.571	412.78	381.176	348.336	343.263	345.799	0.907192	-0.14052	0.999258	400.592	381.057	390.824	376.365	379.75	378.057	0.967334	-0.0479146	0.21223	354.095	352.481	353.288	1.02166	0.0309092	0.557702	399.245	407.823	403.534	1.06739	0.0940852	0.357396
Mycth_2079857	Gtr1/RagA G protein	61.6044	56.2325	58.9185	42.7048	42.4301	42.5674	0.72248	-0.46897	0.182608	74.793	79.0119	76.9024	58.1977	55.985	57.0914	0.742387	-0.429756	0.422552	78.9722	82.7959	80.8841	1.90014	0.926105	0.00254453	40.782	50.0347	45.4084	0.795363	-0.330315	0.00578947
Mycth_2079864	Mitochondrial import inner membrane translocase, subunit Tim17/22	53.6341	47.9693	50.8017	51.2934	47.3048	49.2991	0.970422	-0.0433159	0.906999	63.252	53.8785	58.5653	55.743	57.9718	56.8574	0.970838	-0.0426975	0.24733	108.652	100.627	104.639	2.12254	1.08579	0.000184851	114.409	95.5644	104.987	1.84649	0.884789	0.0127581
Mycth_2079868	Lipase, active site	47.599	39.4543	43.5267	30.688	30.6177	30.6528	0.704231	-0.505879	0.142763	42.2614	39.9285	41.0949	32.8942	31.6308	32.2625	0.785073	-0.349102	0.693947	28.628	26.8579	27.7429	0.90507	-0.143899	0.21888	23.0308	24.8027	23.9167	0.741317	-0.431838	0.00106652
Mycth_2079898	WD40 repeat	22.4999	15.0949	18.7974	18.076	16.3583	17.2172	0.915934	-0.126684	0.987395	23.0263	16.6198	19.823	16.1293	14.7743	15.4518	0.779487	-0.359404	0.673385	25.1452	20.0529	22.5991	1.31259	0.392414	0.546513	23.6247	17.1887	20.4067	1.32067	0.401268	0.848636
Mycth_2080003	RNA recognition motif, RNP-1	80.6549	55.69	68.1724	71.5831	70.8176	71.2004	1.04442	0.0626958	0.635787	90.7949	71.7485	81.2717	69.1265	63.7636	66.4451	0.817567	-0.290591	0.866485	183.509	170.097	176.803	2.48317	1.31218	6.05877e-07	130.45	95.6605	113.055	1.70148	0.766791	0.0440934
Mycth_2080045	Mitochondrial import translocase, subunit Tom22	53.6212	44.5283	49.0748	45.9839	46.6089	46.2964	0.943385	-0.0840819	0.971953	66.4629	47.1259	56.7944	50.486	53.5161	52.0011	0.915602	-0.127207	0.61372	145.177	115.55	130.364	2.81585	1.49357	8.64749e-09	166.141	94.3616	130.251	2.50478	1.32468	0.0375898
Mycth_2080075	Aminotransferase, class I and II	82.6589	85.7578	84.2084	57.3264	62.4072	59.8668	0.710937	-0.492207	0.202807	92.5089	88.9235	90.7162	68.1391	74.1022	71.1207	0.783991	-0.351092	0.637781	96.22	109.88	103.05	1.72132	0.783517	0.0917286	74.0692	75.8994	74.9843	1.05432	0.0763191	0.302186
Mycth_2080102	HEAT	46.0308	33.6042	39.8175	28.1257	28.7272	28.4265	0.713919	-0.486168	0.152286	53.5705	40.1779	46.8742	30.5441	30.7913	30.6677	0.654254	-0.612077	0.0222344	47.3512	27.5901	37.4707	1.31816	0.398527	0.584039	49.8139	38.6175	44.2157	1.44177	0.52784	0.441787
Mycth_2080506	Cysteine synthase/cystathionine beta-synthase P-phosphate-binding site	128.145	143.195	135.67	140.506	141.433	140.969	1.03906	0.0552835	0.690572	125.566	136.807	131.187	118.783	124.35	121.567	0.926668	-0.109875	0.493346	374.368	345.74	360.054	2.55413	1.35283	1.64733e-07	197.35	197.309	197.329	1.62322	0.698859	0.0941389
Mycth_2080603	Biotin/lipoyl attachment	272.648	262.601	267.624	170.062	173.946	172.004	0.642707	-0.637766	0.0175481	336.826	328.189	332.508	167.801	164.665	166.233	0.499938	-1.00018	1.58374e-08	731.012	744.574	737.793	4.28939	2.10077	3.16012e-15	438.726	314.785	376.755	2.26643	1.18042	1.60351e-05
Mycth_2080800	Proteasome/cyclosome, regulatory subunit	8.96992	5.90463	7.43727	5.98108	5.84265	5.91186	0.794897	-0.331161	0.542111	10.4549	8.05494	9.25491	6.05633	5.95623	6.00628	0.648983	-0.623747	0.038177	6.77674	4.10059	5.43867	0.919958	-0.12036	0.330109	10.0738	7.77861	8.92618	1.48614	0.571572	0.375721
Mycth_2080826	SET	80.1804	63.9707	72.0755	36.3301	32.6871	34.5086	0.478784	-1.06255	4.14e-06	89.538	87.1047	88.3213	37.5224	38.174	37.8482	0.428528	-1.22254	3.64957e-11	95.9519	81.9485	88.9502	2.57763	1.36604	5.10614e-07	130.476	104.35	117.413	3.1022	1.63329	1.96824e-10
Mycth_2080893	Sugar transporter, conserved site	23.2134	16.2147	19.7141	22.644	24.3103	23.4771	1.19088	0.252028	0.202924	17.0055	13.8723	15.4389	19.615	18.9848	19.2999	1.25008	0.32202	0.00101059	17.07	10.5965	13.8332	0.589222	-0.763117	0.000182698	19.3223	14.9362	17.1293	0.887533	-0.172127	0.0496227
Mycth_2081074	RNA recognition motif, RNP-1	53.5155	40.6828	47.0992	42.9336	42.8251	42.8793	0.910406	-0.135418	0.97813	56.8452	49.722	53.2836	43.1264	40.421	41.7737	0.783987	-0.351098	0.612582	68.3357	60.8617	64.5987	1.50652	0.591222	0.120918	62.117	51.1467	56.6319	1.35568	0.439021	0.689369
Mycth_2081200	Cytochrome b5	272.305	295.116	283.711	248.113	249.033	248.573	0.876149	-0.190752	0.914876	281.48	262.549	272.014	194.859	201.629	198.244	0.728799	-0.456407	0.227904	347.612	321.351	334.482	1.34561	0.428259	0.414804	421.821	376.242	399.032	2.01283	1.00923	0.000873416
Mycth_2081249	Helicase, superfamily 1 and 2, ATP-binding	38.322	35.4901	36.9061	39.5927	38.9741	39.2834	1.06442	0.0900616	0.546901	42.421	39.4755	40.9483	40.0461	37.2907	38.6684	0.944323	-0.0826479	0.317073	55.443	55.9936	55.7183	1.41837	0.504231	0.273094	61.7969	51.9988	56.8978	1.47143	0.55722	0.356403
Mycth_2081294	GCN5-related N-acetyltransferase	30.0199	24.6956	27.3577	14.5791	14.667	14.623	0.534511	-0.903708	0.00049537	35.078	29.6702	32.3741	16.9136	15.0666	15.9901	0.493916	-1.01766	2.63419e-06	26.3043	21.9594	24.1318	1.65026	0.722696	0.0536211	32.0655	28.2197	30.1426	1.88508	0.914625	0.0149848
Mycth_2081549	Conserved hypothetical protein CHP02453	41.4328	32.1074	36.7701	29.7117	28.9807	29.3462	0.7981	-0.325359	0.555205	47.7198	37.6356	42.6777	31.305	31.2116	31.2583	0.732427	-0.449242	0.306677	29.7334	22.2634	25.9984	0.885922	-0.174748	0.202277	53.9101	48.4452	51.1776	1.63725	0.711275	0.119595
Mycth_2081554	Mitochondrial substrate carrier	53.8225	51.1659	52.4942	69.4037	64.3648	66.8843	1.27413	0.34951	0.0602167	55.9738	51.2545	53.6141	70.6372	70.477	70.5571	1.31602	0.396178	1.41694e-05	53.9478	47.1964	50.5721	0.756114	-0.403324	0.0169423	80.3307	78.453	79.3919	1.12521	0.170199	0.577365
Mycth_2081599	Yip1 domain	51.0574	43.1743	47.1158	57.0047	53.6942	55.3494	1.17475	0.232356	0.211721	47.3614	38.5234	42.9424	49.098	50.0085	49.5533	1.15395	0.206577	0.00412659	55.8247	46.6115	51.2181	0.925359	-0.111915	0.268571	57.3801	43.191	50.2855	1.01478	0.0211639	0.230238
Mycth_2081821	GOLD	56.6692	46.2395	51.4543	39.0985	43.4438	41.2712	0.802093	-0.318159	0.582117	62.7439	48.7299	55.7369	41.5319	45.3537	43.4428	0.779427	-0.359515	0.605925	87.4743	62.6891	75.0817	1.81923	0.863327	0.00640552	87.8533	60.0673	73.9603	1.70247	0.767633	0.0718619
Mycth_2081891	Vacuolar (H+)-ATPase G subunit	121.539	103.769	112.654	89.9091	91.2942	90.6017	0.804249	-0.314286	0.577544	131.129	105.625	118.377	87.796	89.728	88.762	0.749824	-0.415375	0.388209	103.822	90.2692	97.0458	1.07113	0.0991285	0.766916	127.206	112.331	119.769	1.34932	0.432237	0.733492
Mycth_2081895	Hypothetical protein	5.88537	5.43003	5.6577	8.81564	8.1974	8.50652	1.50353	0.588353	0.0840999	6.34152	9.17956	7.76054	11.1568	9.57504	10.3659	1.33572	0.417619	0.0637588	11.1227	12.071	11.5969	1.36329	0.447095	0.597362	14.3423	11.656	12.9992	1.25403	0.326571	1
Mycth_2082040		26.7764	19.3817	23.0791	17.2404	17.0352	17.1378	0.74257	-0.429402	0.392042	26.8834	22.4332	24.6583	17.8538	17.4742	17.664	0.71635	-0.481263	0.37142	27.0657	15.6545	21.3601	1.24637	0.317737	0.742601	32.564	28.012	30.288	1.71468	0.777935	0.123924
Mycth_2082154	Mitochondrial ribosomal protein 10	181.107	190.801	185.954	179.417	170.528	174.973	0.940946	-0.0878157	0.969587	198.849	203.42	201.134	194.932	195.411	195.172	0.970354	-0.0434166	0.18472	169.856	178.126	173.991	0.994391	-0.00811471	0.449562	242.828	219.36	231.094	1.18405	0.243736	0.796258
Mycth_2082262	Glycosyltransferase Family 20 protein	98.2237	95.7627	96.9932	159.509	171.716	165.612	1.70746	0.771855	4.93e-06	79.259	77.3075	78.2832	151.097	154.566	152.831	1.95229	0.965164	2.91555e-21	53.3795	59.2895	56.3345	0.340159	-1.55572	8.9099e-16	56.4819	55.1924	55.8372	0.365352	-1.45264	5.00088e-20
Mycth_2082283	Aldose 1-epimerase	49.5133	39.9482	44.7307	59.8434	59.5118	59.6776	1.33415	0.415924	0.0268372	59.9627	50.7535	55.3581	86.5523	84.8459	85.6991	1.54809	0.630485	7.53056e-10	78.4452	60.3177	69.3815	1.16261	0.217361	0.954254	56.6417	51.2924	53.967	0.629727	-0.667202	2.41305e-06
Mycth_2082522	CP2 transcription factor	59.555	60.3152	59.9351	71.3642	78.6767	75.0204	1.25169	0.323883	0.0565581	42.2108	32.4691	37.34	97.9602	103.498	100.729	2.69763	1.43169	9.01401e-38	14.949	22.1494	18.5492	0.247255	-2.01593	1.25007e-23	31.2599	44.0036	37.6318	0.373593	-1.42046	2.49336e-18
Mycth_2082794		21.2303	15.7716	18.501	0.453138	0.571469	0.512304	0.0276907	-5.17446	8.41e-33	21.0347	13.0669	17.0508	1.08017	1.15822	1.1192	0.0656389	-3.92931	1.23411e-10	0.393856	2.14259	1.26822	2.47553	1.30774	0.707641	0.237442	0.67539	0.456416	0.407807	-1.29404	0.23325
Mycth_2082917	Biotin/lipoyl attachment	128.844	118.09	123.467	95.256	100.968	98.1119	0.794639	-0.331628	0.511305	150.157	128.737	139.447	106.789	117.556	112.172	0.804407	-0.314003	0.780271	139.819	115.504	127.661	1.30118	0.379821	0.532893	122.89	114.548	118.719	1.05836	0.0818297	0.317332
Mycth_2083273		144.838	136.933	140.886	112.216	114.387	113.302	0.80421	-0.314356	0.569548	140.286	149.28	144.783	133.737	124.219	128.978	0.890836	-0.166768	0.650043	150.005	137.8	143.903	1.27008	0.344925	0.647236	139.513	123.897	131.705	1.02114	0.0301868	0.222412
Mycth_2083946	ATPase, P-type, K/Mg/Cd/Cu/Zn/Na/Ca/Na/H-transporter	25.6629	16.2552	20.959	20.7921	20.8967	20.8444	0.994532	-0.00791022	0.835546	28.6181	22.8338	25.726	21.7233	23.4826	22.603	0.878605	-0.186713	0.758792	19.8916	12.9255	16.4085	0.78719	-0.345216	0.0378702	20.5884	14.8748	17.7316	0.784483	-0.350187	0.00210449
Mycth_2084007	Phox-like	213.593	192.037	202.815	211.539	199.649	205.594	1.0137	0.0196374	0.73914	236.907	237.751	237.329	221.595	213.004	217.299	0.915602	-0.127207	0.424501	151.185	139.287	145.236	0.706422	-0.501398	0.00265764	172.218	193.376	182.797	0.841224	-0.249438	0.00613933
Mycth_2084107		22.5702	19.7658	21.168	13.2158	14.1412	13.6785	0.646187	-0.629976	0.116502	22.5958	18.8553	20.7256	14.2867	15.5044	14.8955	0.718704	-0.476531	0.426974	25.8929	17.9682	21.9305	1.60329	0.681033	0.135337	21.4254	20.1331	20.7792	1.395	0.480262	0.709898
Mycth_2084160	RNA recognition motif, RNP-1	63.3183	65.5846	64.4514	57.6807	61.2902	59.4855	0.92295	-0.115676	1	63.5309	74.3747	68.9528	74.9077	70.0821	72.4949	1.05137	0.072271	0.164542	72.6127	71.8064	72.2095	1.2139	0.279653	0.850958	52.6208	54.9935	53.8071	0.742219	-0.430082	0.000835717
Mycth_2084256	AAA ATPase, conserved site	100.771	103.33	102.05	84.8209	85.2133	85.0171	0.83309	-0.263456	0.715307	99.1091	98.8222	98.9656	91.6208	96.4621	94.0414	0.950243	-0.0736314	0.256316	77.5421	89.7874	83.6647	0.984093	-0.0231337	0.411634	95.2294	113.306	104.268	1.10874	0.148924	0.605582
Mycth_2084292		6.95362	5.47795	6.21578	3.76513	4.08319	3.92416	0.631322	-0.663553	0.158963	8.91689	5.97855	7.44772	3.84857	4.70763	4.2781	0.574418	-0.799827	0.0964538	19.1905	12.6489	15.9197	4.05685	2.02036	2.1074e-09	7.91719	4.80139	6.35929	1.48647	0.571894	0.59478
Mycth_2084467	Helicase, superfamily 1 and 2, ATP-binding	7.78031	3.71126	5.74578	5.53216	5.08514	5.30865	0.923921	-0.114158	1	8.34944	5.77034	7.05989	4.68173	3.49621	4.08897	0.579183	-0.787909	0.092377	15.6519	8.94779	12.2998	2.31694	1.21222	0.0181198	12.4235	6.38924	9.40639	2.30043	1.20191	0.167059
Mycth_2084531	Mercuric reductase	260.581	284.521	272.551	171.905	168.627	170.266	0.624713	-0.678734	0.092673	259.712	237.431	248.572	223.701	238.635	231.168	0.929985	-0.10472	0.353167	163.885	142.666	153.276	0.900213	-0.151662	0.173138	206.914	231.187	219.051	0.947583	-0.0776762	0.070127
Mycth_2084627	Mov34/MPN/PAD-1	97.6022	82.1786	89.8904	71.4459	65.944	68.6949	0.764207	-0.387964	0.345923	95.3431	83.1559	89.2495	68.2223	68.704	68.4631	0.767098	-0.382516	0.5029	100.116	93.1466	96.6311	1.40667	0.492285	0.283058	114.316	110.391	112.354	1.64108	0.714648	0.0940571
Mycth_2084695		1603.99	2822.3	2213.14	1338.02	1406.14	1372.08	0.619969	-0.689731	0.690572	1019.58	1796.05	1407.82	1420.72	1571.2	1495.96	1.06261	0.0876165	0.567838	410.091	1036.43	723.259	0.527126	-0.923781	0.0394526	611.133	1429.33	1020.23	0.681988	-0.552181	0.171905
Mycth_2084736	Amine oxidase	133.961	106.556	120.258	66.381	63.2587	64.8198	0.539004	-0.891631	0.000111979	104.401	84.12	94.2607	53.1725	49.5377	51.3551	0.54482	-0.876149	9.76882e-06	203.713	153.528	178.621	2.75565	1.46239	9.29884e-09	180.653	111.081	145.867	2.84036	1.50607	0.00228209
Mycth_2084777		5.39346	8.2356	6.81453	4.39833	4.06237	4.23035	0.620784	-0.687836	0.59784	5.21955	5.81087	5.51521	3.70498	2.84611	3.27555	0.593912	-0.75168	0.23945	4.01648	3.52994	3.77321	0.891938	-0.164985	0.4985	4.81362	4.14911	4.48137	1.36813	0.452203	0.869322
Mycth_2085008		4110.89	4960.61	4535.75	2698.95	2727.49	2713.22	0.598185	-0.741335	0.219558	4802.64	5413.36	5108	4321.45	4416.43	4368.94	0.855314	-0.225474	0.903206	4605.58	5065.85	4835.72	1.78228	0.833723	0.0285014	3570.74	3302.99	3436.87	0.786659	-0.34619	0.000835717
Mycth_2085059	Amino acid-binding ACT	172.435	169.015	170.725	172.713	174.937	173.825	1.01816	0.025964	0.710281	245.375	267.64	256.507	250.187	248.169	249.178	0.971428	-0.0418214	0.255684	220.607	185.355	202.981	1.16773	0.22371	0.95081	457.734	464.273	461.004	1.8501	0.8876	0.00735355
Mycth_2085328	Cysteine, histidine-dependent amidohydrolase/peptidase	4.36614	5.83092	5.09853	9.91548	10.3132	10.1143	1.98378	0.98825	0.000235427	4.18687	3.35468	3.77077	5.88872	7.38613	6.63743	1.76023	0.815763	0.000578195	14.3046	17.5759	15.9402	1.576	0.656268	0.30734	3.61554	3.5709	3.59322	0.541357	-0.885347	0.00155802
Mycth_2085453	Rhamnose mutarotase	13.7092	10.2772	11.9932	12.6206	12.086	12.3533	1.03003	0.0426844	0.77569	13.9151	9.12449	11.5198	13.8005	13.6203	13.7104	1.19016	0.251159	0.0240333	16.6099	7.95771	12.2838	0.994375	-0.00813851	0.775737	12.9342	12.9064	12.9203	0.942368	-0.0856376	0.168995
Mycth_2085599		195.615	136.355	165.985	250.929	245.477	248.203	1.49534	0.580471	0.000735515	167.434	167.315	167.375	257.411	247.728	252.569	1.509	0.593597	4.3908e-11	92.1049	64.7093	78.4071	0.315899	-1.66247	5.26785e-17	92.2355	79.109	85.6722	0.339203	-1.55978	1.67187e-22
Mycth_2085772		38.8777	60.7443	49.811	37.9415	38.9269	38.4342	0.7716	-0.374075	0.856503	36.9496	38.7024	37.826	55.1735	56.3369	55.7552	1.47399	0.559727	2.09126e-08	20.4474	43.5474	31.9974	0.832525	-0.264435	0.4985	23.9275	48.7403	36.3339	0.651668	-0.61779	0.0675017
Mycth_2085895	DNA/pantothenate metabolism flavoprotein, C-terminal	79.6457	74.0593	76.8525	62.5259	62.5344	62.5301	0.813638	-0.297541	0.624345	76.4767	66.6076	71.5421	63.5768	66.5038	65.0403	0.909119	-0.137459	0.542986	64.0831	52.1686	58.1259	0.929566	-0.10537	0.28234	61.0444	64.0881	62.5662	0.961961	-0.0559497	0.111697
Mycth_2085975	Protein of unknown function UPF0016	43.7316	32.7147	38.2231	35.4549	35.8764	35.6657	0.933091	-0.0999096	1	51.5691	35.4572	43.5132	33.458	32.9917	33.2248	0.763558	-0.38919	0.595251	66.7727	48.2571	57.5149	1.61261	0.6894	0.0458862	57.0058	38.0656	47.5357	1.43073	0.51675	0.476876
Mycth_2086155	6-phosphogluconate dehydrogenase, C-terminal-like	12.0308	14.1398	13.0853	11.0091	12.143	11.576	0.88466	-0.176804	0.96551	12.1598	9.92183	11.0408	9.57772	9.5193	9.54851	0.864837	-0.2095	0.889222	13.0785	14.8962	13.9873	1.2083	0.272979	0.904521	17.2114	16.1692	16.6903	1.74795	0.80566	0.0617895
Mycth_2086212	Transcription initiation factor IIA, gamma subunit, N-terminal	74.123	63.2013	68.6621	49.1316	50.3587	49.7452	0.724492	-0.464958	0.2242	77.3628	77.7736	77.5682	66.095	69.8349	67.965	0.876197	-0.190674	0.750574	62.0438	52.8721	57.458	1.15505	0.207951	0.996088	80.2034	78.4049	79.3042	1.16684	0.222605	0.745946
Mycth_2086248	Adenylate kinase, zinc-finger lid region	41.7079	39.776	40.7419	81.1839	78.4799	79.8319	1.95945	0.970451	2.57e-08	32.6807	32.9492	32.815	38.3786	35.941	37.1598	1.1324	0.179387	0.00451098	47.4212	46.246	46.8336	0.586652	-0.769422	2.13103e-05	57.7325	63.454	60.5933	1.63061	0.705416	0.155532
Mycth_2086391	Heat shock protein Hsp70	279.101	273.727	276.414	372.207	359.895	366.051	1.32428	0.405214	0.0161405	362.761	391.503	377.132	340.448	352.747	346.598	0.919035	-0.121809	0.508478	391.052	407.113	399.083	1.09024	0.124643	0.792968	545.778	557.515	551.646	1.5916	0.670482	0.123924
Mycth_2086451	DNA mismatch repair, conserved site	23.9823	17.4587	20.7205	17.5993	15.8536	16.7264	0.807243	-0.308926	0.591573	32.2134	22.3655	27.2894	20.7172	19.4612	20.0892	0.736152	-0.441924	0.433786	28.7051	20.962	24.8336	1.48469	0.570162	0.162659	31.794	23.2312	27.5126	1.36952	0.453672	0.675437
Mycth_2086470	Ribosomal protein L23/L15e, core	77.463	77.0318	77.2474	73.8251	79.2937	76.5594	0.991094	-0.0129062	0.814163	90.591	74.6252	82.6081	78.9407	81.0419	79.9913	0.968323	-0.0464401	0.255353	109.249	116.705	112.977	1.47568	0.561379	0.198881	130.267	128.724	129.496	1.61887	0.69499	0.12455
Mycth_2086520	Cell division/GTP binding protein	253.654	266.213	259.934	385.784	392.775	389.279	1.49761	0.582662	0.000472052	241.155	270.383	255.769	370.296	381.486	375.891	1.46965	0.555474	7.34018e-08	211.323	196.42	203.872	0.523716	-0.933144	2.62646e-07	249.929	251.667	250.798	0.66721	-0.583788	3.60356e-06
Mycth_2086714	PAS fold-3	48.6967	41.1681	44.9324	30.6746	29.9499	30.3122	0.674618	-0.567856	0.0634159	53.5668	51.517	52.5419	32.7971	30.7755	31.7863	0.604971	-0.725062	0.00251508	41.4175	33.4515	37.4345	1.23496	0.304468	0.738526	52.939	41.8752	47.4071	1.49143	0.576697	0.323981
Mycth_2086729	Deoxyribonuclease, TatD-related	24.2593	17.8029	21.0311	28.8137	30.4216	29.6177	1.40828	0.493935	0.0124328	24.4619	23.8642	24.163	26.1012	23.8189	24.96	1.03298	0.0468177	0.106685	19.1152	13.6994	16.4073	0.553969	-0.852122	3.92488e-05	34.4089	25.001	29.705	1.1901	0.251084	0.845753
Mycth_2086739		117.075	113.582	115.329	110.896	116.028	113.462	0.983812	-0.0235455	0.83106	114.02	124.291	119.156	117.523	117.19	117.357	0.9849	-0.0219515	0.206556	74.0184	77.6641	75.8413	0.66843	-0.581152	0.000708369	71.9876	100.126	86.0566	0.733292	-0.447541	0.0116356
Mycth_2086765		43.2216	48.3416	45.7816	39.7945	44.7969	42.2957	0.923857	-0.114258	1	52.824	48.4264	50.6252	47.8292	51.9301	49.8797	0.985273	-0.0214044	0.204122	42.7989	44.0474	43.4232	1.02666	0.0379539	0.582494	66.6149	64.9364	65.7756	1.31869	0.399101	0.838103
Mycth_2086777	ATPase, V1/A1 complex, subunit F	101.907	118.546	110.226	67.7217	66.4374	67.0795	0.608563	-0.716521	0.174711	118.116	108.505	113.31	80.716	82.5539	81.6349	0.720454	-0.473022	0.214748	74.0994	72.3357	73.2175	1.0915	0.126317	0.821969	108.064	104.413	106.239	1.30139	0.380051	0.88038
Mycth_2086920		304.524	349.652	327.088	207.172	203.074	205.123	0.62712	-0.673187	0.190275	193.473	185.87	189.671	265.39	284.898	275.144	1.45063	0.536684	3.30981e-08	143.248	153.622	148.435	0.723639	-0.466657	0.0061529	84.9738	129.544	107.259	0.389828	-1.35909	3.34982e-12
Mycth_2086957	Oxidative stress survival, Svf1-like	49.8972	43.9813	46.9392	41.4946	39.6666	40.5806	0.864534	-0.210005	0.840269	48.2046	39.8253	44.015	42.4379	43.1423	42.7901	0.972171	-0.0407183	0.24462	48.3369	51.5745	49.9557	1.23102	0.299859	0.796722	66.5075	56.7112	61.6094	1.4398	0.525873	0.457821
Mycth_2087011		22.2611	18.7385	20.4998	17.4047	17.3956	17.4002	0.848798	-0.236507	0.807157	26.7027	21.1584	23.9306	19.2505	18.6025	18.9265	0.790893	-0.338446	0.733662	19.6384	16.3892	18.0138	1.03527	0.0500011	0.679832	22.3837	18.7784	20.5811	1.08742	0.120909	0.505488
Mycth_2087100	SAICAR synthetase	88.4721	90.4594	89.4658	68.8979	70.346	69.622	0.778197	-0.361792	0.451669	77.253	76.2448	76.7489	79.8462	79.4708	79.6585	1.03791	0.0536819	0.056741	66.7059	68.798	67.7519	0.97314	-0.0392809	0.386209	73.0465	82.3551	77.7008	0.975424	-0.0358992	0.132244
Mycth_2087157		45.2002	38.6514	41.9258	113.943	115.728	114.836	2.73902	1.45366	1.28e-15	36.6293	31.8342	34.2317	81.5743	78.1862	79.8803	2.33351	1.2225	1.39039e-23	35.9001	29.8564	32.8782	0.286307	-1.80436	4.97699e-18	24.7268	18.4726	21.5997	0.270401	-1.88683	6.20693e-25
Mycth_2087238		67.1539	69.4109	68.2824	58.7068	72.1802	65.4435	0.958424	-0.0612641	0.930523	71.8009	63.4827	67.6418	86.5566	85.6717	86.1141	1.27309	0.348335	0.000119025	59.9863	89.6425	74.8144	1.14319	0.193065	0.960993	89.4515	112.781	101.116	1.17421	0.231696	0.841283
Mycth_2087375	Protein of unknown function DUF1479	10.6006	9.14531	9.87296	15.1078	13.9324	14.5201	1.4707	0.556499	0.00623716	11.3641	9.26153	10.3128	15.7403	12.9351	14.3377	1.39028	0.475377	4.68817e-05	18.5086	15.1031	16.8058	1.15742	0.210907	0.97602	20.8873	18.6048	19.7461	1.37721	0.461754	0.668683
Mycth_2087474	Anticodon-binding	68.384	51.4849	59.9345	42.9075	44.3951	43.6513	0.728317	-0.457361	0.202931	64.5772	51.3134	57.9453	41.7124	41.254	41.4832	0.715903	-0.482165	0.188197	74.4468	47.0531	60.7499	1.39171	0.476858	0.321314	74.6035	56.0312	65.3173	1.57455	0.654938	0.173133
Mycth_2087521		53.9935	72.0483	63.0209	43.7802	44.0271	43.9036	0.696652	-0.52149	0.622191	56.5897	57.6063	57.098	57.3781	58.0649	57.7215	1.01092	0.0156688	0.150245	42.781	38.3243	40.5527	0.923674	-0.114544	0.30482	43.2116	48.1838	45.6977	0.791692	-0.336988	0.00674697
Mycth_2087754	GCN5-related N-acetyltransferase	17.8864	15.6508	16.7686	14.9139	10.8017	12.8578	0.766781	-0.383113	0.543702	22.5789	16.6924	19.6356	15.7062	12.746	14.2261	0.724505	-0.464933	0.454059	13.4839	10.7114	12.0976	0.940878	-0.0879202	0.513473	22.5805	19.4781	21.0293	1.47822	0.563863	0.522109
Mycth_2087774		70.8181	56.197	63.5075	30.4559	31.941	31.1985	0.491256	-1.02545	3.28e-05	57.3436	41.8316	49.5876	29.8096	31.7457	30.7776	0.620672	-0.688096	0.0224262	40.7254	60.5581	50.6417	1.62321	0.69885	0.493167	48.9933	48.5435	48.7684	1.58454	0.664064	0.217973
Mycth_2087807	alpha-glucosidase	12.1632	7.45283	9.80803	12.3068	11.3145	11.8106	1.20418	0.268053	0.21889	13.1403	10.2953	11.7178	11.2161	9.85498	10.5355	0.899103	-0.153441	0.684898	15.8688	13.1706	14.5197	1.22937	0.297923	0.76547	25.2013	20.8657	23.0335	2.18627	1.12847	0.000369038
Mycth_2087998	RNA recognition motif, RNP-1	88.9144	84.0476	86.481	69.2154	67.5045	68.36	0.790462	-0.339232	0.480554	87.8253	88.3167	88.071	76.2615	77.9403	77.1009	0.875441	-0.191918	0.717525	115.586	128.514	122.05	1.78541	0.836253	0.0357475	129.853	125.125	127.489	1.65353	0.725551	0.0733743
Mycth_2088056	Heat shock protein DnaJ, N-terminal	34.6432	71.2584	52.9508	58.7331	63.0631	60.8981	1.15009	0.201745	0.810266	21.7917	24.7829	23.2873	60.6232	65.0683	62.8458	2.69872	1.43227	8.36235e-27	21.3891	87.9973	54.6932	0.89811	-0.155036	0.750701	21.0678	67.699	44.3834	0.706227	-0.501796	0.331978
Mycth_2088086	ATPase, F1/V1/A1 complex, alpha/beta subunit, nucleotide-binding	777.384	780.706	779.045	750.045	724.457	737.251	0.946352	-0.0795508	0.952379	862.297	803.661	832.979	768.608	757.423	763.015	0.916008	-0.126568	0.419212	908.77	803.936	856.353	1.16155	0.216049	0.973262	1187.87	1095.4	1141.63	1.49621	0.581314	0.275605
Mycth_2088125	Clathrin adaptor, sigma subunit/coatomer, zeta subunit	98.8413	88.3347	93.588	83.4691	81.9779	82.7235	0.883911	-0.178026	0.916903	107.035	94.4897	100.762	86.2146	88.0399	87.1272	0.864679	-0.209763	0.844362	129.417	111.032	120.224	1.45333	0.539361	0.206509	148.069	133.034	140.552	1.61318	0.689907	0.130483
Mycth_2088191	F-actin capping protein, beta subunit	103.638	106.506	105.072	86.979	88.9218	87.9504	0.837047	-0.256619	0.742902	99.3878	101.311	100.349	92.6702	91.9468	92.3085	0.919871	-0.120497	0.436938	140.803	129.462	135.132	1.53646	0.61961	0.105999	138.74	120.768	129.754	1.40565	0.491241	0.543193
Mycth_2088202		80.9027	125.833	103.368	85.16	93.4933	89.3267	0.864164	-0.210623	0.971657	59.1215	56.2454	57.6835	108.419	118.674	113.546	1.96844	0.977053	2.00825e-20	13.5539	114.043	63.7984	0.714214	-0.485571	0.574919	27.0517	76.363	51.7074	0.455385	-1.13484	0.00539518
Mycth_2088290	HSP40/DnaJ peptide-binding	220.6	187.047	203.824	489.625	499.779	494.702	2.42711	1.27924	5.69e-14	183.017	227.892	205.455	336.546	331.651	334.098	1.62614	0.701453	3.53497e-07	105.508	135.045	120.277	0.24313	-2.0402	5.40349e-25	110.51	115.811	113.161	0.338704	-1.5619	6.16243e-23
Mycth_2088454	NAD(P)-binding	29.8063	29.8184	29.8123	28.1635	29.5375	28.8505	0.967737	-0.0473131	0.903963	31.2119	28.7318	29.9718	30.7541	32.9531	31.8536	1.06278	0.0878488	0.0561064	62.1146	50.2819	56.1983	1.94791	0.961929	0.0019454	55.5003	52.7737	54.137	1.69956	0.76516	0.0708105
Mycth_2088473	Ribosomal protein S17	508.955	511.092	510.024	503.341	511.528	507.434	0.994923	-0.00734343	0.791837	500.675	447.563	474.119	435.536	458.648	447.092	0.942995	-0.0846782	0.287325	820.842	813.001	816.922	1.60991	0.686976	0.0474226	891.433	805.525	848.479	1.89777	0.924308	0.00379154
Mycth_2088766	Basic helix-loop-helix dimerisation region bHLH	33.1389	19.0288	26.0839	26.7541	25.2423	25.9982	0.996716	-0.00474569	0.903667	36.8815	27.0882	31.9848	27.3903	28.2253	27.8078	0.869406	-0.201897	0.847905	20.1805	14.4828	17.3316	0.666647	-0.585004	0.00195083	31.2893	23.6796	27.4845	0.988373	-0.0168728	0.16866
Mycth_2088816	Glycosyltransferase Family 66 protein	57.9221	42.7519	50.337	44.0704	45.3129	44.6917	0.887849	-0.171614	0.919334	73.8074	53.9646	63.886	44.6106	42.4215	43.5161	0.681152	-0.553952	0.0879467	64.5248	49.8136	57.1692	1.27919	0.355232	0.592507	73.3979	50.282	61.8399	1.42108	0.506991	0.489885
Mycth_2088876	RNA 3'-terminal phosphate cyclase, insert region	23.9214	17.0391	20.4803	20.3948	17.799	19.0969	0.932452	-0.100898	1	20.5477	16.9594	18.7536	17.9107	15.227	16.5689	0.883505	-0.17869	0.801889	45.5206	38.0734	41.797	2.18868	1.13006	0.000210836	39.8274	25.938	32.8827	1.98461	0.988854	0.0313199
Mycth_2088965	Prefoldin	29.6457	23.4646	26.5552	15.8372	17.3543	16.5958	0.624954	-0.678178	0.0258469	28.1747	27.3684	27.7716	17.5686	18.5011	18.0348	0.649399	-0.622822	0.0544432	22.1377	19.2293	20.6835	1.24631	0.317663	0.752826	21.1956	19.2237	20.2097	1.12059	0.164259	0.615586
Mycth_2089049	Staphylococcal nuclease (SNase-like)	56.4757	48.8387	52.6572	62.8035	60.6838	61.7437	1.17256	0.22966	0.207037	58.704	64.0923	61.3982	47.3959	46.2604	46.8282	0.762696	-0.39082	0.633079	97.5662	96.2335	96.8998	1.56939	0.650202	0.0795244	101.695	91.2353	96.4652	2.05998	1.04263	0.000828839
Mycth_2089137	Protein kinase, core	2.7007	1.64715	2.17393	2.78269	2.71131	2.747	1.26361	0.337554	0.588799	3.10139	1.83316	2.46727	2.42543	1.5632	1.99432	0.808308	-0.307022	0.957022	2.66545	1.40363	2.03454	0.740639	-0.433158	0.337644	4.41403	1.69287	3.05345	1.53108	0.614547	0.810433
Mycth_2089163	WD40 repeat	23.1835	18.6792	20.9314	17.395	17.8526	17.6238	0.841979	-0.248144	0.781	25.7133	23.5389	24.6261	23.8387	22.877	23.3578	0.948498	-0.0762835	0.3764	39.3274	24.5435	31.9354	1.81206	0.857634	0.0298282	39.9791	29.2542	34.6167	1.48202	0.567561	0.374763
Mycth_2089183	Fungal transcriptional regulatory protein, N-terminal	27.1336	19.3576	23.2456	20.3599	19.9432	20.1515	0.866897	-0.206067	0.843286	30.5032	25.4209	27.962	20.4458	19.5725	20.0092	0.715583	-0.482809	0.216551	26.9751	16.9176	21.9463	1.08907	0.123091	0.887507	21.6556	19.2389	20.4473	1.02189	0.0312468	0.265508
Mycth_2089196	Tyrosine protein kinase, active site	15.7033	11.7636	13.7334	14.3992	15.2193	14.8092	1.07834	0.108808	0.55932	21.1882	15.8808	18.5345	14.2064	13.7073	13.9568	0.75302	-0.409239	0.457634	14.6848	12.0179	13.3513	0.901553	-0.149516	0.238791	20.3089	15.4256	17.8672	1.28018	0.356344	0.948028
Mycth_2089248	Thioredoxin-related	54.4992	42.9695	48.7344	50.6255	51.636	51.1307	1.04917	0.06925	0.654573	58.4696	51.068	54.7688	42.9012	51.4326	47.1669	0.8612	-0.215581	0.887608	68.6897	55.273	61.9813	1.21221	0.277643	0.823212	63.6197	52.1638	57.8918	1.22738	0.295585	0.954074
Mycth_2089267	Heat shock protein Hsp70	167.264	134.78	151.022	263.265	267.98	265.623	1.75883	0.814616	1.47e-06	139.543	152.315	145.929	227.17	211.378	219.274	1.50261	0.587466	1.12086e-10	122.456	231.018	176.737	0.665369	-0.587773	0.109769	93.4732	162.613	128.043	0.583942	-0.776104	0.00369766
Mycth_2089286	RNA 3'-terminal phosphate cyclase	10.4631	10.3302	10.3966	8.37239	7.72152	8.04695	0.773996	-0.369603	0.578638	12.9186	9.90948	11.414	8.67211	7.40764	8.03987	0.704385	-0.505564	0.350096	13.5838	11.9533	12.7686	1.58676	0.666085	0.151219	18.7322	11.9589	15.3455	1.90868	0.932573	0.0667044
Mycth_2089545	Short-chain dehydrogenase/reductase SDR	12.7565	11.8049	12.2807	29.0164	27.393	28.2047	2.29667	1.19954	6.93e-09	10.3107	10.6403	10.4755	26.8833	28.3885	27.6359	2.63815	1.39953	2.87457e-20	16.1006	12.5225	14.3116	0.507419	-0.978751	8.04407e-06	30.5711	62.3206	46.4459	1.68064	0.749007	0.714654
Mycth_2089588		117.063	103.765	110.414	141.394	142.084	141.739	1.2837	0.36031	0.0368107	75.7858	82.2768	79.0313	128.16	132.265	130.212	1.64761	0.720372	8.11298e-14	176.875	144.11	160.493	1.13232	0.179276	0.977334	63.3809	69.0104	66.1957	0.508367	-0.976058	3.55775e-11
Mycth_2089610		102.4	88.2647	95.3323	64.3575	65.972	65.1647	0.683553	-0.548874	0.0802192	79.8085	69.1941	74.5013	56.897	63.0218	59.9594	0.80481	-0.313279	0.811068	89.9888	126.838	108.413	1.66368	0.73438	0.401362	54.8908	52.9427	53.9168	0.899221	-0.153252	0.0420825
Mycth_2089701	Calcium-binding EF-hand	5.87352	4.522	5.19776	3.83994	3.82317	3.83155	0.737155	-0.43996	0.483879	6.80624	5.12584	5.96604	4.44483	3.91687	4.18085	0.700774	-0.512978	0.396287	4.19079	3.94032	4.06555	1.06107	0.0855211	0.820222	6.25317	5.86318	6.05817	1.44903	0.535087	0.624889
Mycth_2089733	Amino acid transporter, transmembrane	30.019	27.5759	28.7975	33.0725	30.4011	31.7368	1.10207	0.140214	0.430818	35.1669	32.4804	33.8236	40.2345	37.2671	38.7508	1.14567	0.196193	0.00369229	64.1808	52.668	58.4244	1.8409	0.880414	0.00436394	121.095	103.834	112.465	2.90225	1.53717	1.42768e-09
Mycth_2089819		58.9698	56.2905	57.6302	30.7622	32.5713	31.6667	0.549481	-0.863857	0.000637954	57.4286	55.6285	56.5286	38.0325	37.802	37.9173	0.670763	-0.576125	0.0665484	148.282	193.586	170.934	5.39792	2.4324	0.000315525	63.9284	71.866	67.8972	1.79067	0.840497	0.0771505
Mycth_2089827	GOLD	257.451	244.001	250.726	225.612	213.025	219.319	0.874735	-0.193083	0.87498	270.028	254.655	262.341	225.458	211.974	218.716	0.833708	-0.262386	1	269.107	245.148	257.127	1.17239	0.229454	0.94234	349.787	317.915	333.851	1.52641	0.610146	0.22939
Mycth_2089843	Basic-leucine zipper (bZIP) transcription factor	34.8078	44.6021	39.705	51.9265	55.8219	53.8742	1.35686	0.440276	0.132858	41.5214	40.1266	40.824	63.7229	60.6245	62.1737	1.52297	0.606887	4.95526e-09	29.3179	33.2963	31.3071	0.581115	-0.783106	3.30437e-05	36.0166	51.0104	43.5135	0.69987	-0.514841	0.0061449
Mycth_2089931	Major facilitator superfamily	18.1054	14.5192	16.3123	10.8303	9.5575	10.1939	0.624921	-0.678254	0.0349871	23.8131	17.1411	20.4771	9.81885	8.04714	8.93299	0.436242	-1.1968	3.58233e-05	15.7346	8.62731	12.1809	1.19493	0.256922	0.871919	17.322	11.2033	14.2626	1.59663	0.675027	0.303433
Mycth_2089975	Homeodomain-like	5.08099	4.43378	4.75738	1.18348	2.53196	1.85772	0.390492	-1.35664	0.0209363	8.95419	5.09364	7.02392	2.204	1.52703	1.86551	0.265594	-1.9127	0.00448833	3.02165	1.90768	2.46467	1.32672	0.407859	0.845483	5.55538	4.96108	5.25823	2.81865	1.49501	0.0405114
Mycth_2090056	PUA	90.9763	66.8682	78.9223	74.4067	66.5488	70.4778	0.893002	-0.163264	0.923129	86.0635	81.5823	83.8229	68.6954	64.1706	66.433	0.79254	-0.335444	0.714879	191.534	180.335	185.934	2.6382	1.39955	7.03091e-08	238.985	179.677	209.331	3.15101	1.65581	9.75405e-12
Mycth_2090061	Nitrilase/cyanide hydratase and apolipoprotein N-acyltransferase	22.6508	13.4946	18.0727	15.2124	11.9023	13.5574	0.750156	-0.414737	0.599891	24.3024	19.7012	22.0018	14.6811	15.9186	15.2998	0.695391	-0.524103	0.210018	35.2025	23.3416	29.2721	2.15913	1.11045	0.00131014	25.5436	17.1295	21.3365	1.39456	0.479807	0.644674
Mycth_2090388	Phosphatidylethanolamine-binding protein PEBP	87.147	93.9262	90.5366	87.6298	91.1167	89.3733	0.98715	-0.0186582	0.828784	113.746	111.387	112.566	107.882	105.735	106.809	0.94885	-0.0757486	0.266683	178.171	163.464	170.818	1.91128	0.934541	0.00171813	185.08	158.779	171.929	1.60969	0.686787	0.113175
Mycth_2090403	Protein of unknown function DUF250	49.4657	45.1518	47.3088	36.2386	38.6883	37.4635	0.791892	-0.336624	0.52513	43.8984	44.0318	43.9651	37.7089	39.0541	38.3815	0.872999	-0.195949	0.763294	33.1722	28.9483	31.0602	0.82908	-0.270416	0.072736	28.7763	27.6933	28.2348	0.735636	-0.442937	0.000609544
Mycth_2090548	Ubiquitin-conjugating enzyme, E2	73.9482	77.7382	75.8432	74.7919	78.4702	76.6311	1.01039	0.0149092	0.740045	66.5117	58.6546	62.5832	105.956	110.434	108.195	1.72882	0.789784	3.35595e-14	59.3987	97.2579	78.3283	1.02215	0.0316046	0.769285	49.3267	65.1444	57.2355	0.529005	-0.918647	8.26782e-09
Mycth_2090554	Glutamate/phenylalanine/leucine/valine dehydrogenase	456.308	418.153	437.231	340.752	343.903	342.327	0.782945	-0.353018	0.428356	730.442	738.383	734.412	501.887	489.119	495.503	0.674694	-0.567695	0.0353182	1631.72	1175.27	1403.5	4.09987	2.03558	1.12292e-17	992.296	794.13	893.213	1.80264	0.850109	0.0116972
Mycth_2090568		295.408	286.504	290.956	253.236	255.367	254.301	0.874019	-0.194264	0.879642	304.224	276.596	290.41	269.038	259.999	264.518	0.910845	-0.134723	0.479583	199.633	165.81	182.722	0.718525	-0.47689	0.00425026	338.784	332.912	335.848	1.26966	0.344439	0.973314
Mycth_2090577	ATPase, F1/V1/A1 complex, alpha/beta subunit, nucleotide-binding	88.2212	79.8889	84.055	65.6694	64.6746	65.172	0.775349	-0.367083	0.403146	89.8194	79.5398	84.6796	81.2169	77.8729	79.5449	0.939363	-0.0902452	0.3274	108.897	87.2735	98.0854	1.50502	0.589787	0.119202	107.848	91.2894	99.5686	1.25173	0.323921	1
Mycth_2090608	NAD(P)-binding	134.814	140.35	137.582	121.275	117.725	119.5	0.868571	-0.203284	0.86161	138.204	163.879	151.041	135.71	133.306	134.508	0.890538	-0.167251	0.765886	137.594	129.991	133.792	1.1196	0.162987	0.91608	95.0729	93.9918	94.5323	0.702801	-0.508811	6.08952e-05
Mycth_2090611	Amino acid permease-associated region	20.7065	21.4734	21.0899	18.685	20.1051	19.3951	0.919636	-0.120865	1	19.895	20.9803	20.4376	22.2217	22.8743	22.548	1.10326	0.141774	0.0202661	22.9582	19.4673	21.2128	1.09372	0.129243	0.851632	30.552	24.1005	27.3262	1.21191	0.277285	0.90665
Mycth_2090680	DNA polymerase alpha, subunit B N-terminal	25.8103	21.279	23.5447	21.6061	22.4041	22.0051	0.934612	-0.09756	0.99094	26.4134	24.1159	25.2647	18.8656	18.484	18.6748	0.739167	-0.436028	0.353349	25.9073	20.7005	23.3039	1.05902	0.0827315	0.737725	37.9229	34.3324	36.1276	1.93457	0.952009	0.00507707
Mycth_2090891	Barwin-related endoglucanase	970.343	1097.17	1033.76	529.979	528.916	529.447	0.512158	-0.96534	0.0247145	681.043	801.001	741.022	505.206	560.252	532.729	0.718911	-0.476115	0.57465	833.513	967.947	900.73	1.70126	0.766608	0.114691	194.088	392.288	293.188	0.550352	-0.861573	0.00997971
Mycth_2090897		25.619	17.2336	21.4263	16.4679	15.7311	16.0995	0.751389	-0.412367	0.38201	23.9248	23.9016	23.9132	18.064	19.5694	18.8167	0.786875	-0.345794	0.7644	26.4642	17.8426	22.1534	1.37603	0.460513	0.388418	24.8522	20.988	22.9201	1.21807	0.284597	0.934263
Mycth_2090929	Flavin reductase-like, FMN-binding	81.9524	63.387	72.6697	61.9673	63.9178	62.9426	0.866146	-0.207318	0.845346	95.9612	95.2925	95.6268	69.1101	66.9482	68.0292	0.711402	-0.491262	0.191175	142.969	125.342	134.155	2.13139	1.0918	0.0001421	144.806	121.214	133.01	1.95519	0.967308	0.00317402
Mycth_2090930		90.7443	81.2935	86.0189	81.2404	84.0987	82.6696	0.961063	-0.0572972	0.923089	104.755	102.784	103.77	88.5579	85.789	87.1735	0.840067	-0.251424	0.981949	162.349	156.199	159.274	1.92663	0.946081	0.0019904	196.057	165.296	180.676	2.07261	1.05145	0.000686418
Mycth_2091001	Ribosomal protein S9	148.729	141.537	145.133	137.975	134.544	136.26	0.938859	-0.0910191	0.977605	162.236	154.635	158.436	137.368	126.344	131.856	0.832239	-0.26493	1	210.94	206.81	208.875	1.53292	0.616285	0.103302	259.974	252.064	256.019	1.94165	0.957285	0.00261725
Mycth_2091453	Ribosomal protein L7Ae	93.5464	72.6912	83.1188	76.9402	74.5291	75.7346	0.911161	-0.134222	0.981	107.857	96.1609	102.009	77.2147	73.3143	75.2645	0.737823	-0.438654	0.296926	192.073	177.859	184.966	2.4423	1.28824	1.45029e-06	212.37	155.707	184.038	2.44522	1.28996	1.75762e-06
Mycth_2091473	Cytochrome bd ubiquinol oxidase, 14 kDa subunit	716.706	791.456	754.081	771.078	769.091	770.085	1.02122	0.0302974	0.740045	774.571	787.496	781.034	763.013	808.582	785.797	1.0061	0.00877272	0.0665768	800.329	863.674	832.001	1.0804	0.111569	0.748092	751.808	817.24	784.524	0.998379	-0.00234013	0.14464
Mycth_2091486	AMP-dependent synthetase and ligase	56.329	63.3213	59.8251	43.5588	42.0572	42.808	0.715553	-0.48287	0.396906	61.4644	60.236	60.8502	45.4397	43.9292	44.6844	0.734335	-0.44549	0.307435	103.381	79.3605	91.3708	2.13443	1.09385	0.000100996	96.2777	74.3621	85.3199	1.90939	0.933111	0.00520957
Mycth_2091488	Major sperm protein	102.034	104.117	103.076	102.454	108.95	105.702	1.02548	0.0363019	0.673806	98.8641	101.547	100.206	107.378	104.045	105.711	1.05494	0.0771674	0.0228482	88.7905	87.8159	88.3032	0.835397	-0.259467	0.0583262	83.4656	80.5004	81.983	0.775537	-0.366733	0.000915515
Mycth_2091570	Protein of unknown function DUF6, transmembrane	8.32717	6.8812	7.60419	11.381	10.5618	10.9714	1.44281	0.528882	0.0274329	7.88654	6.03042	6.95848	7.7864	8.38283	8.08461	1.16184	0.216406	0.0646685	7.1127	8.35054	7.73162	0.704707	-0.504905	0.0170566	13.3024	9.09648	11.1995	1.38528	0.470178	0.713342
Mycth_2091689	Ribosomal protein S6	187.207	186.026	186.616	168.675	164.087	166.381	0.891568	-0.165584	0.936135	230.984	204.573	217.779	192.622	199.987	196.305	0.901395	-0.149769	0.554915	241.867	250.415	246.141	1.47938	0.564995	0.167375	314.066	287.45	300.758	1.5321	0.615507	0.220409
Mycth_2091974	Transport protein particle (TRAPP) component, Bet3	38.9826	29.9183	34.4505	28.091	27.966	28.0285	0.81359	-0.297627	0.648509	38.3298	34.4821	36.4059	25.8618	29.8801	27.8709	0.76556	-0.385412	0.578285	41.6508	31.5324	36.5916	1.30551	0.384617	0.547957	37.8703	32.7917	35.331	1.26767	0.342174	0.985906
Mycth_2091985	Cyclin-like F-box	44.8906	39.7356	42.3131	112.972	110.012	111.492	2.63494	1.39777	1.13e-15	46.1522	41.6773	43.9148	73.9401	77.5319	75.736	1.72461	0.786273	6.9124e-15	51.8675	51.1737	51.5206	0.4621	-1.11372	3.12406e-09	46.1869	49.5534	47.8702	0.632066	-0.661853	9.79693e-07
Mycth_2092086	Sterol desaturase	208.633	319.715	264.174	236.669	250.381	243.525	0.921835	-0.117419	1	211.196	252.081	231.639	305.054	325.466	315.26	1.361	0.444666	0.00101153	282.156	370.09	326.123	1.33918	0.421346	0.719752	163.457	269.895	216.676	0.687293	-0.541003	0.0362247
Mycth_2092214		31.6833	25.5017	28.5925	18.0577	18.8482	18.4529	0.645377	-0.631785	0.037078	37.1267	25.4775	31.3021	17.438	19.3386	18.3883	0.587447	-0.76747	0.0537536	21.4994	22.3055	21.9024	1.18693	0.24724	0.938858	21.7965	17.8324	19.8144	1.07756	0.107763	0.454679
Mycth_2092294		17.243	11.3273	14.2851	11.323	12.1478	11.7354	0.821509	-0.283651	0.723992	20.2187	13.5372	16.8779	9.95771	10.6289	10.2933	0.609869	-0.713428	0.106049	20.1275	15.3789	17.7532	1.51279	0.597215	0.192814	19.3653	13.0384	16.2018	1.57401	0.654448	0.293259
Mycth_2092357		33.5965	24.4456	29.0211	25.9851	25.9945	25.9898	0.895549	-0.159156	0.938203	50.8943	36.8777	43.886	28.2208	24.5355	26.3782	0.601061	-0.734417	0.0187875	36.8714	30.0817	33.4766	1.28807	0.365208	0.583243	37.333	26.0332	31.6831	1.20111	0.26437	0.873242
Mycth_2092438	PHF5-like	66.6805	64.9615	65.821	63.1798	62.527	62.8534	0.954915	-0.0665559	0.937284	58.3536	56.4195	57.3866	67.0211	69.0119	68.0165	1.18523	0.24517	0.00231843	55.9727	56.8095	56.3911	0.897184	-0.156524	0.191588	59.4931	56.6528	58.073	0.853807	-0.228018	0.0197814
Mycth_2092577	Ras GTPase	46.4824	32.9391	39.7107	44.4258	45.6977	45.0617	1.13475	0.182373	0.347644	49.0425	37.6277	43.3351	38.2616	41.1657	39.7136	0.916431	-0.125902	0.560219	54.3984	42.3108	48.3546	1.07308	0.101751	0.796722	47.1432	34.6736	40.9084	1.03008	0.0427633	0.298886
Mycth_2092688	AMP-dependent synthetase and ligase	38.1686	27.9417	33.0552	35.5317	32.6558	34.0937	1.03142	0.0446296	0.706213	26.3253	24.3613	25.3433	15.1434	15.5246	15.334	0.605051	-0.724871	0.00560624	42.9028	29.1354	36.0191	1.05647	0.0792561	0.762634	18.5537	14.02	16.2868	1.06214	0.0869722	0.403089
Mycth_2092861		528.944	552.805	540.875	545.186	547.783	546.485	1.01037	0.0148864	0.728668	472.717	532.1	502.408	600.464	605.195	602.83	1.19988	0.26289	0.00278917	359.936	343.13	351.533	0.643263	-0.63652	0.000188714	113.033	115.524	114.278	0.18957	-2.3992	7.31879e-45
Mycth_2093040	Amino acid permease-associated region	11.8449	7.78402	9.81447	12.7321	12.4813	12.6067	1.2845	0.361208	0.118979	13.1226	10.6441	11.8833	12.398	13.0075	12.7028	1.06896	0.0962039	0.105489	14.9994	8.9538	11.9766	0.950018	-0.073974	0.458026	20.6307	16.8606	18.7456	1.47571	0.561412	0.437865
Mycth_2093073	PUA	29.156	21.5534	25.3547	25.9223	24.2185	25.0704	0.988788	-0.0162667	0.886451	31.5491	25.6608	28.605	21.4803	22.4984	21.9894	0.768725	-0.379461	0.649889	51.3707	50.4604	50.9155	2.0309	1.02212	0.00211209	50.3225	34.3589	42.3407	1.92551	0.94524	0.0201464
Mycth_2093133	Nickel/cobalt transporter, high-affinity	41.0655	31.6516	36.3585	3.49723	2.77114	3.13419	0.0862022	-3.53613	6.96e-51	42.1475	32.5081	37.3278	3.40924	2.57854	2.99389	0.0802053	-3.64016	9.66133e-66	21.3061	11.5182	16.4121	5.23648	2.3886	0.000277848	8.03147	8.68755	8.35951	2.79219	1.4814	0.000375499
Mycth_2093327	HAD-superfamily hydrolase, subfamily IIIA	10.411	7.6466	9.02881	7.96496	7.14976	7.55736	0.837027	-0.256653	0.780849	16.0511	11.6976	13.8743	7.74451	8.35219	8.04835	0.580089	-0.785654	0.00842935	12.8742	7.56823	10.2212	1.35249	0.435615	0.513311	17.0117	12.3922	14.702	1.82671	0.869245	0.0492351
Mycth_2093591	Hypothetical protein	105.153	92.2177	98.6855	107.254	98.854	103.054	1.04427	0.0624915	0.671156	116.971	100.998	108.984	97.8908	112.36	105.125	0.964592	-0.0520088	0.304572	124.897	146.556	135.727	1.31704	0.397301	0.645857	202.766	155.333	179.05	1.7032	0.768249	0.0685339
Mycth_2093728	Ubiquitin interacting motif	19.4875	15.2992	17.3934	14.0637	15.2142	14.6389	0.84164	-0.248724	0.773497	20.5365	18.0793	19.3079	16.4729	17.843	17.158	0.888648	-0.170316	0.707221	11.6381	15.1131	13.3756	0.9137	-0.130208	0.351711	22.0965	22.8001	22.4483	1.30833	0.387729	0.873626
Mycth_2093740	Zinc finger, C2H2-type	18.7054	17.8601	18.2827	15.5107	16.5149	16.0128	0.875845	-0.191253	0.909196	19.7395	16.118	17.9288	20.0969	20.7156	20.4062	1.13818	0.186734	0.0140437	23.4651	21.5635	22.5143	1.40602	0.491613	0.337659	25.0172	22.7799	23.8985	1.17114	0.227912	0.774585
Mycth_2093808	Peroxisome membrane anchor protein Pex14p, N-terminal	43.3555	37.7434	40.5495	28.0856	28.0828	28.0842	0.692591	-0.529924	0.121274	45.2107	46.5386	45.8746	30.9242	30.608	30.7661	0.670656	-0.576356	0.0799655	31.0372	21.8168	26.427	0.940991	-0.0877471	0.36628	45.0962	40.1042	42.6002	1.38465	0.469519	0.638091
Mycth_2094032	Phospholipid methyltransferase	38.1309	36.0256	37.0782	37.472	37.3483	37.4102	1.00895	0.0128578	0.783404	44.6161	32.922	38.769	36.3323	36.7863	36.5593	0.943003	-0.0846663	0.435055	51.181	44.5545	47.8677	1.27954	0.355623	0.633515	65.7256	41.0181	53.3718	1.45987	0.54584	0.532295
Mycth_2094250	NAD(P)-binding	11.5269	10.2544	10.8906	18.595	17.8484	18.2217	1.67315	0.742568	0.000809684	16.9662	10.2469	13.6065	20.352	20.1883	20.2701	1.48973	0.575054	0.000161254	26.9895	16.3935	21.6915	1.19042	0.251472	0.852278	14.5052	10.1326	12.3189	0.607737	-0.718481	5.61418e-05
Mycth_2094324	beta-galactosidase	9.52364	6.11867	7.82115	9.99482	9.5016	9.74821	1.24639	0.317756	0.158643	8.66849	7.22833	7.94841	8.38114	8.47667	8.4289	1.06045	0.0846792	0.116404	24.7978	15.8028	20.3003	2.08246	1.05829	0.00302676	17.9046	12.4587	15.1817	1.80114	0.848913	0.0424482
Mycth_2094326	Bacterial surface antigen (D15)	66.538	52.6941	59.616	54.2662	50.5578	52.412	0.87916	-0.185803	0.885619	75.3504	62.1348	68.7426	57.4229	51.8864	54.6546	0.795062	-0.330861	0.714498	80.6182	68.4101	74.5141	1.4217	0.507617	0.246651	70.4094	60.687	65.5482	1.19932	0.262213	0.854649
Mycth_2094591	Alcohol dehydrogenase, zinc-binding	2.3131	2.45471	2.38391	0.919283	1.34074	1.13001	0.474015	-1.07699	0.118821	1.87268	1.78987	1.83128	1.73916	1.76442	1.75179	0.956596	-0.0640177	0.787916	8.48479	5.36278	6.92379	6.1272	2.61523	6.43365e-09	2.21735	1.38648	1.80191	1.02861	0.0406988	0.733934
Mycth_2094697		248.649	202.814	225.732	203.314	215.831	209.573	0.928416	-0.107156	1	239.694	215.844	227.769	214.1	196.507	205.304	0.901368	-0.149812	0.540118	277.443	315.421	296.432	1.41446	0.500249	0.397775	224.877	232.856	228.866	1.11477	0.156746	0.507472
Mycth_2094824	Haem peroxidase, animal	1.11858	0.966018	1.0423	1.33788	1.18992	1.2639	1.21261	0.278118	0.555205	0.770718	0.783551	0.777134	1.09334	1.1987	1.14602	1.47467	0.560394	0.0564741	0.515187	0.49137	0.503279	0.398194	-1.32846	0.00184916	0.695127	0.804571	0.749849	0.654308	-0.611958	0.0687307
Mycth_2094933	Protein kinase ATP binding, conserved site	91.764	72.6674	82.2157	67.3134	65.1006	66.207	0.805284	-0.312431	0.551289	88.0139	73.1203	80.5671	67.2303	62.1717	64.701	0.803069	-0.316404	0.766048	114.919	83.6488	99.2837	1.4996	0.584574	0.118218	126.93	103.303	115.117	1.77921	0.831237	0.0198665
Mycth_2095026		16.7763	18.6582	17.7172	10.9922	12.9697	11.9809	0.676232	-0.56441	0.313341	15.3226	13.9129	14.6178	13.2278	13.147	13.1874	0.902152	-0.148557	0.66143	6.47369	15.2341	10.8539	0.905932	-0.142526	0.67525	14.1699	18.0291	16.0995	1.22082	0.287852	0.953043
Mycth_2095112	Histidine triad (HIT) protein	438.885	446.637	442.761	341.863	344.536	343.2	0.775135	-0.367481	0.405436	329.919	335.093	332.506	399.238	404.311	401.774	1.20832	0.273006	0.000109547	254.722	237.287	246.005	0.716797	-0.480363	0.00366135	166.71	198.225	182.468	0.454155	-1.13874	7.85151e-14
Mycth_2095122	Aminotransferase, class I and II	51.7597	43.9072	47.8334	47.3985	45.6427	46.5206	0.972553	-0.0401506	0.895226	60.8973	46.0387	53.468	46.9112	47.3382	47.1247	0.881363	-0.182192	0.75395	55.845	41.1448	48.4949	1.04244	0.0599634	0.693454	65.24	52.2245	58.7322	1.24632	0.317669	1
Mycth_2095162		12.5888	7.55609	10.0725	7.85595	8.31698	8.08646	0.802829	-0.316835	0.708103	12.0894	9.23722	10.6633	7.40057	7.64339	7.52198	0.705407	-0.503473	0.37142	31.8531	21.41	26.6316	3.29335	1.71956	7.00251e-09	26.4176	14.7118	20.5647	2.73395	1.45099	0.0290926
Mycth_2095260	AAA ATPase, conserved site	86.7132	96.1396	91.4264	82.8314	80.493	81.6622	0.893202	-0.162942	0.959803	90.5731	92.7675	91.6703	96.1328	90.588	93.3604	1.01844	0.0263563	0.0639064	79.2429	108.585	93.9137	1.15003	0.201667	0.980101	112.439	129.165	120.802	1.29393	0.371765	0.925446
Mycth_2095291	C-5 cytosine-specific DNA methylase	13.5593	8.54985	11.0546	8.36768	8.47397	8.42083	0.761751	-0.392609	0.449857	17.0684	12.4533	14.7609	8.06609	7.15236	7.60923	0.5155	-0.955955	0.000243746	15.924	12.4375	14.1807	1.68401	0.751897	0.0268403	25.1539	16.3446	20.7493	2.72686	1.44724	0.000407816
Mycth_2095369	Major facilitator superfamily	0.72572	0.367711	0.546715	1.01422	1.51318	1.2637	2.31144	1.20879	0.0426561	0.432721	0.341028	0.386875	1.35363	0.997057	1.17534	3.03805	1.60314	0.0028189	1.21211	0.306535	0.759321	0.60087	-0.734874	0.324064	0.52591	0.679069	0.60249	0.512607	-0.964076	0.0668151
Mycth_2095444	Sulphatase	0.217126	0.503213	0.360169	1.28752	1.08578	1.18665	3.2947	1.72015	0.00227197	0.124669	0.383184	0.253927	0.217668	0.0807912	0.14923	0.587689	-0.766875	0.867121	0.547632	5.50493	3.02628	2.55028	1.35065	0.724008	0.382781	0.382781	0.382781	2.56505	1.35898	0.499083
Mycth_2095451	Alkyl hydroperoxide reductase/ Thiol specific antioxidant/ Mal allergen	1581.97	1755.86	1668.91	1058.62	1043.52	1051.07	0.629794	-0.667048	0.130436	1502.4	1907.53	1704.97	1026.6	1036.24	1031.42	0.604952	-0.725107	0.2863	898.486	671.669	785.078	0.746932	-0.420951	0.00892586	2217.1	2174.3	2195.7	2.12881	1.09004	0.000120511
Mycth_2095534	RPEL repeat	147.679	140.291	143.985	44.3092	42.8913	43.6002	0.302811	-1.72351	2.2e-16	126.616	110.564	118.59	45.9545	54.6297	50.2921	0.424083	-1.23758	1.79309e-11	26.1714	27.2277	26.6995	0.612371	-0.707521	0.00037637	24.0516	30.957	27.5043	0.546891	-0.870674	6.80535e-05
Mycth_2095610	Protein kinase, core	90.3023	83.7419	87.0221	86.9117	84.0474	85.4795	0.982274	-0.0258029	0.847572	77.0539	76.3846	76.7192	77.8698	73.4576	75.6637	0.986241	-0.0199875	0.132361	70.9206	51.3583	61.1395	0.715253	-0.483475	0.00490756	72.4553	59.2022	65.8287	0.870018	-0.200883	0.0162448
Mycth_2095639		78.3659	33.8044	56.0852	50.4429	50.3835	50.4132	0.898869	-0.153817	0.983587	27.9519	17.0525	22.5022	30.9919	32.4331	31.7125	1.40931	0.494984	0.00166844	24.3874	14.4464	19.4169	0.385154	-1.37649	6.30206e-10	5.8163	4.59559	5.20595	0.164161	-2.60682	5.89981e-28
Mycth_2095744	GRIM-19	153.272	148.614	150.943	125.869	131.548	128.709	0.852698	-0.229894	0.806107	150.908	140.513	145.711	135.349	146.551	140.95	0.967326	-0.0479261	0.21939	175.961	148.245	162.103	1.25946	0.332803	0.672327	185.397	176.885	181.141	1.28514	0.361929	0.930502
Mycth_2095899	Lipocalin	22.7317	21.5552	22.1434	16.9867	18.1709	17.5788	0.79386	-0.333043	0.640205	25.6681	24.846	25.257	19.7056	20.8088	20.2572	0.802043	-0.318248	0.869912	17.5904	13.6907	15.6405	0.889738	-0.168547	0.291355	30.7708	24.1067	27.4388	1.35452	0.437779	0.774
Mycth_2095925	Proteasome maturation factor UMP1	133.129	104.753	118.941	84.2017	79.327	81.7643	0.687434	-0.540707	0.0922206	134.406	96.2024	115.304	82.2944	73.6872	77.9908	0.676391	-0.56407	0.144155	141.768	115.18	128.474	1.57127	0.651935	0.0792371	157.498	125.935	141.716	1.81709	0.861631	0.0202726
Mycth_2096067	Scavenger mRNA decapping enzyme, N-terminal	79.7864	53.1196	66.453	76.2405	68.9746	72.6075	1.09262	0.127785	0.4717	82.5611	71.4605	77.0108	76.8493	72.5801	74.7147	0.970185	-0.0436682	0.211745	67.8221	47.7367	57.7794	0.795777	-0.329565	0.0417296	77.9405	64.7259	71.3332	0.954741	-0.066819	0.0929262
Mycth_2096092	Phospholipase D/Transphosphatidylase	181.415	154.313	167.864	131.628	130.081	130.854	0.779526	-0.359331	0.407304	163.428	149.059	156.244	90.3755	86.1673	88.2714	0.564959	-0.823782	3.32279e-05	97.5656	84.3346	90.9501	0.69505	-0.524812	0.00180991	140.47	144.836	142.653	1.61607	0.692489	0.104466
Mycth_2096131	Bromodomain	165.66	167.071	166.365	115.607	116.022	115.815	0.696147	-0.522537	0.0939576	156.553	146.299	151.426	131.717	133.605	132.661	0.876079	-0.190867	0.727122	61.7463	52.9286	57.3375	0.495079	-1.01427	7.92427e-08	64.9685	68.548	66.7582	0.503225	-0.990726	2.56817e-11
Mycth_2096246	Nonaspanin (TM9SF)	38.8263	35.9834	37.4048	30.3232	32.3278	31.3255	0.837472	-0.255887	0.746937	41.1699	37.4686	39.3193	31.6516	34.1023	32.877	0.836154	-0.258159	1	40.7259	35.1894	37.9576	1.21172	0.277054	0.831737	56.1959	42.2348	49.2153	1.49695	0.58203	0.313703
Mycth_2096307	Forkhead-associated	40.5365	29.4557	34.9961	31.3777	29.9978	30.6877	0.876891	-0.18953	0.877285	29.3199	28.7795	29.0497	21.0115	18.8314	19.9214	0.685771	-0.544202	0.118598	39.5893	32.0603	35.8248	1.1674	0.223298	0.944159	63.7339	68.5014	66.1176	3.31892	1.73071	2.09485e-07
Mycth_2096317	UbiA prenyltransferase	19.206	12.4701	15.838	55.7359	55.9889	55.8624	3.52711	1.81849	5.48e-22	13.2144	9.15159	11.183	36.3901	32.3121	34.3511	3.07173	1.61905	6.91794e-32	5.17208	4.5867	4.87939	0.0873465	-3.51711	4.93293e-49	2.72083	2.03155	2.37619	0.0691736	-3.85363	6.06482e-63
Mycth_2096341	Ribosomal protein S12, bacterial-type	147.274	146.552	146.913	143.557	135.535	139.546	0.949856	-0.0742194	0.949033	139.576	127.355	133.466	119.313	124.168	121.74	0.912147	-0.132662	0.509858	155.465	168.584	162.025	1.16108	0.21547	1	175.9	178.806	177.353	1.45681	0.542814	0.405943
Mycth_2096434	Glutamine amidotransferase superfamily	30.8853	27.2553	29.0703	23.0679	24.1025	23.5852	0.811315	-0.301666	0.633276	29.203	25.7658	27.4844	23.7549	24.0013	23.8781	0.868789	-0.202922	0.832413	57.402	59.6136	58.5078	2.4807	1.31075	2.73543e-06	53.2533	49.6314	51.4424	2.15437	1.10727	0.000382272
Mycth_2096529	Helicase, superfamily 1 and 2, ATP-binding	55.2299	43.5673	49.3986	46.8623	46.6681	46.7652	0.946691	-0.0790339	0.963582	58.6699	49.2891	53.9795	47.791	45.8906	46.8408	0.867752	-0.204645	0.81884	56.3258	60.0482	58.187	1.24424	0.315261	0.749253	60.6271	48.1587	54.3929	1.16123	0.215653	0.71378
Mycth_2096678		60.0121	60.9643	60.4882	57.3286	63.0358	60.1822	0.994941	-0.007317	0.800689	57.3108	56.557	56.9339	59.6716	60.2779	59.9748	1.05341	0.0750678	0.0424327	23.6994	43.8288	33.7641	0.561031	-0.833848	0.0157043	50.1066	60.1492	55.1279	0.919184	-0.121574	0.0847587
Mycth_2096690	Peroxisome membrane protein, Pex16	46.4698	37.2253	41.8476	40.907	39.9534	40.4302	0.966129	-0.0497115	0.920579	48.2831	45.9555	47.1193	46.3207	44.2717	45.2962	0.961309	-0.056928	0.27051	40.6396	27.5554	34.0975	0.843367	-0.245767	0.113431	48.5666	38.7785	43.6725	0.964155	-0.0526633	0.126633
Mycth_2096708		360.952	342.078	351.515	348.077	343.841	345.959	0.984194	-0.0229847	0.833295	356.429	331.946	344.187	321.051	326.135	323.593	0.940166	-0.0890124	0.303221	355.759	364.088	359.923	1.04036	0.0570878	0.609558	345.132	338.558	341.845	1.0564	0.0791604	0.305102
Mycth_2097168	Aldehyde dehydrogenase, conserved site	18.1233	15.7165	16.9199	14.657	13.6833	14.1701	0.837484	-0.255867	0.763915	21.992	16.5992	19.2956	15.146	14.1761	14.661	0.759813	-0.396284	0.519439	14.5153	10.3095	12.4124	0.875955	-0.191072	0.216552	21.0236	15.9982	18.5109	1.26259	0.336387	0.994699
Mycth_2097277		45.3461	33.343	39.3445	37.2929	36.8359	37.0644	0.942048	-0.0861278	0.981652	44.4676	40.3708	42.4192	38.4479	33.7646	36.1062	0.851177	-0.23247	0.92778	55.7886	48.9375	52.3631	1.41276	0.498514	0.276309	48.6306	38.5678	43.5992	1.20753	0.272055	0.885913
Mycth_2097429	NIF system FeS cluster assembly, NifU, C-terminal	70.287	66.0947	68.1908	63.3723	62.2425	62.8074	0.921054	-0.118643	1	61.5156	58.285	59.9003	57.0766	61.3546	59.2156	0.988569	-0.016586	0.164767	67.5784	89.555	78.5667	1.25091	0.322983	0.870441	81.6174	83.1768	82.3971	1.39148	0.476616	0.600831
Mycth_2097501	AMP-dependent synthetase and ligase	105.613	91.7316	98.6725	267.857	252.484	260.171	2.63671	1.39874	3.91e-16	98.2012	101.161	99.6812	334.644	321.072	327.858	3.28907	1.71768	9.48149e-55	50.1592	35.2039	42.6816	0.164052	-2.60777	9.16226e-36	142.737	163.305	153.021	0.466728	-1.09935	8.30415e-14
Mycth_2097570	Chaperonin Cpn60	382.316	392.137	387.226	593.352	585.745	589.549	1.52249	0.606434	0.000286196	430.137	552.12	491.128	536.028	544.83	540.429	1.10038	0.138004	0.191372	413.439	446.169	429.804	0.729039	-0.455933	0.00376921	573.711	579.451	576.581	1.06689	0.0934178	0.326171
Mycth_2097686	WD40 repeat-like	46.7746	32.3273	39.5509	32.3121	33.5242	32.9182	0.832298	-0.264827	0.681536	48.8706	40.8946	44.8826	31.5435	30.3572	30.9503	0.689584	-0.536202	0.065828	38.2051	36.3758	37.2905	1.13282	0.179923	0.950538	43.1381	42.1665	42.6523	1.37809	0.462668	0.619289
Mycth_2097778	Hypothetical protein	64.7174	58.6959	61.7066	56.9689	60.0029	58.4859	0.947805	-0.0773382	0.951062	67.8996	56.619	62.2593	58.1904	56.2368	57.2136	0.918956	-0.121932	0.479583	86.7552	76.5792	81.6672	1.39636	0.481669	0.307882	81.9295	77.4369	79.6832	1.39273	0.477918	0.584786
Mycth_2097810	Signal transduction histidine kinase, phosphotransfer (Hpt) region	133.893	126.083	129.988	84.8831	83.2636	84.0734	0.646778	-0.628657	0.0238028	112.902	101.106	107.004	85.0505	91.6406	88.3456	0.825629	-0.276435	0.951837	47.2604	46.3479	46.8042	0.556706	-0.845012	6.33261e-06	104.998	103.941	104.469	1.18251	0.241851	0.786636
Mycth_2105956		2.37028	2.25975	2.31501	1.98317	3.06251	2.52284	1.08977	0.12403	0.832253	3.54569	3.04839	3.29704	4.43194	2.71553	3.57373	1.08392	0.116261	0.508449	2.77027	1.67448	2.22237	0.880901	-0.182949	0.633109	2.90721	1.97937	2.44329	0.68368	-0.548606	0.151667
Mycth_2106095	Aldo/keto reductase	34.4416	34.7011	34.5714	23.4136	23.8725	23.643	0.68389	-0.548163	0.231294	45.5492	35.1592	40.3542	22.1051	18.4645	20.2848	0.502669	-0.99232	0.00145672	40.1418	42.4414	41.2916	1.74646	0.804434	0.0630299	39.2101	33.6749	36.4425	1.79654	0.845223	0.116499
Mycth_2106114		0.237072	0.845851	0.541462	0.672988	0.545612	0.6093	1.12529	0.170294	0.937284	0.735062	0.434478	0.58477	1.13634	1.12472	1.13053	1.93329	0.951056	0.226412	1.28688	2.02498	1.65593	2.71775	1.44241	0.194799	1.29302	1.5673	1.43016	1.26504	0.33918	1
Mycth_2106248	Glycosyltransferase Family 62 protein	30.6369	20.5322	25.5845	15.5737	16.1698	15.8718	0.620366	-0.688808	0.0324924	37.693	30.3588	34.0259	21.2941	19.7342	20.5142	0.602898	-0.730015	0.0116607	32.7859	21.3002	27.043	1.70385	0.768795	0.0405361	37.7117	25.2	31.4558	1.53337	0.616708	0.313663
Mycth_2106260	ABC transporter-like	60.7921	35.9519	48.372	66.1742	64.4105	65.2923	1.3498	0.432742	0.0365024	55.8191	44.4676	50.1433	36.6394	32.9024	34.7709	0.69343	-0.528177	0.0792463	56.0182	38.4723	47.2452	0.723595	-0.466746	0.00596107	42.3254	33.5212	37.9233	1.09066	0.125205	0.441181
Mycth_2106347	MFS general substrate transporter	9.3456	6.80695	8.07627	3.23119	3.58475	3.40797	0.421973	-1.24478	0.000126117	8.38964	7.86839	8.12902	5.91191	6.35302	6.13246	0.754392	-0.406614	0.655119	8.72102	5.15363	6.93733	2.03562	1.02547	0.0313987	12.5648	10.4875	11.5261	1.87953	0.91037	0.0583879
Mycth_2106437	ATP-grasp fold	17.4077	13.5279	15.4678	15.5809	15.6867	15.6338	1.01073	0.015401	0.800689	17.1293	14.4967	15.813	14.8079	13.7555	14.2817	0.903162	-0.146944	0.671365	35.8744	23.7693	29.8219	1.90752	0.9317	0.00344634	27.3212	21.8	24.5606	1.71972	0.782176	0.078012
Mycth_2106471	Peptidase, trypsin-like serine and cysteine	0.0370096	0	0.0185048	0.0420244	0	0.0210122	1.1355	0.183324	1	0.153002	0.180871	0.166937	0.12522	0.12394	0.12458	0.74627	-0.422231	1	0.62095	0.496763	0.558856	26.5968	4.73318	0.0131563	0.660617	0.274033	0.467325	3.75121	1.90736	0.377287
Mycth_2106506	Peptidase S28; serine protease	2.66955	2.96397	2.81676	2.37679	3.13398	2.75539	0.978211	-0.0317829	0.931227	4.48345	3.29868	3.89107	3.35288	2.70906	3.03097	0.778957	-0.360385	0.823065	4.19156	4.18287	4.18722	1.51965	0.603738	0.402494	6.91903	6.44973	6.68438	2.20536	1.14101	0.0251075
Mycth_2106567		0.086069	0.141732	0.1139	0	0.0440187	0.0220093	0.193233	-2.37158	0.802906	0.133432	0.105158	0.119295	0	0.0480386	0.0240193	0.201344	-2.31226	0.732857	0.0849453	0	0.0424726	1.92976	0.948418	1	0.0426755	0	0.0213378	0.888358	-0.170786	1
Mycth_2106573		0.850435	1.01142	0.930928	1.4485	0.869884	1.15919	1.2452	0.316377	0.833295	1.09868	1.03905	1.06887	1.4387	0.791104	1.1149	1.04307	0.0608339	0.819966	0.97922	1.03772	1.00847	0.869979	-0.200947	0.777509	1.89752	1.72416	1.81084	1.62422	0.699744	0.775702
Mycth_2106582		0.749445	1.18842	0.968933	1.51288	0.681409	1.09714	1.13232	0.179283	0.931511	1.29095	0.712181	1.00157	0.657404	1.58023	1.11882	1.11707	0.159716	0.798328	1.0684	2.54026	1.80433	1.64457	0.717713	0.775737	1.40381	1.58548	1.49464	1.33591	0.417828	0.998189
Mycth_2106616		8.97654	6.91917	7.94786	7.28679	8.16597	7.72638	0.972134	-0.0407731	0.931743	12.3173	9.14728	10.7323	7.32364	7.46196	7.3928	0.688836	-0.537768	0.31054	34.4572	28.0594	31.2583	4.04566	2.01638	3.5689e-12	33.296	24.566	28.931	3.9134	1.96842	5.24465e-11
Mycth_2106642	BTB/POZ fold	4.83057	3.12859	3.97958	2.24912	3.18377	2.71644	0.682596	-0.550897	0.397986	4.15695	3.72883	3.94289	2.09713	2.07569	2.08641	0.529157	-0.918231	0.029449	5.90452	4.78457	5.34455	1.96748	0.976349	0.0235585	3.88834	2.30895	3.09865	1.48516	0.570616	0.615621
Mycth_2106715		4.64934	3.92331	4.28632	2.52146	3.37155	2.94651	0.687421	-0.540735	0.440799	4.23145	4.45113	4.34129	3.24789	2.9823	3.11509	0.71755	-0.478849	0.628922	4.75986	4.1491	4.45448	1.51178	0.596249	0.415256	3.26868	2.34886	2.80877	0.901664	-0.149338	0.354796
Mycth_2106723	Hypothetical protein	173.088	265.334	219.211	225.405	229.886	227.646	1.03848	0.0544695	0.875922	155.095	200.339	177.717	256.107	270.319	263.213	1.48108	0.566649	0.000695566	73.8219	128.421	101.122	0.444207	-1.1707	1.44717e-05	50.5894	81.1592	65.8743	0.25027	-1.99844	1.49375e-31
Mycth_2106732		2.94498	1.67226	2.30862	3.11339	2.90845	3.01092	1.30421	0.383175	0.689763	4.09326	2.10925	3.10126	4.23762	3.96758	4.1026	1.32288	0.403687	0.322495	2.20495	0.743492	1.47422	0.489625	-1.03025	0.163498	4.33026	3.86702	4.09864	0.999035	-0.00139274	0.702653
Mycth_2106779	Ankyrin	7.68962	6.31348	7.00155	5.58464	5.97564	5.78014	0.825551	-0.27657	0.734569	7.55745	6.93105	7.24425	5.70826	6.1873	5.94778	0.821035	-0.284484	0.951056	16.4498	17.5913	17.0205	2.94466	1.5581	1.92542e-06	6.2449	7.47322	6.85906	1.15321	0.205659	0.766378
Mycth_2106818		8.12796	6.03614	7.08205	4.34319	4.84974	4.59646	0.64903	-0.623643	0.220535	15.1126	8.81099	11.9618	6.20108	4.98131	5.59119	0.467421	-1.09721	0.0765311	6.68487	5.59101	6.13794	1.33536	0.41723	0.655608	11.142	8.42891	9.78545	1.75015	0.807482	0.187195
Mycth_2106821	Zinc finger, RING-type	39.6139	34.6096	37.1117	34.7606	36.0275	35.3941	0.953717	-0.0683671	0.944138	47.0091	36.0208	41.5149	37.4188	37.1819	37.3004	0.89848	-0.154441	0.676413	50.2978	36.3463	43.3221	1.22399	0.291595	0.770244	52.306	40.7984	46.5522	1.24804	0.31966	1
Mycth_2106971	Exonuclease	11.5734	12.0856	11.8295	8.54733	9.23944	8.89339	0.751798	-0.411584	0.646706	17.8934	16.0945	16.994	9.33843	10.1883	9.76334	0.574519	-0.799575	0.0898901	19.9657	15.0407	17.5032	1.96811	0.976814	0.0390628	22.4871	17.2183	19.8527	2.03339	1.02389	0.062263
Mycth_2107070		5.82094	4.88149	5.35121	2.93763	3.80398	3.3708	0.629914	-0.666773	0.434564	6.93521	5.63028	6.28275	2.46185	2.25618	2.35901	0.375475	-1.41321	0.0149538	4.62787	3.15683	3.89235	1.15472	0.207549	1	6.09307	2.82205	4.45756	1.88959	0.91807	0.429589
Mycth_2107078		0.391867	0.107549	0.249708	0.222482	0	0.111241	0.445484	-1.16655	0.92009	0.202502	0	0.101251	0	0	0	0	#NUM!	0.906474	0.386751	0	0.193375	1.73835	0.797716	0.960104	0.194299	0.207252	0.200776	#DIV/0!	#DIV/0!	0.744622
Mycth_2107102	Ribosomal protein S19/S15	621.077	689.901	655.489	592.38	605.414	598.897	0.913664	-0.130264	1	648.382	593.925	621.153	554.951	588.874	571.913	0.920727	-0.119154	0.412627	982.266	1013.47	997.866	1.66617	0.736538	0.0281956	1051.41	997.159	1024.28	1.79098	0.840749	0.0155463
Mycth_2107104	Alcohol dehydrogenase, zinc-binding	9.79915	9.88042	9.83978	13.8489	16.0458	14.9474	1.51908	0.603193	0.00950962	12.7357	15.3638	14.0497	20.1111	20.2341	20.1726	1.4358	0.521853	4.99202e-05	19.633	15.8061	17.7195	1.18546	0.245449	0.92486	15.1808	16.9047	16.0428	0.795275	-0.330474	0.01452
Mycth_2107129		0.0993301	0.0726974	0.0860137	0.225578	0.237071	0.231324	2.68939	1.42728	0.572057	0.307981	0.323627	0.315804	0.224051	0.369601	0.296826	0.939908	-0.0894088	0.969579	1.24175	0.727232	0.984494	4.2559	2.08946	0.0397093	0.229837	0.420273	0.325055	1.0951	0.131064	0.962523
Mycth_2107169		10.0555	9.48667	9.77106	4.63854	6.10697	5.37275	0.549864	-0.862854	0.254691	12.5036	10.7499	11.6267	7.44231	6.66468	7.0535	0.606662	-0.721036	0.368464	11.6299	7.09357	9.36173	1.74245	0.801113	0.335674	13.8667	8.64202	11.2544	1.59557	0.674076	0.607151
Mycth_2107175		0.531522	0.259339	0.39543	0.536481	0.362452	0.449466	1.13665	0.18479	0.970899	0.30519	0.360781	0.332985	0.333031	0.0659254	0.199478	0.599061	-0.739226	0.913324	0.816017	0.432385	0.624201	1.38876	0.473798	0.891241	0.585653	0.562226	0.57394	2.8772	1.52467	0.58306
Mycth_2107194	Hypothetical protein	0.283881	0.623298	0.453589	0.859589	0.96791	0.91375	2.01449	1.01041	0.590603	0	0	0	0.74705	0.950674	0.848862	#DIV/0!	#DIV/0!	0.0140163	0	0.461866	0.230933	0.252731	-1.98432	0.178275	0	0	0	0	#NUM!	0.0237185
Mycth_2107239		0	0	0	0.352378	0.317427	0.334902	#DIV/0!	#DIV/0!	0.432189	0.213822	0	0.106911	0.583322	0.115472	0.349397	3.26811	1.70845	0.623897	0.40837	0.378673	0.393522	1.17503	0.232702	1	0.718062	0	0.359031	1.02757	0.0392415	1
Mycth_2107271		10.7801	9.70862	10.2444	3.81151	4.62196	4.21674	0.411615	-1.28063	0.0012551	9.80723	8.67552	9.24138	4.14973	4.53965	4.34469	0.470134	-1.08885	0.0168154	6.05235	6.06512	6.05874	1.43683	0.522891	0.586938	7.04146	3.48232	5.26189	1.21111	0.276328	0.981703
Mycth_2107294		0.988614	0.918344	0.953479	2.07243	1.86687	1.96965	2.06576	1.04667	0.233391	1.33615	1.30079	1.31847	2.91608	2.29204	2.60406	1.97506	0.9819	0.0668175	0.375272	0.278385	0.326828	0.165932	-2.59134	0.00509054	0.980368	1.28705	1.13371	0.435362	-1.19971	0.0547851
Mycth_2107298		3.88934	2.62755	3.25845	24.12	26.0119	25.0659	7.6926	2.94347	1.78e-21	7.42104	6.33591	6.87848	39.7029	29.6119	34.6574	5.03853	2.333	1.19602e-11	21.4566	19.3486	20.4026	0.813957	-0.296976	0.145608	8.90053	12.4475	10.674	0.307987	-1.69906	2.93057e-07
Mycth_2107377		0.374255	0.342386	0.35832	0.708276	0.382814	0.545545	1.52251	0.606448	0.657799	0.838071	0.647784	0.742928	0.281393	0.348145	0.314769	0.423687	-1.23893	0.306504	0.923422	0.875297	0.899359	1.64855	0.7212	0.58134	0.711339	0.329896	0.520617	1.65397	0.725929	0.822121
Mycth_2107379	Thioredoxin-like fold	0.191429	0.30022	0.245825	0.434735	0.279725	0.35723	1.45319	0.539223	0.749048	0.339166	0.100237	0.219702	0.185054	0.061054	0.123054	0.560096	-0.836254	0.787488	1.70037	1.1012	1.40078	3.92124	1.97131	0.00816577	0.867806	0.491756	0.679781	5.52425	2.46578	0.0694278
Mycth_2107416		8.82538	4.37551	6.60045	3.39428	4.95041	4.17234	0.63213	-0.661706	0.580112	11.1809	8.86966	10.0253	3.3713	4.44912	3.91021	0.390035	-1.35832	0.0278342	10.8175	6.42665	8.62205	2.06648	1.04717	0.163295	11.0103	10.2386	10.6244	2.7171	1.44207	0.0610161
Mycth_2107516		11.39	8.7986	10.0943	9.76304	9.56189	9.66247	0.957222	-0.0630745	0.946775	14.7866	12.796	13.7913	11.0442	9.70637	10.3753	0.752307	-0.410606	0.463666	6.85443	4.25425	5.55434	0.574837	-0.798776	0.000210264	13.8019	8.90372	11.3528	1.09422	0.129897	0.526675
Mycth_2107611	Hypothetical protein	1.4757	0.462871	0.969286	1.07721	0.646907	0.862057	0.889373	-0.169139	1	1.852	0.643925	1.24796	0.11888	0.470657	0.294768	0.2362	-2.08192	0.257109	1.76853	1.15759	1.46306	1.69717	0.763132	0.702341	1.35886	1.33796	1.34841	4.57448	2.19361	0.29829
Mycth_2107631	Hypothetical protein	1.66983	1.59196	1.63089	1.19753	1.34843	1.27298	0.780542	-0.357451	0.874444	1.72581	1.66435	1.69508	1.38766	1.07916	1.23341	0.72764	-0.458703	0.835949	4.90072	3.80704	4.35388	3.42022	1.77409	0.00129473	4.66267	2.2311	3.44689	2.7946	1.48264	0.126111
Mycth_2107654		0	0	0	0	0	0	#DIV/0!	#DIV/0!	NA	0	0	0	0.0498222	0	0.0249111	#DIV/0!	#DIV/0!	1	0.305195	0.0539048	0.17955	#DIV/0!	#DIV/0!	0.327991	0.0438075	0	0.0219037	0.879277	-0.185611	1
Mycth_2107761		0.594798	0.217659	0.406229	0.112565	0.1014	0.106983	0.263356	-1.92491	0.720629	0.30737	0	0.153685	0.223607	0.553302	0.388454	2.52761	1.33777	0.649086	0.0978388	0.362895	0.230367	2.15331	1.10655	0.948803	0.491531	1.0486	0.770064	1.98238	0.987232	0.831485
Mycth_2107812	Zinc finger, CCHC-type	0.0230351	0.0505765	0.0368058	0.0261562	0.0471237	0.03664	0.995496	-0.00651291	1	0.142844	0.0562878	0.0995659	0.0519584	0.205709	0.128834	1.29395	0.371787	0.840146	0.272812	0.337296	0.305054	8.32572	3.05757	0.0899715	0.365487	0.146194	0.255841	1.98582	0.989735	0.760478
Mycth_2107828	Protein of unknown function DUF1399	64.0203	62.7021	63.3612	97.9017	97.0249	97.4633	1.53822	0.621259	0.000298484	59.0089	61.6989	60.3539	75.5503	67.4612	71.5058	1.18478	0.244613	0.00065489	176.88	273.896	225.388	2.31254	1.20948	0.193681	66.7362	95.0372	80.8867	1.13119	0.177843	0.805941
Mycth_2107928		3.44573	3.25739	3.35156	3.58656	3.42663	3.50659	1.04626	0.0652392	0.913876	3.3634	2.57274	2.96807	1.94307	2.35058	2.14682	0.723306	-0.467322	0.841651	2.55056	2.68626	2.61841	0.746709	-0.421382	0.408698	0.949162	2.42985	1.68951	0.78698	-0.345601	0.514193
Mycth_2107938	WD40 repeat	38.054	29.8044	33.9292	30.1021	28.0965	29.0993	0.857646	-0.221545	0.822283	40.0844	40.6961	40.3902	34.0152	38.7609	36.388	0.900912	-0.150542	0.63395	33.1891	21.8811	27.5351	0.946245	-0.0797139	0.410782	46.3789	44.0652	45.2221	1.24277	0.313563	0.991298
Mycth_2107968	Hypothetical protein	69.9699	69.928	69.949	58.0837	67.9197	63.0017	0.900681	-0.150913	0.982754	80.8103	65.8008	73.3055	74.1562	73.0359	73.596	1.00396	0.00570582	0.202738	88.802	91.0536	89.9278	1.42739	0.513377	0.322261	66.4907	80.1891	73.3399	0.99652	-0.0050298	0.253544
Mycth_2107979	D111/G-patch	8.39172	5.95273	7.17223	6.96334	8.18747	7.57541	1.05621	0.0789018	0.793608	13.5433	7.41362	10.4785	6.625	6.98962	6.80731	0.649647	-0.622272	0.479438	16.7555	18.668	17.7117	2.33806	1.22531	0.00242052	21.7005	12.4954	17.0979	2.5117	1.32867	0.0315742
Mycth_2108128		10.3527	9.60055	9.97662	14.7491	13.9439	14.3465	1.43801	0.524074	0.0601582	19.4723	12.7273	16.0998	14.7943	15.648	15.2211	0.945424	-0.0809666	0.605925	9.83676	5.49246	7.66461	0.53425	-0.904413	0.00153924	15.4952	13.3314	14.4133	0.946923	-0.0786803	0.24877
Mycth_2108150		0.378508	0.207766	0.293137	0.268622	0.193582	0.231102	0.788375	-0.343045	0.987395	0.782395	0.231228	0.506811	0.213443	0.211261	0.212352	0.418996	-1.25499	0.530208	0.980611	0.1732	0.576905	2.49633	1.31981	0.570688	1.736	0.250233	0.993115	4.67674	2.2255	0.482816
Mycth_2108166		0.0614551	0.0337332	0.0475942	0.174455	0.251442	0.212949	4.47426	2.16165	0.377712	0.0952732	0.112627	0.10395	0.415859	0.205804	0.310832	2.99019	1.58024	0.223885	0.272938	0.0749893	0.173963	0.816926	-0.291723	0.877607	0.152356	0.0650053	0.108681	0.349645	-1.51604	0.295675
Mycth_2108176	Fungal specific transcription factor	2.34368	1.48138	1.91253	0.967725	0.762771	0.865248	0.45241	-1.1443	0.103715	4.3674	3.03702	3.70221	0.600735	0.673872	0.637304	0.172141	-2.53833	1.9655e-07	1.71729	0.953276	1.33528	1.54324	0.625959	0.585437	0.880353	0.300493	0.590423	0.92644	-0.110231	0.760723
Mycth_2108207		4.75838	8.0534	6.40589	4.50261	4.56301	4.53281	0.7076	-0.498994	0.80781	4.20072	5.08701	4.64386	4.13673	4.97972	4.55822	0.981558	-0.026854	0.720134	4.69626	5.80632	5.25129	1.15851	0.212266	1	5.01361	5.34784	5.18073	1.13657	0.184684	0.883331
Mycth_2108297		1.69366	3.30547	2.49957	1.17526	0.673709	0.924484	0.369857	-1.43496	0.423983	2.23668	2.18425	2.21047	0.955066	1.89061	1.42284	0.643682	-0.635581	0.745185	4.27174	4.36294	4.31734	4.67	2.22342	0.00569764	4.10553	4.67781	4.39167	3.08656	1.626	0.0926228
Mycth_2108373		0	0	0	0	0	0	#DIV/0!	#DIV/0!	NA	0.103691	0	0.0518455	0	0	0	0	#NUM!	1	0.198035	0	0.0990175	#DIV/0!	#DIV/0!	0.904521	0.0994905	0	0.0497453	#DIV/0!	#DIV/0!	1
Mycth_2108406	Cytochrome P450, E-class, group IV	1.76637	2.35468	2.06052	1.64755	1.03244	1.33999	0.650316	-0.620787	0.660167	1.17359	0.924911	1.04925	1.92099	1.69009	1.80554	1.72078	0.783066	0.17462	0.373566	0.615821	0.494694	0.369177	-1.43762	0.103635	0.625584	1.00093	0.813259	0.450425	-1.15064	0.0926029
Mycth_2108417		2.38867	0.946949	1.66781	1.13014	1.22165	1.17589	0.705052	-0.504197	0.796539	1.98872	2.5131	2.25091	1.34699	1.33322	1.3401	0.595359	-0.748167	0.568788	0.9168	0.566752	0.741776	0.630819	-0.664702	0.466984	1.84236	2.59684	2.2196	1.65629	0.727959	0.71283
Mycth_2108494	Hypothetical protein	3.19398	1.37752	2.28575	0.90669	1.40016	1.15342	0.504615	-0.986746	0.529775	4.24423	2.7874	3.51581	0.514602	1.40069	0.957645	0.272382	-1.8763	0.0494373	1.80131	0.974348	1.38783	1.20322	0.266906	1	4.75101	2.29255	3.52178	3.67754	1.87874	0.119333
Mycth_2108524		0.479124	0.399752	0.439438	0.435235	0.274445	0.35484	0.807487	-0.30849	0.93007	0.732877	0.585386	0.659132	0.172916	0.42787	0.300393	0.45574	-1.13372	0.253361	0.567442	0.514484	0.540963	1.52453	0.60836	0.681231	0.551148	0.48653	0.518839	1.7272	0.788436	0.702973
Mycth_2108584		73.0941	114.892	93.993	73.7761	77.9204	75.8482	0.806956	-0.309438	0.909715	88.9323	101.615	95.2734	81.5088	82.5117	82.0103	0.860788	-0.216269	0.884964	23.6407	39.6406	31.6407	0.417158	-1.26133	5.87616e-07	54.4397	76.8816	65.6607	0.80064	-0.320775	0.0631261
Mycth_2108644		3.465	5.52183	4.49341	0.126919	0.342991	0.234955	0.0522888	-4.25735	0.00233683	22.8732	18.5727	20.723	0.882422	0.124771	0.503597	0.0243014	-5.36282	1.37922e-28	2.42693	1.22751	1.82722	7.77688	2.95919	0.0554887	1.88431	1.06408	1.4742	2.92733	1.54959	0.477793
Mycth_2108695		0.112529	0.988292	0.55041	0.191665	0.920823	0.556244	1.0106	0.0152101	0.99094	0.755963	0.687434	0.721698	0.31728	0.376844	0.347062	0.480896	-1.0562	0.597635	1.1106	1.30446	1.20753	2.17087	1.11827	0.450963	0.83693	0.23806	0.537495	1.5487	0.631059	0.930767
Mycth_2108717	Hypothetical protein	1.03017	2.07337	1.55177	0.974792	0.878104	0.926448	0.597027	-0.744133	0.758479	0.975978	1.15375	1.06487	1.16183	0.574978	0.868406	0.815507	-0.294231	1	0.423632	1.67605	1.04984	1.13319	0.180389	0.997637	0.595917	1.72532	1.16062	1.33649	0.418453	1
Mycth_2108831		13.0924	8.34906	10.7207	7.10528	6.89287	6.99907	0.652853	-0.61517	0.329716	15.7203	9.76235	12.7413	8.46862	9.02682	8.74772	0.686564	-0.542534	0.448925	14.7267	10.1023	12.4145	1.77374	0.826793	0.145728	12.4104	10.3866	11.3985	1.30303	0.381865	0.953043
Mycth_2108940		0	0.351604	0.175802	0.181836	0	0.0909181	0.517162	-0.951311	0.977742	0.24826	0.293481	0.270871	0.0903028	0.0893796	0.0898412	0.331676	-1.59216	0.787088	0.158047	0	0.0790236	0.869174	-0.202284	1	0.158802	0	0.0794011	0.883794	-0.178218	1
Mycth_2109000	Cytochrome P450	2.68364	2.55621	2.61992	3.36095	3.18906	3.27501	1.25004	0.321973	0.48648	3.79332	2.74843	3.27088	6.18681	5.5068	5.8468	1.78753	0.837971	0.000471843	2.0254	1.4447	1.73505	0.529785	-0.91652	0.0252175	4.30497	3.54833	3.92665	0.671589	-0.574349	0.0196576
Mycth_2109027	Major facilitator superfamily	20.9835	16.5221	18.7528	0.83856	0.937719	0.888139	0.0473603	-4.40018	1.28e-55	33.241	33.6023	33.4216	1.26369	1.64874	1.45621	0.0435709	-4.52049	2.7628e-65	3.84533	1.95763	2.90148	3.26692	1.70793	0.0169732	2.65156	1.7778	2.21468	1.52085	0.604879	0.663728
Mycth_2109081	NAD(P)-binding	0.141739	0.155603	0.148671	0.241417	0.362452	0.301934	2.03088	1.02211	0.810265	0	0	0	0.159855	0	0.0799275	#DIV/0!	#DIV/0!	0.818527	0.349722	0.605339	0.47753	1.58157	0.661359	0.911386	0.140557	0	0.0702784	0.879277	-0.185611	1
Mycth_2109123		3.06791	2.64628	2.85709	0.746485	1.56903	1.15776	0.405223	-1.30321	0.261749	3.73697	2.5435	3.14024	2.96573	0.733853	1.84979	0.589062	-0.763509	0.681995	0.973238	2.13917	1.5562	1.34415	0.426695	0.972961	0.434616	2.31795	1.37628	0.744021	-0.426586	0.762274
Mycth_2109142	Glycoside Hydrolase Family 35 protein	0.854069	0.416716	0.635392	0.754283	0.1456	0.449942	0.708132	-0.497909	0.898567	0.343273	0.463773	0.403523	0.428102	0.476691	0.452396	1.12112	0.164937	0.817628	2.29461	1.44744	1.87103	4.15838	2.05602	0.0147949	1.27042	0.451703	0.86106	1.90333	0.928527	0.686534
Mycth_2109153	Protein kinase, core	2.41282	2.51962	2.46622	2.53928	1.80585	2.17257	0.88093	-0.1829	0.981	3.89262	2.94795	3.42029	2.58847	2.562	2.57523	0.75293	-0.409413	0.833299	3.89142	2.58514	3.23828	1.49053	0.575828	0.560927	4.14345	2.48995	3.3167	1.28792	0.365045	0.991774
Mycth_2109166		15.1547	6.84544	11.0001	13.8023	11.6259	12.7141	1.15582	0.208922	0.749822	13.868	10.8009	12.3345	9.88109	9.16331	9.5222	0.772	-0.373326	0.780271	11.7629	11.365	11.5639	0.909535	-0.136799	0.424961	17.533	13.4419	15.4874	1.62646	0.701732	0.359472
Mycth_2109169		0	0	0	0	0.111706	0.0558532	#DIV/0!	#DIV/0!	0.907712	0	0	0	0	0	0	#DIV/0!	#DIV/0!	NA	0.377241	0.333149	0.355195	6.35944	2.6689	0.376828	0.162447	0.0577588	0.110103	#DIV/0!	#DIV/0!	0.757097
Mycth_2109170		0.0997266	0	0.0498633	0.113239	0	0.0566196	1.1355	0.183324	1	0	0	0	0	0	0	#DIV/0!	#DIV/0!	NA	0.0984246	0	0.0492123	0.869174	-0.202284	1	0	0	0	#DIV/0!	#DIV/0!	NA
Mycth_2109230		0.524546	0.863782	0.694164	1.11679	0.469475	0.793132	1.14257	0.192284	0.932922	1.08426	1.28177	1.18302	0.813436	0.585542	0.699489	0.591276	-0.758096	0.707236	3.23561	1.28013	2.25787	2.84678	1.50933	0.214078	2.40579	2.70488	2.55534	3.65315	1.86914	0.0732967
Mycth_2109239		6.13581	8.08318	7.1095	13.6358	11.1177	12.3768	1.74088	0.799814	0.0176635	5.2544	5.56894	5.41167	8.99606	7.92562	8.46084	1.56344	0.644727	0.0173898	1.38416	2.03221	1.70819	0.138016	-2.8571	4.57118e-12	1.39077	2.68882	2.0398	0.241087	-2.05237	1.08372e-06
Mycth_2109422	Heterokaryon incompatibility	0.979667	0.860395	0.920031	0.278102	0.450932	0.364517	0.396201	-1.33569	0.361551	0.961886	0.299236	0.630561	0.607684	0.492113	0.549899	0.872079	-0.197469	1	1.06356	1.79313	1.42835	3.91846	1.97029	0.102701	0.582897	0.051813	0.317355	0.577116	-0.793068	0.505436
Mycth_2109468		13.5096	8.23029	10.87	11.3409	10.1903	10.7656	0.990395	-0.0139239	0.903667	6.37026	5.93228	6.15127	2.35496	2.38706	2.37101	0.385451	-1.37538	3.64554e-05	4.34511	1.99537	3.17024	0.29448	-1.76376	4.21649e-11	4.04154	2.71431	3.37793	1.42468	0.510636	0.740038
Mycth_2109594		22.5516	20.0218	21.2867	23.9952	23.4583	23.7268	1.11463	0.156563	0.479555	30.87	30.422	30.646	25.6803	28.2217	26.951	0.87943	-0.185359	0.776506	15.4669	13.2593	14.3631	0.605354	-0.724149	0.00129919	18.7355	19.6957	19.2156	0.712984	-0.488058	0.00193066
Mycth_2109614		16.6194	12.8022	14.7108	16.9683	14.4996	15.734	1.06955	0.0970039	0.642705	15.7332	16.8074	16.2703	13.8214	13.2904	13.5559	0.833169	-0.263318	1	17.0572	12.27	14.6636	0.931969	-0.101646	0.390639	10.2832	13.3324	11.8078	0.871042	-0.199185	0.0878229
Mycth_2109689	Hypothetical protein	2.86338	2.951	2.90719	1.65886	0.836818	1.24784	0.429224	-1.2202	0.0901314	4.52966	4.42659	4.47812	1.44991	1.2394	1.34466	0.300272	-1.73566	0.00240441	5.47897	2.4957	3.98733	3.1954	1.67599	0.0781565	1.97026	2.16342	2.06684	1.53708	0.620191	0.795406
Mycth_2109705	Heat shock protein DnaJ, N-terminal	2.08179	2.07766	2.07973	1.07449	1.16149	1.11799	0.537566	-0.895487	0.332041	3.81418	2.83254	3.32336	0.74705	0.845043	0.796047	0.239531	-2.06172	0.000503224	5.37001	3.17533	4.27267	3.82175	1.93423	0.000679317	2.81513	2.2521	2.53361	3.18275	1.67027	0.0601914
Mycth_2109793	EAP30	44.7901	28.4639	36.627	28.9395	27.3596	28.1496	0.768546	-0.379796	0.461995	57.1149	35.532	46.3234	28.5302	26.4076	27.4689	0.592981	-0.753943	0.169894	47.5674	29.3285	38.448	1.36585	0.449795	0.411013	70.6285	58.0541	64.3413	2.34233	1.22795	0.0001454
Mycth_2109943		1.74734	1.49864	1.62299	0.930047	1.45218	1.19112	0.733902	-0.446341	0.833295	1.35444	2.20159	1.77802	1.04692	1.03622	1.04157	0.585804	-0.771511	0.570043	2.85625	2.99834	2.9273	2.45761	1.29726	0.101212	2.22011	2.6569	2.43851	2.34119	1.22724	0.257571
Mycth_2109950		17.6576	15.3757	16.5166	15.3566	15.0649	15.2107	0.920935	-0.118829	1	25.1347	18.9261	22.0304	13.8044	13.3944	13.5994	0.617301	-0.695953	0.0334312	16.7142	13.3685	15.0413	0.988862	-0.0161582	0.559641	21.5695	20.4605	21.015	1.54529	0.627879	0.330464
Mycth_2109970	Delta 1-pyrroline-5-carboxylate reductase	21.958	20.6776	21.3178	23.6387	20.8377	22.2382	1.04318	0.0609823	0.713287	21.9769	20.8931	21.435	24.6527	22.7407	23.6967	1.10551	0.144717	0.0526736	86.8808	78.7482	82.8145	3.72397	1.89684	9.36115e-13	109.071	77.9108	93.4907	3.94531	1.98014	3.86872e-14
Mycth_2110132		0.673521	0.537747	0.605634	0.347628	0.501036	0.424332	0.700641	-0.513253	0.922502	1.26564	1.04733	1.15648	0.41433	0.478444	0.446387	0.385987	-1.37338	0.317864	0.604298	0.896563	0.750431	1.7685	0.822526	0.744624	1.6394	1.16579	1.4026	3.14211	1.65173	0.26482
Mycth_2110233	Lipocalin	4.86144	3.23661	4.04902	3.98875	3.30438	3.64657	0.900605	-0.151034	0.973529	6.67762	4.3685	5.52306	3.99713	3.67618	3.83665	0.694661	-0.52562	0.418134	4.55033	2.1432	3.34676	0.917785	-0.123773	0.642082	4.78978	4.71099	4.75038	1.23816	0.308196	0.999297
Mycth_2110320		1.26033	1.08712	1.17372	0.71555	0.644576	0.680063	0.579406	-0.787354	0.758234	1.48867	2.0898	1.78923	0.812237	1.10541	0.958822	0.535885	-0.900005	0.588491	1.51042	0.878794	1.19461	1.75661	0.812795	0.689909	1.87472	0.571344	1.22303	1.27556	0.351129	1
Mycth_2110369	Hypothetical protein	0	0.093761	0.0468805	0.484896	0.0873601	0.286128	6.10335	2.6096	0.632915	0.617892	0.104349	0.36112	0.0963229	0.381353	0.238838	0.66138	-0.596448	0.963593	0.674335	0.312648	0.493491	1.72472	0.786362	0.831407	0.677556	0.271022	0.474289	1.98582	0.989735	0.878513
Mycth_2110542	UDP-glucose/GDP-mannose dehydrogenase, C-terminal	0.470794	0.387634	0.429214	0.0668232	0.0601951	0.0635092	0.147966	-2.75666	0.330204	0.669045	0.719012	0.694028	0	0.131385	0.0656924	0.0946538	-3.4012	0.0779055	0.116162	0	0.058081	0.914529	-0.128899	1	0.466867	0	0.233434	3.55343	1.82921	0.810665
Mycth_2110543		0.367375	0.537747	0.452561	0.139051	0	0.0695256	0.153627	-2.7025	0.635976	1.01251	0.149618	0.581065	0.13811	0.136698	0.137404	0.23647	-2.08027	0.561398	0	0	0	0	#NUM!	1	0	0.388598	0.194299	1.41407	0.499852	1
Mycth_2110559	SANT, DNA-binding	2.58168	1.61161	2.09664	1.69566	1.08735	1.39151	0.663685	-0.591429	0.427046	2.64207	2.47392	2.558	1.85546	1.58221	1.71883	0.671945	-0.573584	0.494562	5.32076	5.09597	5.20837	3.74296	1.90418	3.2688e-06	4.4426	3.48045	3.96152	2.30477	1.20462	0.0353262
Mycth_2110569		0	0	0	0	0	0	#DIV/0!	#DIV/0!	NA	0	0	0	0	0	0	#DIV/0!	#DIV/0!	NA	0	0	0	#DIV/0!	#DIV/0!	NA	0	0	0	#DIV/0!	#DIV/0!	NA
Mycth_2110630		0.188185	0.309888	0.249036	0	0	0	0	#NUM!	0.610426	0.388987	0.114961	0.251974	0.106118	0	0.0530592	0.210574	-2.2476	0.741862	0	0.459257	0.229628	#DIV/0!	#DIV/0!	0.664892	0.186615	0.298584	0.242599	4.57223	2.1929	0.828696
Mycth_2110635		0.421629	0.385726	0.403677	0.478759	0.646907	0.562833	1.39426	0.479504	0.852833	0.435764	0.343427	0.389596	0.237759	0.470657	0.354208	0.909169	-0.13738	1	0.34677	0.0857473	0.216259	0.384233	-1.37995	0.440929	0.278741	0.222993	0.250867	0.708248	-0.497674	0.808575
Mycth_2110651	Alcohol dehydrogenase GroES-like	1.09508	1.00183	1.04845	0.673541	0.606734	0.640138	0.610553	-0.711811	0.676157	1.08464	1.17071	1.12767	0.463142	0.356539	0.40984	0.363439	-1.46021	0.205666	1.75627	0.723801	1.24004	1.93714	0.953929	0.404133	1.13119	0.530906	0.83105	2.02774	1.01987	0.631573
Mycth_2110653	Berberine/berberine-like	0.20031	0.219903	0.210107	0.0974792	0.204891	0.151185	0.719564	-0.474806	0.959803	0.443626	0.349623	0.396624	0.225912	0.0958296	0.160871	0.4056	-1.30187	0.446787	0.819021	0.279342	0.549182	3.63251	1.86097	0.21641	0.198639	0.24215	0.220395	1.37001	0.454187	1
Mycth_2110669	Fungal transcriptional regulatory protein, N-terminal	0.0905127	0	0.0452564	0.102777	0.277748	0.190263	4.20411	2.0718	0.829275	0	0	0	0.204163	0.101038	0.1526	#DIV/0!	#DIV/0!	0.643827	0	0.110446	0.0552231	0.290247	-1.78465	0.750635	0.269273	0.0957415	0.182507	1.19598	0.258197	1
Mycth_2110682	Beta-lactamase-like	0.103765	0.0569576	0.0803615	0.0589127	0	0.0294563	0.366548	-1.44793	0.959164	0	0.126779	0.0633895	0.0585139	0	0.029257	0.461543	-1.11546	1	0.256027	0.126617	0.191322	6.49511	2.69935	0.567682	0.463049	0.274399	0.368724	12.603	3.65569	0.302009
Mycth_2110715	Hypothetical protein	0.157116	0.517455	0.337285	0	0.0803548	0.0401774	0.11912	-3.06951	0.549157	0.324768	0.383925	0.354347	0	0.350773	0.175386	0.494957	-1.01462	0.864579	0.232598	0.095859	0.164228	4.08758	2.03125	0.836454	0.233709	0.166193	0.199951	1.14006	0.189109	1
Mycth_2110729	Glucose-methanol-choline oxidoreductase, N-terminal	0.358158	1.27787	0.818015	0.305016	0.274762	0.289889	0.354381	-1.49663	0.676177	1.66574	1.03928	1.35251	2.37312	2.54876	2.46094	1.81953	0.863566	0.0333809	2.07671	2.18517	2.13094	7.35089	2.87792	0.000466917	2.97455	3.45699	3.21577	1.30673	0.385956	0.970891
Mycth_2110731	Aromatic-ring hydroxylase	0.179079	0.0982978	0.138688	0	0.0915872	0.0457936	0.330191	-1.59863	0.959448	0.185083	0	0.0925414	0	0.199903	0.0999513	1.08007	0.111127	1	0	0.218517	0.109259	2.38589	1.25453	1	0.0887926	0.378848	0.23382	2.33934	1.2261	0.945444
Mycth_2110752	Oligopeptide transporter OPT superfamily	0.219136	0.841998	0.530567	0.248828	0.336222	0.292525	0.551344	-0.858976	0.913876	0.339724	0.267737	0.303731	0.123572	0.122309	0.122941	0.404768	-1.30483	0.883322	0.540688	0.267396	0.404042	1.38122	0.465945	0.999268	0	0.579488	0.289744	2.35678	1.23682	0.942452
Mycth_2110837	Calcium-binding EF-hand	88.6369	93.8711	91.254	86.432	87.3484	86.8902	0.95218	-0.0706944	0.941306	83.4065	74.8371	79.1218	98.453	101.564	100.009	1.26398	0.337976	0.000456335	82.6258	72.5595	77.5926	0.892997	-0.163273	0.207224	58.5245	51.7852	55.1548	0.551501	-0.858563	2.86749e-07
Mycth_2110839		4.02803	2.89133	3.45968	6.24502	5.70482	5.97492	1.72702	0.788281	0.081127	4.72348	3.97496	4.34922	5.24176	5.01523	5.1285	1.17917	0.237778	0.317514	4.89285	3.21373	4.05329	0.678384	-0.559826	0.154343	4.68577	2.94973	3.81775	0.744419	-0.425813	0.188266
Mycth_2110896	Carboxylesterase, type B	0.0630846	0	0.0315423	0	0	0	0	#NUM!	1	0	0	0	0	0	0	#DIV/0!	#DIV/0!	NA	0	0.153955	0.0769777	#DIV/0!	#DIV/0!	0.871619	0	0	0	#DIV/0!	#DIV/0!	NA
Mycth_2110911	NACHT nucleoside triphosphatase	19.4015	13.634	16.5177	0.346593	0.214648	0.28062	0.016989	-5.87925	9.88e-69	75.3573	54.2847	64.821	0.193639	0.170364	0.182001	0.00280775	-8.47637	7.90912e-82	0.225937	0.30262	0.264279	0.941766	-0.0865597	0.856854	0.870229	0.968601	0.919415	5.05169	2.33677	0.0103655
Mycth_2110936		0.501637	1.21155	0.856594	0.455686	0.205244	0.330465	0.385789	-1.37411	0.631701	0.933218	0.367736	0.650477	0.678903	1.11994	0.89942	1.38271	0.467496	0.702648	0.594105	0.734534	0.66432	2.01026	1.00738	0.764322	0.497453	0.530615	0.514034	0.571517	-0.807131	0.548599
Mycth_2110987	cutinase	14.07	16.6284	15.3492	12.0639	11.9687	12.0163	0.78286	-0.353174	0.720378	22.9255	23.4178	23.1717	10.2011	12.7412	11.4712	0.495051	-1.01435	0.00198313	36.8414	25.4902	31.1658	2.59363	1.37497	4.75642e-05	49.7598	29.2342	39.497	3.44316	1.78373	0.00255003
Mycth_2111026		2.85503	3.23877	3.0469	2.53947	3.60173	3.0706	1.00778	0.011179	0.903667	3.63926	2.67431	3.15678	3.38094	2.28403	2.83248	0.897268	-0.156388	0.911994	2.58294	2.03221	2.30758	0.751506	-0.412143	0.277368	3.39746	2.21464	2.80605	0.990667	-0.0135276	0.620625
Mycth_2111053		9.99261	7.51651	8.75456	3.36195	4.06953	3.71574	0.424435	-1.23639	0.0151981	10.9014	11.5306	11.216	2.81745	4.95759	3.88752	0.346606	-1.52863	0.000848602	3.56133	5.08053	4.32093	1.16287	0.217693	1	4.77112	5.3828	5.07696	1.30597	0.385116	0.982286
Mycth_2111103		0.73321	0.45996	0.596585	0.594684	0.428559	0.511622	0.857584	-0.22165	1	0.757792	0.383925	0.570858	0.708791	0	0.354396	0.620812	-0.687772	0.92277	0.516884	0.255624	0.386254	0.75496	-0.405528	0.883694	0.519353	0.997156	0.758255	2.13957	1.09732	0.805422
Mycth_2111125	TonB box, conserved site	19.0827	9.64155	14.3621	12.6609	12.3987	12.5298	0.87242	-0.196905	0.937284	25.223	15.1807	20.2018	10.156	9.01311	9.58458	0.474441	-1.0757	0.0500134	48.5718	27.162	37.8669	3.02215	1.59557	0.00391452	34.6964	12.8431	23.7698	2.48	1.31034	0.350254
Mycth_2111167	Ubiquitin-conjugating enzyme, E2	232.984	205.883	219.433	210.636	215.749	213.193	0.971561	-0.041624	0.887258	209.848	209.325	209.587	219.701	223.586	221.643	1.05753	0.0806929	0.0272858	135.779	123.878	129.829	0.608975	-0.715546	9.16984e-05	180.879	199.965	190.422	0.859138	-0.219039	0.0130032
Mycth_2111197		0.60719	0.666582	0.636886	0.590968	0.709801	0.650384	1.02119	0.0302577	1	0.448247	0.317938	0.383093	0.391312	0.193656	0.292484	0.763481	-0.389337	1	1.36974	1.05844	1.21409	1.86673	0.900514	0.645857	1.20425	1.19278	1.19851	4.09771	2.03482	0.309627
Mycth_2111202	Terpenoid synthase	22.0963	17.5109	19.8036	10.9204	10.4131	10.6667	0.538627	-0.892642	0.00381855	26.6676	22.3542	24.5109	9.2063	9.26929	9.2378	0.376886	-1.4078	1.17899e-08	17.224	14.6548	15.9394	1.49431	0.579479	0.2622	13.1193	11.8105	12.4649	1.34933	0.432248	0.826096
Mycth_2111272	Fungal lignin peroxidase	0.917595	0.503675	0.710635	0.677252	0.750864	0.714058	1.00482	0.00693311	0.989305	1.46995	0.728717	1.09934	0.362206	0.717006	0.539606	0.490847	-1.02665	0.411517	2.39988	1.84746	2.12367	2.97409	1.57245	0.0511003	2.13836	1.06766	1.60301	2.97071	1.57081	0.172647
Mycth_2111282	Major facilitator superfamily	33.0438	18.6105	25.8272	14.8506	15.4435	15.147	0.586476	-0.769856	0.184462	23.0301	16.3836	19.7069	11.688	10.9772	11.3326	0.575058	-0.79822	0.00880349	7.18911	5.81786	6.50348	0.429358	-1.21975	4.90245e-07	16.4826	12.6782	14.5804	1.28659	0.363554	0.942815
Mycth_2111310	Region of unknown function DUF1744	0	0.10692	0.0534602	0.774133	0	0.387066	7.24027	2.85604	0.771844	0	0.118994	0.0594972	0	0.326157	0.163079	2.74095	1.45467	0.838919	0.480611	0.118843	0.299727	0.774356	-0.368932	0.972497	0.289744	0	0.144872	0.888358	-0.170786	1
Mycth_2111332		0.537237	0.0982978	0.317767	0.101672	0.183174	0.142423	0.448199	-1.15779	0.884997	0.462707	0.54699	0.504849	0.100984	0.0999513	0.100468	0.199005	-2.32912	0.470723	0.706964	0.218517	0.462741	3.24905	1.70002	0.624368	0.976719	0.094712	0.535715	5.33222	2.41474	0.586086
Mycth_2111340		1.33235	1.95023	1.64129	0.588341	1.43853	1.01344	0.617464	-0.695574	0.76863	1.53002	2.62264	2.07633	1.16872	1.32202	1.24537	0.599795	-0.737458	0.64201	1.16885	0.361282	0.765064	0.754922	-0.405601	0.72023	1.39464	0.861248	1.12794	0.905708	-0.142883	0.743454
Mycth_2111341		0.390947	0.34335	0.367149	0.177568	0.239933	0.20875	0.568572	-0.814586	0.917972	0.808108	0.573184	0.690646	0.088183	0.174563	0.131373	0.190218	-2.39428	0.282489	0.617349	0.286227	0.451788	2.16425	1.11387	0.750635	0.0775372	0.248119	0.162828	1.23943	0.30968	1
Mycth_2111394		1.22234	0.838688	1.03051	1.38796	1.56286	1.47541	1.43173	0.517757	0.814163	1.42123	1.30675	1.36399	1.03393	0.852796	0.94336	0.691617	-0.531955	0.938123	1.35718	0.559324	0.95825	0.649479	-0.622644	0.666565	0.303035	0	0.151518	0.160615	-2.63832	0.280002
Mycth_2111445		0.414877	0.71572	0.565298	0.605689	0.666859	0.636274	1.12555	0.170636	0.932922	0.673807	1.23102	0.952413	1.40371	0.6616	1.03265	1.08425	0.116698	0.7644	2.45676	2.0973	2.27703	3.57869	1.83943	0.0383442	2.99746	5.39151	4.19448	4.06185	2.02214	0.133262
Mycth_2111512		2.51251	2.28542	2.39897	3.99413	3.15739	3.57576	1.49054	0.575836	0.346391	3.85802	2.5435	3.20076	4.3719	3.28547	3.82868	1.19618	0.258434	0.370434	5.17196	2.62786	3.89991	1.09065	0.125191	0.997396	4.9831	3.34105	4.16207	1.08708	0.120454	0.808106
Mycth_2111519	Zinc finger, C2H2-type	9.36807	7.66289	8.51548	16.0604	16.5968	16.3286	1.91752	0.939243	0.000270512	4.99928	5.61067	5.30497	17.4709	18.6593	18.0651	3.40532	1.76779	6.17043e-17	6.40556	4.63224	5.5189	0.33799	-1.56495	7.08803e-08	3.70383	2.33159	3.01771	0.167046	-2.58168	4.72316e-19
Mycth_2111528	Protein synthesis factor, GTP-binding	22.9152	14.3713	18.6433	18.8548	19.7183	19.2865	1.0345	0.0489404	0.720629	29.6682	23.7646	26.7164	19.5644	18.9224	19.2434	0.720285	-0.473359	0.258379	55.27	44.4791	49.8746	2.58598	1.37071	6.15581e-07	55.804	35.2852	45.5446	2.36676	1.24291	0.00635089
Mycth_2111533	Chloroperoxidase	0	0.279136	0.139568	0.288717	0.13004	0.209378	1.50019	0.585146	1	0.525579	0.155328	0.340454	0.143381	0.567663	0.355522	1.04426	0.0624812	1	0.627363	1.08591	0.856639	4.09134	2.03257	0.472275	1.26072	0.806859	1.03379	2.90781	1.53993	0.634415
Mycth_2111553		0	0.533822	0.266911	0.138036	0	0.0690181	0.258581	-1.95131	0.903341	0	0.148526	0.0742629	0	0.1357	0.0678502	0.913649	-0.130289	1	0.119977	0.44501	0.282494	4.09303	2.03317	0.816139	0.964404	1.67163	1.31802	19.4254	4.27987	0.107677
Mycth_2111556	Protein of unknown function DUF895, eukaryotic	0	0.111484	0.0557421	0.461243	0.242371	0.351807	6.31134	2.65795	0.12294	0	0	0	0.0381768	0	0.0190884	#DIV/0!	#DIV/0!	1	0.133633	1.52829	0.830961	2.36198	1.24	0.767543	0.234976	0.286446	0.260711	13.6581	3.77168	0.255991
Mycth_2111617	Heterokaryon incompatibility	38.8601	39.1681	39.0141	33.0557	33.3087	33.1822	0.850519	-0.233585	0.826873	51.918	43.5911	47.7545	35.8862	38.3155	37.1008	0.776907	-0.364186	0.658434	54.322	42.0486	48.1853	1.45214	0.538182	0.24781	62.235	63.3762	62.8056	1.69283	0.759441	0.0979727
Mycth_2111641		0	0	0	0	0	0	#DIV/0!	#DIV/0!	NA	0	0	0	0	0.244618	0.122309	#DIV/0!	#DIV/0!	0.81776	0	0	0	#DIV/0!	#DIV/0!	NA	0	0	0	0	#NUM!	0.840018
Mycth_2111646		0.429789	0.47183	0.45081	0.97605	0.659428	0.817739	1.81393	0.859122	0.73938	1.1105	0.787666	0.949081	1.93889	1.91907	1.92898	2.03247	1.02323	0.213293	0.742312	0	0.371156	0.453881	-1.13961	0.569002	1.06551	0.454618	0.760064	0.394025	-1.34364	0.16183
Mycth_2111679		2.22058	2.07212	2.14635	0.504292	0.908545	0.706419	0.329126	-1.60329	0.23595	2.52453	2.0348	2.27967	1.37742	0.743638	1.06053	0.465212	-1.10404	0.423974	1.53411	1.76125	1.64768	2.33244	1.22184	0.487849	1.87175	1.87909	1.87542	1.76838	0.822429	0.76674
Mycth_2111801		7.19632	3.95012	5.57322	4.66937	2.41858	3.54398	0.635894	-0.653141	0.58181	7.33133	5.27542	6.30337	3.47833	4.01656	3.74745	0.594514	-0.750217	0.377862	1.52194	1.50534	1.51364	0.427102	-1.22735	0.113102	4.48567	2.39235	3.43901	0.917695	-0.123913	0.602176
Mycth_2111803	Cytochrome P450	0.315082	0.0494146	0.182248	0.255554	0.184165	0.219859	1.20637	0.270673	0.981	0.232604	0.164984	0.198794	0.10153	0.150737	0.126134	0.634493	-0.656323	0.960294	0.266545	0.164774	0.215659	0.980897	-0.027826	1	0.178545	0.666568	0.422556	3.35007	1.74419	0.57071
Mycth_2111820		3.70096	4.74014	4.22055	0	0	0	0	#NUM!	2.94e-06	2.86878	1.31885	2.09382	0	0	0	0	#NUM!	0.00571457	0.152194	0.376335	0.264264	#DIV/0!	#DIV/0!	0.746506	0.152921	0	0.0764603	#DIV/0!	#DIV/0!	1
Mycth_2111826		0.317226	0	0.158613	0	0	0	0	#NUM!	0.937818	0.16393	0	0.0819652	0	0	0	0	#NUM!	1	0.156542	0.193544	0.175043	#DIV/0!	#DIV/0!	0.886561	0.31458	0.671102	0.492841	#DIV/0!	#DIV/0!	0.549032
Mycth_2111918		376.639	684.737	530.688	657.449	690.68	674.065	1.27017	0.345023	0.612746	401.985	470.706	436.345	776.584	810.269	793.427	1.81835	0.862627	1.61694e-12	671.077	1234.16	952.62	1.41325	0.499014	0.800525	355.301	747.373	551.337	0.694881	-0.525163	0.137171
Mycth_2112012		0.586421	0.386269	0.486345	0.332939	0.359899	0.346419	0.712292	-0.48946	0.935808	1.09095	0.859776	0.975361	0.727509	0.196383	0.461946	0.473616	-1.07821	0.5029	2.43081	0.715567	1.57319	4.54129	2.1831	0.195241	1.62828	1.24059	1.43444	3.1052	1.63469	0.249096
Mycth_2112063		1.37261	0.301375	0.836993	1.45469	1.2168	1.33575	1.59589	0.674358	0.678456	0.851177	0.559012	0.705095	1.23844	0.51074	0.874589	1.24039	0.310789	0.759118	2.70938	2.7915	2.75044	2.0591	1.04202	0.356543	1.27042	0.387174	0.828796	0.94764	-0.0775885	0.874192
Mycth_2112071	ATPase, F1/V1/A1 complex, alpha/beta subunit, nucleotide-binding	11.3443	8.53225	9.93826	15.6221	15.7514	15.6868	1.57842	0.658482	0.00698408	13.371	9.73167	11.5513	13.7197	12.1784	12.9491	1.121	0.164789	0.107921	13.5783	13.607	13.5926	0.866505	-0.206721	0.208258	18.526	19.6079	19.0669	1.47245	0.558223	0.510833
Mycth_2112081		0.880108	1.04052	0.960313	0.307495	0.692489	0.499992	0.520655	-0.941599	0.682262	0.979584	0.909871	0.944728	0.534475	0.453438	0.493956	0.522856	-0.935515	0.643151	2.93994	2.3957	2.66782	5.33572	2.41568	0.00688879	4.4981	3.58058	4.03934	8.17752	3.03166	0.000267897
Mycth_2112126	Xylose isomerase	5.4091	1.87522	3.64216	4.20244	2.912	3.55722	0.976678	-0.0340446	1	5.88468	5.21744	5.55106	4.33453	4.44912	4.39182	0.791168	-0.337944	0.960151	4.91702	2.6054	3.76121	1.05735	0.0804472	0.980639	9.88102	3.91476	6.89789	1.57062	0.651335	0.748462
Mycth_2112160	Multicopper oxidase, copper-binding site	5.05463	4.48192	4.76827	2.94334	3.04911	2.99622	0.628367	-0.670322	0.390825	7.90311	3.72124	5.81217	2.92342	4.77433	3.84887	0.66221	-0.59464	0.704048	15.0938	6.32595	10.7099	3.57446	1.83773	0.0711256	15.4872	5.20953	10.3484	2.68868	1.4269	0.385657
Mycth_2112164		0	0	0	0	0.132056	0.066028	#DIV/0!	#DIV/0!	0.907712	0	0.0788683	0.0394342	0	0	0	0	#NUM!	1	0.063709	0.0787679	0.0712384	1.07891	0.109577	1	0.256053	0	0.128027	#DIV/0!	#DIV/0!	0.769705
Mycth_2112181	Tannase and feruloyl esterase	33.3743	24.2039	28.7891	24.7369	24.6307	24.6838	0.8574	-0.221959	0.80489	36.2551	26.1761	31.2156	22.5544	21.5187	22.0365	0.705946	-0.50237	0.196059	101.226	96.69	98.9581	4.00903	2.00325	4.94201e-16	99.5152	66.6685	83.0918	3.77064	1.91481	8.72723e-08
Mycth_2112226	Acyl-CoA N-acyltransferase	1.92725	1.47704	1.70215	31.5045	32.2107	31.8576	18.7161	4.22621	1.36e-63	2.66834	2.26583	2.46709	58.7275	55.6917	57.2096	23.1891	4.53538	1.23048e-140	2.22508	2.52917	2.37713	0.0746173	-3.74435	1.20475e-43	0.973617	0.961596	0.967606	0.0169134	-5.88569	1.57437e-108
Mycth_2112358	Colipase	0.482269	0.211777	0.347023	0.219046	0.263092	0.241069	0.694678	-0.525583	0.901105	0.465208	0.235691	0.35045	0.145042	0.251229	0.198136	0.565375	-0.822719	0.74895	0.888482	0.274623	0.581552	2.41239	1.27046	0.403339	1.24344	0.578145	0.910792	4.59681	2.20063	0.0795046
Mycth_2112409		0.282277	0.197201	0.239739	0.466218	0.472472	0.469345	1.95773	0.969182	0.404889	0.503916	0.407588	0.455752	0.173648	0.25781	0.215729	0.473348	-1.07903	0.486562	0.303918	0.250504	0.277211	0.590634	-0.759664	0.393626	0.127237	0.244296	0.185767	0.86111	-0.21573	0.814147
Mycth_2112425		1.81384	1.44819	1.63101	1.4979	1.68666	1.59228	0.976249	-0.0346783	0.997962	1.95986	3.12272	2.54129	2.32463	1.56458	1.94461	0.765204	-0.386084	0.954762	2.03427	2.11269	2.07348	1.30221	0.380965	0.910625	1.47167	0.959311	1.21549	0.625058	-0.677938	0.31773
Mycth_2112431		1.13787	1.81698	1.47743	2.23173	4.44397	3.33785	2.25923	1.17583	0.273867	1.28293	0.505541	0.894238	2.33329	4.61887	3.47608	3.8872	1.95873	0.0562284	0.918834	0.757346	0.83809	0.251087	-1.99374	0.0331836	0.923223	0.765932	0.844577	0.242968	-2.04116	0.0315884
Mycth_2112434	Glucose/ribitol dehydrogenase	0.0619121	0	0.030956	0.210903	0	0.105451	3.40649	1.76829	0.923923	0.191963	0.0756432	0.133803	0.13965	0.138223	0.138937	1.03836	0.0543132	1	0.305519	0.151094	0.228306	2.16504	1.11439	0.822367	0.613956	0.196466	0.405211	2.91652	1.54425	0.695279
Mycth_2112463	Cyclin-like F-box	28.1775	21.2126	24.6951	19.4437	19.5545	19.4991	0.789595	-0.340815	0.530212	30.6374	27.7636	29.2005	19.6758	20.3257	20.0007	0.684946	-0.545939	0.132095	20.1699	14.8122	17.4911	0.897021	-0.156787	0.245573	33.1762	24.9359	29.0561	1.45275	0.538786	0.458093
Mycth_2112475	Hypothetical protein	0.310329	0.283904	0.297116	0.117459	0.634853	0.376156	1.26602	0.340303	0.92042	0.534556	0.252771	0.393663	0.0583322	0.115472	0.086902	0.220752	-2.1795	0.376402	0.510463	0.757346	0.633904	1.68522	0.752933	0.804823	0.205161	0.109419	0.15729	1.80997	0.855963	0.982344
Mycth_2112484		23.3045	31.5833	27.4439	6.63197	7.06843	6.8502	0.249607	-2.00227	0.008701	41.5077	43.5222	42.5149	12.9133	15.3956	14.1545	0.332929	-1.58671	4.98837e-09	8.30406	10.0199	9.162	1.33748	0.419515	0.650027	7.16815	9.14464	8.1564	0.576242	-0.795253	0.000232192
Mycth_2112496	Cytochrome P450	4.38633	6.24495	5.31564	2.56816	2.17322	2.37069	0.445984	-1.16494	0.202985	8.57093	6.78268	7.6768	3.78751	4.51385	4.15068	0.540678	-0.887157	0.111883	12.2431	8.27938	10.2613	4.32839	2.11383	4.29115e-06	15.6319	9.71441	12.6731	3.05327	1.61035	0.00129802
Mycth_2112504		0.0376795	0	0.0188398	0.08557	0.0770825	0.0813262	4.31673	2.10994	0.827565	0.0778855	0.276218	0.177052	0	0	0	0	#NUM!	0.256701	0.14875	0.18391	0.16633	2.04522	1.03226	0.844783	0.261557	0.119569	0.190563	#DIV/0!	#DIV/0!	0.315393
Mycth_2112541	Protein of unknown function DUF1338	1.79673	1.21384	1.50528	1.60861	1.9792	1.7939	1.19174	0.253065	0.686233	1.49986	0.886533	1.1932	0.389688	0.84855	0.619119	0.518874	-0.946544	0.381172	0.818435	0.505945	0.66219	0.369134	-1.43778	0.00927208	0.719552	0.219292	0.469422	0.758209	-0.399332	0.619289
Mycth_2112630		4.87444	3.67898	4.27671	2.1909	2.90845	2.54968	0.596178	-0.746186	0.48455	5.24777	3.34998	4.29888	3.32138	3.17406	3.24772	0.755481	-0.404532	0.862204	3.40765	4.46095	3.9343	1.54306	0.625792	0.654729	5.74012	3.86702	4.80357	1.47906	0.564679	0.804578
Mycth_2112674	GCN5-related N-acetyltransferase	61.7087	54.1766	57.9427	40.8079	38.2844	39.5461	0.682505	-0.551089	0.127634	66.4954	47.8714	57.1834	34.7979	30.9197	32.8588	0.574621	-0.799316	0.00767442	59.7785	60.5385	60.1585	1.52122	0.605231	0.175806	84.3156	70.0021	77.1589	2.34819	1.23155	0.00020156
Mycth_2112679		4.28379	1.55161	2.9177	3.309	3.54714	3.42807	1.17492	0.232566	0.790375	4.02081	2.88397	3.45239	2.56356	2.06566	2.31461	0.670436	-0.576829	0.271712	4.74557	3.34257	4.04407	1.17969	0.238409	0.924876	2.45636	1.74161	2.09898	0.906842	-0.141076	0.246068
Mycth_2112701		7.48953	5.24701	6.36827	1.90229	2.9736	2.43795	0.382827	-1.38524	0.0012789	8.3008	5.17731	6.73905	2.05612	3.19016	2.62314	0.389245	-1.36125	0.0210266	4.81436	7.5757	6.19503	2.54109	1.34545	0.196468	12.3621	9.17305	10.7676	4.10484	2.03733	3.78341e-06
Mycth_2112712	TPP-binding enzymes, conserved site	1.07049	0.565	0.817745	0.864902	0.568543	0.716722	0.876462	-0.190236	0.962235	1.0851	1.2576	1.17135	0.441133	0.344702	0.392918	0.335439	-1.57588	0.0220297	1.13778	1.15552	1.14665	1.59986	0.677942	0.475301	2.38851	1.37186	1.88019	4.78519	2.25858	0.000594884
Mycth_2112717		1.11029	0.843849	0.977069	1.64865	1.3104	1.47952	1.51425	0.598601	0.65843	1.94195	1.87828	1.91011	1.63749	1.62075	1.62912	0.852892	-0.229565	1	1.60155	0.52108	1.06131	0.717333	-0.479285	0.623881	5.58984	3.61363	4.60173	2.82467	1.49808	0.099185
Mycth_2112769		0.156379	0	0.0781894	0	0.159955	0.0799776	1.02287	0.0326225	1	0	0.0955307	0.0477653	0.088183	0.0872815	0.0877322	1.83673	0.877143	0.982284	0.154337	0.0954089	0.124873	1.56135	0.642795	1	0.232612	0	0.116306	1.32569	0.406745	1
Mycth_2112775		4.47499	3.5959	4.03545	7.28151	7.17273	7.22712	1.79091	0.840692	0.00747157	6.19848	3.49468	4.84658	7.49238	7.20979	7.35108	1.51676	0.60099	0.00565195	20.8079	17.1696	18.9888	2.62744	1.39366	5.23407e-05	17.3847	11.419	14.4018	1.95914	0.970222	0.0480653
Mycth_2112795		1.70439	0.962284	1.33334	0.552952	0.498106	0.525529	0.394145	-1.3432	0.205611	1.7112	1.42793	1.56957	0.494289	0.380517	0.437403	0.278677	-1.84333	0.0486339	0.384489	0.41595	0.400219	0.761555	-0.39298	0.725614	2.65599	1.13322	1.89461	4.33149	2.11486	0.0807245
Mycth_2112801	Acyltransferase ChoActase/COT/CPT	0	0.138511	0.0692553	0	0.129055	0.0645274	0.931732	-0.102013	1	0.0651996	0.154152	0.109676	0	0.0704203	0.0352101	0.321039	-1.63918	0.938123	0.62261	0.307911	0.46526	7.21028	2.85006	0.294947	0.250234	0.133458	0.191846	5.4486	2.44588	0.760723
Mycth_2112885		3.26099	4.73067	3.99583	6.61222	4.52684	5.56953	1.39384	0.479062	0.491324	4.09253	2.98817	3.54035	7.35557	7.8004	7.57798	2.14046	1.09792	0.00453603	4.13796	4.40549	4.27173	0.766981	-0.382737	0.386209	9.12391	7.76108	8.4425	1.11408	0.155855	0.823659
Mycth_2112920		1.43263	1.14025	1.28644	1.01672	0.842602	0.92966	0.72266	-0.468612	0.773497	0.999447	1.09398	1.04671	1.05023	1.03949	1.04486	0.998231	-0.00255379	0.770681	4.34783	3.40887	3.87835	4.17179	2.06067	9.2449e-05	1.59827	0.909235	1.25375	1.19992	0.262938	0.992886
Mycth_2112936		0.920129	0.505066	0.712598	0	0.282352	0.141176	0.198114	-2.33559	0.404191	0.475489	0.11242	0.293954	0.830187	0.821699	0.825943	2.80977	1.49045	0.308484	1.81623	0.561384	1.18881	8.42076	3.07395	0.133593	1.82491	1.07061	1.44776	1.75286	0.809709	0.784209
Mycth_2112941		2.97731	2.4514	2.71436	2.4299	1.04686	1.73838	0.640438	-0.642869	0.644795	2.30785	3.18293	2.74539	2.30852	2.90808	2.6083	0.950066	-0.0739004	0.83982	5.2341	4.42772	4.83091	2.77897	1.47455	0.0477807	6.36628	7.67643	7.02136	2.69193	1.42864	0.0627016
Mycth_2112958		15.5441	13.5602	14.5521	26.3178	27.2564	26.7871	1.84077	0.880307	0.000138191	17.141	17.0415	17.0912	24.8092	24.8654	24.8373	1.45322	0.539252	0.00020168	32.3259	28.4509	30.3884	1.13444	0.181986	0.979953	42.3208	36.3339	39.3273	1.5834	0.663025	0.260125
Mycth_2112984		0.234568	0.0858375	0.160203	0	0.0799776	0.0399888	0.249613	-2.00223	0.892602	0.323243	0.286592	0.304918	0	0.261844	0.130922	0.429369	-1.21971	0.83406	0	0.190818	0.0954089	2.38589	1.25453	1	0.310149	0.0827062	0.196428	1.50034	0.585288	1
Mycth_2112989		0	0	0	0	0	0	#DIV/0!	#DIV/0!	NA	0	0	0	0	0	0	#DIV/0!	#DIV/0!	NA	0	0	0	#DIV/0!	#DIV/0!	NA	0	0	0	#DIV/0!	#DIV/0!	NA
Mycth_2112991	AAA ATPase, conserved site	0	0	0	0	0	0	#DIV/0!	#DIV/0!	NA	0.0340845	0.161173	0.0976285	0	0	0	0	#NUM!	0.488185	0.0650967	0	0.0325483	#DIV/0!	#DIV/0!	0.904521	0	0	0	#DIV/0!	#DIV/0!	NA
Mycth_2113028		2.46095	2.1362	2.29858	1.49468	2.34161	1.91815	0.834493	-0.261029	0.946213	2.89836	2.58721	2.74278	2.13003	1.72493	1.92748	0.702746	-0.508924	0.741862	2.03343	1.67605	1.85474	0.966945	-0.0484949	0.779813	3.74577	1.51344	2.6296	1.36427	0.448129	0.924494
Mycth_2113078		4.93294	5.3161	5.12452	10.7916	10.4156	10.6036	2.06918	1.04906	9.24e-05	6.26767	5.41877	5.84322	11.0758	11.5183	11.2971	1.93336	0.951113	1.03085e-06	2.81393	1.4358	2.12486	0.200391	-2.31911	2.58642e-12	3.72495	3.63818	3.68156	0.325886	-1.61756	1.72876e-09
Mycth_2113081		0.360744	0.198015	0.279379	0.546165	0.61499	0.580578	2.0781	1.05526	0.594019	0.434978	0.293834	0.364406	0.881511	0.469807	0.675659	1.85414	0.890749	0.417641	0.296695	0.660285	0.47849	0.824162	-0.279	0.772322	0.47698	0.699569	0.588275	0.870667	-0.199806	0.775343
Mycth_2113082	Protein kinase, core	0.532088	0.35048	0.441284	0.543766	0.544256	0.544011	1.23279	0.301928	0.903667	0.274963	0.520078	0.39752	0.780123	0.831544	0.805834	2.02715	1.01945	0.243296	0.420113	0.194781	0.307447	0.565148	-0.8233	0.558566	1.10806	0.393978	0.751021	0.93198	-0.10163	0.79545
Mycth_2113155		11.1776	10.6888	10.9332	10.2556	10.9091	10.5823	0.967909	-0.0470573	0.923129	13.1743	9.11748	11.1459	9.13864	8.43743	8.78804	0.788454	-0.342902	0.759118	12.7386	8.28517	10.5119	0.993343	-0.00963547	0.608615	7.49546	6.97882	7.23714	0.823522	-0.280121	0.0561635
[truncated: 7,691 more rows]

## Sheet: TableS3
Table S3. Pearson correlation and the Spearman correlation analysis of gene expression (RPKM) between two biological replicates.
Conditions	Pearson correlation	P value	Spearman’s ρ	P value
CB_WT_3d	0.99	<0.001	0.99	<0.001
[truncated: 6 more rows]

## Sheet: Tables4
Table S4. 185 genes upregulated in MtWT on cellobiose vs. glucose after 3 d and 5 d cultivation.
[truncated: 197 more rows]

[truncated: 4 more sheets: TableS5, TableS6, TableS7, TableS8]
